# Supplementary material for: MME and PTPRC: key renal biomarkers in lupus nephritis
Source: PeerJ. 2024 Sep 16;12:e18070. doi: 10.7717/peerj.18070 (PMC11412223; doi:10.7717/peerj.18070)
Supplement: Supplemental Information 5 [file peerj-12-18070-s005.xlsx]

## Sheet: renal tubulointerstitium DEGs
	log2FC	Mean.Expr	t	P.value	adj.P	B	probe_id	DEG
EGR1	2.69713	7.52007	8.42829	9.23931e-12	4.59194e-09	16.5367	EGR1	up
LITAF	1.05608	7.52046	6.23393	5.00394e-08	1.24348e-05	8.28887	LITAF	up
ARG2	1.21314	6.79569	6.03477	1.07948e-07	1.78834e-05	7.55193	ARG2	up
RORC	1.49912	5.94607	5.63876	4.90169e-07	4.87228e-05	6.10331	RORC	up
C2	-1.20617	4.26084	-5.57972	6.12924e-07	5.07705e-05	5.88959	C2	down
IFI16	-1.13267	4.43395	-5.38124	1.29312e-06	8.72138e-05	5.1762	IFI16	down
STAT1	-1.42375	5.52229	-5.34695	1.47004e-06	8.72138e-05	5.05376	STAT1	down
IL6R	1.07538	5.21108	5.31482	1.65732e-06	8.72138e-05	4.9393	IL6R	up
PTPRC_all	-1.44466	3.85567	-5.02394	4.85662e-06	0.000219431	3.91432	PTPRC_all	down
THY1	1.22309	7.67622	4.87396	8.38697e-06	0.000297737	3.39453	THY1	up
MME	1.49023	7.36494	4.62417	2.055e-05	0.000567408	2.54375	MME	up
HLA-DRB3	-1.04629	7.56827	-4.47071	3.53083e-05	0.00087741	2.03124	HLA-DRB3	down
ZBTB16	2.89175	5.45806	4.4446	3.8684e-05	0.000915521	1.94489	ZBTB16	up
C1R	-1.36334	5.54573	-4.20923	8.71969e-05	0.0016668	1.17788	C1R	down
CCL19	-1.38976	5.15631	-3.9759	0.000191271	0.00327799	0.439669	CCL19	down
C1S	-1.05308	4.75113	-3.93716	0.000217467	0.0036027	0.319381	C1S	down
TFRC	0.99841	5.23026	3.88107	0.000261585	0.0041938	0.146461	TFRC	up
MX1	-1.38448	6.68547	-3.66614	0.000524288	0.0078961	-0.502319	MX1	down
IFI35	-1.14764	3.8599	-3.3075	0.00159496	0.019334	-1.53204	IFI35	down
CD9	1.07563	5.89158	3.28249	0.00171955	0.0200764	-1.60121	CD9	up
CCL5	-0.994339	5.27893	-2.82055	0.00649172	0.0474468	-2.81051	CCL5	down
MRC1	1.07271	5.30174	2.63365	0.0107323	0.0675182	-3.2605	MRC1	up
FKBP5	1.027	5.38349	2.4122	0.018936	0.0970228	-3.7619	FKBP5	up

## Sheet: glomeruli DEGs
	log2FC	Mean.Expr	t	P.value	adj.P	B	probe_id	DEG
CR1	2.40102	5.69097	9.51397	1.04502e-12	5.19375e-10	18.7172	CR1	up
MME	2.24592	7.76021	7.0626	5.35943e-09	1.33182e-06	10.4858	MME	up
BST1	1.28714	4.05724	6.31443	7.70965e-08	1.27723e-05	7.91135	BST1	up
RORC	1.5097	4.58682	5.38689	2.03722e-06	0.000224422	4.75656	RORC	up
FCER1G	-2.48316	4.69203	-5.34944	2.32113e-06	0.000224422	4.63117	FCER1G	down
SMAD5	1.18574	5.39006	5.30499	2.70932e-06	0.000224422	4.48258	SMAD5	up
SYK	-1.59296	2.60754	-5.01738	7.31674e-06	0.000454552	3.52925	SYK	down
FYN	1.4102	6.46296	4.90275	1.08294e-05	0.000582697	3.15367	FYN	up
CD45R0	-2.17067	4.2461	-4.87945	1.17243e-05	0.000582697	3.07766	CD45R0	down
PTPRC_all	-1.40338	3.08159	-4.77731	1.65846e-05	0.000749324	2.74591	PTPRC_all	down
MSR1	-1.44157	3.60728	-4.60525	2.95986e-05	0.00122587	2.19269	MSR1	down
TGFBI	-1.88012	5.60022	-4.56536	3.38213e-05	0.00129301	2.06548	TGFBI	down
TGFBR2	1.31276	7.12733	4.24908	9.59752e-05	0.00264998	1.07322	TGFBR2	up
MX1	-1.57311	6.14152	-4.16937	0.000124287	0.00308854	0.828075	MX1	down
CYBB	-1.21009	4.96228	-4.11262	0.000149234	0.00353188	0.654825	CYBB	down
TRAF5	1.30832	4.71972	3.77605	0.000432178	0.00791652	-0.34823	TRAF5	up
EGR1	1.19542	6.6569	3.65255	0.000632052	0.0106381	-0.704872	EGR1	up
IL4R	1.16546	5.58282	3.35101	0.00155892	0.0198663	-1.54672	IL4R	up
CCL2	-1.49386	5.66553	-3.29147	0.00185465	0.0214363	-1.70773	CCL2	down
C1QB	-1.31643	5.67463	-3.14431	0.00282955	0.0279204	-2.09778	C1QB	down
FKBP5	1.32455	5.09585	3.01792	0.0040339	0.0364518	-2.42337	FKBP5	up
HLA-DRB1	1.55267	4.48018	2.95482	0.00480112	0.0411406	-2.58255	HLA-DRB1	up
ZBTB16	1.94775	6.65866	2.94278	0.00496207	0.0417992	-2.61264	ZBTB16	up
SPP1	-1.69335	6.64572	-2.8705	0.0060395	0.0476449	-2.79157	SPP1	down
FN1	-1.39901	6.88123	-2.61395	0.0118623	0.0753949	-3.4007	FN1	down

## Sheet: total renal DEGs
	log2FC	Mean.Expr	t	P.value	adj.P	B	probe_id	DEG
EGR1	2.00678	7.15882	7.68439	9.73308e-12	4.83734e-09	16.3915	EGR1	up
MME	1.84797	7.5139	7.52474	2.14015e-11	5.31828e-09	15.629	MME	up
PTPRC_all	-1.46132	3.50708	-6.91439	4.17061e-10	6.90932e-08	12.7573	PTPRC_all	down
C2	-1.17961	3.84804	-6.76982	8.3313e-10	1.03516e-07	12.0889	C2	down
RORC	1.4682	5.37414	6.59516	1.90912e-09	1.89766e-07	11.2884	RORC	up
STAT1	-1.16226	5.45584	-5.91043	4.54075e-08	3.76126e-06	8.23512	STAT1	down
CR1	1.29754	5.21407	5.45317	3.45923e-07	2.14905e-05	6.28568	CR1	up
MX1	-1.47126	6.45186	-5.31915	6.17882e-07	3.41208e-05	5.73011	MX1	down
ZBTB16	2.53135	5.94212	4.87082	4.07099e-06	0.00014452	3.92978	ZBTB16	up
FCER1G	-1.46746	4.6918	-4.71054	7.81299e-06	0.000242691	3.30955	FCER1G	down
CD9	1.05061	5.65033	4.40536	2.60999e-05	0.000498909	2.16587	CD9	up
TGFBI	-1.24421	5.78039	-4.15686	6.72269e-05	0.000982699	1.27297	TGFBI	down
CD45R0	-1.24899	4.68939	-4.06971	9.29273e-05	0.00121539	0.968464	CD45R0	down
CCL19	-1.02736	4.46267	-3.75394	0.000289479	0.00319713	-0.0954034	CCL19	down
FKBP5	1.16758	5.25067	3.69426	0.000356437	0.00361529	-0.28928	FKBP5	up
IL4R	0.964959	5.01936	3.22652	0.00168418	0.0116256	-1.72439	IL4R	up
HLA-DRB1	1.02152	4.67197	2.63978	0.00959668	0.0429689	-3.29717	HLA-DRB1	up

## Sheet: matrics
	GSM6030648	GSM6030649	GSM6030650	GSM6030651	GSM6030652	GSM6030653	GSM6030654	GSM6030655	GSM6030656	GSM6030657	GSM6030658	GSM6030659	GSM6030660	GSM6030661	GSM6030662	GSM6030663	GSM6030664	GSM6030665	GSM6030666	GSM6030667	GSM6030668	GSM6030669	GSM6030670	GSM6030671	GSM6030672	GSM6030673	GSM6030674	GSM6030675	GSM6030676	GSM6030677	GSM6030678	GSM6030679	GSM6030680	GSM6030681	GSM6030727	GSM6030728	GSM6030729	GSM6030730	GSM6030731	GSM6030732	GSM6030733	GSM6030734	GSM6030735	GSM6030736	GSM6030737	GSM6030738	GSM6030739	GSM6030740	GSM6030741
ABCB1	3.18	2.99	3.7	3.06	4.3	4.85	5.17	4.24	3.44	3.73	4.09	4.65	4.29	3.58	4.18	4.16	4.05	4.53	4.32	3.96	2.69	5.12	3.89	6.24	3.92	7.56	3.33	4.48	4.18	5.53	3.77	3.35	5.08	3.33	7.07	6.99	7.39	6.45	7.04	7.56	7.14	6.95	6.9	7	7.74	7.36	6.64	6.35	6.4
ABL1	3.42	3.92	3.55	3.7	3.5	3.82	3.95	3.95	4.18	3.1	3.69	4.24	3.89	3.17	3.69	4.21	4.05	4.86	4.16	4.07	4.07	4.64	4.21	3.93	4.04	4.56	3.15	4.73	3.11	3.18	3.77	3.28	4.24	3.2	NA	NA	NA	NA	NA	NA	NA	NA	NA	NA	NA	NA	NA	NA	NA
ADA	4.78	4.27	4.39	4.05	5.92	4.58	3.74	3.72	3.97	4.09	4.29	3.74	5.21	3.17	5.1	3.59	4.05	3.29	3.68	3.96	4.67	3.63	4.21	4.33	3.61	3	5.78	3.53	3.2	4.37	4.05	4.38	3.76	4.49	4.51	6.21	4.72	4.73	4.77	5.18	3.88	4.51	4.7	4.81	4.18	4.07	4.46	4.98	5.11
AHR	6.36	5.74	5.48	6.48	5.95	6.66	5.35	6.63	5.77	5.68	5.59	5.89	6.26	5.74	5.58	5.62	5.35	5.7	6.05	6.03	6.26	5.87	5.89	5.95	5.83	6.31	7.13	5.87	6.31	6.54	5.89	6.08	5.95	6.72	6.27	6.42	6.08	5.48	6.09	5.78	5.45	6.2	5.84	5.65	5.82	6.4	5.53	6.21	5.16
AIRE	4.04	3.73	4.3	4.5	4.53	4.88	3.74	4.68	3.44	4.09	4.01	3.99	5.43	5.49	4.95	4.8	5.6	3.89	3.68	4.07	4.67	6.04	5.24	4.78	4.41	5.3	5.33	4.56	5.12	4.63	5.07	5.26	5.37	5.98	5.49	4.09	5.07	5.86	5.36	5.34	5.63	5.86	5.49	5.99	5.27	5.35	5.47	5.63	6.4
APP	6.96	7.47	7.35	7.08	6.33	7.86	7.61	7.2	7.53	6.72	7.61	8.67	5.76	6.75	6.53	7.47	5.6	7.43	5.77	7.98	8.44	7.24	6.96	7.98	8.14	5.05	5.73	8.24	7.31	7.39	7.83	7.27	7.22	5.12	8.36	7.7	8.33	8.18	7.91	8.24	8.29	8.36	8.08	8.43	8.52	8.7	8.03	6.52	7.25
ARG1	1.99	2.99	3.55	3.7	3.91	3.52	3.74	2.82	3.83	2.71	4.09	3.74	3.89	3.58	3.24	4.09	4.24	4.14	4.16	3.06	4.07	4.3	2.37	0.92	4.28	3.7	3.06	4.31	2.97	3.08	3.77	3.09	2.92	2.95	4.77	2.61	4.1	4.89	3.98	4.44	4.45	4.36	4.19	4.81	4.58	4.59	4.46	4.3	4.68
ARG2	4.85	5.16	4.39	4.4	4.41	3.82	4.53	4.24	3.83	5.22	3.94	3.74	3.67	4.1	3.95	3.94	4.55	3.1	3.07	3.51	3.65	3.89	4.07	3.93	4.04	3.7	4.31	4.56	3.84	4.63	4.52	3.82	3.96	4.72	7.03	6.85	6.87	7.18	5.57	7.23	6.7	6.97	7.06	7.4	7.26	7.21	7.05	6.21	6.28
ARHGDIB	7.39	7.86	8.5	6.68	6.15	7.35	8.14	8.56	8.14	7.68	8.67	7.98	6.32	8.05	6.87	8.24	5.97	8.24	6	8.34	7.56	8.56	6.9	6.95	8.05	6.5	7.33	7.92	8.56	7.92	8.34	8.24	7.66	6.07	7.31	7.43	7.54	7.51	7.81	7.34	7.93	7.43	7.24	7.22	7.95	7.15	6.8	6.85	7.49
ATG10	3.98	3.31	3.14	2.44	3.5	2.73	3.5	2.82	2.46	3.1	2.67	4.24	3.16	2.92	2.59	2.99	4.05	2.65	2.55	2.53	3.11	2.37	3.09	3.5	2.65	2.39	4.37	2.89	3.11	2.02	3.06	2.44	2.36	3.07	4.95	4.72	2.88	4.36	4.18	4.3	4.38	4.89	4.9	5.02	4.63	4.82	5.06	4.66	3.52
ATG12	5.9	5.77	5.48	8.24	7.8	6.88	5.04	4.68	4.18	6.41	4.41	5.63	10.38	6.19	7.35	5.78	8.01	5.12	8.24	6.49	5.81	7.04	7.86	7.51	4.28	4.78	9.47	6.37	6.02	7.2	7.43	7.51	6.26	9.47	6.12	5.31	5.5	6.67	5.94	6.03	5.99	6.75	7	6.16	6.07	7.25	6.33	8.29	7.66
ATG16L1	4.71	5.11	4.13	4.5	5.5	4.91	4.74	4.98	3.67	3.86	3.94	4.24	5.37	4.5	2.59	4	4.24	3.53	5.31	4.61	4.24	4.56	4.21	4.72	4.18	3.96	5.17	4.03	4.35	4.37	4.13	4.18	4.47	4.64	5.64	6.48	5.4	5.35	5.4	5.8	5.06	5.3	5.44	5.49	5.62	4.82	5.14	4.98	5.16
ATG5	5.02	4.27	4.72	4.5	5.15	4.95	5.29	4.85	4.28	4.62	4.84	4.65	4.98	4.71	4.41	4.28	5.21	3.89	3.93	3.96	3.65	5.04	4.95	4.43	4.28	4.56	5.12	4.65	4.11	4.77	4.13	4.53	4.14	5.07	5.1	5.12	5.38	5.39	5.33	5.7	5.25	5.37	5.29	5.49	5.43	5.25	5	5.5	5.35
ATG7	4.64	5.63	4.5	3.82	5.15	4.53	4.27	3.95	4.48	4.54	3.94	4.84	3.89	3.41	4.41	4.28	3	3.53	2.55	4.19	3.89	4.56	3.89	4.14	4.52	6.07	3.51	5.1	3.69	4.32	3.67	4.16	4.87	3.33	5	6.04	5.5	5	5.11	5.28	4.92	4.77	5.07	5.02	5.05	5.16	4.87	4.66	4.77
ATM	3.42	3.54	3.55	3.56	2.37	4.13	3.18	1.99	3.97	4.44	3.94	3.99	4.63	3.17	3.24	3.09	3.36	3.89	3.4	3.96	4.44	4.3	3.74	3.5	4.52	3	4.31	4.85	3.69	2.81	4.45	3.69	3.62	4.35	5.04	4.09	4.8	4.64	4.43	4.63	5.18	4.75	4.9	4.72	3.82	4.82	5.1	5.24	5.07
B2M	12.07	10.98	10.98	10.98	12.07	10.98	12.07	10.98	10.98	10.98	10.98	10.98	9.82	10.98	10.38	10.98	9.94	10.38	9.47	10.98	10.98	10.98	10.98	10.38	10.98	10.98	10.98	10.98	10.98	12.07	10.98	10.98	10.98	9.69	11.05	11.05	10.09	10.51	10.51	11.05	10.09	10.51	9.68	10.51	10.51	10.09	11.05	9.18	10.09
B3GAT1	2.82	3.73	3.39	3.06	3.19	2.82	3.18	3.29	3.22	3.86	3.12	4.24	3.16	3.17	4.18	2.84	3.36	3.1	3.07	3.06	2.69	4.15	3.35	3.09	2.65	3.96	2.55	3.12	3.29	3.3	3.47	2.57	3.47	4.02	3.98	4.23	4.88	4.78	3.76	3.8	3.88	4.08	4.08	4.31	3.75	4.18	3.91	4.66	3.85
BATF	4.04	2.52	3.84	2.44	2.83	2.62	3.18	3.72	2.92	2.23	2.83	2.52	1.49	2.6	1.76	3.09	3.67	3.29	3.4	3.68	3.89	1.84	2.37	1.92	1.54	3.4	2.34	1.84	1.49	2.37	2.63	2.62	3.32	2.6	3.68	4.09	4.1	2.9	4.62	2.36	2.33	2.74	3.07	3.3	2.61	2.14	2.65	4.3	3.62
BATF3	4.44	3.92	4.04	5.3	3.91	4.8	2.8	3.52	4.64	4.92	4.5	4.24	5.21	5.85	3.95	4.7	6.76	4.29	6.11	4.19	5.01	4.97	5.17	3.93	5.37	3.4	5.71	4.73	5.04	5.02	4.85	4.95	4.72	6.26	4.58	3.88	5.13	5.21	5.36	4.71	5.28	5.27	5.44	4.95	4.84	4.89	5.14	5.63	6.44
BAX	7.92	7.39	7.39	6.13	7.66	7.27	7.89	7.2	7.26	7.75	6.99	6.67	5.76	7.92	6.07	7.51	6.58	7.2	7.75	6.85	6.63	7.47	6.14	8.67	6.76	8.93	6.69	6.81	7.13	7.8	7.31	6.45	7.56	5.71	7.4	7.19	7.6	7.44	7.74	7.74	7.31	7.48	7.62	7.17	7.29	6.95	6.89	7.81	8.08
BCAP31	4.18	4.85	4.95	3.94	2.83	4.02	4.96	5.14	4.48	3.86	4.84	4.44	2.41	4.34	3.24	4.7	3.36	3.1	3.68	3.84	4.44	3.41	3.99	4.72	5.37	3.7	3.62	4.39	5.19	4.1	4.38	4.24	3.76	3.4	6.33	5.95	6.4	5.35	5.64	5.91	6.19	6.45	5.22	6.42	6.59	6.35	6.23	5.5	5.28
BCL10	4.83	5.33	4.86	4.83	4.53	5.05	4.53	4.85	4.56	4.44	5	5.16	4.86	4.98	3.69	4.96	4.41	4.94	4.16	3.96	5.62	5.04	4.71	5.16	4.78	5.1	5.65	5.37	4.99	5.05	5.17	5.43	5	5.96	5.64	5.66	5.91	5.76	5.87	6.15	5.28	5.79	5.7	6.12	5.57	6.35	5.88	5.83	5.84
BCL2	5.54	5.7	5.31	7.61	6.19	5.83	5.77	5.58	4.87	6.75	5.42	4.65	5.95	5.79	8.44	5.27	7.33	5.95	7.27	5.59	5.62	5.37	6.03	6.77	4.85	4.56	6.1	5.41	5.53	7.17	6.54	6.44	5.19	7.86	7.05	6.8	6.72	7.12	7.04	7.12	7	7.05	7.72	6.92	6.95	6.99	6.75	6.56	7.14
BCL2L11	1.99	1.65	2.1	2.44	1.49	2.94	1.59	3.29	3.22	3.39	0.77	3.74	1.49	2.6	3.69	2.25	3.67	1.54	3.93	2.53	2.69	1.54	2.16	2.46	1.54	1.43	1.54	2.32	3.11	2.37	3.06	1.7	3.32	1.7	5.47	4.93	4.62	3.85	3.87	4.71	4.38	3.75	2.57	4.56	4.52	4.68	4.8	2.33	2.33
BCL3	4.83	4.55	5.42	4.77	4.18	5.87	4.74	5.58	4.82	4.71	4.91	5.04	4.98	4.98	4.18	5.21	3	6.06	3.07	5.19	6.26	5.46	4.71	4.43	5.58	4.4	3.9	4.92	4.73	4.89	4.78	4.38	5.74	4.08	6.12	4.46	5.95	6.03	6.72	5.32	6.34	5.62	6.42	6.52	5.99	5.62	5.63	4.3	5.88
BCL6	5.74	4.79	5.22	3.06	1.49	4.71	3.5	4.68	5.22	4.09	3.69	3.18	3.42	3.94	3.24	2.25	3.36	2.9	5.92	3.96	2.69	2.16	4.21	4.25	3.61	3.7	2.34	3.12	3.47	4.26	3.77	3.73	3.12	2.21	4.39	6.32	5.43	2.48	5.85	4.81	4.31	4.36	3.72	3.98	2.24	3.42	4.04	4.05	3.43
BID	5.49	6.6	6.49	8.14	8.44	5.87	7.66	6.5	6	7.61	5.78	6.75	8.01	5.68	7.35	5.85	8.93	6.45	9.24	6.42	5.24	6.48	7.8	7.09	4.52	6.48	6.41	6	5.48	7.27	7.12	7.17	5.08	7.98	5.96	6.08	6.5	5.86	6.06	6.82	6.29	5.84	7.4	5.6	6.64	6.67	5.91	7.47	6.69
BST1	3.83	4.35	3.84	3.7	1.49	2.94	3.74	4.51	4.09	3.73	4.2	4.24	3.89	3.41	3.95	4.04	3.67	3.72	3.93	3.68	3.11	3.41	3.74	3.7	4.94	3.7	3.33	3.79	4.18	3.55	4.58	3.95	3.96	3.56	4.51	4.23	4.54	4.29	3.62	4.84	4.58	4.82	3.52	5.39	5.32	4.94	4.53	4.66	4.59
BST2	6.08	6.84	5.42	4.4	5.15	5.68	6	5.49	5.84	5.65	6.11	5.74	4.86	3.94	4.41	4.89	3.67	5.32	2.55	5.87	6	4.74	5.12	6.08	6.38	5.53	4.27	5.68	5.88	5.19	5.89	4.61	4.34	3.92	6.53	6.25	6.02	5	5.11	5.6	5.02	5.5	4.35	5.74	5.12	5.16	6.43	4.98	4.68
BTK	3.53	3.31	4.6	3.06	3.91	3.46	3.74	4.51	4.64	3.39	3.69	3.48	3.42	3.17	3.24	4.16	3.36	4.14	3.68	4.53	3.39	1.84	2.16	2.46	3.42	1.43	2.78	3.53	4.26	3.55	1.8	3.57	3.96	3.13	3.98	3.88	5	3.61	4.94	3.45	4.45	3.57	4.49	2.7	3.31	4.38	4.31	4.3	4.68
BTLA	3	2.52	3.14	3.44	3.19	3.67	3.5	3.29	2.92	3.1	3.12	5.27	2.41	3.94	3.95	2.71	3.67	4.53	3.93	3.68	3.11	4.64	3.52	2.83	3.42	2.39	3.41	3.53	3.39	3.18	3.06	3	3.47	2.87	4.07	4.36	3.91	4.29	2.95	4.37	4.58	4.08	3.3	4.46	4.3	3.82	3.29	3.49	4.96
C14orf166	5.77	5.6	6.41	4.5	4.63	5.33	5.88	6.1	5.15	5.3	6.23	6.25	4.47	5.57	5.25	5.59	3	5.45	5.19	5.71	5.88	5.37	4.48	5.31	5.93	4.78	5.03	5.95	6.34	5.26	5.4	5.58	5.5	4.18	7.17	6.21	6.92	6.92	6.4	6.84	6.96	7	6.57	6.9	7.34	7.19	6.77	5.63	6.57
C1QA	3.94	3.31	4.66	4.05	3.19	3.24	3.74	3.72	6.15	4.09	4.95	3.18	4.74	4.25	4.68	6.03	3.36	4.66	4.9	5.54	5.24	3.41	4.32	5.01	4.18	3.7	3.06	4.16	6.22	4.2	3.06	5.49	3.76	4.41	5.54	5.25	5.66	4.89	5.18	4.49	5.4	4.98	4.9	5.08	4.68	4.68	5.74	4.48	4.63
C1QB	5.78	4.66	6.51	5.19	5.08	4.88	4.67	6.1	8.34	5.08	7.27	3.99	5.76	6.19	4.95	9.09	5.71	6.33	5.19	7.39	6.38	5.87	5.24	5.78	7.43	5.23	4.81	4.03	8.44	5.66	4.97	8.14	7.31	5.01	7.26	5.68	7.26	7.31	7.15	5.58	7.26	7.19	5.62	6.46	6.78	5.88	7.98	7.18	7.3
C1QBP	4.1	4.5	4.3	2.76	3.19	3.94	3.95	3.72	3.22	3.39	3.84	3.99	4.07	2.92	3.69	3.09	4.67	4.66	3.07	3.96	1.54	3.63	2.58	3.09	3.92	3.96	3.51	4.25	4.26	4.16	3.92	2.92	3.76	3.47	6.29	5.27	6.02	5.39	5.18	6.14	6.14	6.48	5.37	6.8	6.39	6.59	6.4	4.3	5.43
C1R	5.41	5.71	5.02	5.08	5.3	5.15	5.1	5.69	5.22	4.8	5.62	6.07	4.07	4.34	3.24	4.28	3	4.41	3.4	5.19	5.77	2.97	3.74	5.21	6.84	3	3.72	5.64	6.12	5.77	5.4	4.8	6.19	3.47	6.51	6.35	6.35	6.06	6.28	4.74	7.07	6.88	5.15	6.42	5.93	6.81	6.89	4.66	4.53
C1S	4.44	3.73	3.96	4.05	3.5	3.52	4.27	4.98	4.64	3.39	3.84	3.99	2.83	2.8	3.24	3.32	3.87	3.1	3.4	4.43	5.01	2.97	3.2	4.33	4.04	4.78	3.15	3.68	3.69	4.37	4.13	3.14	3.96	2.95	5.84	5.12	5.56	4.96	4.94	4.82	6.23	5.53	4.49	5.39	4.97	5.91	5.94	4.48	3.72
C2	4.26	3.92	3.39	3.7	3.5	2.94	3.18	4.24	4.28	2.23	3.69	3.99	2.83	3.17	3.69	3.59	3	3.53	3.07	3.51	4.24	2.37	3.09	5.07	4.04	6.19	2.55	2.32	3.84	3.18	3.06	3.66	3.96	2.95	4.64	4.98	5.5	3.93	3.98	4.43	5.11	4.64	4.61	5.28	4.18	5.09	5.21	4.05	4.11
C4A/B	6.91	6.08	4.86	6.11	7.13	6.77	5.17	5.14	4.75	6.16	5.84	4.65	6.06	6.19	5.1	5.08	5.86	5.45	4.48	4.32	5.88	5.54	4.71	5.47	5.46	6.99	4.45	5.45	4.8	6.63	5.49	5.91	5.6	4.43	7.93	10.09	8.43	7.63	8.36	7.29	8.03	8.29	8.36	8.52	8.24	8.24	8.36	8	8.8
C4BPA	4.26	3.31	2.45	2.44	3.5	2.35	1.59	1.99	2.46	2.23	3.33	2.07	3.16	2.41	3.24	1.54	2.56	2.9	1.92	1.65	1.54	3.63	1.7	2.83	2.04	3	3.06	2.89	1.49	2.37	2.36	0.92	3.12	2.46	4.25	4.77	4.1	3.85	2.33	3.97	3.88	4.01	3.9	3.77	3.89	4.68	3.52	3.76	3.3
C5	4.44	5.58	4.21	4.58	4.18	4.07	5.59	5.14	3.67	5.6	4.72	5.27	3.89	4.1	3.24	4.58	3.87	5.12	6.11	3.84	5.01	4.15	4.07	5.31	4.41	6.12	3.94	4.56	3.84	4.26	4.38	3.9	4.47	3.64	5.6	5.44	5.7	5.3	5.33	5.82	4.97	5.02	5.07	5.74	5.46	5.29	5.68	5.36	5.28
C6	3.75	5.3	4.13	5.3	4.3	4.27	4.6	4.24	4.4	3.73	4.09	4.65	4.74	4.71	5.95	4.04	5.21	4.29	4.48	3.38	4.44	5.04	4.81	5.31	3.61	5.71	4.61	3.4	3.47	4.42	4.05	4.34	3.47	6.23	4.25	5.62	5.17	4.96	4.74	5.33	5.57	5.21	5.55	5.28	5.62	5.65	5.5	5.74	5.39
C7	4.44	2.52	3.84	4.4	3.19	4.58	2.8	5.69	3.22	3.39	4.65	4.44	2.83	3.94	2.59	3.42	3.36	3.53	3.07	3.84	5.7	1.84	3.2	3.93	3.78	3.96	3.41	3.79	4.48	5.5	4.45	4.31	5.5	3.2	8.12	6.87	7.81	9.02	8.03	7.41	8.61	8.43	8.12	8.7	8.61	9.02	8.18	7.26	8.29
C8A	2.38	2.99	3.55	3.27	3.19	3.73	2.36	3.52	1.7	2.71	3.12	3.18	3.89	4.25	3.24	2.71	3.36	3.29	4.16	3.38	3.11	3.98	3.89	3.09	2.98	1.43	3.51	3.68	2.34	2.81	3.06	3.43	2.36	3.7	4.25	3.25	3.67	4.06	3.87	3.83	3.34	4.11	4.61	5.11	4.18	3.64	3.91	4.05	4.73
C8G	3.18	3.92	3.55	3.82	4.05	3.09	2.8	2.82	2.92	3.1	3.53	3.48	2.41	2.92	3.24	3.23	4.41	3.53	3.68	5.19	4.07	2.37	3.35	3.09	3.61	3	2.78	3.4	3.69	2.02	3.92	2.85	3.32	3.94	3.68	3.25	3.67	3.93	3.87	4.63	4.23	4.31	3.9	4.95	4.41	4.59	4.8	4.48	5.35
C9	1.99	2.99	3.14	2.76	2.37	3.24	2.8	3.95	3.22	2.71	3.12	3.74	3.16	3.58	4.18	3.23	3.87	3.29	4.16	2.53	2.69	4.39	3.09	3.5	3.22	2.39	3.06	3.53	2.07	3.18	3.29	2.27	2.92	2.95	3.68	3.62	4.8	4.36	3.34	4.49	3.65	4.46	3.9	4.19	4.18	4.18	4.04	4.05	4.96
CAMP	3.53	3.31	2.45	3.06	3.73	4.13	3.18	2.82	3.67	2.23	2.67	3.18	4.74	3.71	4.68	4.28	4.84	3.72	4.66	3.68	2.69	4.74	3.99	3.93	3.42	3	3.82	4.16	3.69	3.3	3.67	3.86	3.96	4.74	4.51	4.09	4.54	5.13	4.62	4.62	4.58	5.02	4.9	4.31	3.31	4.68	4.73	5.74	5.28
CARD9	3.18	2.52	3.55	3.06	3.19	3.24	3.18	4.24	3.97	3.86	3.44	3.48	3.42	2.92	3.69	3.83	3.87	3.29	3.07	2.53	2.18	2.37	3.09	3.09	3.78	3.4	3.9	4.16	3.47	3.18	3.06	3.28	4.34	3.79	4.16	4.36	4.88	3.67	3.76	4.25	3.88	3.87	4.19	4.87	3.89	3.82	4.39	4.05	4.83
CASP1	5.54	5.74	4.5	5.42	5.94	4.44	6.29	2.82	5.07	5.77	5.88	3.74	5.05	4.5	4.18	5.51	3	4.41	4.66	5.1	4.67	4.74	3.52	4.87	5.21	4.4	4.12	4.8	4.26	5.08	4.58	4.69	4.65	3.4	4.77	5.4	5.26	4.83	5.69	4.48	4.8	4.91	5.07	4.46	5.32	4.38	4.87	4.05	5.07
CASP10	3.64	3.73	3.14	4.4	2.83	4.18	3.95	4.24	3.44	2.71	3.33	4.24	4.86	5.16	3.95	4	4.41	4.66	4.66	3.68	3.65	5.23	4.95	3.93	4.52	4.2	4.63	4.39	3.84	3.69	4.13	4.04	4.58	4.54	4.71	4.58	4.29	5.06	4.7	4.64	4.72	5.12	5.29	5.02	4.97	5.21	5.47	5.5	5.69
CASP2	5.95	6.29	6.19	6.36	7.1	6.58	6.72	5.88	5.22	6.19	5.88	6.54	7.39	6.41	7.92	5.97	7.33	5.45	6.63	4.71	5.62	6.5	7.66	6.45	5.83	6.44	6.92	6.48	5.88	7.09	6.6	6.36	5.42	7.39	6.27	7.26	6.12	6.72	6.37	6.71	6.32	6.3	6.81	6.32	6.37	6.64	5.81	6.59	6.19
CASP3	5.02	4.92	5.53	4.4	4.77	4.98	5.84	4.24	4.4	5.14	4.84	5.04	4.18	4.71	4.68	4.58	3.36	4.29	3.68	4.19	5.51	4.74	3.99	4.87	4.94	4.85	3.51	5.04	4.35	4.53	4.2	3.82	4.24	3.56	5.43	5.95	5.1	5.21	5.24	5.8	5.32	4.58	4.8	4.81	5.05	4.48	4.91	4.66	5.28
CASP8	3.89	2.52	3.14	3.94	3.5	3.6	3.74	3.52	3.97	3.39	4.2	3.99	3.16	3.94	2.59	4.37	3.36	4.53	2.55	4.43	3.39	4.3	4.07	3.93	4.28	3	3.41	3.92	3.76	3.4	3.67	3.43	4.24	3.33	5.49	4.77	5.17	4.73	4.9	4.87	5.11	4.98	4.8	5.49	5.21	4.75	5.06	4.66	4.73
CCBP2	3.32	2.99	2.8	2.76	3.91	3.31	3.74	3.72	3.22	1.3	2.2	2.52	3.16	3.41	1.76	2.99	3	3.89	1.3	2.2	3.65	3.98	3.89	3.28	2.34	3.7	3.72	3.12	3.47	3.08	3.47	3.16	3.96	3.64	4.31	4.63	3.67	3.4	3.34	4.11	3.65	4.31	4.19	4.4	4.18	3.82	4.14	4.05	3.62
CCL11	4.64	4.4	4.21	6.05	6.18	5.24	3.95	2.82	3.67	5.08	4.35	3.74	6.81	5.44	5.39	4.86	5.53	4.94	4.66	3.84	5.01	5.64	6.45	4.94	4.04	4.2	7.92	4.39	4.48	5.56	5.17	5.3	5.19	6.68	5.78	5.89	5.61	5.89	6.5	5.05	5.11	6.57	5.78	5.49	5.43	6.35	6.16	6.94	6.69
CCL13	3.64	3.92	3.7	3.44	3.5	2.62	4.13	3.52	3.67	4.09	3.44	3.99	3.89	3.94	3.24	3.66	3.36	3.53	3.93	3.38	4.07	3.89	3.99	2.46	4.18	3.4	3.25	3.79	3.47	2.81	3.67	3.43	2.92	3.4	3.68	2.61	3.31	4.06	4.48	4.04	3.65	3.87	4.98	4.08	4	4.29	4.73	4.05	3.79
CCL15	3.42	3.73	2.45	4.58	5.01	4.25	3.18	4.24	3.22	3.6	3.12	3.18	4.47	4.1	4.68	3.66	4.55	3.53	6.22	1.65	4.44	4.23	5.38	3.09	3.61	3.96	5.93	3.92	2.97	3.94	4.28	5.23	3.47	6.5	5.19	5.76	4.72	4.83	4.34	5.24	4.97	5.99	5.55	5.88	5.39	6.04	5.14	5.24	5.28
CCL16	3.18	2.99	2.8	3.44	3.19	3.4	2.8	3.72	2.92	3.86	3.53	4.24	2.41	4.25	1.76	3.51	4.05	3.29	3.4	2.53	3.89	4.07	4.32	3.09	3.61	2.39	4.74	3.12	2.97	2.37	3.47	3.82	3.96	4.36	4.88	4.23	4.62	4.54	4.62	4.45	4.58	4.64	4.7	3.98	4.58	4.29	4.22	5.24	5.39
CCL18	2.61	3.54	3.14	2.76	3.5	1.8	2.8	2.82	2.46	3.1	2.2	2.52	2.41	3.17	2.59	3.23	3.36	2.65	2.55	2.83	3.65	3.76	2.74	3.5	1.54	3.7	3.9	2.32	2.07	3.4	2.36	3.06	2.36	3.92	2.9	3.62	2.88	4.16	3.34	3.8	3.65	3.43	3.52	2.53	2.48	3.42	3.01	3.76	4.19
CCL19	2.82	3.31	3.55	3.27	4.05	3.6	3.18	6.21	3.22	4.09	3.12	3.18	3.16	3.58	2.59	2.02	2.56	3.53	3.07	3.19	4.07	3.41	3.35	2.83	4.18	6.75	4.05	3.68	3.94	4.04	3.29	3	4.47	4.05	5.67	4.58	6.22	6.5	7	4.62	7.7	4.15	4.9	4.56	4.63	3.97	4.22	3.76	5.53
CCL2	7.43	5.55	6.55	6.05	8.72	7.08	5.47	5.88	6.19	8.44	5.78	5.38	6.94	6.28	4.41	6.36	3.87	6.5	7.8	6.71	6.38	3.63	3.35	5.07	4.78	8.05	5.54	5.55	6.08	7.66	4.2	5.56	6.88	3.27	6.16	6.21	6.62	6.06	8.43	5.25	6.08	4.71	6.04	4.95	5.7	5.25	5.38	6.64	4.77
CCL20	3.18	3.73	2.1	3.27	3.19	3.4	3.18	3.95	3.97	3.39	3.53	3.48	3.67	3.58	4.18	3.83	5.43	3.29	4.48	3.84	4.44	3.76	4.21	2.46	3.61	3	2.1	3.79	3.69	3.55	3.29	3.21	3.76	4.27	4.64	3.88	4.1	5	4.39	3.54	4.38	5.04	4.9	4.87	4.35	5.09	4.46	5.5	4.68
CCL22	3.64	3.31	4.13	3.56	3.91	3.6	3.5	3.95	3.44	3.6	3.69	4.65	4.29	3.17	2.59	3.66	4.05	2.36	3.93	3.38	4.86	3.41	3.74	2.83	3.92	4.2	3.72	3.4	3.11	4.1	3.47	3.66	3.96	4.29	3.83	4.54	4.1	4.6	3.34	4.44	4	4.41	3.3	4.72	4.46	4.38	4.46	5.36	4.96
CCL26	3.18	1.65	3.14	2.76	2.83	3.4	3.5	2.82	3.67	3.73	3.84	2.52	2.83	2.92	3.95	3.23	3.36	4.14	2.55	3.19	2.69	4.23	3.09	3.5	3.22	3.4	3.51	3.79	3.39	2.02	3.57	3	3.32	3.47	2.65	3.25	3.91	4.29	2.95	3.73	3.34	4.31	3.52	3.77	4.08	4.38	3.84	3.05	4.03
CCL3	4.97	4.44	6.58	5.34	4.05	3.67	3.18	3.95	6	5.45	5.3	4.65	5.21	5.92	4.68	6.31	4.24	6.15	3.68	6.35	4.44	5.6	4.81	4.33	5.46	5.23	3.82	4.8	6.27	4.85	3.67	5.7	7.06	4.43	4.64	3.88	5.81	5.48	5.36	3.97	5.87	5.12	5.88	4.95	5.49	4.59	5.88	6.46	5.84
CCL4	5.69	5.39	6.07	5.54	4.3	3.94	4.13	4.85	6.07	6.11	6.19	3.74	4.98	5.57	5.1	6.63	5.71	6.19	4.78	5.93	4.86	6.2	4.71	5.85	5.02	7.24	4.67	4.73	5.94	4.89	4.38	6.23	6.51	4.85	5.19	4.46	5.85	6.1	6.03	5.05	5.71	6.16	6.24	5.39	6.05	5.25	5.53	6.64	6.69
CCL5	5.35	5.26	3.14	5.19	6.5	3.24	6.5	4.24	4.75	4.09	6.03	4.24	3.89	4.1	3.69	5.32	3.36	3.72	3.68	3.68	3.65	3.76	4.48	3.28	4.78	9.94	2.92	4.39	3.29	3.08	3.29	4.04	5.6	3.33	4.95	6.58	6.12	4.86	6.79	5.46	5.48	4.43	5.44	4.31	5.35	4.82	4.91	4.48	3.62
CCL8	5.15	2.52	3.39	5.12	3.5	5.43	2.36	3.29	3.67	6.07	3.12	2.52	6.32	5.06	7.1	4	6.21	3.53	6.81	3.96	3.89	4.84	6.6	6.05	3.78	4.7	6.11	4.03	3.94	3.3	5.1	4.9	2.36	3.27	5.72	4.54	4.88	4.29	5.24	4.49	4.58	5.38	5.07	4.77	4.58	4.48	5.17	6.41	5.28
CCND3	6.21	6.5	6.23	5.47	6.01	5.43	6.23	6.41	5.54	5.08	6.21	4.92	6.51	5.44	6.28	5.41	4.84	5.22	5.97	4.71	5.24	6.26	6.2	5.91	5.72	5.05	6.75	5.73	4.48	4.89	6.23	5.22	5.5	5.33	6.4	6.7	6.3	5.68	5.91	6.65	6.46	5.79	6.04	5.89	6.05	5.72	6.38	6.13	6.01
CCR1	5.02	4.44	6.19	4.05	6	4.39	2.8	4.24	5.9	4.8	4.58	5.16	6.01	5.85	5.72	5.81	4.24	4.86	5.38	5.78	4.07	5.12	5.05	5.31	4.62	5.4	6.79	4.25	5.97	4.81	3.92	6.31	5.68	6.29	5.86	5.08	5.81	5.98	5.4	4.78	5.37	5.92	5.95	5.15	5.39	5.16	5.72	6.13	6.12
CCR10	3.94	4.27	5.15	5.25	4.9	4.66	4.13	4.24	4.48	4.09	4.09	5.38	4.63	4.71	3.95	4.16	4.84	4.14	2.55	4.32	5.01	4.07	3.99	5.12	4.62	3.7	3.72	4.39	4.35	4.63	5.1	5.08	4.24	5.77	4.77	2.61	4.62	3.85	4.31	4.86	4	4.87	4.19	4.51	4.68	4.68	5.25	4.84	4.83
CCR2	2.82	3.73	3.39	4.28	3.5	3.6	3.95	3.95	2.46	2.71	4.65	4.44	4.29	4.5	2.59	3.83	4.41	2.65	3.07	3.19	3.89	4.9	4.71	3.5	3.61	3	4.55	3.26	4.18	3.83	3.29	4.88	4.24	5.31	5.1	5.1	5.35	6.37	6.01	4.94	5.63	5.43	5.62	4.46	4.93	4.29	5.1	5.97	6.44
CCR5	3.42	3.31	3.39	3.82	4.66	3.4	4.13	2.82	3.97	3.6	4.01	2.52	3.16	3.81	3.95	3.23	4.24	2.36	3.4	3.19	2.69	3.14	3.89	4.43	2.98	3	4.55	3.26	3.47	3.08	3.67	3.86	2.7	5.17	1.59	3.88	4.54	3.51	4.1	3.83	4.38	3.64	3.9	3.87	3.63	4.07	3.01	3.76	4.19
CCR6	3.7	4.69	3.7	6.61	6.04	4.36	4.74	4.51	3.83	4.09	4.2	3.74	4.47	4.71	5.1	4.58	6.76	5.22	4.9	4.32	4.24	5.12	5.69	4.25	4.41	4.2	6.84	4.73	4.42	5.7	4.71	5.85	4.72	6.66	5.28	5.08	5.13	5.21	4.98	5.5	4.97	5.08	5.15	5.22	5.05	6.18	4.46	6.85	5.46
CCR7	3.18	4.11	3.96	4.28	4.3	3.73	4.6	3.95	3.83	2.71	3.69	3.18	2.83	2.6	4.41	3.17	5.71	2.9	5.12	4.07	5.24	4.3	4.41	4.25	4.04	5.17	4.45	3.92	2.07	3.18	4.28	3.16	1.22	5.54	4.25	4.46	4.21	3.74	4.55	4.47	3.65	3.93	2.87	3.87	3.63	4.07	4.04	4.48	4.19
CCR8	1.99	2.52	1.7	1.96	3.19	2.73	2.36	1.99	2.46	2.71	2.67	4.24	3.16	3.17	3.24	3.09	3	3.72	4.16	3.19	3.39	3.63	2.92	3.09	2.65	3.4	3.62	3.4	3.29	2.96	2.82	3.28	4.24	3.84	3.33	4.85	3.91	3.61	3.62	3.33	3.07	3.57	3.07	4.19	3.47	4.29	1.87	4.48	3.62
CCRL1	4.54	5.63	4.21	6.16	5.15	5.37	5.17	4.85	3.83	5.73	5	4.44	6.13	5.39	5.39	4.92	6.08	5.03	6.57	3.68	5.42	6.04	5.96	6.23	4.52	5.86	6.72	4.56	4.6	5.39	4.85	5.81	5.74	7.04	5.96	6.6	6.22	6.39	5.57	6.16	5.81	6.15	6.37	6.2	6.12	6.4	5.94	6.06	7.1
CCRL2	4.33	4.02	4.86	4.17	5.32	4.48	4.13	4.85	4.48	4.86	4.2	4.44	5.12	4.71	4.18	4.28	4.55	5.03	6.03	5.19	4.07	4.97	4.32	3.93	4.78	3.96	4.71	4.31	4.75	4.73	3.92	4.76	5.28	6	4.51	3.25	4.29	4.16	4.39	4.64	4.58	4.66	4.8	3.98	4.46	4.18	4.53	4.98	4.59
CD14	4.81	4.27	4.95	4.77	5.35	4.39	3.95	4.24	4.93	4.54	4.5	4.24	6.49	4.1	5.25	5.46	4.67	4.14	5.54	5.19	3.39	3.41	4.56	4.14	4.94	4.56	5.21	4.73	5.75	5.02	4.13	5.87	4.14	5.86	5.64	2.61	5.31	5.72	5.5	4.91	5.11	5.44	4.49	4.95	5.24	5.4	5.47	5.97	5.76
CD160	3	4.02	3.14	4.17	3.5	3.31	3.95	3.95	3.67	3.1	3.84	4.44	3.67	3.41	3.69	4.73	4.55	4.29	3.4	4.07	3.11	5.12	4.56	3.7	4.78	4.4	2.78	3.92	2.78	3.4	4.64	3.21	3.32	4.33	4.25	3.88	4.72	4.45	4.31	4.81	5.02	4.72	4.98	4.72	4.52	4.07	4.6	4.05	5.49
CD163	4.18	4.02	4.79	4.28	2.83	3.52	2.8	3.95	6.33	3.6	4.84	3.18	3.16	4.58	2.59	5.38	4.67	4.86	3.93	4.82	4.67	3.98	3.52	3.28	4.62	4.4	3.62	2.89	5.27	3.9	3.92	6.14	4.72	4.6	4.77	5.6	5.5	5.13	5.08	4.87	5.94	5.73	4.19	4.31	5.12	4.38	5.47	3.76	5.07
CD164	7.66	7.8	7.73	6.53	6.63	7.47	7.47	7.03	6.7	7.24	7.24	7	6.19	6.57	6.35	6.76	5.53	6.75	6.99	7.2	7.13	7.18	6.69	7.27	7.24	6.7	6.34	7.17	7.04	7.24	7.47	7.35	6.84	6.23	8.61	9.02	7.98	8.12	7.54	9.06	8.12	8.24	8.8	8.29	9.18	8.61	8.29	7.18	7.7
CD19	3.98	4.44	3.14	4.9	4.3	4.02	3.74	3.29	3.22	4.71	3.44	5.04	4.74	4.98	4.41	3.17	5.6	3.29	4.48	4.61	3.39	4.56	5.09	3.93	3.92	5.63	5.17	3.79	3.6	4.53	4.71	4.18	3.96	4.85	4.51	5.01	4.1	4.36	4.87	4.9	5.21	4.41	5.22	4.56	3.89	4.75	4.39	4.05	3.85
CD1A	3.18	3.31	3.14	5.04	4.3	3.52	2.36	0.92	1.7	2.23	2.2	2.52	4.63	3.17	3.69	3.42	4.67	2.9	5.59	3.19	0.77	2.97	3.67	3.7	3.42	2.39	4.78	2.32	2.78	2.81	1.8	3.69	2.36	4.99	2.65	4.09	3.31	3.4	3.51	3.53	2.14	3.82	3.9	3.1	3.47	3.1	3.29	4.3	4.68
CD209	3.89	3.92	3.7	4.28	4.77	3.46	3.5	4.24	4.4	4.09	4.65	3.99	4.86	4.1	4.68	4.66	4.24	4.41	5.95	3.06	3.89	3.98	4.07	3.93	3.22	3	4.5	3.12	3.29	4.04	3.47	4.56	3.96	4.91	4.71	5.5	5	5.1	4.77	4.25	4.31	4.72	4.8	4.46	4.46	3.82	4.04	4.84	5.11
CD22	3.32	3.73	3.39	3.44	3.19	3.9	4.13	3.29	2.92	3.1	4.2	3.48	3.67	3.17	4.41	3.72	1.37	4.14	2.55	4.19	3.65	4.23	4.07	3.93	3.61	3	3.41	3.79	2.97	2.37	3.47	2.44	3.12	2.95	4.51	4.09	4.1	4.78	4.28	3.83	3.65	4.69	4.49	4.81	5.05	4.18	4.8	3.49	4.36
CD24	4.85	4.44	5.1	4.71	4.18	6.09	5.42	6.63	4.4	5.22	5.21	6.34	5.43	5.12	5.39	6.03	5.97	5.7	3.68	5.97	6	6.81	5.51	4.56	5.42	5.67	5.14	5.78	5.97	6.11	5.86	5.13	6.19	5.23	9.68	8.92	9.42	9.68	9.18	10.09	9.68	9.68	10.51	9.68	9.68	9.42	9.42	9.42	9.68
CD247	4.22	4.35	3.96	4.05	6.04	4.68	4.87	2.82	2.46	4.54	4.2	3.48	7.45	5.23	3.95	4.09	6.76	3.72	3.93	4.32	4.44	4.64	6	5.66	3.61	5.9	5.71	3.4	2.78	4.1	4.64	4.78	5.14	6.14	4.31	4.85	4.44	4.89	5.57	4.79	4.23	4.27	4.7	4.77	4.52	5.25	4.53	6.7	5.21
CD27	2.82	2.99	4.04	2.76	2.37	3.46	3.18	3.72	2.92	3.1	3.69	3.99	2.83	2.6	3.24	2.84	3	3.1	3.4	3.68	2.69	3.52	3.52	2.83	3.42	4.2	2.34	3.79	3.76	2.37	3.29	3.09	1.73	3.2	4.58	4.23	4.62	3.61	5.2	4.37	3.88	3.57	4.61	4.31	2.98	3.64	4.6	3.05	3.79
CD274	3.64	4.55	4.5	4.05	4.9	3.7	4.45	3.72	3.67	4.33	3.94	4.44	4.07	4.85	3.69	3.32	3.67	3.1	5.19	4.07	3.11	2.97	4.14	2.46	3.92	2.39	4	3.4	3.76	4.16	4.2	4.18	3.96	5.12	3.49	4.85	3.67	4.6	4.1	4.35	4.13	4.21	5.29	3.77	4.46	4.59	4.31	4.3	4.59
CD276	5.56	4.79	6.86	4.5	4.66	5.57	5.71	6.1	6.6	5.41	5.78	5.89	4.47	5.92	4.68	6.29	6.21	5.59	4.48	6.76	5.62	5.94	4.71	4.72	5.72	3.4	4.89	5.87	7.17	5.53	5.75	5.64	6.96	4.88	6.38	5.25	6.43	6.5	6.53	6.45	6.37	6.72	6.16	6.23	6.55	6.04	6.21	6.46	6.25
CD28	3.98	4.02	3.14	3.7	3.73	4.18	3.74	3.72	4.18	3.86	3.44	4.24	4.63	4.25	3.24	4.37	5.21	4.14	5.19	4.32	3.89	4.64	4.48	3.28	3.61	4.7	5.03	3.4	3.6	3.83	4.05	3.5	2.7	5.39	4.58	4.46	3.67	4.83	4.62	4.25	4.13	5.28	4.35	4.08	4.63	4.59	4.22	4.66	4.46
CD34	5.15	6.6	5.31	4.5	5.15	6.29	4.74	4.85	5	5.56	5.72	5.16	4.47	4.58	5.25	4.5	3.87	5.9	4.48	5.54	5.01	4.23	4.32	5.4	5.21	4.4	3.25	6.13	4.53	4.58	5.21	5.05	4.47	4.18	4.64	5.17	5.07	4.06	3.76	4.73	2.61	3.37	3.9	4.62	4	3.97	4.04	4.48	3.72
CD36	4.33	2.99	6.41	1.96	2.83	2.35	4.27	4.24	6.11	3.6	3.44	3.18	4.63	3.71	3.69	4.8	2.56	4.29	3.4	4.61	2.18	3.76	3.09	3.28	4.18	3	3.72	3.4	6.29	3.69	3.29	4.88	5.6	3.74	4.77	4.67	4.72	4.42	3.62	4.3	4.45	4.78	4.35	4.87	5.05	5.21	4.96	4.66	4.19
CD3D	3.64	2.52	3.14	3.06	3.73	3.9	3.95	1.99	2.92	3.1	4.2	1.3	3.67	4.85	4.68	3.83	5.86	4.66	4.48	4.19	3.11	4.48	4.56	3.93	3.42	3	4.24	4.03	3.94	3.18	3.67	3.76	3.96	4.39	4.16	4.23	4.62	5.48	5.2	4.13	4.38	5.19	4.98	4.46	4.95	5.21	4.73	4.98	5.53
CD3E	2.61	4.27	3.55	3.06	2.83	3.16	2.36	3.72	2.92	3.1	3.33	3.48	3.16	3.58	2.59	3.42	3	3.53	4.32	4.07	3.65	3.41	2.58	3.28	2.98	3.7	3.82	3.53	2.53	3.55	3.29	3.09	3.96	3.47	3.98	3.88	4.62	4.06	5.57	3.53	3.88	3.17	3.72	3.77	3.75	4.07	3.69	4.3	4.68
CD3EAP	4.01	3.92	4.5	5.34	4.41	5.21	4.91	4.24	2.92	4.71	4.5	3.99	5.29	5.92	5.58	5.21	4.99	4.29	3.93	4.43	5.01	6.55	5.3	4.78	5.21	3.4	4.98	5.24	5.33	4.69	5.13	5.19	4.87	5.34	5.8	4.09	5.17	6.31	5.61	5.72	6.1	6.12	5.88	6.07	5.82	5.79	6.06	5.97	6.33
CD4	4.97	5.7	4.66	5.08	4.18	5.97	5.59	5.58	6	4.62	6.44	5.97	5.29	4.58	5.25	6.44	5.35	5.7	5.92	5.87	5.88	6.14	5.69	4.94	6.26	4.2	5.42	6.42	5.37	4.42	6.05	5.07	4.47	5.64	4.51	5.41	4.62	4.78	5.05	4.49	4.85	5.04	4.61	3.87	4.68	4.75	4.39	5.63	5.28
CD40	4.61	4.89	5.42	5.65	5.15	5.68	5.73	6.21	5.84	5.22	6.53	5.16	5.37	5.79	5.78	6.07	5.6	5.59	5.84	5.87	6.11	5.98	5.09	4.83	6.45	5.36	4.84	5.37	5.71	5.28	5.55	5.02	5.5	5.28	4.88	4.85	6.02	5.96	6.14	5.68	5.25	5.47	5.44	5.54	5.76	5.09	5.74	5.24	5.94
CD40LG	4.5	4.44	4.3	5.47	6.21	5.33	5.9	5.79	5	6.57	4.72	5.63	7.08	6.28	6.53	4.58	7.33	4.66	6.86	4.97	6.19	5.23	6.29	6.48	5.3	4.96	6.08	4.8	4.8	5.37	5.55	4.88	4.87	7.43	5.19	5.58	5.26	5.86	5.61	5.29	4.85	5.86	6.12	4.56	5.35	6.18	5.58	7.76	5.6
CD44	6.63	5.88	7.15	4.66	4.18	5.6	5.42	6.63	6.43	6.53	5.96	4.44	5.37	6.08	5.39	6.13	4.41	6.41	6.29	6.49	5.24	4.74	4.32	4.25	4.85	5.6	5.06	5.24	6.77	6.38	5.31	5.67	7.39	4.41	5.93	6.12	6.95	7.09	8.12	5.75	7.29	6.33	6.48	6.09	6.47	6.92	5.68	5.5	6.64
CD45R0	5.88	4.69	6.94	5.08	4.59	4.18	4.13	4.85	6.37	5.53	5.3	2.52	3.67	4.25	3.24	6.44	3.67	4.94	6.14	5.64	4.44	2.62	2.16	5.07	4.18	7.39	3.33	3.53	5.78	4.96	3.47	6.7	5.5	2.81	5.36	6.17	6.15	3.85	6.75	4.93	6.06	3.37	4.9	5.08	5.19	5.49	4.31	3.49	3.91
CD45RA	2.82	4.02	3.14	3.27	3.5	0.92	3.5	1.99	1.7	3.39	3.84	2.07	1.49	2.41	2.59	1.88	2.13	2.36	3.07	2.83	3.39	2.97	1.7	2.46	3.42	2.39	2.55	0.77	2.07	1.37	2.63	2.27	2.36	1.7	NA	NA	NA	NA	NA	NA	NA	NA	NA	NA	NA	NA	NA	NA	NA
CD45RB	3.83	4.5	4.95	3.94	4.3	2.56	4.38	4.24	5.15	4.09	4.84	3.18	3.89	4.71	4.68	4.7	2.56	4.41	3.07	3.84	3.39	3.14	2.58	5.01	4.85	5.23	2.92	3.92	4.01	4.32	2.36	4.53	3.32	2.46	NA	NA	NA	NA	NA	NA	NA	NA	NA	NA	NA	NA	NA	NA	NA
CD46	5.51	5.37	5.66	4.28	4.18	5.05	5.25	6	5.22	4.71	5	6.07	3.16	3.94	3.69	4.58	3.36	4.53	3.07	5.49	5.24	4.74	4.95	4.43	6.12	3	4.58	6.05	5.33	4.73	5.49	5.04	4.87	3.64	6.45	6.1	6.76	5.48	5.91	6.33	6.55	6.54	5.78	6.88	6.82	7.05	6.59	5.36	5.11
CD48	3.64	4.02	3.84	2.76	3.91	3.67	3.18	3.29	3.44	3.86	3.44	4.24	3.89	3.94	4.41	3.94	5.07	4.01	3.93	3.68	3.11	3.89	3.89	3.93	3.92	3.4	4.37	4.16	4.42	3.76	4.05	4.09	4.47	4.45	4.45	3.62	4.1	4.54	4.25	3.73	4.52	4.46	4.35	4.66	4.18	4.29	4.22	3.76	4.19
CD53	5.41	5.38	5.15	5.15	4.47	4.07	3.74	4.24	5.62	5.36	4.65	3.48	4.29	4.1	3.95	5.49	4.24	4.41	4.66	3.96	3.39	3.89	4.56	5.31	4.52	5.99	3.9	2.89	5.97	4.47	4.05	5.62	5	5.02	3.68	5.76	4.44	4.78	6.14	4.84	5.25	4.94	4.49	4.19	4.74	3.82	4.14	4.3	4.73
CD55	4.01	3.54	4.39	4.28	3.5	4.55	3.74	5.3	4.4	4.71	4.72	5.04	3.89	5.49	3.95	4.16	4.41	5.85	4.48	3.68	3.89	4.48	4.32	3.93	5.1	3.7	4.55	5.49	3.47	3.55	4.2	3.09	4.34	4.12	5.54	3.88	5.31	5.06	4.48	4.93	4.75	5.1	4.8	5.96	5.27	5.76	5.21	5.89	5.28
CD58	3.64	2.99	4.39	1.96	3.5	3.67	3.18	1.99	3.44	3.39	3.12	4.44	2.41	4.1	2.59	2.55	4.05	2.36	2.55	3.06	3.89	2.37	3.2	3.28	3.22	3.7	3.62	3.92	3.94	2.81	3.57	3.09	3.76	2.95	NA	NA	NA	NA	NA	NA	NA	NA	NA	NA	NA	NA	NA	NA	NA
CD59	7.24	7.98	7.8	6.58	6.91	8.24	7.39	7.73	7.61	7.29	7.17	7.47	6.68	7.47	6.28	7.27	6.68	7.24	6.31	7.75	7.37	7.08	7.15	7.47	7.8	6.35	6.24	7.61	7.47	7.47	7.39	7.98	7.43	6.77	8.29	8.52	8.12	8.43	8.08	8.25	8.36	8.03	8.18	8.24	8.36	8.36	8.12	7.57	8.03
CD6	1.99	4.11	3.14	2.44	3.19	2.94	4.38	3.29	4.09	4.54	3.84	2.85	3.16	3.58	3.95	3.9	3.36	3.29	3.93	3.68	3.65	2.81	3.35	3.93	2.98	5.42	3.41	3.68	2.53	3.4	3.92	3.35	3.76	3.4	4.88	3.62	4.54	3.51	5.28	4.07	4.06	3.93	3.72	3.98	3.75	2.48	2.65	4.66	4.36
CD70	2.38	2.52	4.21	5.51	3.73	3.67	3.74	3.72	3.67	4.09	3.69	4.24	4.29	4.43	3.24	4.7	5.53	4.41	4.66	3.68	2.69	4.64	4.14	3.5	4.18	3.96	4.12	3.53	3.69	4	3.06	4.24	4.47	5.27	4.71	3.88	3.67	5	4.39	4.23	3.46	4.94	4.35	4.77	3.89	4.59	4.87	4.48	5.01
CD74	9.94	9.09	9.94	10.38	9.09	10.38	9.47	10.38	9.94	9.69	10.38	9.47	9.24	10.38	10.98	10.38	9.24	10.98	8.78	10.38	10.38	10.38	9.69	9.24	10.38	10.38	10.38	10.38	10.38	10.38	10.38	10.38	9.94	8.34	10.09	9.68	10.51	10.09	10.09	10.51	10.51	10.09	10.09	10.09	10.09	10.51	10.51	9.68	10.51
CD79B	4.22	4.02	4.66	5.25	4.77	5.45	5.22	5.3	4.64	4.54	4.91	5.38	6.15	6.35	5.58	6.11	7.04	5.03	5.12	5.49	6	6.76	5.85	4.56	5.3	4.85	4.89	5.49	5.4	4.69	5.45	4.93	5.68	5.56	5.33	4.72	5.17	6.45	5.61	5.21	5.75	6.33	5.55	5.69	5.57	5.68	5.68	6.64	7.1
CD80	3.83	3.54	4.5	3.27	3.73	3.52	1.59	3.95	4.18	3.73	3.44	3.99	4.47	2.8	4.18	3.17	3.36	4.86	3.93	3.06	3.11	3.41	3.35	3.7	4.04	3.4	3.9	3.53	3.76	3.55	3.06	3.5	3.96	3.84	4.25	4.36	4.72	4.29	4.03	4.94	4.23	4.27	3.9	4.08	4.63	3.97	4.14	5.24	4.77
CD81	8.78	8.44	9.24	8.86	8.56	9.47	8.93	9.94	9.69	8.56	9.69	10.38	8.67	9.47	8.93	9.24	7.92	9.47	7.02	9.94	9.69	9.47	9.09	8.78	9.94	7.86	7.18	9.69	8.93	8.93	9.69	8.67	9.01	6.38	8.8	8.18	8.61	8.92	8.7	9.1	9.02	8.8	8.92	9.18	8.92	8.92	8.43	7.6	8.52
CD82	2.82	4.18	3.7	3.56	4.05	3.24	2.36	2.82	2.92	2.71	3.69	2.07	3.89	2.6	4.18	3.09	2.13	3.1	4.66	3.38	3.89	3.14	2.92	3.28	3.22	3.96	2.92	1.84	3.29	2.57	3.29	2.62	3.96	2.36	4.16	4.72	3.91	3.07	3.87	3.08	4.23	4.08	3.3	3.87	3.47	3.82	3.84	3.49	3.3
CD83	5.19	4.4	6.49	6.21	4.87	5.08	5.22	5.14	5.77	5.87	5.78	5.89	5.84	7.09	5.25	7.17	5.71	7.75	5.12	7.08	5.24	6.72	5.51	5.38	6.5	5.4	4.78	5.31	6.94	6.05	5.94	6.48	6.4	5.88	6.52	5.17	6.32	6.63	5.48	5.96	5.81	6.92	6.57	6.77	6.51	6.24	6.47	7.52	6.57
CD86	5.38	4.5	5.06	5.92	5.63	4.98	3.95	3.95	4.56	4.09	3.84	2.85	7.35	5.92	4.18	5.08	5.6	4.53	6.68	4.61	3.65	4.64	6.03	4.43	3.22	4.2	6.61	2.62	4.53	5.22	3.92	6.04	4.14	6.36	4.88	3.62	5	5.06	5.2	4.84	4.68	5.12	5.22	5.02	4.63	5.44	4.8	7.76	6.04
CD8A	3.94	3.73	3.14	3.44	4.66	3.46	3.18	2.82	2.92	3.73	3.12	3.48	3.89	3.41	4.41	3.51	3.36	3.72	3.4	2.53	3.11	3.63	3.35	4.14	3.22	4.85	4.61	2.62	3.11	3.08	3.29	3.43	3.12	4.39	1.59	5.01	4.54	3.51	5.08	3.94	4.23	4.31	3.72	4.19	4.35	3.82	3.52	5.24	4.36
CD8B	3.32	1.65	2.8	3.06	2.37	2.35	3.5	2.82	3.44	2.71	2.67	3.48	3.16	3.58	0.77	3.32	3.87	3.53	1.92	3.68	3.89	2.62	2.74	2.46	2.65	2.39	3.06	3.12	2.78	3.18	2.36	2.07	1.73	2.36	4.39	4.09	4.36	4.6	4.7	4.29	3.88	4.27	3.72	5.22	4.68	4.75	4.22	4.05	4.53
CD9	5.31	5.94	5.71	4.58	4.3	5.19	5.65	6.63	6.5	5.08	6.58	5.38	3.67	3.94	4.18	5.32	3	4.29	5.75	6.03	6.26	3.89	4.63	5.16	6.45	3.96	4.12	6.11	5.4	5.22	6.11	4.95	5.19	3.84	6.96	5.91	6.02	6.34	5.28	6.87	6.64	5.76	6.48	6.99	7	6.77	7.25	3.49	4.28
CD97	3.83	2.99	5.22	3.94	3.19	3.94	3.18	4.24	4.64	4.09	4.95	5.04	3.42	4.25	0.77	4.44	3.67	4.78	4.32	5.42	3.11	4.39	3.89	2.46	5.21	2.39	3.15	4.73	5.12	4.1	3.77	4.01	4.72	3.33	NA	NA	NA	NA	NA	NA	NA	NA	NA	NA	NA	NA	NA	NA	NA
CD99	6.72	6.77	8.24	6.75	5.15	7.92	7.75	8.01	7.8	7.2	7.78	8.67	6.11	7.98	8.14	7.92	6.21	8.78	5.12	8.14	8.05	8.67	7.61	6.6	8.44	5.57	5.73	8.05	7.8	6.77	8.05	7.66	8.05	5.29	7.19	6.29	7.34	7.26	7.29	7.55	7.48	7.4	6.96	7.66	7.21	7.66	6.85	6.29	6.86
CDH5	7.61	8.24	7.15	7.03	7.35	8.05	7.13	6.85	7.04	7.56	6.95	7	6.6	6.08	6.07	6.68	6.94	7.35	7.43	6.96	6.57	7.71	7.09	7.92	6.56	5.81	6.22	7.24	6.7	6.71	7.17	6.56	6.07	6.44	5.83	6.3	5.5	5.81	5.87	6.35	5.52	5.16	5.62	5.28	5.76	6.08	4.96	5.89	6.14
CDKN1A	5.71	5.58	5.96	5.51	5.58	5.73	5.63	5.88	5.37	6.07	5.21	5.74	6.81	5.23	5.58	4.66	5.86	5.45	5.5	5.26	5.24	5.37	6	5.98	6.01	5.3	6.53	5.31	5.48	6.51	5.07	6	6.14	6.14	5	5.81	5.87	5.25	6.06	5.96	5.18	5.67	4.9	5.56	5.19	5.58	5.81	6.21	5.71
CEACAM1	4.66	4.27	3.84	4.17	2.83	4.13	4.67	5.49	4.28	4.09	4.72	5.82	3.16	4.25	4.68	3.83	2.56	4.14	3.4	4.53	5.51	3.26	4.21	5.07	5.78	3.4	4.63	4.48	4.35	3.69	4.28	4.45	3.47	4.29	5.15	4.72	5.56	5	3.69	4.76	4.97	4.87	4.08	5.6	4.93	4.82	5.74	4.05	4.83
CEACAM6	2.38	2.52	3.39	3.44	3.91	2.56	1.59	2.82	3.83	2.71	1.73	3.18	3.42	2.92	2.59	2.71	3.36	3.89	3.4	3.06	3.11	3.89	2.74	2.83	2.34	3.4	2.92	2.89	1.49	3.3	1.8	2.54	3.62	1.22	3.98	3.25	3.91	4.06	3.87	3.97	4.06	3.93	4.35	3.87	4.58	4.68	3.91	4.48	4.36
CEACAM8	3.18	2.99	3.39	4.28	3.19	3.16	3.18	4.51	2.92	3.39	2.67	2.85	3.42	3.81	4.18	3.42	3	4.14	3.4	3.19	4.67	4.74	4.32	3.5	3.42	4.56	3.94	4.03	2.78	2.81	3.29	3.4	3.32	3.64	3.16	3.88	3.31	3.28	4.66	3.33	4.23	4.01	4.08	3.1	3.47	3.64	3.84	4.05	4.36
CEBPB	4.06	5.23	5.37	3.94	3.73	4.48	5.22	6	5.4	4.09	4.72	4.44	4.29	4.71	4.41	3.94	4.05	3.53	4.32	4.43	4.67	4.07	4.81	5.01	3.78	3.96	3.62	4.48	5.4	4.63	4.45	4.58	4.87	4.12	5.33	5.34	4.88	4.86	4.9	5.18	5.57	5.24	4.49	5.34	4.8	5.25	5.1	4.05	5.39
CFB	5.58	5.23	5.42	4.71	4.05	4.77	5.17	5.14	4.7	5.22	5.09	4.92	4.07	4.85	4.18	5.08	3.36	5.85	3.93	5.78	5.42	4.3	3.99	4.87	5.02	5.05	4.24	5.04	5.12	5.34	4.97	4.38	5.74	4.16	6.74	6.37	7.39	5.89	6.81	5.7	6.91	6.42	6.42	6.73	6.24	5.16	7.4	5.24	5.69
CFD	3.18	3.73	3.14	4.5	3.5	3.73	3.74	4.51	3.67	3.6	2.83	3.48	4.07	3.17	4.95	2.84	4.05	2.65	5.81	3.84	4.86	2.16	3.52	2.46	3.78	4.2	4.55	4.03	3.2	2.81	4.13	3.61	2.7	5.23	4.95	4.77	3.91	3.28	3.98	4.25	4.85	3.01	2.87	2.9	2.84	4.07	4.73	4.48	3.91
CFH	6.3	5.79	7.03	5.75	5.04	7.8	6.84	8.39	7.26	6.9	7.51	8.29	6.43	7.35	6.28	7.86	7.04	7.06	5.24	7.17	7.68	6.45	5.85	6	7.17	4.56	5.51	7.71	7.75	7.98	8.44	5.93	8.44	5.51	6.82	5.79	7.12	7.83	8.18	6.68	7.52	7.45	6.52	6.81	7.07	7.29	6.68	6.77	7.45
CFI	4.22	4.11	2.8	3.94	3.5	4.48	2.36	4.85	3.83	4.33	3.69	3.48	3.67	3.41	2.59	4	4.24	3.29	4.16	3.68	3.89	2.62	3.74	3.7	3.78	3	4.19	3.79	3.84	4.73	4.71	4	3.47	4.45	7.89	6.58	7.78	7.37	7.24	7.28	7.78	7.81	7.89	8.18	7.78	7.78	7.85	6.29	7.74
CFP	1.99	2.99	2.8	3.06	3.73	3.82	3.74	2.82	3.67	2.71	2.67	1.3	3.67	4.43	3.69	3.94	4.05	3.1	3.93	3.68	2.69	3.98	3.52	3.5	3.42	2.39	3.06	3.68	2.78	3.08	3.92	2.76	3.96	3.7	3.33	3.62	3.31	4.06	4.18	4.04	3.88	4.27	4.35	2.33	3.13	3.42	3.52	3.76	4.77
CHUK	4.26	4.27	4.72	4.28	4.18	4.83	4.13	5.49	4.56	3.73	5.3	5.5	3.42	4.1	5.39	4.96	4.05	4.66	3.07	4.61	4.67	4.39	4.41	4.63	4.41	3.4	3.82	4.92	4.6	4.26	4.97	4	4.87	3.74	6.43	5.37	5.73	5.57	5.43	5.96	5.84	5.82	5.62	6.18	6.2	6.12	6.12	5.83	5.28
CIITA	5.15	5.25	4.5	4.66	5.73	4.36	4.83	4.24	4.28	4.8	4.41	3.99	4.63	3.17	3.24	4.86	3	4.66	6.08	4.19	5.24	3.89	3.2	3.5	4.18	5.45	3.82	4.03	3.69	4.32	4.05	3.95	3.96	2.72	4.58	5.71	4.54	3.67	4.52	4.68	4.8	2.81	3.9	4.66	4.3	4.59	4.04	3.05	3.62
CISH	3.42	3.31	3.7	4.71	5.87	4.25	3.5	3.95	4.09	2.23	3.84	3.74	5.55	3.17	3.24	3.42	3	3.53	5.84	2.83	3.11	3.63	3.89	4.14	3.92	3.4	4.86	3.68	3.94	4.04	4.52	4.04	3.47	5.42	5.28	6.58	5.35	4.54	5.5	5.91	4.8	4.94	6.2	5.34	5.24	5.62	5.17	5.63	5.39
CLEC4A	3.18	3.92	2.1	3.27	1.49	3.09	3.5	2.82	2.92	3.1	3.44	2.85	3.16	3.17	1.76	3.51	4.55	3.89	3.07	3.38	1.54	3.41	3.52	2.83	3.22	4.2	4.31	2.62	3.94	2.96	3.29	3.4	3.76	3.2	4.45	3.88	4.29	4.06	2.7	3.58	4.13	4.42	3.9	4.31	4.08	3.42	4.04	4.05	4.28
CLEC4E	3.42	4.79	2.45	2.44	2.83	0.92	3.18	5.14	3.44	3.39	3.12	3.48	3.16	3.17	1.76	2.55	3.67	3.29	3.4	4.32	4.67	2.62	2.37	5.64	3.78	4.2	2.78	4.03	3.39	2.81	2.63	2.85	2.36	2.95	2.41	4.23	3.91	3.61	2.7	4.29	3.07	3.57	2.87	2.9	3.13	3.64	3.52	3.49	3.72
CLEC6A	3	3.73	2.45	1.96	3.91	2.62	3.5	2.82	3.22	2.23	3.33	3.18	3.89	2.92	4.18	2.41	3.67	3.29	4.9	2.2	3.11	4.23	2.92	4.14	3.92	2.39	1.54	3.53	2.97	2.81	3.29	2.85	3.32	3.2	3.98	4.09	3.31	4.23	3.62	3.5	3.22	3.93	4.35	4.08	4.35	4.29	3.01	4.3	3.72
CLEC7A	3.42	3.54	3.84	5.47	4.84	4.02	4.13	3.95	3.97	3.39	2.83	4.24	4.86	5.06	4.68	3.72	4.55	2.65	5.38	4.61	5.24	4.07	5.09	4.14	3.42	4.96	5.59	3.79	4.26	4.47	4.45	5.14	3.62	5.37	5.43	4.85	4.54	4.96	4.8	4.62	5.21	5.34	5.07	5.02	4.84	5.09	4.04	4.66	5.65
CLU	2.61	2.52	3.14	3.82	4.05	3.4	2.36	3.72	3.44	3.1	3.69	3.99	2.83	3.17	2.59	4.21	4.55	4.66	3.07	2.83	2.18	2.97	3.52	3.93	3.42	3.7	3.41	4.16	2.53	3.46	3.92	3.28	3.62	3.64	5.04	4.09	4.72	4.96	4.39	5.11	5.52	4.87	5.55	6.01	5.12	4.68	5.38	4.84	4.53
CMKLR1	4.33	4.58	4.95	3.06	4.71	4.53	4.13	2.82	4.28	4.09	4.29	3.48	3.16	3.58	3.69	4.16	3.87	5.03	3.07	4.32	4.44	4.15	3.35	3.7	4.04	3.4	4.19	4.85	4.67	4.26	4.28	4.8	3.62	4.97	4.16	5.37	4.44	4.06	4.39	4.11	4.75	4.21	4.35	4.19	4.74	4.38	4.96	3.49	4.68
CR1	6.03	6.45	3.55	4.9	4.77	4.95	6.26	4.68	5.22	5.49	5.52	6.34	4.74	4.92	4.68	5.27	5.43	5.32	4.9	4.32	4.44	5.46	5.55	6.03	5.93	6.25	4.84	6.51	4.26	4.04	5.64	5.04	4.58	4.24	4.64	3.62	4.62	5.53	4.98	4.62	4.8	5.04	4.35	5.15	4.74	4.07	4.67	4.05	5.21
CRADD	6.1	6.91	5.96	7.31	6.81	6.61	6.57	6.1	5.84	7.8	5.72	6.07	8.34	6.68	8.05	6.26	7.8	6.48	7.17	5.49	5.42	6.69	7.98	7.66	6.01	6.77	8.14	6.64	5.75	6.33	6.6	6.23	6.32	7.1	6.91	7.24	7.06	7.34	6.64	7.15	6.81	7.24	7.62	7.19	7.37	7.48	6.6	8.61	7.95
CSF1	6.14	6.94	5.22	4.83	5.78	6.17	5.42	4.98	4.87	6.13	5.88	4.92	3.67	4.34	5.39	4.28	3	5.22	3.07	4.71	6	5.37	3.89	6.5	5.1	5.74	4.74	5.28	4.8	5.31	4.28	4.69	4.47	3.56	5	6.35	4.96	3.93	4.94	4.97	4.8	3.23	4.08	4.31	3.82	3.82	4.6	3.76	3.72
CSF1R	4.74	3.92	5.02	4.4	3.73	4.1	4.27	3.52	5.32	4.92	4.41	3.48	3.16	4.1	3.69	5.66	4.24	4.53	5.03	4.32	3.39	4.48	3.74	3.7	2.65	4.4	4.12	3.68	5.3	4.1	3.47	5.26	4.34	4.29	5.04	5.46	5.31	4.54	5.43	5.19	5.32	4.82	4.98	4.87	4.93	4.68	4.8	4.48	4.28
CSF2	3.64	2.52	2.45	3.94	2.37	3.24	2.36	3.72	2.46	3.39	2.67	2.85	3.89	3.17	3.69	3.42	5.21	2.36	3.4	3.06	2.69	2.62	3.35	3.28	2.65	3.4	4.71	3.4	2.34	3.76	3.57	3.46	3.32	4.7	3.49	2.61	3.67	3.85	2.95	3.07	3.07	3.43	3.72	3.87	3.63	3.23	3.69	4.48	4.11
CSF2RB	5.22	5.72	5.53	7.51	5.97	5.93	5.04	5.4	6.37	6	5.59	6.25	7.66	6.75	6.53	6.63	7.47	6.69	7.39	6.71	5.7	6.98	7.56	6.66	5.1	4.56	7.24	7.86	6.16	6.42	6.85	6.75	6.66	7.08	5.43	5.12	5.56	6.82	6.72	5.19	5.75	6.08	6.27	5.79	6.24	6	5.79	7.65	7.34
CTLA4_all	3.18	2.52	2.8	3.7	5.43	4.13	4.27	3.52	3.22	2.71	3.33	3.18	4.86	3.71	3.69	4	4.84	4.29	4.78	3.38	4.44	4.15	3.52	4.43	2.98	4.2	4.24	4.65	4.26	4.04	3.29	4.28	3.32	5.5	3.16	4.23	4.21	4.06	3.87	3.94	3.46	4.08	3.3	3.3	3.31	3.64	3.52	4.48	4.36
CTNNB1	6.75	8.14	5.98	5.69	5.84	7.24	7.08	6.85	6.56	6.14	6.47	7.04	5.5	5.57	6.42	5.94	4.99	6.23	6.54	6.25	6	5.54	5.85	6.75	6.45	7.08	5.51	6.98	6.05	6.03	6.4	5.41	6.44	4.24	6.64	7.51	6.48	6.35	6.38	6.83	6.8	7.07	6.37	7.09	7.18	7.31	6.53	5.11	5.94
CTSC	4.89	4.02	5.15	3.27	4.05	4.8	3.18	4.51	4.09	4.09	4.84	3.18	3.42	4.85	3.24	4.28	2.56	3.89	3.07	3.96	3.89	2.16	2.58	3.7	2.98	5.3	3.51	3.12	5.71	5.66	4.2	5.12	6	2.36	7.54	7	7.47	7	7.19	7.35	7.19	7.12	7.17	7.29	7.41	6.99	6.87	6.35	6.73
CTSG	2.61	3.73	2.45	3.06	1.49	3.46	4.38	3.52	2.46	3.6	3.94	2.07	3.16	3.17	3.69	3.09	3.87	3.89	3.68	2.2	4.44	4.48	2.58	3.93	3.22	2.39	3.06	3.12	3.11	2.02	3.06	2.54	3.47	3.47	4.16	3.62	3.67	4.16	2.95	4.23	3.07	3.57	4.35	3.46	3.31	3.64	1.87	4.3	4.03
CTSS	6.03	5.48	6.35	5.12	4.84	4.61	5.35	5.94	6.64	6.45	6.63	4.84	5.05	5.92	3.95	6.24	5.21	5.38	4.66	6.28	5.51	5.37	4.07	6.27	6.21	7.1	4.98	5.31	6.81	5.74	4.2	7.75	6.04	4.48	4.83	5.82	5.77	5.65	6.22	4.75	5.75	5	4.49	5.34	5.24	4.29	4.91	5.11	5.6
CUL9	5.35	5.44	4.95	4.28	4.59	5.09	5.52	5.58	5.47	4.33	5.12	5.89	5.12	3.41	3.24	4.96	3	5.78	4.66	5.54	5.51	5.23	4.81	4.72	5.58	4.85	4.27	5.6	4.42	3.83	5.4	3.66	5.14	3.92	6.24	5.58	6.62	6.14	5.97	6.49	6.06	6.26	6.74	6.59	6.72	6.26	6.42	5.5	5.49
CX3CL1	6.84	7.02	5.89	5.54	7.51	5.53	7.71	6.72	7.02	7.1	6.32	5.74	5.65	6.28	5.39	5.73	4.55	5.12	5.65	5.78	6.76	6.2	5.24	7.17	6.95	4.85	5.75	6	4.6	6.01	6.85	5.56	4.65	4.2	6.12	6.02	6.38	5.06	5.96	6.68	6.34	5.58	6	6.07	6.24	6.18	6.5	3.49	4.36
CX3CR1	3.42	3.73	3.7	1.96	3.73	3.4	4.13	4.85	3.67	3.1	3.12	3.48	3.67	3.81	4.95	2.71	3.67	3.53	4.48	3.19	4.24	3.41	3.99	0.92	2.34	1.43	3.25	3.53	2.34	2.57	1.8	3.35	3.62	3.4	3.68	3.88	4.1	3.4	4.18	3.53	4.23	3.78	3.3	3.59	3.89	2.84	4.14	3.49	4.89
CXCL1	4.44	3.73	4.04	4.97	4.05	5.37	3.74	5.4	3.67	4.09	3.53	3.99	4.18	5.06	4.95	4.5	4.99	4.01	4.78	5.03	4.86	3.63	4.95	3.28	2.65	5.36	5.03	5.19	4.93	5.43	4.45	3.84	4.34	5.66	4.88	4.77	5.73	5.39	6.55	3.92	5.57	5.21	5.62	5.02	5.39	4.82	4.46	5.24	5.21
CXCL10	4.37	3.54	4.04	3.44	3.73	4.41	4.13	3.95	4.75	6	6.69	3.48	4.29	3.94	3.69	6.84	4.99	2.36	4.16	5.03	3.39	4.23	4.07	3.5	5.51	4.2	4.27	5.28	4.67	4.53	4.05	3.76	4.24	4.64	5.39	4.54	4.44	5.39	5.43	5	4.97	5.51	4.49	4.4	4.8	4.38	5.63	5.63	5.07
CXCL11	3.42	2.52	3.39	1.07	3.5	2.73	3.74	3.29	3.67	4.09	5.21	3.18	2.83	2.6	3.24	4.5	2.56	4.14	1.3	3.19	3.11	3.52	3.09	3.28	3.92	4.85	3.33	3.4	3.47	2.81	3.29	2.85	3.96	3.07	4.39	3.62	2.88	4.4	4.48	4.62	3.81	3.43	3.9	3.46	4.35	4.18	4.53	4.05	4.53
CXCL12	4.72	4.87	4.6	2.76	4.53	4.29	4.13	5.3	3.97	5.08	4.5	4.24	2.41	2.8	3.24	3.72	2.13	3.89	3.68	3.38	5.24	2.37	4.14	3.5	4.52	4.4	2.55	2.89	5.27	4.73	4.52	4.13	5.08	3.27	8.52	6.77	8.52	9.18	7.34	8.86	8.24	8.08	8.43	8.61	8.7	8.29	8.08	7.01	8.36
CXCL2	3.83	3.31	3.55	3.44	3.73	2.94	2.8	3.29	3.44	3.73	3.12	2.07	2.83	3.58	2.59	2.25	2.56	3.29	2.55	2.83	4.07	3.14	3.74	3.28	2.98	4.4	3.94	4.03	3.76	4.37	3.67	3.79	2.36	4.45	4.71	4.36	4.44	4.49	4.62	4.49	4.63	3.82	5.37	3.59	4.27	4.48	4.67	5.11	5.07
CXCL9	2.82	2.52	4.13	3.7	2.83	3.24	4.13	4.24	3.67	4.54	8.56	2.85	3.67	3.94	5.58	6.44	3.67	4.01	3.4	4.53	3.89	3.89	2.92	3.09	6.21	3.7	3.62	5.64	4.88	3.83	3.06	4.26	4.87	4.54	4.83	3.62	3.67	4.49	4.74	4.49	4.38	4.46	4.7	3.77	3.82	3.97	4.39	5.24	4.89
CXCR1	2.82	3.73	2.45	3.44	5	3.73	2.36	2.82	1.7	3.1	2.83	4.65	2.83	3.58	4.41	3.32	4.67	3.53	6.07	3.68	3.11	3.26	5.55	3.5	3.61	3.4	5.31	3.26	3.6	3.62	3.67	4.2	3.32	6.01	3.83	3.62	3.31	5	4.18	3.83	4	4.54	4.49	3.59	4	4.48	4.14	5.74	4.96
CXCR2	4.1	3.31	4.21	3.56	4.87	4.27	3.95	3.29	3.83	4.92	3.69	2.85	5.21	3.81	3.24	4.04	6.08	4.86	5.43	4.9	4.24	5.54	5.43	4.94	4.28	2.39	4.89	4.56	3.94	3.76	4.45	4.38	4.87	5.09	4.95	3.88	3.67	4.64	4.87	5.06	4.85	5.47	5.15	5.22	4.52	5.44	4.67	5.89	6.04
CXCR3	3	2.52	3.55	2.44	4.05	2.62	3.5	2.82	4.09	3.86	3.12	3.18	4.18	3.71	3.69	3.83	3.87	4.14	4.16	2.83	3.89	3.26	3.74	3.09	2.65	4.4	2.78	4.16	3.47	3.08	3.29	2.92	2.36	3.13	4.07	4.23	4.88	4.54	4.98	4.57	4.72	4.36	4.49	2.9	4.35	4.68	4.73	4.05	4.83
CXCR4	3.42	3.73	4.5	4.9	4.05	3.7	3.5	2.82	4.18	4.09	4.72	4.24	3.42	4.34	3.24	3.94	4.24	4.53	3.68	4.19	3.39	3.76	3.67	1.92	2.98	4.7	3.62	3.79	5.12	4	4.52	4.78	2.7	4.29	4.95	5.1	4.54	4.69	5.05	5.16	4.75	4.18	5.22	5.56	5.19	4.94	4.6	4.48	4.19
CXCR6	3.18	4.4	3.55	3.06	3.19	3.6	4.13	3.29	4.09	3.1	3.69	3.48	2.41	4.43	4.18	3.66	4.05	2.9	2.55	3.51	3.11	4.15	4.21	3.5	3.42	3	4	2.89	4.11	4	3.92	3.21	2.7	4.82	4.64	4.82	4.72	4.69	4.8	4.62	5.02	4.84	4.98	4.81	4.52	4.48	4.6	5.5	5.46
CYBB	5.85	5.04	5.55	4.5	4.94	4.55	4.91	4.68	5.62	5.83	5.96	3.18	4.74	6.41	4.41	6.94	4.84	5.12	6.36	5.03	4.67	4.23	4.07	5.51	5.78	5.48	5.09	3.68	6.72	5.84	4.2	6.87	5.5	5.31	5.39	6.74	6.22	5.48	6.18	5.37	5.57	5.34	4.8	4.72	6.02	6.47	5.38	5.74	5.41
DEFB1	3.75	3.31	3.96	3.56	3.19	3.82	3.5	3.95	3.22	3.6	2.44	5.04	4.74	5.16	4.18	4.16	4.99	3.53	4.16	4.53	3.89	4.64	4.48	4.43	3.61	4.56	3.72	3.53	3.47	3.55	4.28	3.74	4.47	4.18	7.43	6	5.66	7.14	5.57	7.12	6.57	6.45	6.86	7.31	6.9	6.64	6.99	6.41	6.6
DEFB103A	3.53	3.73	4.21	5.42	4.18	4.93	4.13	4.68	4.18	4.33	3.53	4.92	4.86	5.23	4.95	4.16	6.44	3.89	5.47	4.71	4.44	4.74	4.41	5.16	2.98	4.85	4.67	4.99	3.2	3.46	4.97	4.65	3.62	5.6	4.51	3.88	4.36	5.22	4.7	4.43	4.23	6.03	5.29	4.87	4	3.97	4.39	5.11	6.81
DEFB103B	1.07	3.31	3.14	1.07	1.49	1.99	1.59	0.92	2.46	3.6	2.44	1.3	2.41	2.92	1.76	1.54	1.37	1.54	2.55	2.53	2.18	1.84	1.07	2.83	2.34	2.39	0.62	1.84	2.97	2.81	1.8	3.16	3.76	1.22	4.16	4.23	3.91	3.93	4.06	4.62	3.07	5	4.61	4.87	4.52	4.18	3.69	4.48	4.11
DEFB4A	3.18	3.31	3.14	3.44	3.5	3.4	3.18	2.82	2.92	3.1	1.73	3.74	4.18	2.6	3.24	2.92	3	2.02	3.93	3.68	3.39	3.76	2.74	2.46	3.92	2.39	2.92	4.03	2.78	3.4	3.92	3.28	3.12	4.35	3.68	2.61	3.91	4.16	3.51	4.47	3.65	5.04	4.7	3.46	3.13	4.38	4.14	4.66	5.28
DUSP4	3.83	4.5	3.84	5.34	4.77	4.71	4.96	3.95	3.67	4.62	4.01	4.84	5.76	5.57	5.87	5.08	6.87	4.94	5.73	4.61	3.89	5.78	4.71	4.83	4.52	5.78	5.3	4.85	4.48	4.37	5.07	4.71	5	5.76	4.51	5.22	4.36	5.13	5.05	4.66	4.92	5.4	5.37	4.66	4.68	5.21	4.87	4.98	6.12
EDNRB	3.75	5.01	3.84	4.9	3.5	3.94	4.83	3.72	3.44	3.86	2.2	3.74	5.71	3.17	4.41	3.66	4.84	3.29	5.24	1.65	4.07	3.52	4.71	3.5	4.18	4.4	5.12	1.84	2.78	4.16	3.77	4.2	2.92	5.17	5.36	5.95	4.88	4.73	4.62	5.17	4.8	4.94	4.35	5.22	5.59	4.82	5	4.48	4.46
EGR1	6.41	5.36	6.99	6	5.3	6.38	5.35	6.45	5.84	7.35	8.14	6.79	5.12	7.41	7.43	5.54	6.68	6.88	5.24	6.49	7.51	5.87	5.85	5.01	6.05	6.85	5.28	6.34	7.66	8.34	5.94	7.71	6.92	5.48	6.4	7.34	5.77	6.69	6.95	5.74	7.09	6.2	8.61	7.22	7.63	6.49	7.31	6.94	5.97
EGR2	4.01	2.52	3.55	3.94	4.66	4.33	2.8	3.29	3.83	3.6	3.84	5.38	4.07	3.94	3.24	3.17	3.36	3.29	3.4	3.38	4.07	2.37	3.89	3.7	3.42	3	4.81	3.4	3.2	4.1	3.06	3.79	3.32	4.6	4.25	4.9	4.21	3.79	4.03	3.83	3.34	4.15	5.15	4.46	3.13	4.48	4.04	4.66	4.19
ENTPD1	6.94	6.51	6.62	6.94	7.2	6.14	6.14	5.49	5.22	6.69	5.52	6.17	6.54	7.26	7.98	5.54	7.66	6.33	8.44	5.35	4.44	5.7	6.76	5.95	4.94	6.81	8.56	6.34	6.22	7.86	6.66	7.43	6	8.44	5.93	7.31	7.51	6.43	6.88	7.34	6.17	6.57	7.37	6.42	6.7	7.07	5.97	6.64	7.59
EOMES	3.32	4.11	3.14	3.94	3.73	3.24	3.74	3.29	3.83	3.1	3.12	2.85	4.29	1.99	4.68	1.54	3.36	2.9	4.48	2.83	3.11	3.98	3.67	3.7	4.04	4.96	4.31	2.89	3.2	2.57	2.82	2.54	3.12	4.12	NA	NA	NA	NA	NA	NA	NA	NA	NA	NA	NA	NA	NA	NA	NA
ETS1	6.5	6.42	6.69	5.34	6.13	6.86	6.62	6.34	5.47	6.79	6.66	6.58	4.86	5.85	6.35	6.38	5.43	6.41	5.31	6.09	6.63	5.78	5.78	5.75	6.4	5.17	5.81	6.21	6.22	6.94	6.54	6.94	5.6	5.81	5.72	5.93	5.63	4.45	6.2	5.85	4.75	4.69	4.19	5.54	5.62	5.44	4.8	4.66	5.21
FADD	4.3	4.44	4.3	4.05	3.5	4.33	4.27	3.29	4.4	3.86	4.5	4.84	3.67	3.17	4.18	3.72	4.05	3.53	3.93	5.03	4.86	3.98	4.21	4.14	4.28	4.2	4.42	4.39	4.18	3.94	4.85	4.28	3.12	5.04	5.28	5.44	5	4.69	4.28	5.42	5.37	4.98	4.61	4.56	4.74	4.98	5.06	4.84	4.28
FAS	3.75	3.73	4.86	3.82	4.47	4.41	4.96	3.72	3.67	3.73	3.44	3.99	4.63	4.71	5.25	4.09	4.99	4.86	3.68	4.19	4.07	3.26	5.33	3.5	4.18	4.4	3.72	4.73	4.8	4.32	4.97	4.31	2.92	5.07	5.23	4.36	4.36	4.23	4.52	4.39	4.68	4.46	4.7	4.56	4.52	4.75	4.14	4.84	4.83
FCAR	1.99	3.31	1.7	3.06	3.73	2.35	2.36	2.82	2.46	2.23	2.67	3.18	1.49	0.77	3.69	2.71	3.36	2.36	1.3	3.38	0.77	3.14	3.67	1.92	3.22	3	2.55	3.12	3.2	2.81	2.82	2.37	2.36	3.81	3.16	3.88	3.67	2.48	2.33	3.7	2.61	2.61	2.87	2.53	2.24	1.38	1.17	4.3	3.43
FCER1G	5.98	4.98	6.96	5.19	4.71	3.82	4.87	6.34	7.47	5.49	6.26	3.74	4.07	6.08	5.58	7.59	3.36	5.7	4.48	6.49	4.24	2.81	3.2	5.16	6.5	4.2	3.72	3.4	7.39	5.66	4.05	7.47	6.51	3.92	5.28	5.31	6.3	3.4	5.64	4.97	5.94	3.93	3.3	4.87	5.16	5.02	4.73	4.3	3.52
FCGR1A/B	4.06	3.92	3.39	5.12	5.04	4.29	2.36	3.29	2.46	4.09	3.44	3.18	5.37	5.06	3.95	4.37	5.71	3.89	5.38	3.84	4.24	3.76	5.12	4.94	3.22	3.7	5.42	4.48	4.55	5.1	4.97	4.72	3.62	6.07	5.23	4.23	4.29	5.62	4.28	4.67	4.52	6	5.84	4.95	5.49	5.72	5.38	5.5	4.89
FCGR2A	4.16	2.52	4.6	4.4	3.19	4.1	3.18	3.95	5.07	4.09	3.69	4.44	4.47	4.25	4.68	4.96	4.41	4.78	3.07	4.82	3.65	4.9	3.99	3.5	4.41	4.2	4.12	4.31	5.48	3.46	4.2	4.63	3.76	4.51	4.39	3.62	4.72	5.17	5.11	4.64	5.25	5.67	4.35	4.72	4.89	4.89	4.46	5.36	4.96
FCGR2A/C	4.18	4.18	4.6	3.7	4.18	4.41	4.45	4.98	4.64	4.71	5.05	4.44	4.29	6.08	4.18	5.51	5.6	4.66	4.16	5.93	2.69	5.78	4.56	4.63	4.62	4.78	4.42	4.16	5.61	4.58	5.49	5.38	4.72	5	6.23	5.86	5	5.79	6.06	5.38	5.87	5.96	5.74	6.14	5.55	5.68	5.53	5.5	6.33
FCGR2B	1.07	2.52	3.14	1.96	3.5	2.35	2.8	3.29	3.22	1.3	3.69	2.52	3.67	3.71	4.68	2.92	2.13	2.9	3.07	2.2	3.39	3.63	2.74	2.46	3.61	3	2.55	2.62	1.49	2.02	2.36	2.69	3.12	2.46	2.41	4.46	4.21	2.74	4.18	3.53	3.34	3.11	3.9	2.9	4.08	4.29	3.01	4.66	4.11
FCGR3A/B	5.07	4.95	4.5	3.56	2.37	3.67	4.6	4.51	5.32	4.54	4.5	4.24	4.47	4.98	2.59	4.89	3	5.22	4.48	3.84	3.39	4.23	3.67	4.72	4.85	4.2	3.41	3.79	5.48	3.94	3.92	4.85	4.14	3.89	4.83	4.23	4.88	5.17	5.2	4.78	4.45	5.12	5.49	4.51	4.74	4.29	4.8	4.84	6.08
FCGRT	5.81	5.2	6.77	6.16	4.94	6.48	5.59	6.27	6.76	5.6	5.72	5.63	4.07	6.08	6.53	6.81	5.86	6.63	4.48	7.66	6.38	5.98	5.35	5.65	5.3	5.23	5.42	6.61	6.64	5.96	6.17	6.77	6.23	5.42	7.74	6.43	7.63	7.68	6.96	7.38	7.52	7.93	6.83	7.93	7.57	7.81	7.43	6.29	6.95
FKBP5	4.99	7.43	5.48	2.44	4.84	3.6	6.77	7.2	6.54	3.1	6.42	4.44	3.89	3.58	4.68	4.5	5.21	3.53	3.07	4.61	4.07	3.98	7.04	5.21	4.94	3.4	4.05	5.73	4.01	3.76	6.54	4.09	6	4.7	5.67	7.98	6.02	4.06	3.87	7.82	6.52	7.89	3.72	4.19	6.51	5.09	6.04	4.05	4.59
FN1	8.67	7.71	9.09	4.66	7.45	8.56	7.04	9.47	8.24	8.93	6.91	7.66	5.65	8.72	6.07	6.88	4.84	7.61	5.38	7.92	8.56	5.37	4.88	5.95	5.72	4.4	4.74	9.24	9.69	8.44	8.24	6.63	9.69	4.9	6.55	7.48	6.42	5.39	7.31	7.58	6.88	4.98	5.49	6.04	6.62	6.4	5	4.3	4.46
FOXP3	3.53	4.18	3.55	3.56	4.59	3.24	4.13	5.14	3.97	3.1	3.94	5.04	4.63	4.92	5.25	4.16	3.36	4.41	4.9	3.06	5.24	3.63	2.92	3.7	4.18	4.96	3.62	3.68	3.84	2.81	3.77	2.07	3.76	3.2	3.68	4.46	4.72	4.36	4.52	4.23	4.13	4.11	4.61	3.77	4.8	4.89	4.46	5.5	4.96
FYN	6.7	6.56	5.82	6.44	6.26	6.4	6.96	7.31	6.84	5.77	7.04	7.43	5.21	6.03	5.87	5.7	4.67	6.69	5.31	5.64	6.82	6.98	5.89	6.71	7.66	6.42	4.71	7.2	5.82	5.76	6.42	5.15	5.83	3.84	4.95	5.55	5.26	4.64	5.87	5.38	5.71	4.31	4.08	4.66	5.12	4.48	4.39	4.05	4.11
GATA3	4.13	5.29	4.79	4.5	4.77	4.95	4.74	4.85	4.28	3.39	4.58	4.65	3.89	3.81	4.68	3.42	4.05	4.14	5.47	3.68	4.86	4.23	4.32	4.94	4.18	4.7	4.67	4.48	3.94	4.2	3.92	3.74	3.47	4.6	4.39	5.17	4.1	3.79	3.34	4.89	4.31	3.87	3.9	4.46	4.27	5.54	4.8	5.5	3.72
GBP1	6.56	5.63	5.48	6.36	5.32	5.12	5.68	4.24	5.07	5.87	6	5.74	5.65	3.94	4.68	5.56	4.99	4.29	5.54	6.25	5.88	4.48	4.88	5.16	5.51	6.58	5.69	4.65	5.12	6.07	4.71	5.41	5.14	6.33	5.72	5.82	5.38	5.1	5.28	4.89	5.06	5.43	4.8	5.39	4.8	4.94	5.91	5.97	5.16
GFI1	3.75	3.73	3.96	6.29	6.71	5.06	4.45	4.51	4.09	3.86	4.2	5.16	6.9	5.44	6.71	4.92	7.2	4.01	4.16	4.82	5.01	5.54	6.39	4.51	2.98	6.54	6.58	4.99	4.64	5.56	4.88	5.53	4.87	7.56	4.45	5.17	5.63	5.28	5.45	5.23	4.8	5.47	5.78	4.72	4.8	6.29	4.31	7.26	6.01
GNLY	3.42	4.79	1.07	3.44	3.19	3.24	3.5	1.99	3.97	3.1	3.44	3.18	2.83	2.92	2.59	2.84	3	4.01	2.55	3.06	2.69	3.14	2.16	4.14	2.65	4.56	2.34	2.32	2.97	2.37	2.36	2.27	2.36	2.95	3.16	4.58	3.67	3.67	3.76	2.94	4.13	3.57	3.72	3.59	3.63	3.82	3.69	3.49	3.43
GP1BB	3.64	4.85	4.79	3.56	3.5	4.44	4.38	5.14	4.09	4.71	4.2	5.5	3.16	4.58	4.41	4.37	4.41	4.14	3.68	3.96	4.67	4.48	4.14	4.14	4.71	3.4	4	4.85	3.94	3.69	4.97	4.53	3.32	4.66	4.07	4.09	4.44	4.06	3.98	3.53	4.38	4.01	5.29	2.7	2.84	4.07	3.52	4.84	4.68
GPI	6.81	7.13	7.43	6.45	5.46	7.39	6.75	7.8	7.17	6.94	7.43	7.24	6.6	7.61	7.75	7.8	7.66	7.51	5.38	7.33	7.8	7.29	6.9	6.95	7.71	6.92	6.45	7.47	7.61	7.56	7.61	6.94	7.75	6.88	9.02	8.36	8.8	9.42	8.92	9.68	8.92	9.02	9.42	9.42	9.42	8.8	8.61	8.08	9.42
GPR183	5.91	5.95	6.14	7.1	7.89	6.14	6.69	5.58	5.69	5.6	5.4	5.5	7.17	6.5	7.22	5.41	7.04	5.12	7.24	4.53	5.24	5.64	7.47	6.37	5.1	7.04	7.66	5.78	5.57	7.31	6.49	7.2	5.83	8.24	6.6	7.63	6.87	6.58	6.53	6.98	6.19	6.45	7.34	6.14	6.85	6.9	6.18	7.65	6.44
GZMA	2.61	3.73	3.14	3.56	2.37	2.56	3.18	1.99	1.7	3.1	3.69	3.18	3.16	3.41	3.69	3.94	3.36	3.1	3.68	3.51	3.11	4.3	3.09	3.09	3.61	3.96	3.82	3.12	3.2	2.81	3.06	3.48	3.62	3.64	3.16	3.25	4.44	4.06	4.84	3.25	4.58	3.71	4.08	4.19	3.82	3.1	4.67	3.76	4.63
GZMB	3.32	3.92	2.45	3.44	3.73	3.52	3.18	3.52	3.67	3.39	4.09	3.99	3.67	4.34	4.68	4.58	3.87	2.02	3.68	2.83	3.39	4.64	3.89	3.93	3.78	3	3.94	4.65	3.39	2.81	3.92	3.53	3.32	4.08	4.71	4.63	3.31	4.96	3.87	4.45	4.45	4.46	4.61	4.51	4.58	4.29	4.67	4.66	5.07
GZMK	3.94	3.31	3.55	3.06	3.19	3.94	3.18	1.99	2.92	2.71	2.44	2.85	3.42	3.41	2.59	3.76	3.36	2.9	2.55	3.19	3.11	3.41	3.09	3.09	3.42	3.4	4.37	2.89	3.6	3.76	3.29	2.92	2.92	3.2	3.16	5.12	3.67	4.36	4.28	3.45	4.31	4.18	4.35	3.59	4.18	3.97	3.91	4.84	4.11
HAVCR2	3.42	3.73	4.04	4.05	4.66	2.94	3.74	3.72	3.97	3.39	2.44	4.24	3.16	3.17	3.69	3.51	2.56	2.9	3.4	2.83	3.65	2.62	2.92	3.93	3.22	3.4	3.72	3.4	3.39	3.46	3.06	3.9	3.12	4.85	5.28	4.98	5.43	4.64	5.05	4.11	4.52	5.34	4.19	5.44	5.67	5.49	4.91	5.11	4.36
HFE	4.61	4.4	3.55	3.94	4.98	4.41	3.95	3.29	4.18	3.6	3.12	3.74	4.47	3.71	3.24	3.09	4.41	3.29	2.55	1.65	2.69	3.26	4.81	4.51	3.42	6.35	5.66	4.16	3.39	4.69	3.77	4.49	3.47	5.71	4.77	4.46	4.29	4.06	3.51	3.97	4.13	3.93	4.49	3.59	4.52	4.75	3.01	4.48	5.07
HLA-A	7.27	8.34	8.14	7.86	8.34	7.43	7.89	8.01	8.05	7.68	8.44	7.78	6.81	7.8	7.49	7.98	6.21	8.39	6.22	8.67	8.24	7.66	8.14	8.44	8.93	8.14	6.28	8.67	8.24	7.61	7.56	7.92	7.61	5.75	8.24	8.61	8.33	7.89	7.48	7.59	8.43	7.85	7.48	8.08	7.7	7.85	8.7	7.26	7.3
HLA-B	8.56	8.56	8.93	8.34	9.24	8.67	8.44	8.39	8.93	8.67	9.24	8.05	6.72	9.24	7.75	8.67	6.08	8.39	8.05	8.44	8.93	8.44	8.44	8.34	9.24	7.51	7.86	8.56	9.47	8.56	8.14	8.93	9.24	5.42	9.18	8.43	8.92	8.8	8.52	8.4	9.18	8.92	7.98	9.02	7.54	8.08	9.68	8.52	8.7
HLA-C	8.93	8.67	8.78	9.47	10.38	9.09	9.09	8.67	8.78	9.09	9.09	8.93	8.44	8.72	8.29	8.34	7.2	7.92	8.67	9.24	8.78	8.78	9.47	9.94	9.47	7.15	9.09	8.78	8.78	9.47	8.56	8.44	8.56	6.03	8.92	8.24	9.18	8.52	8.29	8.09	8.7	8.52	7.66	7.7	7.6	8.12	8.52	8.21	8.61
HLA-DMA	5.41	4.92	5.71	5.54	3.73	5.54	5.04	6.34	6.25	4.86	6.61	5.97	5.37	6.5	5.58	6.5	5.6	6.25	4.66	5.71	5.88	6.45	5.38	4.63	6.07	4.2	5.35	5.55	5.88	5.34	5.59	6.08	6.04	4.97	6.16	5.37	6.32	6.77	6.28	6.01	6.77	6.61	6.37	6.32	6.16	5.91	6.47	7.01	6.77
HLA-DMB	5.63	5.09	5.31	7.35	6.27	5.87	5.35	5.88	5	5.22	5.56	5.5	7.45	6.81	7.86	5.81	7.56	5.59	7.71	5.59	6	6.2	6.29	6.32	5.64	3.96	7.39	5.78	6.12	5.94	6.2	6.84	6.23	8.05	6.14	5.5	6.19	7	6.04	5.88	6.61	6.72	6.42	6.07	6.16	6.81	6.71	7.26	6.92
HLA-DOB	4.1	3.31	4.5	5.47	7.02	5.09	4.38	3.52	3.44	5.08	4.5	3.99	5.84	5.3	3.95	4.7	5.71	4.78	4.9	4.82	5.62	5.04	5.72	4.63	3.78	3.7	6.96	4.03	4.55	5.79	5.21	5.97	5.19	7.31	5.28	4.46	4.29	6.06	5.52	4.7	5.71	5.79	6.04	5.39	4.97	5.76	5.1	7.09	5.91
HLA-DPA1	5.07	4.5	4.79	4.97	4.59	4.77	5.04	5.3	6.28	4.54	6.53	5.27	4.63	4.71	4.18	6.55	3.87	6.5	4.66	5.87	5.7	5.28	4.41	4.51	6.7	5.05	4.5	5.69	5.66	3.83	5.21	5.86	4.47	4.02	5.86	4.98	5.4	5.35	5.76	5.12	6.61	5.56	4.35	6.09	5.94	5.82	6.25	5.11	5.69
HLA-DPB1	7.13	7.27	5.22	7.39	8.14	7.98	7.43	4.51	7.86	8.78	5.88	7.92	7.04	9.69	6.53	9.94	8.72	9.24	4.66	4.97	8.34	9.24	8.56	6.84	8.56	8.44	7.59	6.64	8.05	5.51	7.71	9.69	7.71	4.08	7.24	7.09	5.17	7.44	8.8	7.15	6.44	7.21	7.1	7.89	6.02	8.03	7.37	8.4	9.18
HLA-DQA1	4.54	4.02	1.7	4.66	6.95	5.49	6.34	2.82	2.46	3.39	3.12	2.85	2.1	1.59	6.07	7	7.2	2.02	5.03	2.53	1.54	6.11	5.01	2.46	2.04	2.39	5.17	2.32	6.64	6.5	0.77	6.02	5.6	4.51	5.43	3.62	1.87	7.54	6.64	6.25	1.59	1.59	1.17	1.59	1.17	1.38	6.94	2.33	1.17
HLA-DQB1	4.71	1.65	1.07	5.19	4.66	3.16	4.74	4.51	1.7	1.3	1.73	2.07	1.49	0.77	5.25	4.73	4.67	1.54	3.07	0.62	2.69	3.98	2.92	4.33	1.54	3	4.45	1.43	6.08	5.48	0.77	5.67	2.36	3.7	5.72	3.25	1.87	4.86	4.1	4.49	1.17	1.17	2.14	1.17	1.59	2.48	6.53	3.05	1.59
HLA-DRA	8.24	8.05	7.66	5.04	6.38	6.34	7.56	6.85	7.43	7.86	7.98	6.17	4.47	7.71	5.87	7.75	4.05	6.63	7.66	5.97	6.57	6.2	5.69	7.56	7.02	6.5	5.93	6.54	7.56	8.14	6.05	8.56	7.51	4.32	7.34	8.29	7.74	7.29	7.91	7.41	8.08	7.29	6.78	7.54	7.81	7.4	7.89	5.74	7.07
HLA-DRB1	4.16	3.31	4.13	3.44	7.61	5.3	6.06	3.29	5.9	6.79	5.59	2.07	1.49	2.6	4.18	2.71	4.05	2.36	1.3	3.38	5.01	5.04	2.74	3.93	4.52	3.96	3.25	3.92	6.87	5.31	1.22	6.61	4.87	3.43	4.83	4.63	3.91	6.95	4.98	6.35	4.92	3.75	2.14	7.03	4.46	4.48	7.66	4.05	2.61
HLA-DRB3	7.1	4.73	7.98	7.17	4.3	6.23	6.1	7.56	7.73	6.04	7.92	7.51	5.76	8.24	5.87	8.14	5.53	6.63	5.31	7.8	7.8	6.41	6.81	5.81	7.31	5.57	6.33	7.56	7.92	6.58	6.17	7.86	7.47	5.81	7.98	5.29	8.18	7.93	7.57	6.75	8.52	7.98	7.31	7.8	7.95	7.98	8.24	6.52	7.81
HRAS	4.33	4.66	3.84	1.96	2.83	3.9	4.27	3.52	3.67	4.54	3.12	2.85	3.16	3.17	3.24	2.71	3.36	3.29	3.93	3.19	2.69	2.37	2.92	2.83	2.98	3.7	3.72	3.53	3.47	2.57	3.29	2.85	3.62	3.07	4.83	4.67	4.72	3.28	3.51	4.06	4.72	4.11	3.9	4.81	4.58	4.07	5	3.49	3.52
ICAM1	7.98	7.04	7.08	7.71	8.72	7.68	6.99	6.56	6.23	8.24	6.53	6.58	7.8	6.85	7.35	6.21	5.21	6.94	9.09	6.58	6.11	7.1	7.75	8.24	6.18	9.24	8.05	6.21	6.18	8.05	6.63	7.08	6.92	7	6.06	6.62	6.7	5.76	7.39	5.46	5.9	5.4	6	5.49	6.2	6.59	6.08	6.77	5.53
ICAM2	6.68	6.31	6.44	6.19	6.84	7	6.66	6.34	6.48	6.64	7.08	7.13	5.55	6.45	6.07	6.4	5.43	7.27	4.78	7	7.26	7.51	6.14	6	7.47	5.23	5.63	6.94	6.45	6.14	6.96	6.26	5.68	5.21	5.52	5.5	5.17	6.26	5.05	5.94	5.4	6.03	5.81	5.65	5.93	5.02	5.83	5.11	5.76
ICAM3	4.44	4.63	4.5	4.17	4.3	4.48	4.74	5.4	5.11	4.09	5.37	5.04	5.05	4.34	3.95	4.37	5.07	5.38	4.66	5.19	5.51	4.56	4.32	4.33	5.72	5.4	4.31	5.04	4.07	4.1	4.64	3.86	4.58	3.99	5.9	5.41	5.5	5.92	5.36	5.92	6.12	5.18	5.88	5.92	5.99	5.97	5.85	5.5	5.6
ICAM4	4.5	4.18	4.5	5.62	3.5	5.08	4.6	3.95	2.92	4.33	4.84	4.65	5.6	6.01	4.41	5.14	5.71	4.78	5.68	4.53	5.24	5.54	5.33	4.63	4.52	5.86	5.93	5.04	4.99	5.35	4.45	5.94	5.88	6.4	5.76	4.67	5	6.2	5.69	4.75	5.18	5.94	5.81	5.22	5.32	5.4	5.76	5.89	6.3
ICAM5	1.99	2.52	2.45	3.27	1.49	2.82	1.59	2.82	2.46	3.39	0.77	3.18	3.42	2.41	3.24	3.23	4.05	3.72	3.68	2.2	3.65	3.26	2.37	3.5	1.54	3	2.55	2.32	2.78	2.96	2.36	3.28	2.7	3.56	4.16	3.25	4.1	4.06	3.62	4.08	3.65	3.78	4.08	3.59	4.08	4.29	4.22	4.05	4.11
ICOS	4.81	4.92	5.15	5.54	5.52	4.71	5.86	6.34	5.69	4.86	5.66	6.86	6.06	5.35	6.76	4.8	4.84	6.06	5.86	6.2	6.92	6.34	5.72	5.4	5.97	5.74	5.09	5.71	4.64	4.47	4.82	3.69	5.5	3.99	5.52	5.29	5.26	5.48	4.87	6.02	5.84	5.08	5.37	5.73	5.01	6.18	5.29	6.29	4.96
ICOSLG	5.87	5.68	4.3	6.82	5.24	5.81	4.6	4.51	4.4	5.41	4.5	3.74	6.26	5.49	6.21	5.02	6.58	4.14	3.68	4.61	4.24	4.56	6.84	6.54	4.62	3.7	7.18	4.39	4.75	5.63	4.97	6.13	4.65	6.92	6.06	6.24	5.85	5.65	5.53	6.01	5.71	5.9	6.12	5.96	6.53	6.32	5.58	6.21	5.76
IDO1	5.19	4.69	4.3	6.88	6.15	5.19	5.35	4.24	4.09	5.6	5	3.74	7.2	6.28	4.68	5.7	6.21	4.53	6.19	5.1	4.44	6.04	6.2	6.27	5.72	4.96	6.99	5.1	4.88	6.01	5.8	5.45	5.28	7.15	5.33	2.61	4.54	5.65	4.62	4.19	4.45	5.84	5.78	5.54	5.32	5.68	5.34	7.26	5.97
IFI16	4.61	4.66	4.6	4.17	4.53	4.41	4.83	5.58	5.32	4.33	4.65	5.63	3.89	2.92	3.95	4.92	4.05	5.12	3.68	4.82	4.24	3.41	4.07	3.7	4.71	4.4	3.72	4.31	3.94	3.76	4.52	3.57	3.76	3.96	4.71	5.37	5.07	4.29	4.28	4.73	5.48	4.94	4.08	4.31	4.41	4.82	5	3.49	3.52
IFI35	4.3	4.18	4.13	3.06	3.5	2.94	4.27	4.24	4.87	3.86	3.69	4.65	2.83	3.58	3.69	3.9	2.13	4.01	2.55	5.1	4.67	2.62	3.67	1.92	5.21	3.96	3.33	3.68	4.18	3.3	4.82	3.53	4.47	2.6	5.96	4.77	5	4.4	2.33	4.36	4.68	4.84	3.9	4.95	3.75	4.18	6.35	3.49	2.61
IFIH1	7.02	6.15	5.55	5.96	5.81	4.73	5.84	4.85	5.59	5.53	4.09	5.27	4.47	5.16	5.1	5.02	4.24	4.41	6.33	6.03	5.62	4.07	4.21	5.56	5.72	6.12	5.86	5.1	5.82	5.39	5.68	5.63	4.87	5.58	6.12	6	5.66	5.22	4.48	5.75	5.48	5.16	4.61	5.08	4.8	5.54	6.4	4.98	4.11
IFIT2	8.05	5.53	5.31	4.71	5.81	5.02	6.37	4.51	5.54	5.14	5.21	5.16	6.43	4.25	5.87	5.08	5.21	4.66	6.14	6.2	6	4.9	5.65	6.13	5.93	5.95	6.36	5.37	5.27	5.48	5.75	5.69	5.37	5.93	6.91	6.72	5.5	5.3	5.33	6.11	4.92	5.57	4.98	5.15	5.82	6.18	7.52	6.52	5.28
IFITM1	10.38	10.38	8.5	7.75	9.94	9.24	8.67	7.86	9.09	8.34	7.78	7.61	7.61	7.41	7.56	8.56	6.44	7.8	7.31	8.93	9.24	7.43	7.41	8.93	8.78	9.09	8.93	7.51	8.67	8.78	8.67	9.09	8.67	8.78	8.7	9.42	8.24	8.29	7.7	7.96	7.66	7.66	6.27	7.34	6.96	7.55	8.92	7.09	7.54
IFNA1/13	4.26	2.99	3.7	9.09	3.5	4.77	4.27	2.82	3.22	5.68	4.2	4.24	6.66	6.35	4.68	4.58	8.72	3.29	8.34	5.19	3.89	5.7	7.2	5.88	3.22	6.88	7.71	4.92	5.71	6.58	6.37	6.94	3.96	9.24	4.39	4.23	4.21	5.43	4.94	5.19	4.38	5.43	6.62	5.15	5.52	5.68	4.73	6.94	6.69
IFNA2	4.18	2.52	3.14	6.96	5	4.29	1.59	3.29	2.46	4.97	3.12	3.99	2.83	4.43	4.68	3.83	6.44	2.9	3.4	4.61	4.24	4.97	5.01	5.43	2.65	3.4	5.95	2.62	3.84	5.7	5.1	5.6	2.7	7.71	3.49	3.25	3.67	4.69	4.06	4.27	3.81	4.75	5.78	3.87	4.08	5.02	3.84	6.35	5.11
IFNAR1	6.45	6.03	6.31	6.11	5.63	6.26	6.16	5.4	4.93	6.35	5.84	5.38	5.65	6.19	4.68	5.32	6.44	5.59	6.18	5.78	6.11	5.94	6.29	5.93	5.37	5.78	6.14	6	5.48	6.17	5.86	6.04	5.37	6.26	6.42	6.5	5.84	6.03	6.14	6.3	5.99	5.34	5.95	5.85	6.14	5.88	5.47	5.83	5.6
IFNAR2	5.53	5.12	5.71	4.58	3.5	5.71	5.35	4.68	5.22	4.62	5.3	5.38	4.07	3.71	4.68	5.21	3.36	4.86	4.16	6.31	4.67	5.12	3.52	4.43	5.51	5.86	4.19	5.41	4.99	4.53	4.88	4.64	4.24	3.89	5.96	5.22	5.73	5.68	5.82	5.01	5.99	5.72	5.55	6.04	5.39	5.76	5.29	5.5	5.16
IFNB1	5.3	3.54	5.06	9.24	7.39	5.76	4.6	3.29	3.44	6.23	4.5	6.34	6.7	6.54	8.78	5.24	9.69	4.01	7.89	6.16	5.42	6.55	8.05	7.71	4.18	2.39	8.24	6.37	5.55	7.71	6.79	7.31	6	9.94	5.15	3.62	5.22	5.92	5.69	5.05	4.97	5.75	6.71	5.44	5.67	6.7	5	8.8	7.49
IFNG	3.18	2.99	2.45	2.44	3.19	2.94	3.5	4.24	2.92	3.1	3.53	3.48	3.67	3.41	3.24	3.23	3.87	4.01	3.68	3.19	3.89	4.07	3.35	3.7	4.18	3.7	3.15	4.39	2.07	2.81	3.77	3.28	2.92	4.39	3.49	4.77	4.36	4.83	3.98	3.11	3.81	4.46	4.35	3.68	4.84	4.68	3.52	4.3	4.96
IFNGR1	4.33	4.95	4.13	4.58	4.05	4.91	5.47	5.69	6.11	3.1	5.62	5.04	5.21	4.71	3.69	5.49	5.21	5.12	3.68	5.26	5.77	4.56	5.49	4.63	5.83	4.56	4.31	5.78	5.37	4.85	5.34	5.31	4.72	4.82	5.57	5.29	5.26	4.89	5.3	5.27	5.78	5.3	5.15	5.22	5.47	5.54	5.94	4.84	5.53
IGF2R	6.34	7.08	5.86	5.79	6.29	6.63	6.81	6.95	7.1	6	6.76	6.86	6.32	4.71	6.07	6.55	4.24	7.15	5.12	6.68	6.82	5.37	5.75	7.8	7.13	5.3	5.68	7.27	5.61	5.13	6.79	5.26	5.95	3.56	7.09	7.05	7.24	7.07	6.77	7.6	7.03	6.81	7.51	7.06	7.18	6.53	7.19	5.97	7.03
IKBKAP	4.71	5.11	3.14	2.44	2.83	4.13	4.53	2.82	3.83	4.09	2.67	3.18	2.1	1.3	1.76	0.77	2.13	2.65	1.92	2.53	2.69	0.77	3.09	2.83	3.78	3.4	2.34	3.26	3.29	3.08	2.63	2.44	3.12	2.04	5.1	5.64	4.72	4.23	3.76	5.11	4.92	4.51	4.7	5.31	5.43	5.44	5.17	3.49	2.95
IKBKB	5.12	6.24	3.96	2.76	5.56	4.66	5.65	4.24	4.48	5.3	4.5	4.65	4.47	3.17	6.66	3.83	3	4.29	2.55	3.96	3.89	2.97	3.74	3.7	4.41	3.7	4.19	3.92	3.69	3.94	4.05	4.13	3.12	3.2	5.15	5.33	5.26	4.49	4.9	5.53	4.85	4.69	5.15	5.65	5.62	5.54	5.06	4.48	4.28
IKBKE	5.81	5.44	6.81	5.69	3.73	4.91	5.81	5.14	5.47	6.9	5.3	3.99	4.07	5.3	4.68	4.73	3.67	6.27	3.4	4.82	5.01	4.9	5.38	7.61	4.41	5.92	4.58	4.39	4.67	6.2	4.97	4.97	7	4.45	4.95	5.64	5	4.6	6.01	5.57	4.92	4.61	4.35	4.95	5.72	6.26	5.38	6.06	5.46
IKBKG	5.22	5.14	4.95	4.05	4.77	4.71	2.8	3.95	4.56	4.09	4.01	3.48	3.67	4.71	4.18	4.58	4.24	4.66	3.4	4.19	4.44	4.07	4.07	4.33	3.61	4.2	3.51	4.73	3.94	3.9	3.92	3.93	4.65	4.24	4.64	5.17	4.72	5.3	4.48	5	5.32	5.27	5.22	5.22	5.16	5.35	5.29	5.11	5.49
IKZF1	3.75	4.4	3.84	5.96	5.35	3.82	4.6	3.29	3.22	4.33	3.69	3.48	3.89	3.41	5.58	3.32	4.99	3.1	7.2	3.38	3.39	3.52	4.88	5.07	2.34	5.92	4.96	3.26	3.47	4.53	4.71	4.64	2.7	5.14	4.25	5.29	4.44	3.61	4.39	3.63	3.34	3.48	4.7	3.59	4.18	2.84	3.01	5.83	4.03
IKZF2	3.89	3.54	3.14	3.7	4.41	3.09	4.6	2.82	3.44	4.09	4.35	5.04	5.21	3.81	2.59	2.71	3	3.89	4.48	2.83	3.39	4.07	4.07	3.93	4.41	3	4.19	3.68	3.29	3.46	2.82	2.62	4.24	2.81	4.64	4.72	4.44	4.45	4.87	4.93	4.68	4.27	4.19	4.87	4.41	4.59	4.31	3.49	4.63
IKZF3	2.61	3.31	3.14	4.58	4.41	4.02	4.45	4.51	3.22	4.62	3.84	3.48	5.5	4.92	4.41	3.76	3.87	2.36	6.39	3.84	4.07	3.89	6.29	5.31	2.65	4.85	6.56	3.79	3.84	3.3	3.29	4.04	3.12	5.53	4.16	2.61	4.8	4.96	5.01	4.64	4.38	4.61	4.7	4.08	4.74	4.82	3.69	6.59	5.07
IL10RA	5.07	3.31	5.74	4.05	3.91	4.07	4.53	4.68	5.9	4.09	5.15	3.99	4.63	5.06	4.41	6.26	4.05	5.59	4.48	5.35	4.24	4.15	3.67	4.51	4.71	3	4.05	4.03	5.57	4.32	3.92	5.95	5	3.7	5.33	4.09	5.35	5.06	5.94	4.91	5.25	4.51	5.49	5.15	4.58	5.02	5.21	4.48	5.65
IL11RA	4.44	5.56	4.79	4.97	5.41	5.27	4.96	5.14	4.75	4.54	5.96	5.82	4.63	4.71	4.95	5.32	4.55	6.1	3.68	4.53	4.24	4.74	4.56	5.61	5.8	4.96	4	5.95	3.69	4.69	4.58	3.74	4.47	3.7	5.28	5.76	4.88	5.17	4.74	5.72	5.45	4.94	5.37	5.6	5.01	5.09	5.06	4.98	5.16
IL12B	1.99	3.92	3.55	4.4	4.3	2.94	3.18	3.72	2.92	3.39	3.69	3.18	3.42	3.81	3.95	3.51	3.87	3.29	3.68	3.68	3.39	3.89	3.52	3.93	3.42	4.4	4.05	3.26	3.39	3.46	2.82	3.53	3.96	4.78	3.83	4.36	4.1	4.23	3.69	3.53	3.81	4.04	4.61	3.98	4.18	4.18	4.14	4.84	4.59
IL12RB1	2.61	3.73	3.96	3.82	3.19	3.82	2.8	2.82	3.44	2.23	4.29	3.18	3.42	4.43	4.68	4.24	3.87	3.72	4.48	3.68	3.39	4.64	3.89	3.09	4.41	4.4	3.15	3.68	3.84	3.08	3.92	3.14	4.65	3.43	4.58	4.36	4.44	4.36	4.48	4.49	4.45	3.71	4.8	4.31	4.41	3.64	4.14	4.84	5.11
IL13	3.32	2.99	3.14	3.94	5.15	4.73	2.36	1.99	2.46	4.09	3.12	4.65	5.95	4.71	3.95	3.72	4.05	4.41	4.16	3.84	3.39	4.3	3.67	3.93	3.42	5.57	3.51	3.68	3.47	4.1	3.06	4.16	5.08	6.54	4.64	4.36	4.21	4.78	4.18	4.35	3.88	3.93	4.35	3.1	4.68	5.16	4.46	4.66	4.11
IL13RA1	4.5	4.58	4.79	4.4	3.19	4.53	4.6	4.68	4.64	3.73	5.09	5.04	3.42	3.81	3.24	4.04	3.36	4.41	3.93	3.68	3.89	4.07	4.07	4.43	5.02	4.2	3.62	4.65	4.88	3.94	4.52	4.24	4.47	3.6	5.86	5.08	6.02	5.25	5.45	5.72	6.21	5.71	5.37	5.92	6.09	5.72	5.99	4.48	4.83
IL15	4.16	1.65	3.39	1.96	2.37	2.35	3.5	3.29	2.92	3.73	3.69	3.18	3.89	1.99	3.24	2.55	3.87	3.1	3.93	3.06	2.69	3.98	3.35	3.93	3.22	2.39	4.12	3.4	1.49	3.55	3.47	2.81	3.32	3.96	4.39	4.54	4.36	4.54	3.62	4.71	3.46	3.71	3.9	4.46	3.63	4.07	4.91	5.11	4.19
IL16	3.83	4.11	3.39	3.7	4.05	3.52	3.95	5.14	3.83	2.71	4.2	4.84	4.18	3.58	2.59	4.37	3.87	4.01	3.93	4.32	4.67	3.76	3.89	4.14	4.04	3.7	3.15	2.62	3.84	4	4.2	4.24	3.62	4.02	4.83	4.23	5.1	4.49	5.16	4.19	4.97	4.39	4.8	4.08	4.58	4.48	3.52	4.84	4.96
IL17F	3	3.31	3.14	3.7	3.73	3.7	3.5	4.51	3.97	2.23	3.53	3.74	4.18	3.94	3.69	4	4.55	4.29	3.68	3.68	4.67	4.15	4.14	3.5	3.42	4.2	3.51	3.53	3.69	3.9	3.92	3.16	3.62	4.24	4.88	4.36	3.67	4.64	3.98	4.59	4.23	5.16	5.44	5.11	5.05	4.38	5.1	4.84	5.28
IL18	5.33	4.58	4.5	7.56	5.84	5.41	5.1	4.98	3.22	5.14	3.69	4.24	8.24	6.62	7.1	5.7	8.29	4.29	5.87	5.64	5.24	6.31	7.71	7.2	3.61	6.67	6.53	4.65	5.4	6.58	6.05	6.58	5.68	7.24	5.39	4.23	5.5	6.2	5.73	6.02	5.43	6.1	7.06	5.56	5.7	5.85	5.72	7.87	7.63
IL18R1	4.78	5.87	4.95	5.04	6.35	5.49	5.1	4.68	4.82	5.17	4.65	4.44	5.43	5.35	5.39	3.9	5.21	4.53	5.61	3.19	5.01	5.46	5.6	5.71	4.62	4.7	5.25	4.56	4.11	5.1	5.4	5	3.96	6.07	4.71	5.33	4.62	4.6	4.94	4.07	3.65	4.04	4.49	4.31	3.75	4.68	4.22	5.36	4.46
IL18RAP	6.23	5.66	5.37	9.69	8.24	6.7	7.27	6.27	5.07	7.1	6.47	6.95	9.82	8.34	9.69	6.76	10.98	5.22	10.38	6.92	7.18	7.75	8.93	8.05	5.3	9.47	9.69	5.84	6.37	7.51	7.75	7.61	6.84	10.98	6.19	5.25	5.7	6.72	6.34	5.96	5.63	6.9	8.03	5.69	6.59	6.86	6.2	10.09	8.12
IL1A	2.61	2.52	2.8	3.94	3.5	2.35	3.18	3.29	1.7	2.23	2.44	1.3	2.83	3.17	3.24	3.09	3.36	2.02	3.68	3.84	4.07	2.37	2.92	3.93	3.22	3.4	2.1	2.32	2.78	0.77	3.29	2.37	2.36	2.95	1.59	3.62	3.31	2.9	1.59	3.53	2.61	3.31	4.08	2.9	2.98	3.64	3.52	3.05	4.03
IL1B	4.68	4.44	4.66	6.5	5.46	5.65	3.5	4.24	4.64	6.5	4.58	3.74	6.81	5.39	4.18	4.58	7.12	4.01	6.91	4.43	4.44	5.37	6.69	6.1	4.28	8.56	7.43	4.31	4.6	5.86	5.15	5.88	4.47	7.47	3.68	4.9	4.1	4.29	5.24	4.75	4.06	4.91	4.61	4.4	4.8	3.42	4.73	6.52	4.68
IL1R1	4.22	4.4	3.55	2.44	3.19	3.82	3.5	4.24	3.97	3.73	3.44	4.65	2.83	3.41	3.24	1.88	3.36	3.29	4.16	3.68	4.24	3.41	3.35	2.83	3.61	3.4	3.25	1.43	3.39	3.9	3.47	3	3.76	3.74	5.04	4.95	4.88	4.54	4.55	4.85	5.48	4.78	4.98	5.15	4.84	5.35	5.14	3.76	3.3
IL1R2	3.64	4.11	2.8	1.07	2.83	2.35	3.18	2.82	3.44	3.39	2.44	2.07	2.1	2.27	1.76	2.55	3.67	3.1	3.4	3.96	3.65	2.81	2.37	3.7	3.42	4.7	1.54	3.26	2.07	0.77	2.36	2.27	2.36	3.07	4.31	4.67	4.1	4.29	3.62	3.73	4.58	3.87	3.9	4.19	3.63	3.82	4.04	4.05	3.72
IL1RAP	4.93	4.92	4.95	4.9	4.71	4.61	5.17	4.68	5.54	5.3	4.72	5.04	3.89	6.01	4.41	5.15	5.43	4.53	5.03	4.82	6.11	5.37	4.14	5.75	5.42	4.96	4.37	6.91	5.57	5.1	5.64	4.55	5.37	4.8	4.83	4.63	5.17	5.48	5.22	5.31	5.25	5.71	5.29	5.31	5.08	4.59	5.63	5.83	4.96
IL1RL1	9.69	12.07	8.67	7.8	7.98	8.78	9.94	9.24	10.38	10.38	9.47	9.69	7.71	8.93	9.09	8.93	9.47	9.69	10.98	9.69	9.09	9.94	8.78	12.07	9.09	7.75	8.67	9.94	9.24	9.24	9.94	9.94	9.47	7.61	3.98	5.48	4.1	3.17	3.62	3.8	4.68	3.64	3.52	5.39	4.95	3.82	4.6	2.33	4.28
IL1RL2	3	3.54	2.45	3.27	2.83	2.35	3.18	2.82	2.92	3.1	1.73	2.52	3.16	2.27	3.24	1.76	3.36	3.1	1.3	2.53	2.69	1.3	2.74	2.46	2.98	3	3.25	1.43	1.49	2.02	2.63	2.07	2.36	2.36	3.16	5.04	3.67	3.51	3.34	4.21	3.65	2.33	3.3	4.08	3.13	4.29	4.31	4.05	3.79
IL1RN	4.66	3.31	5.31	4.28	3.19	3.4	3.5	3.52	5.22	3.86	2.67	2.07	4.29	4.34	3.24	5.08	4.84	4.14	3.07	4.9	3.65	3.52	3.2	4.25	3.92	3.96	3.9	3.92	4.88	3.69	3.57	4.13	3.96	4.03	3.49	3.62	4.44	4.6	4.18	4.25	4.13	4.82	4.49	4.08	4.08	3.42	3.78	5.11	5.16
IL2	3.32	2.99	3.14	3.94	3.19	3.4	3.74	3.52	3.22	4.33	2.83	3.99	3.42	4.1	4.41	4.16	4.84	2.9	3.4	4.07	2.69	4.84	4.14	3.5	3.61	3.7	3.82	4.03	3.84	3.4	4.2	3.61	4.34	4.2	3.83	2.61	3.31	4.69	4.18	3.53	2.87	4.46	5.07	3.87	3.89	4.18	4.39	4.48	4.46
IL20	3.75	3.73	3.14	4.5	4.84	4.77	4.27	4.51	3.44	3.86	3.84	4.92	5.55	6.19	4.68	5.14	5.6	4.66	5.03	4.82	5.01	6.62	5.6	4.63	4.71	4.4	5.35	4.92	5.12	5.02	5.31	4.9	5.6	5.35	5.36	3.25	4.62	5.97	5.11	4.56	5.32	5.99	5.55	5.11	5.82	5.49	4.8	6.35	6.47
IL21	3.7	4.02	4.04	5	4.47	4.1	3.74	4.85	3.44	4.09	3.94	4.65	4.86	5.68	5.58	4.86	6.08	3.72	3.93	4.32	4.44	4.74	4.71	4.14	4.04	4.56	4.05	4.65	4.26	4.2	4.97	4.34	4.47	4.86	4.39	4.23	3.91	5.6	4.8	4.73	4.63	5.76	5.37	5.02	4.97	4.68	5.06	5.24	6.25
IL21R	4.3	5.42	3.14	6.75	5.9	5.19	4.53	3.52	3.67	5.53	4.2	4.24	5.37	4.58	4.41	4.09	6.58	4.14	5.12	3.51	4.44	4.15	5.65	5.56	2.98	2.39	6.48	4.25	4.48	5.79	5.31	5.74	4.65	6.84	3.83	5.27	4.29	4.29	4.7	4.38	4.06	4.66	5.15	4.66	3.75	4.68	4.53	2.33	4.36
IL22	3.18	2.52	3.55	1.07	2.37	1.43	3.5	3.29	3.44	2.71	2.67	4.24	2.1	3.17	3.24	2.71	3.87	2.36	3.93	2.53	3.39	3.14	3.52	0.92	2.65	3.7	2.92	2.32	2.78	2.96	2.36	1.88	2.36	2.95	NA	NA	NA	NA	NA	NA	NA	NA	NA	NA	NA	NA	NA	NA	NA
IL23A	3.89	3.54	3.39	3.27	3.19	3.4	4.27	3.29	3.67	2.71	4.01	4.65	3.67	2.27	2.59	2.71	3	2.65	2.55	4.19	3.65	4.3	4.32	3.5	4.04	3.96	2.92	3.92	3.11	3.3	3.67	3.28	3.96	3.7	3.83	3.88	4.1	4.36	3.87	4.51	4.31	4.11	5.15	4.08	3.63	2.84	4.67	3.05	3.85
IL23R	3.18	2.99	3.14	2.44	4.18	0.92	3.74	2.82	1.7	2.71	2.44	2.85	3.42	3.41	3.24	2.92	2.56	4.14	3.68	1.65	2.18	2.81	3.35	2.83	2.34	3.7	2.92	2.32	0.62	2.02	3.06	1.7	1.22	2.36	4.39	4.63	3.67	4.16	3.76	4.05	3.81	4.31	3.52	4.66	4.18	3.64	3.29	4.3	3.91
IL26	3.98	4.11	3.39	3.94	4.94	3.94	4.53	4.85	3.97	3.1	3.12	4.65	4.47	4.71	5.1	3.66	3.87	4.53	3.93	4.32	5.01	4.39	4.32	3.93	4.04	3.96	3.9	4.25	3.69	3.46	3.92	3.48	4.24	4.18	3.83	4.77	3.67	4.49	4.18	4.89	4.58	4.08	3.52	3.77	4.27	4.59	5	4.84	4.89
IL27	3.18	4.02	3.84	3.56	3.73	3.6	3.18	3.95	3.44	3.6	3.12	3.18	4.29	2.8	3.95	3.94	4.05	3.72	2.55	3.19	2.69	2.97	3.89	3.28	3.61	4.2	3.06	3.53	3.2	2.37	3.47	3.14	3.47	3.56	4.58	3.25	3.91	4.45	4.48	3.97	4.75	4.46	4.35	4.77	4.52	4.07	4.73	4.84	4.96
IL28A	4.57	2.99	5.02	6.23	3.91	5.73	5.04	2.82	3.97	5.81	4.61	3.74	7.31	6.57	6.96	6	7.66	5.45	4.48	5.03	2.69	6.98	6.6	4.72	3.78	4.2	7.33	5.15	4.8	5.59	5.64	5.54	5.83	7.51	5.43	3.88	4.96	6.5	5.71	5.34	4.97	6.63	6.12	5.76	5.9	5.35	5.38	6.77	7.43
IL28A/B	3	1.65	2.45	3.27	3.19	3.24	3.5	2.82	1.7	3.1	1.73	2.85	2.83	3.94	3.24	2.02	4.41	2.65	3.4	3.51	3.39	3.63	2.58	3.93	2.98	3.7	3.25	1.84	3.11	2.37	3.29	2.71	3.76	3.64	4.16	4.58	2.88	4.06	3.11	3.7	3.65	3.87	4.19	4.66	3.75	3.1	3.84	3.76	4.83
IL2RA	2.38	3.31	3.39	3.44	3.5	2.94	4.13	3.29	3.22	3.86	3.12	3.99	4.74	3.71	4.41	3.76	4.24	3.72	4.16	4.32	3.39	4.07	3.09	3.5	4.04	3.4	3.82	3.68	2.97	3.46	3.47	2.76	3.62	3.89	4.07	4.46	4.1	3.93	4.7	4.18	4.06	4.51	3.9	4.19	4.95	4.18	3.29	4.3	4.46
IL2RB	5.44	5.27	4.72	7.98	6.95	6.11	5.47	4.51	4.75	5.77	5.42	5.5	9.47	7.15	7.49	6.07	9.09	5.03	8.14	4.32	4.24	6.87	8.34	5.51	4.94	7.15	8.34	5.1	5.12	6.31	6.23	6.11	6.51	7.66	5.6	5.46	5.31	6.96	6.91	5.73	5.81	6.35	6.96	5.85	6.41	5.65	5.38	9.02	7.89
IL2RG	4.78	4.27	4.3	3.27	3.19	3.24	2.8	2.82	3.22	5.01	3.84	3.18	2.1	3.58	4.18	3.66	4.05	3.53	1.92	4.19	3.39	2.97	3.09	3.09	3.92	4.56	2.1	2.62	3.47	4.04	3.29	3.56	3.96	2.04	3.83	3.88	3.67	3.4	5.5	2.87	4.38	3.11	3.72	3.3	3.47	3.82	4.04	4.98	3.85
IL3	1.07	3.73	2.45	3.27	3.19	3.31	1.59	3.72	0.62	2.23	2.83	3.18	3.42	4.1	2.59	3.42	3.87	3.53	3.93	3.96	3.39	3.26	3.89	3.5	2.34	2.39	3.51	2.89	2.34	2.02	2.82	3.28	3.12	3.27	2.65	4.09	2.88	3.85	3.51	2.57	2.87	4.18	3.72	3.46	4.27	3.64	3.01	4.66	3.72
IL32	10.98	8.93	12.07	12.07	8.93	12.07	10.98	12.07	12.07	12.07	12.07	12.07	12.07	12.07	12.07	12.07	12.07	12.07	8.93	12.07	12.07	12.07	12.07	10.98	12.07	8.78	12.07	12.07	12.07	10.98	12.07	12.07	12.07	12.07	NA	NA	NA	NA	NA	NA	NA	NA	NA	NA	NA	NA	NA	NA	NA
IL4	3.42	3.31	3.84	4.4	3.73	4.18	3.95	2.82	2.46	3.86	3.33	4.65	4.74	3.58	4.68	4.37	5.35	3.29	3.93	3.68	4.86	4.39	4.63	3.93	3.61	3.4	4.19	4.48	4.35	3.94	3.92	3.79	3.96	4.45	4.31	3.88	3.67	5.13	4.39	3.88	4.06	5.3	4.08	4.72	4.8	3.64	4.84	4.98	5.41
IL4R	6.58	7.61	5.93	5.19	5.63	6.09	6.91	6.77	5.77	5.71	6.35	5.63	3.67	3.81	3.24	4.47	3.36	6.01	4.66	5.1	5.73	4.97	5.24	5.43	6.12	5.4	4.37	5.71	5.48	5.98	5.78	5.42	4.34	3.27	5.19	5.93	5.35	3.4	6.12	5.8	5.67	4.18	3.3	4.19	4.89	4.18	4.73	3.76	3.11
IL5	2.38	3.54	3.96	4.28	3.5	4.36	3.95	3.72	3.67	3.6	4.01	4.44	5.21	4.58	4.68	5.08	6.08	4.14	4.9	4.61	4.86	4.97	5.3	3.93	4.41	3.7	4.78	4.85	4.01	3.46	4.97	3.91	4.58	4.6	5.57	3.62	3.67	5.84	4.74	4.7	4.85	5.67	5.49	4.95	5.01	4.48	5.43	5.74	5.72
IL6R	3.7	4.98	3.7	4.05	3.5	3.82	3.95	3.95	3.83	4.09	4.09	3.48	4.29	2.92	3.69	3.32	3.87	2.65	4.16	3.68	3.39	3.76	4.56	3.7	3.92	4.96	3.51	4.03	4.01	3.9	3.29	3.93	4.34	3.64	5.1	6.45	5.35	4.45	4.9	5.6	5.32	6.08	4.7	5.82	5.39	4.82	5.34	4.98	4.89
IL6ST	7.71	7.92	7.47	6.56	6.45	7.68	7.02	7.66	7.1	7.17	7.13	7.37	5.29	7.31	5.87	7.08	5.86	7	6.7	7.27	7.26	6.98	6.29	7.02	6.87	6.61	6.31	7.43	7.24	7.35	7.26	7.39	7.31	6.44	7.47	8.08	7.18	7.22	7.12	7.46	7.6	7.74	6.67	7.43	7.48	7.63	7.52	5.97	6.75
IL7	3.94	2.99	4.66	4.77	2.37	4.8	3.74	3.29	3.44	4.44	4.35	3.48	5.37	5.57	4.41	5.08	6.58	4.94	4.9	4.19	4.44	5.87	5.01	3.5	4.62	5.05	6.45	4.39	4.07	4.89	4.64	4.82	5.37	5.62	5.33	5.71	5.81	6.18	6.2	5.57	6.29	5.82	6.12	5.69	5.35	5.21	5.99	6.06	6.69
IL7R	5.74	4.73	3.55	6.7	6.54	5.9	5.9	3.72	4.09	6	5.12	3.74	8.56	4.43	7.22	4.73	6.87	4.14	7.13	4.71	5.01	5.7	6.42	6.27	4.85	6.85	7.51	4.25	4.88	5.9	5.1	6.08	4.14	7.92	4.58	5.55	4.8	5.48	5.97	4.91	5.75	5.5	5.37	4.81	4.97	5.35	5	6.06	5.53
IL8	4.5	3.54	5.22	4.83	4.3	4.33	4.27	4.24	5.69	3.86	4.41	3.99	5.12	5.68	4.95	4.7	5.35	4.53	4.32	6.64	5.24	5.6	4.95	4.33	4.62	3.4	4.37	3.26	5.48	4.2	4.71	4.71	5.42	4.71	4.51	4.23	4.72	4.93	4.87	4.1	4.52	4.84	4.35	4.87	4.89	4.59	4.46	5.11	5.35
ILF3	6.3	6.07	7.73	6.63	5.04	7.13	7.1	7.45	6.91	6.25	7.35	7.56	6.11	6.91	6.21	7.1	5.43	7.47	5.31	7.33	7.31	7.92	6.09	6.15	7.24	5.63	5.59	7.75	7.39	6.84	7.26	6.4	7.22	4.64	7.85	6.62	7.89	8.24	8.24	7.99	7.98	7.54	8.24	7.98	8.18	7.51	7.63	7.09	7.78
IRAK1	4.89	4.61	4.39	4.9	3.91	4.71	3.95	4.51	5.4	3.6	4.58	4.44	4.47	3.94	3.95	5.08	4.24	5.22	3.07	5.42	4.07	3.63	3.52	4.14	4.28	4.4	3.41	4.65	4.6	3.4	4.58	3.48	4.87	3.56	5.76	5.22	6.08	5.3	4.98	5.49	5.52	5.59	5.37	5.82	5.67	5.4	5.43	4.66	4.36
IRAK2	4.4	4.73	4.21	2.44	3.19	4.02	3.74	3.72	3.97	6.19	2.83	4.24	3.67	1.99	3.69	1.54	3	4.29	4.16	3.38	3.39	2.62	2.58	4.83	4.04	4.7	1.54	3.12	2.34	5.02	3.06	2.81	4.34	1.7	NA	NA	NA	NA	NA	NA	NA	NA	NA	NA	NA	NA	NA	NA	NA
IRAK3	3.53	5.2	4.21	4.05	4.05	4.27	5.42	3.72	4.28	3.1	4.2	3.48	3.42	4.5	3.24	4.44	4.24	3.89	3.07	4.19	4.07	4.56	4.56	4.25	3.61	3.96	4.12	5.15	3.94	3.62	4.52	3.79	3.76	4.66	4.25	4.46	4.1	3.74	3.51	3.43	4.45	4.27	3.72	4.08	4.68	3.64	4.04	4.05	3.79
IRAK4	6.18	6.99	6	7.22	7.56	6.51	7.31	5.79	5.22	7.41	5.96	6.44	6.38	6.45	6.21	5.32	6.31	4.66	6.96	5.35	5.24	5.94	7.41	7.35	4.85	7.61	7.8	6.42	4.99	6.87	6.14	6.51	6.14	7.15	6.04	6.92	6.65	6.2	7.09	6.73	6.29	6.1	7.1	6.32	6.47	6.86	6.09	7.41	6.62
IRF1	4.13	4.35	3.84	3.82	4.71	4.13	4.13	4.51	4.82	4.71	4.35	5.97	3.42	3.71	4.41	3.66	3.36	3.72	5.75	4.19	5.42	3.89	3.52	3.93	4.28	5.3	2.92	4.16	3.6	3.76	3.29	3.28	4.24	3.07	NA	NA	NA	NA	NA	NA	NA	NA	NA	NA	NA	NA	NA	NA	NA
IRF3	5.07	5.2	5.1	4.5	5.43	5.37	5.47	5.14	4.82	4.97	5	4.24	4.47	4.5	4.68	3.72	3.36	5.45	5.8	4.61	5.24	4.84	4.63	4.43	5.02	5.1	4.31	4.99	4.42	4.94	4.71	3.95	3.96	3.13	5.8	6.44	5.66	5.68	5.66	6.04	5.78	4.64	6.2	5.92	5.16	5.29	5.29	4.84	4.36
IRF4	3.75	4.27	4.39	4.17	4.53	3.82	4.74	4.85	4.28	4.09	4.72	4.24	4.29	4.85	6.07	4.04	4.05	5.32	4.66	4.71	4.67	5.37	4.41	4.56	5.64	5.36	3.82	4.39	3.84	3.83	3.77	3.21	4.87	3.96	4.77	4.58	4.88	5.57	5.69	4.85	5.02	5.08	4.9	5.08	5.21	5.16	5.25	5.24	5.84
IRF5	2.38	2.99	3.14	3.7	2.37	3.09	3.95	3.72	3.44	2.23	3.33	3.48	3.67	2.92	3.95	3.32	2.56	4.53	4.16	4.82	3.65	3.26	3.67	3.5	4.85	4.2	2.78	2.89	3.6	3.08	3.47	2.92	2.36	3.13	5.1	4.23	4.96	4.64	4.06	4.44	5.21	4.82	4.35	5.69	5.76	5.21	5.1	4.3	4.11
IRF7	7.8	7.22	6.45	5.42	6.44	6.17	6.4	6	6.96	6.86	5.48	6.25	7.13	4.85	5.95	6.21	4.41	6.96	4.78	7.04	6.96	5.54	5.93	6.42	6.72	6.63	5.38	5.64	6.96	5.26	6.37	6.16	7.15	4.56	6.88	6.83	6.97	6.26	6.24	6.5	6.25	5.94	5.74	6.38	5.12	5.76	7.07	6.46	5.65
IRF8	3.98	2.52	3.96	3.7	2.37	3.4	2.8	3.29	4.56	3.6	3.33	2.85	3.67	4.43	3.24	3.94	4.24	3.53	3.68	4.07	5.24	3.14	2.74	3.7	1.54	4.4	2.78	3.26	4.18	3.76	3.29	4.04	2.92	3.64	5.15	4.72	4.72	5.13	5.24	3.86	5.4	4.69	4.19	4.87	4.74	5.09	4.6	4.84	4.03
IRGM	4.37	3.31	4.95	8.56	6.66	5.04	3.18	3.72	3.67	5.49	3.12	3.74	6.49	4.58	8.67	4.58	8.44	2.36	3.4	5.42	4.07	5.87	6.45	5.71	4.41	7.43	7.27	5.19	4.88	6.42	6.26	7	4.14	8.56	4.77	4.36	3.67	5.76	4.62	4.95	4.68	5.65	6.67	5.22	5.43	5.97	4.67	8	6.86
ITGA2B	2.61	1.65	3.14	3.94	1.49	4.07	2.8	4.24	3.67	2.71	3.84	1.3	4.07	4.71	1.76	4.37	4.41	4.14	3.93	3.19	2.69	4.3	4.71	1.92	2.04	3	4.42	4.39	3.6	3.62	4.45	3.9	3.47	4.6	4.83	3.88	4.54	5.43	4.31	4.76	4.58	5.4	4.35	5.44	5.01	4.89	4.91	3.76	5.53
ITGA4	4.44	4.27	3.84	4.66	5.15	3.31	3.18	4.98	4.7	5.3	4.29	2.07	2.41	2.8	3.24	3.83	3	4.66	3.07	4.53	3.11	3.14	3.52	3.93	3.22	6.27	4.37	2.89	4.67	4.69	2.63	4.73	3.76	2.85	3.49	5.88	4.21	4.42	4.1	4.23	4.92	3.48	4.08	4.08	4.08	4.48	4.04	3.49	3.3
ITGA5	4.93	5.42	5.02	3.56	2.83	4.61	5.25	4.68	4.56	4.8	5.15	4.65	3.67	3.17	4.41	2.92	1.37	3.72	2.55	4.07	3.65	3.52	3.09	3.09	3.78	5.17	3.33	4.16	4.88	3.76	3.92	3.72	2.7	1.7	NA	NA	NA	NA	NA	NA	NA	NA	NA	NA	NA	NA	NA	NA	NA
ITGA6	4.54	5.98	4.5	2.76	4.84	4.85	5.77	4.24	4.28	4.97	5.37	3.99	4.07	3.71	3.69	3.59	3.87	4.01	3.93	3.51	4.67	4.3	4.63	3.93	5.58	3	3.41	4.25	3.94	4.26	4.85	3.79	3.62	3.13	5.96	6.47	6.22	5.35	5.38	6.25	5.78	5.88	5.07	6.52	6.02	5.62	6.12	4.66	5.6
ITGAE	4.78	5.14	3.55	1.96	3.73	3.94	4.53	3.29	3.22	4.09	3.94	4.65	2.1	1.99	3.24	3.23	3.67	2.36	3.4	3.68	3.89	3.26	2.92	3.5	2.65	4.96	3.72	3.12	2.97	4.89	3.57	2.81	3.47	2.72	3.83	5.66	5	2.74	4.18	4.94	3.65	2.9	2.57	3.3	4.08	4.59	3.29	3.05	3.43
ITGAL	5.72	4.89	6.62	5.79	6.11	5.21	5.04	5.4	6.68	5.36	6.11	4.24	5.95	6.91	5.25	7.04	5.86	6.01	5.89	5.59	5.01	5.7	5.78	5.78	5.88	6.29	5.84	4.92	6.48	5.59	5.4	7.04	5.88	6.33	5.54	4.77	6.1	6.26	6.99	5.24	5.94	6.25	6.37	5.15	5.96	5.94	5.76	6.13	6.37
ITGAM	4.66	4.27	5.06	4.05	4.94	4.02	4.38	4.68	5.4	4.33	4.84	3.48	2.83	4.1	3.95	5.17	4.05	3.53	4.16	4.43	2.69	3.26	2.16	3.93	4.71	4.4	3.15	3.4	4.95	4.53	3.29	4.71	5.42	3.47	4.95	4.82	5.73	4.69	5.94	5	4.75	4.36	4.49	4.19	4.41	4.38	4.8	3.76	4.36
ITGAX	4.37	3.54	5.78	3.56	3.91	3.31	3.95	4.24	5.54	4.44	4.72	3.48	3.42	4.25	3.24	4.8	2.56	3.53	3.4	4.9	3.11	3.76	3.09	3.93	4.28	3	2.55	3.26	5.48	4.26	3.29	5	4.47	3.89	4.39	4.9	4.72	3.51	4.55	3.67	5.02	3.37	3.9	3.59	4.08	3.97	3.52	4.3	2.95
ITGB1	8.34	8.78	7.61	7.43	7.75	8.34	8.56	7.73	7.92	8.05	8.05	7.86	7.92	7.03	7.64	7.39	8.14	7.56	6.88	7.86	7.61	7.61	7.92	8.56	7.92	8.24	8.44	8.34	7.71	8.24	7.98	8.05	7.86	9.09	6.87	7.81	7.14	6.86	7.51	7	6.64	7.09	6.64	6.86	7.03	7.36	6.57	7.01	6.9
ITGB2	4.13	4.27	5.89	4.4	3.91	3.31	4.45	4.85	5.9	4.71	4.5	4.24	3.89	4.1	3.24	5.46	3.67	5.38	3.4	5.49	3.89	4.07	3.2	3.09	5.1	3	3.15	2.89	5.12	4.16	3.57	5.49	4.14	3.7	4.31	5.01	4.54	3.07	4.62	4.25	4.72	4.15	3.52	4.95	4.41	4.59	4.39	4.05	3.72
ITLN1	3	3.73	3.14	3.44	4.05	3.7	3.5	3.95	1.7	3.1	2.2	4.24	3.89	3.17	3.24	3.59	4.55	3.53	4.16	2.2	4.07	3.63	2.92	3.09	3.61	2.39	3.9	3.4	2.78	2.96	2.36	3.35	3.62	4.03	2.9	3.88	3.67	3.85	3.34	4.1	3.65	4.04	4.35	4.4	4	4.89	3.29	4.66	4.59
ITLN2	1.99	3.31	2.1	3.27	2.37	3.09	1.59	3.52	2.92	3.39	3.12	3.48	4.18	3.41	2.59	3.83	3.87	2.65	2.55	2.53	3.11	3.63	2.92	2.83	2.98	3	3.25	3.79	3.6	3.55	3.06	2.71	4.24	3.4	3.49	3.62	3.91	4.16	3.87	4.38	4.31	4.69	3.52	4.56	4.77	3.82	3.52	4.48	4.53
JAK1	5.46	5.76	5.37	3.27	2.37	5.41	4.96	5.3	5.15	5.08	5.21	5.16	4.07	4.58	3.24	4.58	3.67	4.86	5.5	4.53	3.65	2.62	4.41	3.93	4.28	4.4	4.05	4.99	5.78	5.25	4.38	4.82	5.08	2.85	6.29	6.4	6.27	5.17	5.99	6.36	6.39	5.96	5.95	6.38	5.94	6.32	6.12	5.36	5.01
JAK2	5.12	5.09	4.5	4.71	4.9	4.48	5.17	5.14	5.07	4.71	5.21	5.63	4.63	4.71	5.78	5	2.56	4.53	5.03	5.35	5.24	4.39	4.48	5.38	5.51	5.81	4	5.24	4.35	4.2	4.52	4.24	4.58	3.89	5.47	5.22	5.56	5.13	4.7	5.24	5.37	4.77	5.67	5.22	5.32	5.29	5.53	5.36	4.83
JAK3	4.13	4.5	3.7	3.06	2.83	3.16	2.8	3.72	3.44	3.73	3.94	2.85	1.49	2.41	3.69	2.25	2.56	3.29	2.55	2.83	4.24	2.62	1.07	2.83	3.42	1.43	2.78	3.68	2.78	3.4	3.06	2.07	3.12	2.04	NA	NA	NA	NA	NA	NA	NA	NA	NA	NA	NA	NA	NA	NA	NA
KCNJ2	3.18	3.73	3.7	3.7	3.19	3.4	3.18	3.29	3.22	3.6	3.33	2.85	4.47	3.17	3.24	3.83	2.56	2.9	3.07	3.19	3.11	3.63	3.52	3.28	3.22	3	3.72	3.79	4.07	3.55	2.82	3.69	3.96	3.79	3.98	4.23	2.88	4.93	4.18	4.44	3.65	4.18	3.9	4.87	4.18	4.07	3.69	4.66	5.21
KIR3DL1	2.38	2.52	1.07	3.56	2.83	3.4	2.36	3.52	3.67	2.71	1.22	3.18	4.47	3.17	3.69	2.25	3	2.36	3.93	2.83	3.65	2.62	3.52	2.46	2.65	3	3.41	3.12	2.53	3.46	3.06	0.62	3.32	3.74	3.98	2.61	3.31	1.17	3.69	3.33	3.22	2.61	2.14	2.14	2.84	3.23	2.65	4.66	4.03
KIR3DL2	3	2.99	3.7	4.05	3.91	3.16	3.5	2.82	2.46	3.39	3.12	3.18	4.18	4.43	3.69	4.09	4.41	4.29	3.93	3.38	3.11	4.23	3.52	3.28	3.22	3.4	4.12	3.53	3.11	3.4	2.63	3.61	3.12	4.24	4.07	4.36	3.91	4.89	4.62	4.19	4.45	4.73	4.8	4.56	5.08	3.64	4.04	4.3	4.68
KIR3DL3	3.18	1.65	2.8	3.27	4.77	3.46	3.74	3.29	2.46	3.1	2.2	4.24	5.95	3.94	3.69	2.84	3.87	2.36	4.16	3.51	3.11	2.97	4.56	4.94	2.34	2.39	5.12	3.12	3.2	4.29	2.36	4.09	2.7	5.02	3.98	4.09	3.91	4.64	3.11	3.11	3.46	4.21	4.8	4.19	3.75	4.07	3.69	4.66	4.83
KIR_Activating_Subgroup_2	2.38	2.99	3.84	3.27	2.37	2.35	3.74	2.82	3.67	1.3	3.12	3.74	3.16	2.6	3.24	2.41	3.36	3.29	4.32	2.83	3.11	3.63	3.2	2.46	3.42	3.96	2.55	0.77	1.49	2.02	1.8	3.21	3.32	3.27	4.31	2.61	3.91	4.06	3.11	3.53	4.06	4.18	3.3	3.77	3.63	2.84	3.84	3.05	4.19
KLRAP1	3.53	3.73	3.84	3.06	4.05	2.56	4.38	2.82	3.22	2.23	3.33	2.85	3.42	2.41	2.59	2.37	1.37	3.1	3.07	3.06	3.89	2.37	2.37	1.92	3.92	2.39	2.1	1.43	2.53	3.3	3.29	2.27	3.47	1.22	NA	NA	NA	NA	NA	NA	NA	NA	NA	NA	NA	NA	NA	NA	NA
KLRC1	3.42	3.92	2.45	2.44	2.83	1.8	2.8	1.99	3.83	2.23	3.53	2.07	3.89	3.41	2.59	3.59	3	2.9	3.93	1.65	3.89	3.41	3.67	3.09	2.65	3.96	3.06	2.89	2.78	2.81	3.67	2.44	3.47	3.13	3.49	4.23	1.87	4.16	4.06	4.02	2.87	3.78	3.52	3.59	3.47	3.82	3.52	4.05	4.28
KLRC2	2.38	2.52	2.8	3.7	2.37	3.52	3.18	1.99	1.7	3.39	4.2	3.74	3.42	3.17	3.95	3.23	5.21	1.54	2.55	3.38	3.39	4.15	3.74	4.72	3.61	1.43	4.27	2.62	4.18	3.4	4.05	4.31	0.62	5.93	3.68	3.25	3.31	4.78	3.34	3.96	3.81	4.39	3.72	3.77	4.27	4.94	4.22	3.76	4.46
KLRC4	3	3.92	2.45	3.7	2.83	2.94	3.18	2.82	2.46	2.23	2.44	2.85	3.67	3.71	3.24	2.84	4.41	3.1	3.07	2.83	3.39	3.41	3.52	3.93	2.98	3.7	2.55	2.32	2.34	3.3	3.92	2.57	3.62	3.7	3.83	3.62	3.67	4.36	3.98	3.66	4.06	4.41	4.08	4.08	3.31	4.07	3.69	2.33	3.11
KLRF1	1.99	3.73	3.14	3.27	3.73	2.35	3.18	1.99	2.46	2.71	3.12	3.18	3.42	1.99	3.24	2.71	1.37	2.65	3.07	3.06	1.54	2.97	1.7	3.28	0.62	2.39	1.54	3.12	2.78	2.02	2.36	2.62	2.7	2.6	2.9	3.25	2.88	3.28	3.34	3.74	3.22	3.64	3.3	3.98	2.61	3.64	3.69	3.76	3.19
KLRG2	3	2.99	3.39	4.17	2.37	4.02	3.95	4.24	2.46	3.6	2.83	3.48	4.29	3.58	3.95	3.51	4.55	2.36	3.4	3.19	3.65	4.3	3.74	3.93	2.65	3.7	4.59	3.4	4.11	4.63	4.64	4.09	4.14	5.14	4.58	4.98	4.29	4.54	4.31	5.44	4	4.56	4.49	4.31	3.89	4.07	4.31	4.84	4.53
KLRK1	2.82	2.99	2.1	3.7	3.5	2.94	2.8	2.82	3.22	1.3	3.12	3.74	3.16	2.27	3.69	2.55	3	2.9	4.48	3.19	2.18	2.81	1.7	1.92	2.65	3	2.1	3.26	3.11	2.57	3.06	1.22	1.73	2.6	NA	NA	NA	NA	NA	NA	NA	NA	NA	NA	NA	NA	NA	NA	NA
LAIR1	6.19	4.73	6.07	5.19	6.99	5.27	3.5	5.3	6.28	6.45	4.5	3.48	7.27	5.64	6.21	6.63	5.71	5.03	5.12	5.87	3.65	5.12	6.09	4.94	4.71	6.04	7.1	3.92	6.03	5.87	5.31	7.56	5.95	6.92	5.28	6.17	6.35	6.26	6.32	5.28	5.63	5.71	6.31	5.79	5.87	6	5.76	6.13	6.57
LAMP3	3.7	2.52	3.84	2.76	4.3	4.58	4.13	4.24	4.09	3.39	4.01	5.04	5.55	4.58	4.95	4.28	4.84	3.89	4.48	3.68	4.07	5.78	4.81	4.14	3.22	3.4	4.96	3.68	4.6	3.83	4.38	4.59	5.28	5.19	5.23	4.09	4.88	5.84	4.62	4.93	5.11	5.55	5.62	5.44	4.46	5.29	5.79	6.41	5.35
LCK	2.82	3.31	2.8	1.96	3.5	2.94	3.95	3.72	3.44	3.1	3.33	4.24	2.83	2.41	4.18	3.51	3.36	2.9	2.55	3.19	3.65	3.76	3.74	3.09	2.98	3	2.78	4.16	2.78	2.02	2.63	2.92	2.7	4.08	2.9	3.88	3.31	3.67	4.03	3.8	4.52	3.71	4.19	3.68	3.31	3.42	4.14	4.3	4.46
LCP2	5.07	5.4	5.5	4.28	4.59	4.25	3.5	5.3	5.11	4.86	5	4.65	4.98	4.98	4.41	5.21	3.67	4.66	5.12	5.26	4.67	4.48	4.21	4.94	4.85	4.56	4.12	5.55	5.33	4.16	4.58	4.74	5.14	3.4	4.88	5.52	5.35	5.06	5.33	4.28	5.32	4.78	4.61	4.72	4.35	4.68	4.67	3.49	4.19
LGALS3	3	3.54	4.66	3.06	3.19	2.35	2.36	3.72	4.28	3.86	2.44	2.85	2.41	3.41	2.59	3.09	2.13	1.54	4.32	3.38	3.11	0.77	2.37	3.5	4.04	3.4	1.54	2.62	3.94	3.62	2.36	3.61	1.73	2.72	NA	NA	NA	NA	NA	NA	NA	NA	NA	NA	NA	NA	NA	NA	NA
LIF	3.42	3.54	3.39	3.7	4.3	4.48	3.5	4.24	2.46	4.33	3.44	3.74	3.89	4.1	2.59	3.42	5.07	3.53	3.68	3.19	2.69	3.26	4.56	4.14	2.04	3	4.92	3.79	4.07	4.69	3.92	3.66	3.62	4.89	4.88	5.12	4.72	4.83	5.57	4.61	5.4	5.16	5.37	5.02	5.27	4.98	4.53	5.24	4.19
LILRA1	3.53	4.18	3.55	4.05	3.91	4.21	4.13	4.51	4.48	4.09	3.69	3.74	4.18	5.12	4.68	4.16	5.21	5.59	4.48	3.51	4.86	4.64	3.52	4.51	3.22	3.96	4.37	4.48	3.76	4	3.92	4.24	3.12	5.05	3.68	3.62	4.1	4.23	4.34	3.33	3.81	4.58	3.72	4.08	4.18	4.68	4.14	5.36	4.53
LILRA2	4.44	3.54	4.13	5.89	2.83	4.21	3.5	3.95	4.09	4.09	4.01	2.85	4.98	4.1	5.1	3.76	5.21	3.53	3.4	3.84	3.65	4.15	5.24	4.14	2.34	5.99	5.53	4.25	3.94	4.77	3.67	5	3.32	5.81	3.98	4.46	4.1	4.16	3.87	3.73	4	4.36	4.8	4.62	4.46	4.07	3.91	5.63	4.46
LILRA3	3.89	2.52	4.5	5.58	5.73	1.43	3.95	3.52	4.28	5.71	4.01	2.85	2.83	5.57	4.18	3.94	5.97	4.78	2.55	3.06	4.07	5.04	5.05	4.25	4.04	3.7	5.03	2.62	4.07	4.81	3.29	4.42	5.28	5.85	4.16	4.63	5.1	5.32	1.17	4.64	4.31	4.75	5.22	3.87	3.89	4.48	4.53	4.66	4.77
LILRA4	3	2.52	3.7	5.58	2.37	3.73	3.18	2.82	3.67	4.09	3.12	2.52	6.19	3.81	6.53	3.23	4.84	3.89	6.44	2.83	2.18	3.26	4.95	2.83	2.04	4.2	6.18	2.32	3.47	4.58	3.92	4.46	3.12	5.96	4.16	4.09	3.67	3.79	3.34	3.88	3.46	4.41	5.07	3.68	3.89	2.48	4.04	5.36	3.85
LILRA5	5.47	3.92	5.61	6.91	6.41	5.57	5.1	4.24	5.54	6.29	4.58	5.27	7.86	7.03	7.22	6.16	7.47	6.55	7.51	6.03	5.62	6.41	7.02	5.78	5.3	6.22	7.47	5.28	6.14	6.25	5.94	6.66	6.36	7.27	4.77	4.93	5.61	6.9	5.77	5.16	5.18	6.59	6.74	5.39	5.52	6.12	5.21	8.7	7.37
LILRA6	4.54	3.92	4.13	4.4	3.19	2.35	3.95	3.72	4.28	3.86	4.09	2.07	2.83	4.5	5.25	3.09	5.07	3.1	3.4	3.51	2.69	2.62	4.21	2.46	1.54	2.39	4.89	3.53	3.76	4.26	3.29	4.57	3.12	4.96	4.58	4.85	3.91	4.6	4.1	4.06	4.52	5.34	4.61	4.62	4.35	4.94	5.25	3.05	4.73
LILRB1	3.89	4.02	3.14	4.05	4.3	2.73	2.36	3.72	4.48	3.39	3.12	2.52	2.41	3.41	3.24	3.42	3.87	3.72	3.07	3.51	2.69	3.76	2.92	3.93	3.42	3.4	3.72	3.12	4.18	3.62	2.63	4.04	3.62	4.08	3.49	4.46	3.91	3.17	4.03	3.45	4.38	3.64	3.9	4.4	3.89	2.84	3.4	4.66	4.03
LILRB2	4.64	4.73	5.53	4.58	5.68	4.71	4.6	4.68	6.33	5.01	5.09	4.65	4.98	5.06	4.95	6.03	6.44	6.15	6	5.71	5.24	5.12	5.24	5.25	5.21	3.96	5	5.04	5.22	4.2	4.38	5.19	4.87	5.48	5.36	4.54	4.72	5.74	5.79	4.36	5.18	5.34	5.07	5.6	5.16	4.59	5.34	4.48	4.83
LILRB3	3.7	3.73	2.8	4.17	4.18	3.16	3.5	2.82	3.44	2.71	3.33	3.99	3.89	2.8	3.24	2.92	4.24	4.01	3.93	3.38	2.18	3.98	3.35	4.25	2.98	3.96	4.19	2.89	3.69	3.18	4.05	3.69	3.32	4.51	3.49	4.46	3.31	3.93	3.87	4.11	3.65	3.57	4.19	3.68	3.13	3.42	3.91	3.76	3.43
LILRB4	4.57	4.44	5.66	4.66	3.19	3.73	3.5	3.95	6.03	4.54	4.65	4.44	4.74	5.16	5.25	5.59	6.31	3.29	4.9	4.71	4.24	4.74	4.32	4.72	3.78	2.39	4.94	4.8	5.97	4.77	4.28	5.71	5.5	5.01	4.77	4.98	5.1	5.72	5.18	3.97	5.45	5.23	4.7	4.66	4.68	4.59	5	4.05	6.01
LILRB5	3.83	2.99	3.7	2.76	4.59	2.94	2.8	4.24	4.28	2.23	4.09	3.99	4.98	4.1	3.24	3.42	4.41	4.29	4.78	3.38	1.54	3.63	3.99	3.93	3.78	3	4.05	3.26	4.42	3.55	3.06	3.84	3.32	4.16	4.45	5.17	4.8	5.1	4.66	4.62	4.13	4.54	4.98	4.46	4.84	4.18	4.31	4.48	4.96
LITAF	6.41	6.96	6.69	6.05	6.41	7.17	6.54	7.45	7.39	6.35	7.31	7.31	5.89	6.85	7.03	7.13	5.43	7.15	5.58	6.92	6.63	6.11	6.17	6.11	7.35	5.17	5.59	7.1	7.51	6.87	6.75	7.24	7.15	6.48	7.54	7.54	7.18	7.68	7.85	7.85	7.17	7.14	7.78	7.6	7.66	7.45	7.17	6.85	7.85
LTA	3.75	2.52	3.7	4.4	4.47	4.36	3.95	3.29	4.18	3.86	4.35	4.84	4.47	4.58	3.95	4.37	5.07	4.94	4.16	3.96	3.11	4.64	4.81	4.25	3.61	3.96	5.21	3.92	3.47	3.46	3.67	4.49	4.47	5.91	4.25	4.77	4.54	4.93	4.8	4.53	4.63	5.1	4.98	4.08	4.74	5.09	4.87	5.5	4.46
LTB4R	4.4	5.06	4.6	6	5.28	5.12	4.13	4.24	4.48	4.92	4.35	4.65	3.16	4.5	5.1	4.28	4.84	3.89	5.65	4.43	4.44	4.48	5.12	5.31	4.78	3.7	4.94	4.25	4.35	4.53	4.38	4.59	3.96	5.54	4.77	4.88	5.26	5.15	5.24	5.23	5.63	4.87	5.07	5.52	5.21	5.62	5.14	5.97	4.96
LTB4R2	3.75	3.92	4.21	3.06	3.19	4.18	4.13	4.24	3.44	3.39	4.41	4.44	3.89	4.1	3.95	3.51	3.36	4.14	3.68	3.51	3.89	3.52	3.99	3.28	4.62	2.39	4.19	4.03	3.6	3.3	3.06	3.93	3.47	4.05	4.95	4.46	5.35	4.64	4.39	5.14	4.31	4.21	4.49	5.08	4.68	4.94	5.1	4.05	5.01
LTBR	6.14	6.54	6.25	6.75	6.87	6.68	6.44	6.21	6.43	6.96	6.19	5.89	6.9	6.68	6.76	6.21	6.21	6.88	6.34	6.54	7.1	6.87	6.9	7.43	6.45	5.74	7.04	6.69	6.5	6.25	6.45	5.98	6.84	6.75	6.82	7.17	6.97	7.22	6.4	6.99	7.05	7.31	7.03	7.12	7.09	7.55	6.96	7.14	7.2
LTF	4.72	6.11	4.3	7.66	6.51	6.07	6.2	3.95	4.87	5.36	4.41	5.82	4.07	5.57	7.75	4.21	5.86	5.59	7.56	4.32	4.86	5.12	6.39	6.87	4.41	8.67	5.21	4.85	4.01	5.17	4.38	4.68	3.76	4.41	5.54	5.68	6.27	5.81	9.68	5.26	6.37	5.25	8.52	5.52	5.05	6.75	5.83	4.98	6.17
MAF	3.94	4.18	3.7	3.94	3.73	4.55	4.27	5.14	4.09	4.62	3.94	4.92	5.21	4.1	3.69	4.28	4.84	4.29	4.66	3.96	5.24	4.64	4.56	3.5	4.04	3.7	4.5	4.73	4.35	4	4.78	4	4.34	4.37	5.6	4.09	5.5	5.63	4.8	5.48	5.37	5.62	5.29	6.12	5.9	5.49	5.21	4.84	5.76
MALT1	4.93	5.51	5.22	3.82	4.87	5.37	5.25	4.85	5.15	4.97	5.88	5.63	5.05	5.23	4.68	5.21	4.67	5.12	3.4	3.84	5.51	4.97	4.71	5.01	5.3	3.96	4.37	5.45	4.8	4.99	5.31	4.38	3.96	3.81	6.31	5.84	6.25	5.82	6.43	5.74	5.94	6.13	6.09	6.16	6.32	5.4	6.04	5.24	6.01
MAP4K1	3	2.99	3.84	4.17	2.83	3.67	3.5	1.99	3.83	3.1	4.65	5.04	3.67	4.1	2.59	4.09	4.05	5.22	3.93	3.51	3.89	3.89	3.2	1.92	2.98	4.2	3.62	3.26	2.53	3.62	4.05	3.21	3.96	3.84	4.39	3.88	5.13	4.83	5.16	4.19	4.63	4.51	4.7	4.19	4.84	4.48	4.6	4.48	4.59
MAP4K2	7.31	7.35	7.03	7.47	7.06	7.04	8.34	7.51	6.25	7	6.76	6.79	2.41	4.71	5.78	6	4.05	7.66	3.68	5.87	6.54	6.91	7.15	7.86	6.81	3.4	5.25	6.87	5.93	6.66	6.68	6.23	5.68	4.2	5.8	5.67	6.39	4.78	6.31	6.63	5.21	5.16	6.04	5.51	6.58	5.54	5.85	4.05	5.16
MAP4K4	4.5	5.09	5.42	4.17	5.04	5.57	5.17	5.14	5.32	4.71	5.45	6.17	4.47	4.5	3.95	5.24	4.24	5.45	4.48	6.23	4.67	5.18	4.56	4.78	5.58	3.4	3.62	5.49	5.71	4.96	5.49	4.09	5.14	4.16	6.08	6.04	5.89	5.13	5.11	5.59	5.48	5.65	5.74	5.99	5.82	5.91	5.53	3.49	4.63
MAPK1	6.86	7.17	7.24	6.4	7.45	7.2	7.35	7.35	6.81	7.29	7.1	6.91	6.06	7.56	6.66	7.24	5.71	6.82	6.45	6.64	6.7	7.56	6.45	6.99	6.91	6.17	5.97	7.39	6.99	6.91	7.35	6.81	7	5.25	7.81	7.57	7.66	7.78	7.66	8.05	7.81	7.57	7.93	7.85	8.03	7.6	7.21	6.85	7.59
MAPK11	5.68	6.05	6.25	5.92	5.21	5.97	5.77	5.14	5.47	5.36	6.11	6.5	5.71	5.44	5.58	4.7	6.87	5.59	5.03	4.97	6.33	6.14	5.72	5.9	5.88	6.35	5.59	4.65	5.71	5.59	5.49	5.72	5.19	6.58	5.28	5.91	6.08	5.95	5.53	5.95	5.63	5.16	6	5.34	5.52	5.29	5.91	6.06	5.35
MAPK14	6.07	6.34	5.74	4.4	6.56	5.93	6.23	6.1	6.51	5.94	6.32	6.07	4.29	5.57	4.95	5.78	4.05	6.41	4.32	5.42	6.33	5.23	5.93	6.19	6.54	5.53	4.42	6.27	5.88	5.63	6.32	5.34	5.37	3.56	6.7	7.07	6.8	6.5	6.48	7.27	6.99	6.5	6.77	6.58	6.64	6.18	6.53	5.74	6.47
MAPKAPK2	5.25	5.53	4.66	4.17	5.08	4.48	5.35	5.3	5.65	4.8	4.91	4.92	2.1	3.58	3.24	4	2.13	4.29	4.16	4.19	4.24	3.41	3.2	3.5	5.37	3.96	4.05	5.19	4.99	4.53	4.97	3.63	4.58	2.6	6.01	6.28	5.66	5.86	5.01	6.09	6.29	5.93	6.04	6.49	6.41	6.32	6.35	4.05	3.43
MARCO	4.01	3.31	4.66	3.7	4.05	4.48	3.74	4.24	4.64	4.33	3.12	3.99	5.12	5.79	5.1	5.32	5.07	5.38	4.66	4.71	5.51	5.37	4.88	3.5	4.62	4.56	4.19	4.31	4.35	4.63	4.64	4.53	5.28	4.7	4.95	3.88	4.44	6.01	5.16	4.44	4.72	6.12	6.16	5.08	5.12	4.82	4.91	5.36	6.17
MASP1	3.64	3.73	3.39	4.66	5.15	3.97	3.95	2.82	3.22	4.33	2.83	3.48	4.98	4.92	4.68	4.8	5.86	3.72	3.93	4.43	4.44	4.9	4.88	4.63	2.98	3	5.42	3.26	3.6	3.94	4.28	4.04	4.14	5.07	5.36	5.08	5.56	5.94	4.74	5.75	5.87	6.33	5.88	5.82	5.97	5.85	5.63	5.74	6.12
MASP2	3.89	3.73	4.13	3.56	3.5	3.52	3.74	3.95	3.97	3.39	3.84	3.99	4.86	4.58	3.24	4.16	4.84	3.53	4.32	3.38	3.89	4.48	3.99	3.28	4.04	2.39	4.19	3.92	4.18	3.76	3.92	3.71	4.34	4.08	3.49	3.88	3.31	4.83	3.87	4.56	3.46	4.82	5.29	4.4	4.3	3.82	4.46	4.98	5.01
MBP	3.32	4.58	4.95	4.17	3.5	3.82	4.13	4.68	5	3.1	4.5	4.84	2.41	4.1	2.59	4.37	4.84	4.66	3.07	4.53	4.67	4.56	4.88	3.7	4.71	4.78	3.82	4.25	4.11	3.3	4.71	4.26	4.72	4.27	5.83	4.67	5.66	6.29	5.69	5.9	5.99	5.62	5.95	5.88	5.82	5.91	6.08	5.36	5.84
MCL1	6.33	6.38	6.88	6.36	5.77	6.56	6.62	7.03	6.72	5.94	6.81	7.09	5.95	6.13	6.07	6.14	6.31	7.06	5.73	7.13	6.76	6.04	6	5.88	6.68	6.25	5.81	6.84	7.08	6.68	6.88	6.72	6.75	5.68	7.13	7.93	7.03	7	7.45	7.18	7.41	7.34	7.43	7.14	7.05	6.81	7.1	6.46	6.04
MIF	5.44	5.34	5.78	4.83	5.24	5.63	5.55	5.69	5.47	4.44	5.37	6.25	4.29	4.34	5.58	4.8	3.87	5.12	3.4	6.09	6	4.07	4.21	5.56	5.72	3.96	3.15	6.56	6.01	4.94	5.55	4.16	5.88	3.47	7.63	6.95	7.85	7.18	6.64	7.38	7.6	8.18	7.2	8.03	7.89	8.18	7.78	6.29	6.96
MME	7.86	7.75	6.28	7.92	7.06	6.81	8.24	8.14	7.35	7.51	8.24	9.09	6.96	8.56	6.07	5.94	6.44	6.82	5.24	6.85	6.87	7.86	8.24	8.14	8.24	7.92	7.02	9.09	6.45	6.14	7.92	7.1	5.78	6.03	8.08	6.78	7.09	7.57	5.01	7.55	7.24	8.61	7.14	8.12	8.8	7.89	7.48	7.34	7.25
MR1	3	2.99	2.8	3.27	2.83	2.94	2.36	3.52	3.83	3.1	1.73	3.48	3.42	3.17	3.24	2.84	4.55	3.29	4.48	3.06	3.65	3.41	2.16	2.46	3.78	3	3.62	3.79	3.29	3.08	2.63	3.39	2.36	4.29	3.49	4.77	3.67	3.4	3.98	4.53	4	4.01	3.9	4.08	3.82	3.42	3.4	3.05	3.19
MRC1	5.48	4.63	5.06	3.82	4.66	3.82	5.68	3.72	6	5.41	5.21	4.84	1.49	3.71	6.42	4.44	2.13	1.54	7.47	2.53	5.7	1.3	1.7	3.5	2.34	3.96	2.78	2.89	4.26	4.29	4.28	4.66	4.14	3.2	5.72	6.96	6.87	4.78	6.45	6.25	5.87	4.89	4.19	4.31	5.97	5.09	4.96	3.49	4.03
MSR1	4.4	1.65	5.58	3.06	3.19	3.16	3.18	4.68	5.11	4.33	3.84	3.74	3.67	4.25	3.24	5.66	3	5.03	2.55	5.26	3.65	3.76	3.09	3.5	4.41	3	3.06	3.4	5.04	3.94	3.67	5.38	4.87	3.2	3.83	4.54	5.56	3.85	4.84	4.57	4.75	4.27	4.35	5.22	4.35	4.82	4.39	4.48	4.03
MUC1	2.82	4.35	2.45	3.27	3.5	3.4	3.5	4.24	2.46	2.71	2.2	2.52	3.42	1.3	2.59	0.77	2.56	0.62	2.55	2.83	2.69	3.14	2.16	2.46	2.34	3.96	2.78	2.89	2.53	2.02	3.77	1.49	1.73	0.62	6.64	6.74	7.21	7.48	7.15	7.11	7.21	6.06	7.45	7.06	6.99	7.12	7.57	5.36	6.78
MX1	8.14	6.21	7.86	5.75	5.54	5.27	6.42	6.91	7.66	6.35	5.52	7.78	7.24	5.3	4.95	6.72	4.84	6.58	5.43	9.09	8.14	5.7	5.6	6.32	7.75	5.53	5.54	5.78	8.14	5.56	7	6.5	7.98	5.09	9.42	7.4	8.08	7.83	5.11	6.73	7.12	8.12	5.22	7.57	5.67	6.88	9.18	8.12	5.53
MYD88	9.24	9.24	9.47	9.94	10.98	8.44	8.78	7.92	8.44	9.94	7.71	8.29	10.98	9.09	9.35	8.05	10.38	8.67	12.07	8.78	7.95	9.09	9.24	9.09	7.61	9.69	9.94	8.14	8.34	9.09	8.78	9.24	9.01	10.38	8.03	8.8	8.7	8.05	8.61	8.55	7.89	7.78	8.7	7.63	8.29	8.52	7.93	11.05	9.02
NCAM1	3.53	3.31	3.14	3.7	4.47	3.82	4.83	4.24	4.56	4.71	4.29	4.24	4.29	5.23	4.95	3.9	5.21	4.29	5.03	4.97	5.24	3.14	4.71	4.33	4.28	5.05	3.33	5.55	4.01	4.04	3.92	4	4.58	4.03	4.64	4.67	4.36	5.48	4.25	5.43	4.52	5.1	5.15	4.51	5.16	4.89	4.8	5.11	5.79
NCF4	4.93	2.99	3.96	3.27	5.77	3.16	3.74	4.68	4.56	3.39	4.41	3.99	4.63	2.27	3.95	2.99	3.36	3.89	3.4	3.38	3.89	3.14	2.58	3.5	3.92	3.96	1.54	3.53	3.11	3.18	1.8	3.56	2.92	2.46	3.98	4.98	4.8	3.17	4.55	3.83	2.61	4.01	4.49	3.46	3.63	4.07	3.91	4.66	3.52
NFATC1	5.19	5.33	4.3	2.76	5.41	4.07	3.18	4.51	3.97	4.71	3.53	3.99	3.42	3.17	3.95	3.17	3.36	3.89	4.9	3.84	4.86	3.63	3.99	3.28	4.28	3.4	3.82	4.16	2.53	3.9	3.47	3.46	2.92	2.81	5.04	5.71	4.21	4.54	4.39	4.73	4.68	4.54	4.8	4.77	5.08	4.89	5.43	4.05	3.91
NFATC2	4.37	5.82	4.66	3.82	5.46	5.19	4.74	4.68	4.75	4.54	5	5.5	4.29	4.1	5.58	5.73	5.21	5.32	7.08	5.49	4.67	4.56	5.05	5.47	5.02	7.31	4.78	4.65	4.01	4.85	4.82	4.38	4.87	4.78	5.1	6.51	5.56	5.6	6.06	5.95	5.43	5	5.22	4.95	5.27	4.48	4.87	6.06	5.39
NFATC3	6.11	6.01	5.91	4.9	5.65	5.65	6.14	5.88	5.59	5.81	5.78	5.97	4.86	5.74	4.68	5.53	4.55	6.33	4.16	4.53	5.77	5.7	4.48	5.61	6.29	5.45	4.5	6.29	5.88	5.22	5.86	5.55	6.07	3.56	6.36	6.55	6.6	6.2	6.69	6.77	6.77	6.2	6.42	6.62	6.68	5.82	6.37	6.13	6.21
NFIL3	3.64	3.92	3.84	3.06	3.91	3.82	4.45	2.82	2.46	2.71	3.53	3.99	3.42	3.81	4.68	3.42	3	2.9	5.19	4.07	3.89	3.89	4.41	4.25	3.78	4.4	3.94	3.68	3.94	3.83	3.77	3.59	3.76	4.74	4.07	5.08	4.44	3.93	4.39	4.15	4	4.59	3.9	4.31	4.41	3.64	3.84	3.05	4.28
NFKB1	5.95	6.36	5.22	4.83	6.48	5.93	6.86	5.14	5.62	5.94	5.42	5.16	4.74	3.17	5.58	4.73	3.67	5.32	4.9	4.71	5.81	3.89	4.32	6.51	5.51	5.17	4.5	5.24	3.69	5.13	5.49	4.42	3.96	3.13	5.67	6.39	5.73	4.06	5.83	5.69	5.11	4.62	4.61	5.02	4.63	4.38	4.31	3.49	4.28
NFKB2	3.53	4.18	4.72	4.4	3.5	4.25	4.83	4.24	3.97	3.73	4.35	5.5	5.37	2.92	4.41	4.04	3.87	5.51	3.68	5.54	5.01	4.97	4.21	3.93	5.1	3.96	3.62	5.1	5.12	3.69	4.58	3.4	3.76	3.92	NA	NA	NA	NA	NA	NA	NA	NA	NA	NA	NA	NA	NA	NA	NA
NFKBIA	4.99	4.73	5.66	5.38	3.91	5	5.52	5.79	6.13	4.09	6.15	6.44	4.07	3.81	4.68	5.41	3.67	6.01	4.48	6.09	5.88	5.12	5.12	5.07	6.58	3.4	4.55	6.31	5.12	4.29	6.05	4.46	4.47	4.32	NA	NA	NA	NA	NA	NA	NA	NA	NA	NA	NA	NA	NA	NA	NA
NFKBIZ	4.54	4.18	4.3	2.44	4.18	4.44	4.45	5.49	4.64	4.33	4.84	3.74	2.83	3.81	3.24	4.04	3	4.94	3.07	4.43	3.39	3.41	2.58	4.63	4.85	4.2	2.78	4.73	5.04	4.26	3.67	3.63	3.76	3.07	4.95	4.82	5.77	4.45	6.42	4.8	5.11	3.57	6.09	4.77	3.75	4.82	5.38	4.3	3.91
NLRP3	3.83	3.31	2.8	1.96	3.19	2.73	3.18	2.82	3.97	3.1	3.44	2.85	4.07	3.71	2.59	3.42	2.56	3.72	3.4	3.38	2.18	1.54	1.7	1.92	3.61	3.7	3.72	2.89	3.39	2.57	3.29	3.46	2.7	2.72	4.07	4.72	4.29	2.9	4.43	3.43	3.46	3.23	3.72	3.68	3.47	3.1	3.01	4.3	3.52
NOD1	5.33	5.97	5.58	5.25	4.59	5.54	4.83	3.95	4.82	4.09	4.84	4.65	4.86	4.71	4.18	4.86	5.07	4.66	4.16	4.43	4.44	5.23	5.33	4.63	5.1	4.85	5.56	4.85	5.22	5.22	5.1	5.11	5.5	5.59	5.8	6.21	5.95	5.53	6.12	5.69	5.57	5.84	5.7	6.01	5.27	5.35	6.04	5.83	5.97
NOD2	4.89	4.87	3.14	4.17	2.37	4.07	4.83	4.24	3.22	4.71	3.69	3.18	3.67	5.12	5.1	4.58	5.21	3.72	5.89	3.68	4.67	3.98	4.71	4.43	2.98	4.2	5.97	3.53	4.26	5.05	4.58	5.3	3.96	6.14	4.88	4.09	4.54	4.64	4.8	4.4	4.58	4.64	5.49	4.4	4	5.02	4.31	5.24	5.49
NOS2	3.32	5.48	4.21	2.44	3.5	3.94	4.53	3.52	4.28	3.6	3.33	3.48	2.83	3.81	4.18	2.25	4.24	3.72	4.32	3.68	3.39	2.81	2.92	2.46	2.98	4.2	3.33	3.92	3.29	2.57	3.06	2.37	3.32	2.95	4.16	4.63	3.67	4.29	3.34	4.42	4	3.93	4.08	4.08	4.41	3.82	3.84	4.84	4.36
NOTCH1	7.35	7.1	6.11	8.05	8.05	7.56	7.98	7.2	6.4	7.47	7.2	7.71	6.43	5.35	7.64	6.34	4.99	8.14	7.98	6.28	6.99	7.98	7.27	7.39	6.99	7.71	6.87	7.31	5.27	6.23	6.94	5.39	5.28	4.12	6.58	6.67	6.76	6.1	6.09	6.66	6.48	5.53	6.9	6.59	6.45	6.04	6.32	5.11	5.84
NOTCH2	4.33	3.92	5.58	4.17	2.37	3.6	4.27	5.4	4.64	4.44	4.41	5.74	3.67	3.17	3.24	2.84	3.36	5.03	3.4	4.43	2.18	3.26	3.52	4.33	5.21	2.39	2.34	5.45	4.73	4.1	5.15	3.5	4.72	3.56	NA	NA	NA	NA	NA	NA	NA	NA	NA	NA	NA	NA	NA	NA	NA
NT5E	3.53	4.27	4.86	4.4	4.98	4.02	4.96	5.69	4.28	4.33	4.2	5.74	4.63	3.94	5.1	3.72	4.41	4.41	4.9	5.71	4.86	4.84	4.88	4.33	5.64	3.96	3.94	5.55	4.71	3.94	4.05	3.09	5	3.64	5.76	4.58	5	4.78	4.48	5	5.06	5.34	4.98	5.79	5.87	5.72	5.25	4.98	4.77
PAX5	3.89	3.31	3.7	4.58	2.83	3.7	4.27	4.85	3.67	4.09	3.12	5.04	4.86	4.58	5.72	3.72	4.99	4.41	4.9	3.68	4.24	5.04	5.55	4.14	4.18	4.2	6.87	4.16	3.29	4.63	3.77	4.29	3.32	5.45	3.68	4.46	4.72	4.93	4.1	4.57	4.13	5.22	4.8	3.98	4.89	4.89	4.22	5.11	5.21
PDCD1	3.42	4.4	4.5	4.17	4.53	3.82	4.87	5.3	4.93	4.33	4.41	5.38	5.05	3.41	4.68	4.47	4.41	5.22	5.43	5.03	4.67	5.04	4.21	4.83	5.1	3.96	4.05	4.92	4.18	3.69	4.2	3.09	4.34	3.74	4.39	4.63	4.36	3.74	4.55	4.89	3.88	4.27	5.37	4.72	4	3.97	4.6	6.21	5.6
PDCD2	4.1	4.11	4.39	3.94	4.05	4.66	4.87	5.4	3.83	4.44	4.5	5.16	4.47	4.1	5.25	3.83	4.67	4.01	5.03	4.43	5.24	4.84	4.32	4.25	4.62	3	3.94	4.92	3.69	3.3	4.97	3.61	5.08	3.99	5	4.95	5.73	5.68	5.52	5.51	5.52	5.61	5.88	6.32	5.52	5.49	5.53	5.89	5.43
PDGFB	6.99	6.63	7.56	5.75	5.54	7.51	6.48	6.5	7.31	6.69	7.02	6.5	6.23	7.09	6.87	7.2	6.31	8.56	6.03	7.59	6.26	7.8	6.05	6.37	6.95	4.2	6.16	7.35	6.84	7.13	7.04	6.19	7.06	5.48	6.36	6.66	6.16	6.41	6.32	6.8	6.14	6.52	5.95	6.25	6.37	5.49	6.12	5.63	6.53
PDGFRB	7.75	7.56	8.34	7.22	7.17	8.93	8.05	8.86	8.56	8.14	8.86	9.24	6.6	8.44	8.56	8.44	6.87	9.09	6.48	8.05	8.67	8.93	7.51	7.75	8.34	7.02	6.05	8.93	7.86	8.67	8.93	7.8	8.14	4.6	6.45	6.21	6.3	6.23	6.91	6.32	6.7	6.54	6.2	6.25	6.9	6.29	6.19	5.83	6.19
PECAM1	9.47	9.47	9.69	8.67	9.58	9.94	9.69	9.69	9.24	9.47	9.94	9.94	8.01	9.94	9.94	9.69	7.86	9.94	9.69	9.47	9.94	9.69	10.38	9.47	9.69	8.34	8.78	9.47	9.09	9.69	9.47	9.47	8.78	6.33	7.66	7.66	8.03	8.36	7.98	8.61	8.18	7.51	7.27	7.26	8.1	7.43	7.81	6.64	7.95
PIGR	3.18	4.11	3.84	2.44	5.15	4.33	3.18	4.24	2.92	3.39	3.69	3.18	3.67	3.17	3.24	3.51	3	2.9	2.55	1.65	3.89	3.41	3.2	4.33	3.61	5.95	3.62	3.92	3.11	4.26	4.2	2.92	4.14	3.13	8.18	7.87	9.68	8.7	9.02	8.36	9.42	9.42	9.18	8.92	8.43	9.18	9.02	7.87	8.92
PLA2G2A	3.94	3.31	3.14	5	4.77	4.58	3.95	3.29	3.97	2.23	3.69	3.99	5.84	5.23	3.24	4.5	4.05	5.95	5.78	4.32	3.39	6.26	5.17	3.93	3.92	3.4	5.49	4.65	3.6	4.42	3.29	4.5	4.87	4.95	4.07	2.61	4.44	5.53	5.11	4.63	4.38	5.43	5.55	4.51	4.89	4.75	4.22	6.21	6.14
PLA2G2E	1.99	3.54	1.07	2.76	3.91	3.09	3.18	3.29	3.44	2.23	3.12	3.18	2.83	1.59	3.24	2.41	3	3.89	1.92	1.65	3.89	2.37	2.37	2.83	2.65	3	2.55	3.4	2.34	1.37	3.06	1.7	2.92	2.6	3.98	4.23	4.1	4.06	3.34	3.35	4.23	4.08	3.52	3.87	4.18	3.82	3.78	4.05	4.03
PLAU	5.25	4.61	5.37	4.17	4.18	6.02	5.25	5.69	5.47	4.71	5.66	5.63	4.07	4.43	3.69	5.81	2.56	5.51	3.68	5.03	5.62	4.23	3.99	4.33	6.01	5.67	3.33	4.16	5.53	5.81	4.78	3.97	5.5	3.81	7.37	7.37	6.55	6.75	6.72	8.02	6.88	4.75	6.31	7.47	7.41	6.55	6.29	5.63	5.8
PLAUR	4.22	2.99	4.72	3.27	4.3	4.07	3.74	4.85	4.48	4.09	3.69	4.65	4.07	4.43	4.41	3.9	3.36	4.78	3.07	5.03	4.24	3.41	3.35	3.93	4.41	3.96	3.06	3.68	4.35	4.37	3.29	4.16	4.58	3.94	3.68	4.46	4.72	3.74	4.43	3.73	3.65	3.78	3.3	3.98	4.18	4.18	3.69	3.76	3.3
PML	7.08	6.68	7.2	6.99	6.35	6.94	7.2	7.03	6.94	6.57	6.69	7.17	7.56	6.68	7.03	7.31	6.08	7.39	7.89	7.43	7.47	6.37	6.64	7.13	7.08	5.45	6.92	7.02	7.02	6.45	7.08	6.29	7.92	4.74	6.95	6.12	7.31	7.05	7.39	6.79	7.37	6.97	6.9	6.96	6.82	6.81	7.25	7.47	6.86
POU2F2	3.32	3.31	3.39	3.82	4.05	2.73	3.95	4.24	4.18	3.6	4.01	4.24	4.29	3.58	4.18	3.66	2.13	4.14	5.03	4.07	4.24	3.26	3.35	4.33	3.92	4.2	3.06	4.03	3.6	4	2.36	3.97	3.12	2.81	NA	NA	NA	NA	NA	NA	NA	NA	NA	NA	NA	NA	NA	NA	NA
PPARG	5.22	5.9	6	5.38	4.94	6.27	5.98	5.69	6.33	5.14	5.93	5.97	4.47	5.98	6.07	6.7	5.97	6.41	5.24	6.09	6.5	6.5	5.85	4.94	6.12	5.17	5.21	6.48	5.66	5.08	6.27	5.34	5.6	5.66	5.6	5.34	5.26	5.92	4.77	6.29	5.9	6.03	5.88	5.84	5.49	5.79	5.85	4.3	5.72
PRDM1	4.1	4.55	4.5	5.3	4.41	4.53	4.45	4.68	4.56	4.33	4.84	5.16	4.47	3.94	4.18	4.16	5.07	5.78	4.16	4.9	4.44	4.84	5.17	4.33	4.28	3.7	3.41	3.79	4.48	4.1	4.38	4.16	5	3.99	4.64	5.37	4.44	4.96	4.7	4.44	4.97	4.58	3.9	4.62	4.77	4.75	4.53	5.74	4.77
PRF1	3.53	4.18	4.04	6.05	5.92	4.29	4.13	3.72	4.28	3.6	5.45	5.27	4.98	2.8	5.58	4.44	5.21	3.89	3.07	3.51	4.44	4.3	5.24	3.93	4.28	3.96	5.31	3.4	4.01	4.16	4.05	4.31	4.14	5.73	4.31	3.88	4.8	5.25	5.01	4.69	4.85	5.28	5.07	4.66	4.58	4.94	4.53	5.63	5.43
PRKCD	5.28	5.85	5.22	3.94	5.68	4.39	4.67	4.85	4.7	5.36	4.84	4.65	3.67	4.1	3.24	5	2.56	5.03	5.38	4.19	3.65	2.97	2.58	4.14	4.71	5.23	3.82	4.56	4.88	4.47	4.05	4.66	4.87	2.6	5.39	6.88	5.81	4.86	5.36	6.08	5.99	5.07	5.62	5.96	6.1	5.79	5.53	2.33	3.91
PSMB10	5.07	5.01	6.07	4.66	4.47	5.15	5.65	6	5.77	4.92	6.35	5.5	5.12	5.74	4.41	5.88	4.05	5.85	4.32	5.64	6	5.18	4.41	4.83	6.63	4.96	4.5	5.78	5.61	5.39	5.07	4.85	6.23	4.48	6.33	5.47	6.02	6.5	6.58	6.35	6.52	6.4	6.2	6.53	6.26	5.85	6.64	5.36	6.28
PSMB5	4.89	4.5	5.15	3.82	4.3	4.87	4.67	4.24	4.28	4.86	4.5	4.65	3.16	5.06	3.69	4.37	4.24	4.01	4.16	5.26	3.39	2.97	4.88	3.5	5.02	4.56	4.67	5.37	4.71	4.77	4.38	5	4.87	4.72	6.33	5.71	5.95	5.68	5.62	6.1	5.81	6.18	5.29	6.66	6.07	6.09	6.06	4.98	5.72
PSMB7	5.65	5.79	5.66	4.9	6.01	5.15	5.47	5.69	5.37	4.8	5.66	6.34	4.74	5.06	4.95	4.58	4.05	5.22	4.48	5.35	5.01	4.39	5.05	4.87	5.72	5.74	4.42	5.19	5.04	4.81	4.97	4.44	5	3.99	6.19	5.85	6.15	5.35	5.11	6.31	6.34	6.24	5.49	6.7	6.3	6.64	6.51	5.11	5.6
PSMB8	6.23	5.91	6.03	5.19	5.22	5.85	6.2	6	6.05	5.01	6.06	6.07	4.07	4.58	5.1	5.9	3	6.01	5.65	6.56	6.87	4.84	4.48	5.61	6.63	5.67	4.27	6.11	5.82	5.7	6.01	5.17	5.88	3.74	6.8	6.04	6.73	5.48	6.24	6.34	6.23	5.77	4.9	6.09	5.43	5.29	6.78	4.84	3.72
PSMB9	7.56	6.81	6.19	6.42	7.89	6.72	7.17	6.85	6.99	6.11	7.39	6.95	6.06	5.92	6.87	7.66	5.07	6.75	4.78	7.24	7.8	6.84	6.17	5.71	7.56	7.66	6.28	6.72	6.08	6.1	6.71	5.76	6.38	4.66	6.45	5.12	6.52	6.34	6.35	6.15	6.14	6.2	4.9	5.73	5.76	5.21	6.83	5.5	6.08
PSMC2	5.38	5.36	5.66	4.28	4.47	5.02	5.95	4.98	5.69	5.22	5.27	4.65	4.07	5.57	4.18	4.92	4.67	5.32	2.55	5.87	5.01	4.9	3.89	4.63	5.21	3.96	4.58	5.64	5.19	4.94	5.21	5.06	4.58	4.12	6.48	6.53	6.18	5.35	5.38	6.34	6.43	6.38	5.62	6.46	6.32	6.64	6.29	4.66	5.07
PSMD7	6.41	6.48	6.03	5.85	3.91	6.05	6.51	5.69	5.72	7	6.06	6.44	5.29	5.68	7.1	5.41	4.84	5.9	5.31	5.35	5.73	5.54	5.93	7.04	6.16	7.98	5.47	6.21	6.26	5.96	5.82	5.51	5.78	5.17	6.77	6.15	6.35	6.64	6.19	6.74	6.52	6.78	6.09	6.64	6.8	6.59	6.24	5.5	6.37
PTAFR	5.64	3.73	5.85	6.25	6.71	6.31	5.04	5.49	4.87	6.21	4.95	4.65	9.09	6.75	6.07	6.5	7.12	6.15	7.04	5.71	4.67	7.18	6.76	5.4	5.46	7.47	7.75	5.1	5.66	5.72	5.68	6.68	6.51	7.8	6.06	4.09	5.17	6.86	6.5	5.2	5.48	6.85	6.52	6.2	6.35	6.51	5.91	7.7	7.03
PTGER4	4.78	4.79	4.95	4.71	3.73	5.15	5.59	5.49	5.4	4.54	5.72	6.17	4.63	4.71	4.68	4.24	4.84	5.59	4.9	5.35	5.88	5.28	4.95	5.16	6.12	5.1	4.42	6.25	4.07	3.76	5.21	3.9	4.58	3.89	5.1	5.08	5.26	5.28	4.25	5.04	5.02	4.27	4.08	4.56	4.8	4.98	4.67	6.06	4.89
PTGS2	4.26	5.04	4.79	2.44	3.19	4.66	5.04	5.14	5.47	4.44	5	3.74	3.89	4.98	4.18	4.8	5.53	4.01	4.16	4.19	4.67	6.04	4.71	4.33	4.28	3.7	4.12	4.39	4.42	4.58	4.52	4.34	4.34	4.74	4.16	3.62	3.31	5.17	4.77	4.19	3.65	4.89	4.8	5.02	5.12	4.48	4.73	4.3	5.28
PTK2	7.47	7.66	7.51	7.03	7.24	8.14	7.51	7.61	7.53	7.41	7.86	8.14	6.19	7.51	7.22	7.59	4.55	7.71	7.35	7.59	7.68	8.05	7.09	7.27	7.86	7.27	6.41	7.66	7.39	7.09	7.66	6.87	7.8	4.35	7.78	8.03	7.93	7.98	7.78	8.28	7.85	7.7	8.29	7.74	7.85	7.7	7.74	7.41	8.24
PTPN2	3.64	4.27	4.04	3.06	3.5	3.6	4.13	3.72	3.67	4.09	3.69	4.24	3.67	3.58	3.69	3.32	3.67	4.01	3.93	3.96	3.89	3.52	3.35	3.93	3.92	4.56	4.05	4.65	3.84	3.9	2.36	3.35	2.36	3.7	5.19	4.93	5	5.43	4.77	5.32	5.37	5.19	5.7	5.28	5.12	5.4	5.63	5.11	4.36
PTPN22	3.53	2.52	1.7	2.76	2.37	2.35	2.8	2.82	2.92	2.23	3.53	3.18	4.07	2.41	3.24	2.55	3	1.54	1.92	4.07	3.39	2.81	3.35	1.92	3.78	3.96	2.92	3.26	2.78	2.37	3.92	3	1.22	3.07	3.33	3.88	4.1	3.74	4.18	4.21	4.23	3.31	4.35	3.3	2.84	3.1	2.41	4.84	3.62
PTPN6	4.57	3.92	4.5	4.05	3.19	4.02	4.38	3.95	5.07	3.6	4.72	4.65	3.89	3.58	4.68	4.8	3	5.7	5.03	4.19	3.11	3.52	3.52	3.09	4.85	4.7	3.51	4.56	4.35	3.69	4.2	3.82	3.32	3.81	4.77	4.77	5.13	5.06	4.84	5.05	5.67	4.66	4.8	5.39	5.01	4.82	4.96	3.05	4.46
PTPRC_all	3.89	3.54	5.02	3.27	3.73	1.65	1.59	4.51	4.4	3.1	4.58	3.48	2.83	3.41	2.59	3.76	3.67	2.65	3.68	4.43	3.11	2.81	2.92	2.83	3.22	3	3.25	2.32	4.42	3.08	1.8	4.34	4.14	2.85	3.33	4.63	5.07	3.79	5.43	3.29	4.92	3.11	2.87	3.59	3.47	3.42	3.29	4.05	3.11
PYCARD	4.18	4.58	3.84	4.9	4.59	4.61	2.8	2.82	4.28	4.33	3.69	3.74	3.89	3.94	3.24	3.42	4.05	3.53	3.07	3.84	3.65	3.63	3.89	4.14	3.61	3.4	5.28	4.16	3.6	4.37	3.67	4.48	3.96	5.2	4.45	4.77	4.8	4.36	4.62	3.96	3.65	3.82	4.8	4.31	4.18	3.97	3.69	4.3	4.63
RAF1	4.61	4.73	4.04	3.82	3.73	4.73	4.38	4.24	5.11	3.39	4.29	5.04	2.83	2.8	2.59	2.71	3.67	3.89	3.4	4.43	4.44	2.97	3.52	2.83	4.71	4.78	3.62	4.25	4.48	3.62	4.97	3.06	3.12	3.27	5.49	5.97	5.22	4.2	4.18	5.45	5.52	5.04	5.37	5.87	5.46	5.49	5.58	3.76	3.72
RAG1	3.18	1.65	3.14	3.27	5.08	2.94	3.5	3.52	2.46	4.09	1.73	3.74	3.67	3.41	3.24	3.42	4.55	3.72	3.93	2.53	3.65	3.14	3.52	2.83	2.98	3.96	5.09	3.92	2.78	3.3	3.67	3.69	3.12	4.92	2.9	3.62	4.1	3.07	3.87	3.32	3.81	4.04	4.7	3.87	4.08	3.97	3.29	4.48	4.59
RAG2	2.82	2.99	3.84	5.08	2.37	3.6	3.18	3.95	2.92	4.09	1.73	2.52	3.42	4.1	4.68	3.72	6.76	3.72	2.55	4.07	4.67	4.74	4.81	3.93	2.98	3.4	5.09	4.16	4.55	4.53	5.26	5.19	3.47	6.56	4.39	3.62	3.67	5.25	4.39	4.76	4.45	4.91	4.61	4.62	4.93	4.98	4.22	5.36	4.68
RARRES3	6.61	6.7	5.37	6.05	6.61	6.21	6.29	5.4	4.87	6.35	6.29	3.99	6.32	5.68	6.35	5.66	6.58	5.22	6.57	5.1	6.11	5.87	6.64	6.81	5.21	5.86	6.63	5.55	5.22	6.75	5.94	5.79	5.95	6.7	7.21	7.74	7.29	6.67	6.79	6.04	6.41	6.83	6.45	6.73	6.73	6.7	7.1	6.7	6.31
RELA	5.93	6.88	4.13	5.72	6.87	6.24	6.37	4.24	5.4	4.71	5.3	4.24	5.55	1.59	5.87	3.51	1.37	5.03	5.94	4.19	3.89	3.98	4.32	7.09	4.62	7.35	4.71	5.64	3.11	4.47	5.21	3.43	3.62	2.81	5.1	6.1	5.89	4.64	4.94	5.37	4.63	3.75	4.98	5.02	5.24	6	4.6	4.05	2.78
RELB	4.22	4.5	4.79	4.28	4.41	3.97	3.18	5.14	4.87	4.09	3.69	4.92	4.18	4.34	3.24	3.42	2.13	4.14	4.48	2.53	5.42	3.41	2.58	4.51	5.02	4.78	2.55	3.92	3.84	2.96	4.38	2.27	2.92	2.21	NA	NA	NA	NA	NA	NA	NA	NA	NA	NA	NA	NA	NA	NA	NA
RORC	5.15	4.69	3.7	4.5	4.41	3.6	5.86	4.24	4.28	3.86	4.84	5.82	4.98	3.71	5.1	2.41	3.36	4.78	4.9	4.19	4.24	4.48	4.41	4.72	4.94	5.1	3.51	4.48	2.07	3.69	4.71	3.06	3.96	3.4	6.23	7.03	5.95	5.68	4.52	7.13	6.84	4.98	5.67	6.38	6.32	5.94	6.44	5.24	5.43
S100A8	3.7	3.54	4.04	4.9	4.18	3.4	3.74	3.29	4.93	3.39	4.09	5.27	4.18	4.1	3.69	3.66	4.41	3.53	4.32	2.83	4.44	3.98	3.89	4.72	4.18	3.4	3.25	4.48	3.39	2.96	3.67	4.13	4.58	3.89	3.68	4.23	3.91	3.85	4.06	4.34	3.22	3.82	3.07	3.68	3.63	3.42	3.29	4.84	4.36
S100A9	3.98	3.31	5.31	4.71	3.19	3.4	4.13	3.72	5.96	4.09	4.2	5.74	4.07	3.81	4.18	4.37	3.67	3.72	3.68	5.59	3.89	4.39	3.35	4.56	4.62	3.4	3.25	4.48	5.04	4	4.78	4.41	5.28	3.99	3.16	3.25	4.88	3.51	4.62	3.07	3.81	4.11	3.9	4.08	3.89	4.48	3.78	5.11	3.79
S1PR1	4.64	6.01	4.95	5.38	5.32	5.49	5.1	5.4	5	4.44	5.05	5.5	5.48	4.92	4.68	4.58	4.67	6.1	5.7	5.1	5.24	4.48	5.51	5.21	5.51	3.7	5.21	5.41	4.11	4.94	4.85	5.09	4.34	5.31	4.25	5.58	4.29	5.17	4.55	5.22	4.52	4.82	4.7	4.62	4.74	4.89	4.31	5.24	4.36
SELE	3.75	1.65	2.1	3.27	3.19	4.02	2.8	2.82	3.97	4.44	3.12	1.3	3.89	3.58	3.24	3.42	3.67	2.65	4.16	2.53	4.24	3.63	3.67	3.5	2.65	2.39	3.94	2.89	3.47	4.04	3.47	3.28	3.32	3.92	3.83	4.23	4.29	4.36	4.87	3.29	4	4.54	4.7	3.46	4	4.29	3.52	5.5	4.73
SELL	3.75	4.27	2.8	5.04	4.97	3.09	3.18	3.72	2.46	3.6	3.12	3.18	5.37	4.34	3.95	3.09	3.36	3.72	5.58	2.2	3.39	3.76	4.41	5.07	4.28	3.7	6.03	3.4	4.26	4.42	3.47	4.95	3.76	5.56	3.68	4.95	4.29	4.54	4.39	4.25	4.13	4.61	4.19	4.19	3.47	4.98	3.84	4.3	4.53
SELPLG	2.38	2.99	3.55	3.7	2.37	3.82	4.27	3.52	2.92	3.1	3.12	2.52	3.16	3.17	1.76	3.32	4.41	2.65	3.93	3.96	2.18	2.97	3.52	3.28	2.65	3.96	4.65	4.39	2.97	3.55	3.77	3.71	3.76	4.78	3.49	3.88	2.88	3.74	3.69	4.29	4.52	3.71	4.49	3.3	3.47	2.84	3.69	3.49	4.36
SERPING1	9.09	9.94	8.05	8.86	9.58	9.69	9.24	8.86	8.67	9.24	8.86	8.67	8.93	8.14	9.35	8.78	8.56	7.98	9.94	8.24	9.47	8.24	8.67	9.69	8.67	12.07	9.24	8.44	7.98	9.94	9.09	8.78	8.34	8.93	8.43	9.18	9.02	8.61	9.42	8.92	8.8	8.7	9.02	8.36	9.02	9.68	8.8	8.4	8.43
SIGIRR	4.68	5.04	4.21	3.06	3.19	4.18	3.74	4.24	3.67	3.86	4.29	3.48	2.83	4.1	4.68	3.59	4.24	3.29	3.4	4.19	2.69	4.74	3.74	3.93	4.85	3.7	4.24	4.25	4.07	3.62	4.13	3.97	3.62	3.74	6.01	6.39	5.95	5.57	5.28	6.16	6.29	6.06	5.88	6.35	6.24	6	6.23	5.24	5.65
SKI	6.88	6.72	6.84	5.85	6.68	7	6.88	6.5	5.9	7.04	6.39	6.67	6.01	6.91	5.95	6.11	5.86	6.15	5.65	6.13	6.19	7.13	7.24	5.68	6.34	5.3	6.5	6.77	6.41	6.99	7	6.38	6.66	6.1	6.99	7.87	6.58	6.82	7.21	7.14	6.96	6.69	7.2	6.42	6.9	7.03	6.64	6.59	6.86
SLAMF1	3.18	3.31	2.8	3.06	3.91	1.65	2.36	2.82	2.92	3.6	3.12	3.48	3.16	1.99	3.24	2.25	3.67	2.9	1.92	2.83	2.69	3.26	3.89	3.09	3.42	3.7	4.71	2.89	2.78	3.18	3.06	3.46	2.36	4.56	3.83	4.36	1.87	4.06	2.7	4.3	3.65	3.23	3.72	3.3	4.08	3.23	3.78	4.05	4.03
SLAMF7	4.61	4.18	4.86	8.44	6.58	5	4.91	4.68	4.18	6.61	5.66	3.99	8.14	4.98	6.66	5.02	7.75	5.22	4.9	5.26	4.44	5.3	6.9	6.4	4.62	7.8	6.19	5.19	4.93	6.28	5.72	5.83	5.68	8.14	4.64	5.22	5.45	5.39	5.75	5.26	4.97	4.43	5.84	4.56	4.74	5.49	4.6	7.01	5.88
SLC2A1	4.04	3.54	3.14	3.44	5.24	4.29	4.13	2.82	2.92	3.39	2.44	2.85	3.42	3.71	3.95	2.99	4.67	3.1	3.07	3.96	3.11	2.62	3.99	4.83	3.61	1.43	5.03	3.12	2.78	3.83	4.28	4.09	2.7	5.37	3.98	5.17	4.96	4.06	5.3	5.22	4.23	3.48	4.49	3.98	4.68	4.68	4.67	5.24	4.53
SMAD3	5.28	4.83	5.78	5.12	5.04	5.33	5.29	5.79	4.93	4.92	5.72	6.72	5.65	4.71	5.72	5.94	4.84	6.33	4.66	6.39	5.62	6.04	4.63	4.63	5.97	4.4	4.65	6	5.12	5.13	5.82	4.66	4.87	4.9	6.55	6	6.02	6.38	6.16	6.44	6.41	6.51	6.6	6.83	6.64	6.49	6.57	5.74	6.25
SMAD5	4.93	4.95	5.22	5	4.53	5.37	5.52	5.79	5.32	4.86	6.26	6.67	4.47	4.85	4.18	4.96	4.84	4.29	4.32	5.35	6.26	5.7	5.3	4.51	5.51	5.17	4.84	5.9	5.61	5.08	6.05	4.61	4.24	4.51	6.12	5.55	5.92	6.08	5.99	6.61	6.12	5.9	5.62	6.23	6.1	5.62	6.16	5.36	5.76
SOCS1	3.53	3.73	3.55	3.27	2.83	2.82	3.74	3.29	3.97	2.71	4.09	4.65	3.42	2.8	2.59	3.17	3.36	3.53	4.32	3.19	3.39	3.26	3.74	3.7	3.22	4.7	4.05	2.89	3.11	3.18	4.13	3.39	2.92	3.33	5	4.36	4.72	4.42	4.31	4.06	5.02	4.59	4.08	5.22	4	5.09	5.14	4.66	4.53
SOCS3	4.85	4.83	4.5	6.25	5.28	5.6	4.67	5.14	4.93	5.22	7.66	6.34	5.48	5.74	5.58	5.17	5.97	4.94	4.48	6	6.42	5.18	5.17	5.56	6.21	6.4	4.84	5.19	5.82	6.36	5.26	5.9	4.65	5.48	5.1	5.58	4.88	5.57	6.45	4.69	6.09	5.19	7.55	5.02	5.72	5.35	5.53	5.74	5.49
SPP1	8.44	5.23	10.38	5.96	5.71	7.31	3.95	9.09	9.47	7.98	4.35	6.25	7	7.66	5.39	9.47	6.08	8.93	5.7	8.56	7.04	6.2	5.43	4.72	6.76	5.95	5.42	3.79	9.94	7.75	6.71	8.34	10.38	6.51	10.51	10.51	11.05	11.05	11.05	8.97	11.05	11.05	11.05	11.05	11.05	11.05	10.09	10.51	11.05
SRC	4.06	4.35	3.96	3.06	4.3	3.82	2.8	3.29	4.48	4.09	4.09	4.44	2.83	4.43	2.59	3.51	3.36	3.72	3.4	4.82	3.89	3.98	3.35	2.83	3.61	3	3.82	3.92	4.67	4.32	3.92	3.95	4.34	3.47	5.9	5.37	5.91	6.01	5.85	6.55	6.17	5.99	6.57	6.25	6.51	6.44	6.29	5.5	5.79
STAT1	5.51	5.18	5.78	5.79	4.94	5.24	5.77	6.41	6.07	5.22	5.52	6.58	5.84	5.23	6.35	5.73	4.24	5.9	5.31	7	6.5	4.97	5.43	5.61	6.63	4.96	4.59	5.55	6.53	5.15	6	4.85	5.5	4.18	7	5.63	6.53	5.74	5.45	5.85	6.04	6.24	5.15	6.49	4.89	5.49	7.45	5.97	4.73
STAT2	7.51	6.86	6.74	5.65	7.27	6.34	6.45	6.5	6.86	6.29	6.39	6.86	6.23	5.39	6.42	6.86	5.21	6.25	6.5	7.1	7.04	6.2	6.29	6.56	6.87	6.14	6.14	6.48	6.91	6.2	6.91	6.27	6.61	4.39	7.13	7.14	6.81	5.92	6.64	6.65	6.67	6.67	6.33	6.64	6.68	6.12	6.73	5.24	5.8
STAT3	6.48	7.51	6.33	6.53	7.31	7.61	6.29	7.2	6.88	6.25	6.88	7.37	7.1	5.92	5.95	6.58	6.08	7.1	6.84	7.51	7.04	6.62	6.5	6.6	7.08	6.96	6.38	7.13	6.87	6.34	7.2	6.18	6.66	7.35	7.7	8.12	7.47	7.6	7.26	6.93	7.74	7.63	7.81	7.8	7.51	7.93	7.6	6.77	7.17
STAT4	4.3	3.73	4.86	4.28	4.05	4.25	4.74	5.58	4.82	4.09	4.41	5.5	5.43	4.1	5.58	3.83	4.05	4.94	5.43	4.19	6	3.76	4.14	5.12	5.58	5.05	4	5.1	3.76	3.76	4.71	3	5	3.47	5.43	5.15	4.72	5.41	4.1	5.36	5.11	5.07	5.22	5.34	5.24	5.54	5.63	5.97	4.46
STAT5A	4.26	5.5	4.79	4.83	4.3	4.48	4.67	4.51	3.44	5.3	4.65	3.48	4.29	5.06	4.95	3.94	5.43	4.53	5.12	3.68	3.65	3.41	4.48	3.09	3.92	4.56	5.09	4.99	4.26	4.99	4.38	4.85	3.62	5.39	5.47	5.44	5.1	5.25	5.01	6.22	5.71	4.77	5.15	5.44	4.58	5.62	5.43	4.66	5.28
STAT5B	5.41	5.48	5.1	5.04	5.56	5.49	5.55	5.58	5.54	4.62	5.37	5.5	3.89	4.1	5.58	4.16	4.55	5.9	3.4	4.82	5.42	4.48	4.63	4.87	5.37	4.7	4.89	6.05	4.64	4.53	4.97	3.9	4.72	3.74	6	5.17	5.17	5.57	4.94	5.55	5.99	5.59	5.29	6.28	6.28	5.58	5.97	4.84	4.73
STAT6	6	6.45	6.38	5.25	5.38	6.45	6.06	6.45	6.64	6.29	6.53	6.67	5.65	6.35	5.78	6.18	4.84	6.33	4.78	6.88	5.51	5.78	5.55	6.66	6.26	6.1	5.06	6.58	6.57	6.08	6.32	5.77	6.51	4.6	7.29	7.45	7	6.88	6.88	6.68	7.45	7.37	7.27	7.51	7.24	7.74	7.03	5.74	6.08
SYK	3.18	3.73	3.14	3.82	3.19	2.35	4.38	4.24	3.22	3.6	3.69	2.52	1.49	1.99	4.95	2.25	1.37	3.29	2.55	2.83	4.24	2.16	0.62	1.92	3.78	4.96	2.1	2.32	2.97	2.81	1.8	2.71	1.73	2.21	4.39	5.52	3.67	2.74	2.95	5.01	3.65	2.48	3.3	4.77	3.63	3.97	4.04	3.05	2.78
TAGAP	3.42	4.5	3.39	2.76	4.3	3.97	2.8	4.24	3.67	3.73	3.84	4.84	4.63	4.1	3.95	3.66	4.41	3.89	4.78	4.9	4.67	3.98	4.48	4.51	3.92	4.2	3.51	4.65	4.8	4.2	4.71	4.61	4.47	4.35	4.88	3.62	4.72	4.64	4.94	4.67	4.8	4.64	4.9	4.46	4.35	3.42	4.53	5.89	5.01
TAL1	5.86	6.75	5.15	4.97	5.24	5.78	6.33	4.68	4.4	5.36	5.12	5.38	4.29	5.57	6.07	5.08	5.86	4.78	4.78	5.1	5.01	6.37	5.49	5.56	4.94	4.4	5.84	6.14	4.6	5.05	5.55	4.93	5.28	6.19	5.1	4.36	4.96	5.28	4.84	5.26	4.85	5.57	5.37	4.95	5.52	5.09	4.87	5.74	5.89
TAP1	6.27	6.13	5.86	5.79	5.73	4.91	5.73	4.51	5.69	6.53	5.09	4.65	4.47	2.8	5.1	5.08	3.36	4.94	6	5.42	6.44	4.48	4.48	6.71	5.88	6.45	4.65	4.73	5.12	5.9	5.59	4.8	5.08	3.4	6.64	6.53	6.22	6	5.79	6	6.57	5.69	5.7	5.99	5.87	6.1	7.14	5.24	3.85
TAP2	7.04	7.31	6.74	6.32	7.71	6.84	7.24	6.63	7.73	6.64	6.95	7.2	5.95	6.96	6.81	6.91	6.21	6.75	5.54	6.61	7.43	6.76	6.51	6.45	7.39	6.92	5.37	6.42	6.53	6.96	6.44	6.34	7.31	5.17	6.58	6.13	6.56	6.41	6.59	5.77	6.23	6.7	6.27	6.01	6.12	5.4	7	6.52	6.53
TAPBP	5.71	5.14	6.28	5.89	4.41	5.71	5.97	6.1	6.45	5.56	6.26	6.44	4.86	6.19	4.68	5.97	4.84	6.1	4.66	6.33	5.73	5.46	5.05	5.31	6.26	4.78	4.61	6.69	6.37	5.3	6.14	5.34	6.7	4.24	6.64	5.61	6.65	6.1	6.25	6.17	6.46	6.61	5.78	6.67	6.34	5.68	6.94	5.97	5.97
TBK1	4.01	5.04	3.84	3.94	4.05	4.18	4.91	3.52	4.75	3.6	4.84	4.65	3.42	4.1	4.18	4.47	3	5.78	5.54	4.71	3.65	4.3	3.74	4.63	5.21	3.4	3.15	4.48	4.01	3.76	4.05	2.81	3.62	3.56	5.1	5.41	5.22	5.06	4.66	4.57	5.28	4.75	5.15	5.6	5.49	5.09	5.79	5.63	3.91
TBX21	5.07	4.63	4.5	4.58	4.3	4.84	4.74	5.69	4.75	5.14	5.05	4.84	5.71	5.44	6.53	5.46	6.44	5.85	4.78	5.71	6.33	5.98	5.78	5.25	6.01	5.6	5	5.31	4.71	4.42	5.64	4.53	5.19	4.71	5.19	4.72	4.21	5.98	5.24	5.37	5.11	5.81	5.07	5.34	5.59	5.4	5.94	6.13	5.97
TCF4	6.54	6.66	7.29	6.32	5.35	7.75	6.57	6.72	6.76	6.04	6.72	7.27	5.55	7.26	6.96	7.71	6.99	8.05	6.75	7.47	6.7	7.39	6.36	6.87	7.08	5.63	5.88	7.08	6.57	6.71	7.12	6	7.1	5.12	5.6	6.15	5.81	6.14	5.91	6.09	5.84	5.64	5.7	5.76	5.87	5.02	5.5	5.5	6.16
TCF7	4.85	6.26	3.96	5.85	5.98	6.19	5.04	4.68	4.4	5.73	5.09	5.27	6.81	5.57	3.69	5.37	6.44	5.32	6.75	5.26	5.51	6.62	5.65	5.47	5.42	6.72	6.79	6.05	4.88	5.39	5.4	5.46	5.08	6.86	5.9	5.76	5.98	6.55	6.55	5.92	5.37	6.3	6.16	6.56	5.67	5.85	5.88	6.77	7.03
TFRC	4.5	5.82	4.3	4.58	5.38	4.33	5.04	3.95	4.18	6.48	4.09	3.99	4.47	3.94	3.24	3.72	3	3.29	3.4	3.68	2.18	3.76	4.14	5.07	3.22	6.56	2.55	2.89	3.69	4.63	4.38	3.59	3.12	3.47	5.43	7.21	5.45	4.78	5.45	5.73	4.63	4.94	4.98	5.15	5.55	6.08	4.84	5.24	5.07
TGFB1	5.3	5.01	6.35	5.15	4.77	5.65	5.35	5.88	5.77	5.14	6.11	6.07	4.63	5.3	3.69	5.85	3.67	5.38	4.32	6.16	6.19	4.9	4.63	5.31	6.34	4.56	4.05	6.17	6.22	5.17	5.26	5.26	6.11	4.54	5.75	5.46	5.87	5.72	5.4	5.41	5.94	5.47	5.15	5.65	5.59	5.29	5.25	4.98	4.89
TGFBI	7.17	7.22	7.29	6.27	6.24	6.42	6.1	7.03	7.1	7.92	6.85	5.74	5.12	5.44	6.87	7	3.67	6.55	3.4	5.71	4.24	3.98	5.43	4.94	5.64	6.01	4.5	6.98	7.27	7.43	5.98	6.42	6.51	3.47	6.08	7.6	6.78	5.53	7.07	6.39	6.73	5.25	6.57	5.44	6.14	6.7	5.17	5.5	5.16
TGFBR1	5.12	4.66	6.19	4.71	2.37	5.12	4.67	4.98	4.75	5.45	4.84	5.27	5.29	5.39	4.68	5.66	5.97	5.59	5.03	4.9	3.39	5.12	5.43	4.72	4.52	4.7	5.42	5.1	5.04	5.43	5.4	5.37	5.78	5.78	6.74	5.87	6.45	6.14	6.6	6.45	6.64	6.77	6.81	6.29	6.56	6.18	6.64	5.36	6.25
TGFBR2	7.2	6.4	7.1	6.66	6.07	6.91	7.8	7.39	7.2	7.1	7.56	8.44	5.5	7.75	6.53	7.35	5.21	7.31	4.9	7.71	7.95	7.29	6.55	6.66	7.98	5.48	6	7.8	7.2	6.42	7.83	7	6.32	4.56	6.5	5.8	6.69	6.61	6.26	6.45	6.72	6.28	5.49	6.32	6.45	6.56	6.68	5.5	5.65
THY1	5.6	4.85	6.91	5.38	5.6	6.45	6.02	6.72	5.32	5.87	4.93	5.27	5.29	5.06	5.58	5.62	6.96	6.88	4.16	6.44	3.89	6.34	5.38	5.47	3.61	5.71	5.17	6.75	6.61	6.28	6.49	4.86	6.14	6.21	7.47	7.78	7.43	7.74	6.09	7.33	7.6	9.18	6.04	8.8	8.1	8.43	7.34	6.35	6.81
TICAM1	4.97	4.55	4.66	3.44	4.05	4.8	4.45	3.95	4.4	4.86	4.2	3.48	4.47	4.85	3.24	4.8	4.24	4.78	3.07	4.9	4.44	4.97	3.67	4.33	5.02	3.7	4.89	4.03	4.8	4.53	4.38	4.46	4.34	5.21	5.88	5.76	5.66	5.06	5.16	5.51	5.11	5.53	5.55	5.69	5.82	5.16	5.38	4.48	4.83
TIGIT	4.71	3.54	3.7	5.65	3.91	5	4.67	3.52	3.67	4.54	4.01	3.74	6.6	4.71	5.78	4.24	5.71	3.29	6.26	4.71	4.07	4.3	6.09	5.47	4.04	6.67	6.07	4.16	3.6	5.19	4.71	5.17	4.14	6.61	5	6.08	4.72	5.35	5.48	5.01	4.8	5.26	5.44	4.87	5.12	5.85	4.46	5.5	5.53
TIRAP	4.57	4.69	4.04	3.56	3.73	3.82	3.18	3.72	4.09	5.04	3.12	3.99	5.05	4.1	3.24	3.94	4.24	3.53	5.51	3.51	4.67	1.84	3.67	2.83	4.71	3.96	3.72	3.79	4.07	4.2	4.38	4.28	4.14	4.66	4.51	4.98	4.88	4.29	4.18	4.93	4	3.93	5.22	4.51	4.41	4.18	4.6	4.98	4.19
TLR1	4.04	2.99	4.5	3.94	4.05	2.94	2.8	3.29	4.7	4.09	4.09	3.74	3.16	4.34	3.69	4.58	4.41	4.14	3.68	3.96	3.65	3.76	3.2	3.93	4.41	3.4	3.51	3.26	4.95	3.9	3.57	4.74	3.76	4.68	4.51	4.9	4.88	4.49	5.11	4.84	5.11	4.84	4.9	5.08	5.01	4.82	4.39	4.66	5.21
TLR2	3.18	4.02	4.39	3.7	4.3	3.7	2.8	4.51	5	3.86	3.84	4.65	4.07	4.43	3.95	4.04	2.56	5.12	4.16	4.07	5.01	3.76	4.07	4.51	4.94	4.7	2.1	3.68	4.07	3.08	3.57	3.93	3.62	3.6	4.71	4.88	4.44	4.06	4.48	4.13	5.43	4.51	3.72	4.19	4.41	4.59	4.6	3.49	4.77
TLR3	4.89	4.79	4.39	4.71	3.91	4.13	5.04	5.14	4.48	4.44	4.93	5.16	5.12	3.81	4.95	4.16	5.21	4.78	4.66	5.35	5.24	5.23	4.48	5.25	5.42	6.04	5.3	4.99	3.94	4.81	4.97	4.09	3.32	5.64	4.39	5.78	5	4.78	4.18	4.85	3.34	4.31	4.19	3.77	4.18	4.29	5.29	4.05	4.03
TLR4	5.62	5.86	5.31	6.16	5.59	5.78	5.77	6.1	5.65	5.49	5.56	5.63	4.98	4.85	6.28	5.62	4.99	5.95	6.26	5.71	6.7	6.29	5.3	6.03	6.08	5.5	5.78	6.17	4.99	5.2	5.21	5.5	4.72	5.68	5	5.31	5.07	5.06	4.62	5.27	5.11	5.39	5.44	5.44	5.62	5.58	5.29	4.84	4.89
TLR5	2.82	2.99	2.45	3.27	2.83	2.35	3.74	3.72	3.44	3.6	3.12	2.85	2.41	3.58	4.18	3.09	3.67	3.1	3.07	2.2	4.07	4.15	3.35	3.09	3.22	3.7	3.15	3.12	2.53	2.81	2.63	3.54	3.62	2.6	4.51	5.04	5.07	4.16	3.76	4.61	4.13	4.36	4.7	4.51	4.08	4.48	4.84	4.05	4.28
TLR7	5.07	3.31	4.6	6.86	6.09	5.24	3.5	2.82	2.46	5.6	3.44	4.24	8.78	5.92	5.39	5.41	7.33	4.01	7.61	4.71	4.67	3.76	6.72	6.34	3.22	7.2	6.69	4.16	4.35	5.88	5.35	5.04	5.88	6.96	4.64	5.4	5.35	6.14	5.52	5.54	4.92	5.73	6.48	4.62	6.02	6.45	5.06	8.21	6.5
TLR8	2.82	2.99	3.7	3.7	3.91	2.73	3.18	2.82	4.09	3.1	3.53	3.74	4.07	4.25	1.76	3.59	4.41	3.29	3.68	2.2	3.11	3.14	3.35	1.92	2.65	1.43	3.94	3.92	4.26	3.69	3.77	3.74	4.58	4.54	3.83	4.23	4.21	4.2	4.52	3.35	4.31	4.82	4.98	3.3	3.63	4.38	4.67	4.98	4.83
TLR9	3.64	3.31	3.84	4.83	5.5	4.98	3.18	3.52	3.97	5.04	4.2	4.65	5.12	5.3	5.58	4.58	5.43	4.53	6.75	4.43	4.86	5.64	5.6	4.14	3.92	4.96	5.75	4.39	4.88	5.05	4.71	5.19	4.72	6.11	5.04	4.36	5.17	5.57	5.05	4.85	5.21	5.53	5.7	4.31	4.97	5.91	4.96	5.97	6.08
TMEM173	5.6	5.48	5.1	4.05	4.71	5.3	4.6	4.98	5.22	4.71	5.21	6.25	3.67	4.34	5.1	4.28	3.67	5.45	3.4	6.16	5.24	3.52	4.21	5.01	5.37	5.3	4.45	5.1	5.22	4.99	4.97	4.24	4.72	3.07	5.1	4.63	4.88	3.85	4.94	5	4.68	4.36	3.52	4.66	4.63	4.48	4.39	4.05	2.95
TNF	3.53	2.99	3.84	4.4	4.59	3.97	2.36	3.95	4.18	3.39	3.94	3.18	4.74	4.43	5.1	3.23	3.67	3.53	5.47	4.71	4.67	3.63	4.71	4.43	3.78	4.56	4.5	4.16	4.18	4.73	2.63	4.44	3.96	4.94	4.07	5.01	3.67	3.93	4.39	4.18	4.13	4.08	4.8	3.77	4.08	4.48	3.69	4.66	3.43
TNFAIP3	6.26	6.34	6.1	5.42	5.87	6.36	6.03	7.1	6.6	5.73	6.02	5.5	5.12	5.79	6.21	6.33	5.86	6.21	5.12	6.81	6.45	6.69	6.23	6.21	5.88	6.01	5.47	6.25	6.68	5.84	6.29	5.65	6.75	5.4	4.77	6.3	5.56	6.1	6.3	5.55	6.04	6.06	5.95	5.84	5.76	5.4	5.68	5.63	5.84
TNFRSF10C	3.32	4.27	1.7	3.06	2.37	3.67	4.53	2.82	2.92	4.09	3.12	3.74	4.29	3.41	3.69	3.09	3.87	3.89	3.68	0.92	3.65	3.14	2.92	3.09	3.22	3.4	1.54	2.62	3.2	3.3	2.82	3.16	2.92	3.27	4.07	5.08	2.88	4.4	3.76	4.21	4	3.64	3.07	3.3	4	4.38	3.01	5.11	4.19
TNFRSF13C	3	3.54	2.1	3.7	3.5	3.09	3.5	3.52	3.67	4.09	3.12	2.52	4.07	3.71	3.24	3.72	3.67	2.65	2.55	2.53	2.69	2.97	3.99	2.83	2.65	3.7	3.33	3.53	3.2	3.3	3.47	3.4	3.96	4.29	4.16	3.62	2.88	4.42	3.87	4.44	4.31	4.46	3.72	4.87	4.89	4.18	3.84	5.11	4.36
TNFRSF14	5.66	6.23	5.61	5.58	6.23	6	6.18	6.27	5.77	5.87	6	5.63	4.47	5.23	5.78	4.96	4.84	5.59	6.42	4.97	6.5	5.78	5.96	5.51	5.93	5.81	4.71	5.49	5.27	5.63	5.55	4.91	4.87	4.2	6.25	6.9	6.9	6.14	5.72	6.92	6.08	6.15	6.71	6.96	7.12	6.4	6.29	4.84	6.4
TNFRSF17	4.18	4.79	3.96	4.17	2.83	4.58	4.45	4.24	2.92	4.44	3.69	3.48	2.83	5.16	5.58	4.04	5.35	4.29	4.16	3.96	3.65	4.64	5.01	3.09	4.04	4.56	5.65	4.56	4.42	4.69	4.2	4.74	4.87	5.88	5.15	4.54	5.61	5.63	5.38	5.74	5.11	5.47	5.95	5.11	5.27	5.82	5.29	6.21	5.91
TNFRSF1B	4.4	4.89	4.3	4.9	3.5	3.82	4.27	4.24	5.32	4.33	5.21	3.74	3.67	3.71	3.95	4.44	3	4.53	1.3	4.9	3.65	3.14	2.37	2.46	4.52	5.05	3.15	2.32	4.42	3.62	3.29	4.59	3.96	2.36	NA	NA	NA	NA	NA	NA	NA	NA	NA	NA	NA	NA	NA	NA	NA
TNFRSF4	2.38	4.02	4.13	1.96	3.19	2.94	1.59	4.24	2.92	3.1	2.44	2.85	2.41	2.6	3.69	3.59	3.67	3.89	3.93	3.38	2.69	2.97	3.67	1.92	3.61	4.4	3.41	2.62	3.47	2.57	2.82	2.62	2.92	2.81	NA	NA	NA	NA	NA	NA	NA	NA	NA	NA	NA	NA	NA	NA	NA
TNFRSF8	4.44	3.54	3.55	5.47	5.68	4.87	3.5	3.29	3.22	4.44	3.84	3.18	6.36	4.98	2.59	3.32	4.67	3.53	6.5	4.07	2.69	4.39	5.09	4.14	3.22	3	5.35	3.68	4.73	4.89	4.2	5.31	3.96	5.73	4.25	4.23	4.1	4.73	4.7	4.18	4.85	5.04	4.35	4.4	4.93	3.42	4.22	5.11	5.11
TNFRSF9	1.07	1.65	2.45	3.06	3.91	1.99	3.5	1.99	2.92	1.3	2.44	2.52	2.83	3.41	3.69	2.55	2.56	1.54	3.07	3.19	3.65	2.37	2.92	3.93	1.54	3.4	2.34	2.62	2.53	1.37	1.8	1.88	2.92	1.7	NA	NA	NA	NA	NA	NA	NA	NA	NA	NA	NA	NA	NA	NA	NA
TNFSF10	6.05	5.29	5.94	5.72	5.08	5.97	5.71	6.21	5.22	5.45	5.52	5.97	5.84	6.45	4.41	6.48	4.67	6.01	4.78	6.39	7.37	5.28	5.17	5.21	6.34	5.67	5.21	5.95	6.75	5.93	5.72	5.46	6.26	4.78	7.54	6.81	7.57	7.4	7.6	7.27	7.41	7.17	7.72	7.37	7.31	7.25	7.7	6.7	7.4
TNFSF11	1.99	4.02	2.8	3.44	4.3	1.99	4.45	2.82	3.83	2.71	3.33	4.24	3.42	2.27	4.68	1.22	2.56	3.89	4.48	2.83	4.44	2.16	2.74	3.7	3.78	4.4	2.78	2.89	2.07	3.08	2.82	1.37	2.7	2.04	NA	NA	NA	NA	NA	NA	NA	NA	NA	NA	NA	NA	NA	NA	NA
TNFSF12	5.22	6.1	4.04	5.3	3.73	5.75	5.93	6.1	5.22	4.8	5.37	4.24	3.89	3.17	2.59	4.66	3.67	4.78	3.4	4.9	4.44	3.76	3.35	5.71	4.04	4.2	3.51	5.55	4.48	4.04	5.26	3.73	3.32	2.36	5.52	5.88	5.43	4.45	4.8	5.83	5.37	4.01	4.08	5.28	5.35	5.02	5.21	3.76	3.91
TNFSF13B	4.06	4.18	4.21	3.06	3.73	3.09	4.38	3.95	3.22	4.09	4.01	4.44	4.29	4.92	3.24	2.99	2.13	3.53	2.55	2.53	3.89	3.52	3.89	3.5	4.04	3	4.37	2.32	4.71	4.47	3.29	4.41	4.14	4.12	5.19	5.04	4.36	3.67	4.8	4.94	4.63	4.66	5.07	4.4	4.35	5.16	4.04	4.05	4.77
TNFSF15	3.98	3.31	4.04	3.94	4.05	4.18	3.18	2.82	4.48	4.44	3.12	4.92	5.84	5.06	4.95	4.28	5.43	3.29	3.93	3.51	2.69	4.48	5.65	3.7	3.78	3.96	5.59	4.25	4.18	5.43	4.52	4.56	5	6.18	6.19	5.52	6.08	5.81	5.73	5.47	5.11	5.88	6.2	6.2	5.43	6.24	5.58	6.13	5.65
TNFSF4	5.02	5.01	4.13	5.62	5.08	5.45	3.95	5.14	4.09	4.09	4.58	3.18	7.51	6.35	5.95	5.56	6.44	4.53	6.14	5.35	4.24	5.87	6.29	5.31	4.52	4.2	7.08	4.92	5.12	5.3	5.78	5.6	6.11	7.2	5.67	5.25	4.96	6.5	5.64	5.81	5.75	6.37	6.31	5.65	5.39	6.28	5.68	6.94	6.64
TNFSF8	2.61	3.31	3.14	3.44	3.91	2.62	2.8	3.95	3.22	3.39	2.2	3.18	3.42	2.6	4.68	3.09	3.67	3.53	4.32	3.38	3.89	2.81	1.7	3.7	3.22	3.7	2.78	2.62	3.11	3.18	2.36	3.21	3.12	2.6	NA	NA	NA	NA	NA	NA	NA	NA	NA	NA	NA	NA	NA	NA	NA
TOLLIP	6	6.15	4.72	5.19	5.52	6.03	4.91	5.94	5	5.65	5.21	5.63	6.43	5.68	5.39	4.89	5.35	5.78	6.66	5.49	4.24	5.46	6.55	6.07	5.1	5.36	6.02	5.95	5.3	5.74	5.64	5.79	5.28	6.63	6.69	6.64	6.47	6.31	5.75	6.73	6.59	6.87	6.24	6.73	6.77	6.52	6.47	7.52	6.21
TP53	5.15	5.3	4.66	3.7	3.91	4.83	4.96	4.98	5	5.22	4.09	4.44	3.16	4.1	3.95	4.58	4.24	5.7	4.16	4.71	5.01	4.48	4.95	4.51	5.37	5.1	4	4.56	4.55	4.42	4.38	3.9	4.34	3.27	5.49	6.26	5.4	5	5.64	5.43	4.92	5.23	4.49	5.28	5.32	5.02	5.47	4.84	4.53
TRAF1	5.81	5.59	5.22	5.96	4.53	6.96	5.59	5.14	4.7	5.41	5.66	5.27	5.71	6.19	5.1	5.76	6.31	5.7	4.9	4.97	4.24	5.6	5.76	3.28	5.64	4.96	5.9	4.92	5.4	6.17	5.72	5.11	6.51	7	5.6	6.02	6.12	6.58	6.67	6.03	5.57	6.3	6.67	5.69	5.76	6.04	6.14	6.85	6.57
TRAF2	4.1	4.02	5.1	4.4	4.66	4.21	5.17	4.98	5	4.09	5	3.99	3.67	4.71	4.41	4.37	4.55	4.94	3.07	5.19	3.11	5.6	3.2	4.78	5.21	3.4	3.9	4.56	4.55	4.42	4.71	3.76	5.08	3.74	5.23	4.54	5.81	4.93	5.26	5.69	5.63	5.28	4.9	5.28	5.67	5.16	5.68	4.98	5.35
TRAF3	6.51	6.26	5.82	7.13	6.31	6.5	6	5.94	5	6.84	5.15	5.38	5.95	6.62	5.25	5.27	5.71	5.22	6.39	4.71	4.86	5.23	6.09	5.71	4.71	6.08	6.26	5.9	5.37	6.81	5.72	6.54	6.32	6.81	5.88	6.7	6.51	6.29	6.83	6.09	5.63	5.9	6.64	5.94	6.2	6.08	6.01	7.37	6.33
TRAF4	5.35	5.09	4.5	5.85	4.77	5.8	5.29	4.98	4.48	5.01	4.65	4.92	5.6	4.85	5.39	4.8	5.43	4.29	4.48	5.1	5.81	5.46	5.47	5.07	5.02	5.17	6.66	5.15	5.66	5.43	5.94	5	5.28	6.44	6.85	7.12	6.67	6.79	6.45	6.62	6.75	6.67	7.55	6.86	6.75	6.18	6.71	6.35	6.99
TRAF5	5.76	5.66	4.04	5.62	4.18	5.49	5.52	5.14	4.64	5.04	5.52	4.44	3.16	2.6	3.95	4.44	2.56	4.41	7.1	3.84	4.67	3.89	3.52	3.28	4.52	3.7	4.27	5.84	4.26	4.81	5.4	4.28	3.12	2.6	3.83	6.32	4.1	3.4	5.11	5.05	4.58	3.31	3.52	4.31	4.46	3.82	4.39	4.48	2.33
TRAF6	6.66	6.18	6.66	6.82	6.76	7.1	6.94	6.1	6.19	6.41	6.85	6.44	7	7.86	6.96	7.43	8.01	7	6.24	6.76	6.92	8.14	7.31	6.15	7.24	6.35	7.59	7.04	7.1	7.02	7.51	7.13	6.75	7.75	7.6	7.29	6.83	8.05	7.43	7.66	7.34	7.6	7.85	7.47	7.45	7.15	7.29	7.93	8.18
TYK2	5.97	5.93	5.66	4.77	5.87	5.6	5.94	5.79	5.9	5.22	5.48	4.92	4.86	4.34	4.95	4.58	3.67	5.78	3.68	5.1	4.44	3.98	4.95	5.85	5.1	6.17	4.84	5.37	4.75	5.48	4.64	5.09	5.37	2.04	5.67	5.98	6.45	4.78	5.81	6.15	5.67	4.56	5.84	5.92	5.9	5.25	5.38	4.66	4.03
UBE2L3	4.74	5.18	4.39	4.17	4.47	4.66	4.74	3.95	4.4	4.97	4.29	4.84	3.89	3.41	4.68	4.16	3.36	4.53	5.7	3.68	4.07	4.84	4.71	3.5	4.52	4.56	4.78	4.03	4.6	4.47	3.67	4.38	4.14	4.88	6.01	5.52	5.43	4.73	4.66	5.14	5.32	5.34	4.9	5.6	5.39	5.97	5	4.05	4.03
VCAM1	6.41	4.97	6.14	5.12	5.68	6.75	5.35	6.21	5.96	5.87	6.15	6.07	5.43	7.2	5.39	5.88	5.21	5.51	5.61	5.78	6.19	4.74	5.17	4.56	5.1	4.7	5.87	5.37	6.41	7.04	6.2	5.26	5.74	5.9	6.72	6.08	7.06	6.61	7.63	6.14	6.91	7.03	6.96	6.77	6.87	6.4	6.29	6.41	6.5
VTN	2.61	4.02	2.8	3.7	1.49	2.73	3.5	2.82	2.46	3.6	2.67	2.52	3.67	3.41	3.69	2.25	4.41	2.36	3.68	2.83	3.39	3.14	3.74	3.28	2.65	3	3.25	3.12	3.29	2.96	3.06	3.35	2.36	3.99	5.23	3.25	4.44	3.74	3.69	3.08	4.13	3.82	4.08	4.19	4.46	3.64	4.14	4.05	4.53
XBP1	5.56	6.19	4.86	4.97	5.46	5.33	6.1	5.69	6.19	5.53	5.37	6.07	4.74	5.23	5.39	5.32	4.67	5.78	3.93	5.97	4.67	4.15	5.17	6.19	6.34	6.22	3.72	5.87	4.95	4.85	5.64	4.04	6.32	4.12	6.78	5.73	6.58	6.7	6.85	5.98	6.84	6.8	6.52	6.69	6.43	6.73	6.81	4.66	5.91
XCL1	4.78	4.35	4.3	7.27	6.76	6	4.38	4.24	3.44	5.66	4.2	4.44	7.75	7.15	8.29	5.38	8.29	3.89	8.56	4.32	4.67	6.62	7.35	7.27	3.22	5.48	7.98	4.92	4.53	6.48	6.11	6.33	5.42	8.67	6.19	3.62	4.72	6.55	5.91	5.57	5.32	6.64	6.86	5.22	5.82	7.09	5.29	8.92	7.2
XCR1	3.53	3.31	4.3	4.58	4.41	4.66	4.13	0.92	3.83	3.86	3.69	3.48	6.15	4.25	4.18	3.9	4.84	4.66	6.61	3.84	4.24	5.46	5.4	5.21	4.41	5.53	6	4.39	3.29	4.81	3.77	4.01	4.24	5.25	3.98	4.88	4.54	4.2	4.48	3.43	4.45	4.64	4.7	4.08	4.18	4.68	4.31	5.83	5.16
ZAP70	4.26	4.11	3.55	4.77	6.09	3.97	3.74	5.3	4.4	2.71	4.65	4.24	3.89	5.35	3.69	5.17	6.08	4.66	4.16	4.9	5.24	4.39	3.74	4.14	4.28	4.7	4.96	6.08	4.26	3.69	4.85	4.01	4.72	4.94	4.39	4.85	5.07	5.79	5.82	5.53	5.11	5.47	6.37	5.39	5.76	5.09	5.25	6.13	5.84
ZBTB16	6.77	9.69	7.92	4.17	2.83	3.9	10.38	8.24	7.98	5.94	8.34	5.89	2.83	6.01	5.58	5.9	7.47	4.29	6.94	3.19	5.24	7.35	9.94	6.91	4.41	3.4	6.22	7.98	4.48	5.48	9.24	4.5	8.24	4.85	5.96	8.7	7.7	2.48	2.7	8.99	6.52	7.26	4.35	4.08	7.14	3.42	5.06	3.76	3.85
ZEB1	6.16	6	6.55	5.69	5.38	6.54	6.69	6.95	6.15	5.94	7.47	7.09	5.89	6.99	6.71	6.96	6.68	7.86	5.24	6.35	7.18	8.34	6.99	5.85	7.51	4.56	5.47	6.87	6.34	6.01	6.34	5.74	6.42	5.07	5.72	4.93	5.45	6.79	5.79	6.18	5.91	6.39	6.27	5.79	6.28	5.76	5.68	6.21	6.37
[truncated: 49 more columns]

## Sheet: sampleinfo
title	geo_accession	source_name_ch1	organism_ch1	characteristics_ch1	Sex	age (yrs)	characteristics_ch1.3	characteristics_ch1.4	characteristics_ch1.5	molecule_ch1	extract_protocol_ch1	label_ch1	label_protocol_ch1	taxid_ch1	hyb_protocol	scan_protocol	description	description.1	data_processing	platform_id	contact_name	contact_email	contact_phone	contact_department	contact_institute	contact_address	contact_city	contact_state	contact_zip/postal_code	contact_country	supplementary_file	data_row_count	age (yrs):ch1	clinical response group:ch1	ln class:ch1	proteinuria (g/24hr):ch1	serum creatinine (mg/dl):ch1	Sex:ch1
Patient 1, First biopsy, Glomeruli [X1A.G_3]	GSM6030648	LN	Homo sapiens	ln class: Class IV	Male	37	proteinuria (g/24hr): 2	serum creatinine (mg/dl): 0.7	clinical response group: complete response	total RNA	Formalin-fixed and paraffin-embedded (FFPE) kidney biopsy tissue was cut into 6-7 10渭m sections. After deparaffinization, all available glomeruli and TI were separated by laser microdissection (PALM MicroBeam, Zeiss Labs, Germany), captured and digested with proteinase K. From each biopsy, a median glomerular cross-sectional area of 1,250,000ü渭m2, corresponding to 40 glomerular cross-sections, an…	not provided	To ensure there was similar starting material for each sample for expression analysis, pre-amplification conditions were determined by GAPDH RT-PCR cycle number. Extracted RNA was submitted for expression analysis using the Nanostring nCounter庐 GX human Immunology Panel (Nanostring Technologies, Seattle, WA). The panel consists of 579 immune response genes, 6 positive controls, 6 negative control…	9606	Reporter and Capture probes against 579 mRNAs were obtained from Nanostring Technologies Seattle, WA. Data were collected and analyzed using the nCounter Digital Analyzer.	The number of barcodes hybridized to specific RNA targets on cartridges were directly counted by the nCounter Digital Analyzer with 579 fields of view setting.	Nanostring RAW 2.xlsx	Glomerular RNA was extracted by laser microdissection and submitted for nanostring analysis	For nanostring data, raw counts were normalized to the positive spike-in controls and then log2 transformed. To reduce technical bias, genes with an expression level below the mean plus two standard deviations of the negative controls were filtered out. Quantile normalization was applied to the remaining transcripts (522 for glomeruli and 502 for TI). Linear mixed effect models were used to ident…	GPL21847	Samir,,Parikh	samir.parikh@osumc.edu	6142934997	Nephrology	Ohio State University	395 W 12th Avenu, -Address 2-	Columbus	OH	43210	USA	NONE	522	37	complete response	Class IV	2	0.7	M
Patient 2, First Biopsy, Glomeruli [X02AG_5]	GSM6030649	LN	Homo sapiens	ln class: Class IV	FeMale	26	proteinuria (g/24hr): 4	serum creatinine (mg/dl): 0.5	clinical response group: complete response	total RNA	Formalin-fixed and paraffin-embedded (FFPE) kidney biopsy tissue was cut into 6-7 10渭m sections. After deparaffinization, all available glomeruli and TI were separated by laser microdissection (PALM MicroBeam, Zeiss Labs, Germany), captured and digested with proteinase K. From each biopsy, a median glomerular cross-sectional area of 1,250,000ü渭m2, corresponding to 40 glomerular cross-sections, an…	not provided	To ensure there was similar starting material for each sample for expression analysis, pre-amplification conditions were determined by GAPDH RT-PCR cycle number. Extracted RNA was submitted for expression analysis using the Nanostring nCounter庐 GX human Immunology Panel (Nanostring Technologies, Seattle, WA). The panel consists of 579 immune response genes, 6 positive controls, 6 negative control…	9606	Reporter and Capture probes against 579 mRNAs were obtained from Nanostring Technologies Seattle, WA. Data were collected and analyzed using the nCounter Digital Analyzer.	The number of barcodes hybridized to specific RNA targets on cartridges were directly counted by the nCounter Digital Analyzer with 579 fields of view setting.	Nanostring RAW 3.xlsx	Glomerular RNA was extracted by laser microdissection and submitted for nanostring analysis	For nanostring data, raw counts were normalized to the positive spike-in controls and then log2 transformed. To reduce technical bias, genes with an expression level below the mean plus two standard deviations of the negative controls were filtered out. Quantile normalization was applied to the remaining transcripts (522 for glomeruli and 502 for TI). Linear mixed effect models were used to ident…	GPL21847	Samir,,Parikh	samir.parikh@osumc.edu	6142934997	Nephrology	Ohio State University	395 W 12th Avenu, -Address 2-	Columbus	OH	43210	USA	NONE	522	26	complete response	Class IV	4	0.5	F
Patient 6, first biopsy, glomeruli [X06AG_1]	GSM6030650	LN	Homo sapiens	ln class: Class IV	FeMale	28	proteinuria (g/24hr): 4	serum creatinine (mg/dl): 0.5	clinical response group: complete response	total RNA	Formalin-fixed and paraffin-embedded (FFPE) kidney biopsy tissue was cut into 6-7 10渭m sections. After deparaffinization, all available glomeruli and TI were separated by laser microdissection (PALM MicroBeam, Zeiss Labs, Germany), captured and digested with proteinase K. From each biopsy, a median glomerular cross-sectional area of 1,250,000ü渭m2, corresponding to 40 glomerular cross-sections, an…	not provided	To ensure there was similar starting material for each sample for expression analysis, pre-amplification conditions were determined by GAPDH RT-PCR cycle number. Extracted RNA was submitted for expression analysis using the Nanostring nCounter庐 GX human Immunology Panel (Nanostring Technologies, Seattle, WA). The panel consists of 579 immune response genes, 6 positive controls, 6 negative control…	9606	Reporter and Capture probes against 579 mRNAs were obtained from Nanostring Technologies Seattle, WA. Data were collected and analyzed using the nCounter Digital Analyzer.	The number of barcodes hybridized to specific RNA targets on cartridges were directly counted by the nCounter Digital Analyzer with 579 fields of view setting.	Nanostring RAW 9.xlsx	Glomerular RNA was extracted by laser microdissection and submitted for nanostring analysis	For nanostring data, raw counts were normalized to the positive spike-in controls and then log2 transformed. To reduce technical bias, genes with an expression level below the mean plus two standard deviations of the negative controls were filtered out. Quantile normalization was applied to the remaining transcripts (522 for glomeruli and 502 for TI). Linear mixed effect models were used to ident…	GPL21847	Samir,,Parikh	samir.parikh@osumc.edu	6142934997	Nephrology	Ohio State University	395 W 12th Avenu, -Address 2-	Columbus	OH	43210	USA	NONE	522	28	complete response	Class IV	4	0.5	F
Patient 7, first biopsy, glomeruli [X7AG_7]	GSM6030651	LN	Homo sapiens	ln class: Mixed (III/IV+V)	FeMaleeMaleal	32	proteinuria (g/24hr): 3.5	serum creatinine (mg/dl): 0.5	clinical response group: complete response	total RNA	Formalin-fixed and paraffin-embedded (FFPE) kidney biopsy tissue was cut into 6-7 10渭m sections. After deparaffinization, all available glomeruli and TI were separated by laser microdissection (PALM MicroBeam, Zeiss Labs, Germany), captured and digested with proteinase K. From each biopsy, a median glomerular cross-sectional area of 1,250,000ü渭m2, corresponding to 40 glomerular cross-sections, an…	not provided	To ensure there was similar starting material for each sample for expression analysis, pre-amplification conditions were determined by GAPDH RT-PCR cycle number. Extracted RNA was submitted for expression analysis using the Nanostring nCounter庐 GX human Immunology Panel (Nanostring Technologies, Seattle, WA). The panel consists of 579 immune response genes, 6 positive controls, 6 negative control…	9606	Reporter and Capture probes against 579 mRNAs were obtained from Nanostring Technologies Seattle, WA. Data were collected and analyzed using the nCounter Digital Analyzer.	The number of barcodes hybridized to specific RNA targets on cartridges were directly counted by the nCounter Digital Analyzer with 579 fields of view setting.	Nanostring RAW 5.xlsx	Glomerular RNA was extracted by laser microdissection and submitted for nanostring analysis	For nanostring data, raw counts were normalized to the positive spike-in controls and then log2 transformed. To reduce technical bias, genes with an expression level below the mean plus two standard deviations of the negative controls were filtered out. Quantile normalization was applied to the remaining transcripts (522 for glomeruli and 502 for TI). Linear mixed effect models were used to ident…	GPL21847	Samir,,Parikh	samir.parikh@osumc.edu	6142934997	Nephrology	Ohio State University	395 W 12th Avenu, -Address 2-	Columbus	OH	43210	USA	NONE	522	32	complete response	Mixed (III/IV+V)	3.5	0.5	F
patient 11, first biopsy, glomeruli [X11AG_5]	GSM6030652	LN	Homo sapiens	ln class: Class III	FeMale	29	proteinuria (g/24hr): 2	serum creatinine (mg/dl): 0.7	clinical response group: complete response	total RNA	Formalin-fixed and paraffin-embedded (FFPE) kidney biopsy tissue was cut into 6-7 10渭m sections. After deparaffinization, all available glomeruli and TI were separated by laser microdissection (PALM MicroBeam, Zeiss Labs, Germany), captured and digested with proteinase K. From each biopsy, a median glomerular cross-sectional area of 1,250,000ü渭m2, corresponding to 40 glomerular cross-sections, an…	not provided	To ensure there was similar starting material for each sample for expression analysis, pre-amplification conditions were determined by GAPDH RT-PCR cycle number. Extracted RNA was submitted for expression analysis using the Nanostring nCounter庐 GX human Immunology Panel (Nanostring Technologies, Seattle, WA). The panel consists of 579 immune response genes, 6 positive controls, 6 negative control…	9606	Reporter and Capture probes against 579 mRNAs were obtained from Nanostring Technologies Seattle, WA. Data were collected and analyzed using the nCounter Digital Analyzer.	The number of barcodes hybridized to specific RNA targets on cartridges were directly counted by the nCounter Digital Analyzer with 579 fields of view setting.	Nanostring RAW 3.xlsx	Glomerular RNA was extracted by laser microdissection and submitted for nanostring analysis	For nanostring data, raw counts were normalized to the positive spike-in controls and then log2 transformed. To reduce technical bias, genes with an expression level below the mean plus two standard deviations of the negative controls were filtered out. Quantile normalization was applied to the remaining transcripts (522 for glomeruli and 502 for TI). Linear mixed effect models were used to ident…	GPL21847	Samir,,Parikh	samir.parikh@osumc.edu	6142934997	Nephrology	Ohio State University	395 W 12th Avenu, -Address 2-	Columbus	OH	43210	USA	NONE	522	29	complete response	Class III	2	0.7	F
Patient 12, first biopsy, glomeruli [X12AG_8]	GSM6030653	LN	Homo sapiens	ln class: Mixed (III/IV+V)	FeMale	30	proteinuria (g/24hr): 5	serum creatinine (mg/dl): 1.2	clinical response group: complete response	total RNA	Formalin-fixed and paraffin-embedded (FFPE) kidney biopsy tissue was cut into 6-7 10渭m sections. After deparaffinization, all available glomeruli and TI were separated by laser microdissection (PALM MicroBeam, Zeiss Labs, Germany), captured and digested with proteinase K. From each biopsy, a median glomerular cross-sectional area of 1,250,000ü渭m2, corresponding to 40 glomerular cross-sections, an…	not provided	To ensure there was similar starting material for each sample for expression analysis, pre-amplification conditions were determined by GAPDH RT-PCR cycle number. Extracted RNA was submitted for expression analysis using the Nanostring nCounter庐 GX human Immunology Panel (Nanostring Technologies, Seattle, WA). The panel consists of 579 immune response genes, 6 positive controls, 6 negative control…	9606	Reporter and Capture probes against 579 mRNAs were obtained from Nanostring Technologies Seattle, WA. Data were collected and analyzed using the nCounter Digital Analyzer.	The number of barcodes hybridized to specific RNA targets on cartridges were directly counted by the nCounter Digital Analyzer with 579 fields of view setting.	Nanostring RAW 6.xlsx	Glomerular RNA was extracted by laser microdissection and submitted for nanostring analysis	For nanostring data, raw counts were normalized to the positive spike-in controls and then log2 transformed. To reduce technical bias, genes with an expression level below the mean plus two standard deviations of the negative controls were filtered out. Quantile normalization was applied to the remaining transcripts (522 for glomeruli and 502 for TI). Linear mixed effect models were used to ident…	GPL21847	Samir,,Parikh	samir.parikh@osumc.edu	6142934997	Nephrology	Ohio State University	395 W 12th Avenu, -Address 2-	Columbus	OH	43210	USA	NONE	522	30	complete response	Mixed (III/IV+V)	5	1.2	F
Patient 15, first biopsy, glomeruli [X15AG_5]	GSM6030654	LN	Homo sapiens	ln class: Mixed (III/IV+V)	Male	32	proteinuria (g/24hr): 2.4	serum creatinine (mg/dl): 0.8	clinical response group: complete response	total RNA	Formalin-fixed and paraffin-embedded (FFPE) kidney biopsy tissue was cut into 6-7 10渭m sections. After deparaffinization, all available glomeruli and TI were separated by laser microdissection (PALM MicroBeam, Zeiss Labs, Germany), captured and digested with proteinase K. From each biopsy, a median glomerular cross-sectional area of 1,250,000ü渭m2, corresponding to 40 glomerular cross-sections, an…	not provided	To ensure there was similar starting material for each sample for expression analysis, pre-amplification conditions were determined by GAPDH RT-PCR cycle number. Extracted RNA was submitted for expression analysis using the Nanostring nCounter庐 GX human Immunology Panel (Nanostring Technologies, Seattle, WA). The panel consists of 579 immune response genes, 6 positive controls, 6 negative control…	9606	Reporter and Capture probes against 579 mRNAs were obtained from Nanostring Technologies Seattle, WA. Data were collected and analyzed using the nCounter Digital Analyzer.	The number of barcodes hybridized to specific RNA targets on cartridges were directly counted by the nCounter Digital Analyzer with 579 fields of view setting.	Nanostring RAW 3.xlsx	Glomerular RNA was extracted by laser microdissection and submitted for nanostring analysis	For nanostring data, raw counts were normalized to the positive spike-in controls and then log2 transformed. To reduce technical bias, genes with an expression level below the mean plus two standard deviations of the negative controls were filtered out. Quantile normalization was applied to the remaining transcripts (522 for glomeruli and 502 for TI). Linear mixed effect models were used to ident…	GPL21847	Samir,,Parikh	samir.parikh@osumc.edu	6142934997	Nephrology	Ohio State University	395 W 12th Avenu, -Address 2-	Columbus	OH	43210	USA	NONE	522	32	complete response	Mixed (III/IV+V)	2.4	0.8	M
patient 20, first biopsy, glomeruli [X20AG_8]	GSM6030655	LN	Homo sapiens	ln class: Class III	FeMale	32	proteinuria (g/24hr): 1.2	serum creatinine (mg/dl): 0.7	clinical response group: complete response	total RNA	Formalin-fixed and paraffin-embedded (FFPE) kidney biopsy tissue was cut into 6-7 10渭m sections. After deparaffinization, all available glomeruli and TI were separated by laser microdissection (PALM MicroBeam, Zeiss Labs, Germany), captured and digested with proteinase K. From each biopsy, a median glomerular cross-sectional area of 1,250,000ü渭m2, corresponding to 40 glomerular cross-sections, an…	not provided	To ensure there was similar starting material for each sample for expression analysis, pre-amplification conditions were determined by GAPDH RT-PCR cycle number. Extracted RNA was submitted for expression analysis using the Nanostring nCounter庐 GX human Immunology Panel (Nanostring Technologies, Seattle, WA). The panel consists of 579 immune response genes, 6 positive controls, 6 negative control…	9606	Reporter and Capture probes against 579 mRNAs were obtained from Nanostring Technologies Seattle, WA. Data were collected and analyzed using the nCounter Digital Analyzer.	The number of barcodes hybridized to specific RNA targets on cartridges were directly counted by the nCounter Digital Analyzer with 579 fields of view setting.	Nanostring RAW 6.xlsx	Glomerular RNA was extracted by laser microdissection and submitted for nanostring analysis	For nanostring data, raw counts were normalized to the positive spike-in controls and then log2 transformed. To reduce technical bias, genes with an expression level below the mean plus two standard deviations of the negative controls were filtered out. Quantile normalization was applied to the remaining transcripts (522 for glomeruli and 502 for TI). Linear mixed effect models were used to ident…	GPL21847	Samir,,Parikh	samir.parikh@osumc.edu	6142934997	Nephrology	Ohio State University	395 W 12th Avenu, -Address 2-	Columbus	OH	43210	USA	NONE	522	32	complete response	Class III	1.2	0.7	F
patient 23, first biopsy, glomeruli [X23AG_9]	GSM6030656	LN	Homo sapiens	ln class: Mixed (III/IV+V)	FeMale	22	proteinuria (g/24hr): 6.12	serum creatinine (mg/dl): 0.8	clinical response group: complete response	total RNA	Formalin-fixed and paraffin-embedded (FFPE) kidney biopsy tissue was cut into 6-7 10渭m sections. After deparaffinization, all available glomeruli and TI were separated by laser microdissection (PALM MicroBeam, Zeiss Labs, Germany), captured and digested with proteinase K. From each biopsy, a median glomerular cross-sectional area of 1,250,000ü渭m2, corresponding to 40 glomerular cross-sections, an…	not provided	To ensure there was similar starting material for each sample for expression analysis, pre-amplification conditions were determined by GAPDH RT-PCR cycle number. Extracted RNA was submitted for expression analysis using the Nanostring nCounter庐 GX human Immunology Panel (Nanostring Technologies, Seattle, WA). The panel consists of 579 immune response genes, 6 positive controls, 6 negative control…	9606	Reporter and Capture probes against 579 mRNAs were obtained from Nanostring Technologies Seattle, WA. Data were collected and analyzed using the nCounter Digital Analyzer.	The number of barcodes hybridized to specific RNA targets on cartridges were directly counted by the nCounter Digital Analyzer with 579 fields of view setting.	Nanostring RAW 7.xlsx	Glomerular RNA was extracted by laser microdissection and submitted for nanostring analysis	For nanostring data, raw counts were normalized to the positive spike-in controls and then log2 transformed. To reduce technical bias, genes with an expression level below the mean plus two standard deviations of the negative controls were filtered out. Quantile normalization was applied to the remaining transcripts (522 for glomeruli and 502 for TI). Linear mixed effect models were used to ident…	GPL21847	Samir,,Parikh	samir.parikh@osumc.edu	6142934997	Nephrology	Ohio State University	395 W 12th Avenu, -Address 2-	Columbus	OH	43210	USA	NONE	522	22	complete response	Mixed (III/IV+V)	6.12	0.8	F
patient 26, first biopsy, glomeruli [X26AG_2]	GSM6030657	LN	Homo sapiens	ln class: Class III	FeMale	27	proteinuria (g/24hr): 1.3	serum creatinine (mg/dl): 0.8	clinical response group: complete response	total RNA	Formalin-fixed and paraffin-embedded (FFPE) kidney biopsy tissue was cut into 6-7 10渭m sections. After deparaffinization, all available glomeruli and TI were separated by laser microdissection (PALM MicroBeam, Zeiss Labs, Germany), captured and digested with proteinase K. From each biopsy, a median glomerular cross-sectional area of 1,250,000ü渭m2, corresponding to 40 glomerular cross-sections, an…	not provided	To ensure there was similar starting material for each sample for expression analysis, pre-amplification conditions were determined by GAPDH RT-PCR cycle number. Extracted RNA was submitted for expression analysis using the Nanostring nCounter庐 GX human Immunology Panel (Nanostring Technologies, Seattle, WA). The panel consists of 579 immune response genes, 6 positive controls, 6 negative control…	9606	Reporter and Capture probes against 579 mRNAs were obtained from Nanostring Technologies Seattle, WA. Data were collected and analyzed using the nCounter Digital Analyzer.	The number of barcodes hybridized to specific RNA targets on cartridges were directly counted by the nCounter Digital Analyzer with 579 fields of view setting.	Nanostring RAW 10.xlsx	Glomerular RNA was extracted by laser microdissection and submitted for nanostring analysis	For nanostring data, raw counts were normalized to the positive spike-in controls and then log2 transformed. To reduce technical bias, genes with an expression level below the mean plus two standard deviations of the negative controls were filtered out. Quantile normalization was applied to the remaining transcripts (522 for glomeruli and 502 for TI). Linear mixed effect models were used to ident…	GPL21847	Samir,,Parikh	samir.parikh@osumc.edu	6142934997	Nephrology	Ohio State University	395 W 12th Avenu, -Address 2-	Columbus	OH	43210	USA	NONE	522	27	complete response	Class III	1.3	0.8	F
patient 30, first biopsy, glomeruli [X30AG]	GSM6030658	LN	Homo sapiens	ln class: Class IV	FeMale	50	proteinuria (g/24hr): 1	serum creatinine (mg/dl): 0.9	clinical response group: complete response	total RNA	Formalin-fixed and paraffin-embedded (FFPE) kidney biopsy tissue was cut into 6-7 10渭m sections. After deparaffinization, all available glomeruli and TI were separated by laser microdissection (PALM MicroBeam, Zeiss Labs, Germany), captured and digested with proteinase K. From each biopsy, a median glomerular cross-sectional area of 1,250,000ü渭m2, corresponding to 40 glomerular cross-sections, an…	not provided	To ensure there was similar starting material for each sample for expression analysis, pre-amplification conditions were determined by GAPDH RT-PCR cycle number. Extracted RNA was submitted for expression analysis using the Nanostring nCounter庐 GX human Immunology Panel (Nanostring Technologies, Seattle, WA). The panel consists of 579 immune response genes, 6 positive controls, 6 negative control…	9606	Reporter and Capture probes against 579 mRNAs were obtained from Nanostring Technologies Seattle, WA. Data were collected and analyzed using the nCounter Digital Analyzer.	The number of barcodes hybridized to specific RNA targets on cartridges were directly counted by the nCounter Digital Analyzer with 579 fields of view setting.	Nanostring RAW 4.xlsx	Glomerular RNA was extracted by laser microdissection and submitted for nanostring analysis	For nanostring data, raw counts were normalized to the positive spike-in controls and then log2 transformed. To reduce technical bias, genes with an expression level below the mean plus two standard deviations of the negative controls were filtered out. Quantile normalization was applied to the remaining transcripts (522 for glomeruli and 502 for TI). Linear mixed effect models were used to ident…	GPL21847	Samir,,Parikh	samir.parikh@osumc.edu	6142934997	Nephrology	Ohio State University	395 W 12th Avenu, -Address 2-	Columbus	OH	43210	USA	NONE	522	50	complete response	Class IV	1	0.9	F
patient 32, first biopsy, glomeruli [X32AG]	GSM6030659	LN	Homo sapiens	ln class: Mixed (III/IV+V)	FeMale	22	proteinuria (g/24hr): 2.8	serum creatinine (mg/dl): 0.7	clinical response group: complete response	total RNA	Formalin-fixed and paraffin-embedded (FFPE) kidney biopsy tissue was cut into 6-7 10渭m sections. After deparaffinization, all available glomeruli and TI were separated by laser microdissection (PALM MicroBeam, Zeiss Labs, Germany), captured and digested with proteinase K. From each biopsy, a median glomerular cross-sectional area of 1,250,000ü渭m2, corresponding to 40 glomerular cross-sections, an…	not provided	To ensure there was similar starting material for each sample for expression analysis, pre-amplification conditions were determined by GAPDH RT-PCR cycle number. Extracted RNA was submitted for expression analysis using the Nanostring nCounter庐 GX human Immunology Panel (Nanostring Technologies, Seattle, WA). The panel consists of 579 immune response genes, 6 positive controls, 6 negative control…	9606	Reporter and Capture probes against 579 mRNAs were obtained from Nanostring Technologies Seattle, WA. Data were collected and analyzed using the nCounter Digital Analyzer.	The number of barcodes hybridized to specific RNA targets on cartridges were directly counted by the nCounter Digital Analyzer with 579 fields of view setting.	Nanostring RAW 4.xlsx	Glomerular RNA was extracted by laser microdissection and submitted for nanostring analysis	For nanostring data, raw counts were normalized to the positive spike-in controls and then log2 transformed. To reduce technical bias, genes with an expression level below the mean plus two standard deviations of the negative controls were filtered out. Quantile normalization was applied to the remaining transcripts (522 for glomeruli and 502 for TI). Linear mixed effect models were used to ident…	GPL21847	Samir,,Parikh	samir.parikh@osumc.edu	6142934997	Nephrology	Ohio State University	395 W 12th Avenu, -Address 2-	Columbus	OH	43210	USA	NONE	522	22	complete response	Mixed (III/IV+V)	2.8	0.7	F
patient 37, first biopsy, glomeruli [X37AG_5]	GSM6030660	LN	Homo sapiens	ln class: Class IV	FeMale	25	proteinuria (g/24hr): 1.2	serum creatinine (mg/dl): 0.5	clinical response group: complete response	total RNA	Formalin-fixed and paraffin-embedded (FFPE) kidney biopsy tissue was cut into 6-7 10渭m sections. After deparaffinization, all available glomeruli and TI were separated by laser microdissection (PALM MicroBeam, Zeiss Labs, Germany), captured and digested with proteinase K. From each biopsy, a median glomerular cross-sectional area of 1,250,000ü渭m2, corresponding to 40 glomerular cross-sections, an…	not provided	To ensure there was similar starting material for each sample for expression analysis, pre-amplification conditions were determined by GAPDH RT-PCR cycle number. Extracted RNA was submitted for expression analysis using the Nanostring nCounter庐 GX human Immunology Panel (Nanostring Technologies, Seattle, WA). The panel consists of 579 immune response genes, 6 positive controls, 6 negative control…	9606	Reporter and Capture probes against 579 mRNAs were obtained from Nanostring Technologies Seattle, WA. Data were collected and analyzed using the nCounter Digital Analyzer.	The number of barcodes hybridized to specific RNA targets on cartridges were directly counted by the nCounter Digital Analyzer with 579 fields of view setting.	Nanostring RAW 3.xlsx	Glomerular RNA was extracted by laser microdissection and submitted for nanostring analysis	For nanostring data, raw counts were normalized to the positive spike-in controls and then log2 transformed. To reduce technical bias, genes with an expression level below the mean plus two standard deviations of the negative controls were filtered out. Quantile normalization was applied to the remaining transcripts (522 for glomeruli and 502 for TI). Linear mixed effect models were used to ident…	GPL21847	Samir,,Parikh	samir.parikh@osumc.edu	6142934997	Nephrology	Ohio State University	395 W 12th Avenu, -Address 2-	Columbus	OH	43210	USA	NONE	522	25	complete response	Class IV	1.2	0.5	F
patient 39, first biopsy, glomeruli [X39AG_1]	GSM6030661	LN	Homo sapiens	ln class: Class IV	FeMale	42	proteinuria (g/24hr): 2.2	serum creatinine (mg/dl): 0.4	clinical response group: complete response	total RNA	Formalin-fixed and paraffin-embedded (FFPE) kidney biopsy tissue was cut into 6-7 10渭m sections. After deparaffinization, all available glomeruli and TI were separated by laser microdissection (PALM MicroBeam, Zeiss Labs, Germany), captured and digested with proteinase K. From each biopsy, a median glomerular cross-sectional area of 1,250,000ü渭m2, corresponding to 40 glomerular cross-sections, an…	not provided	To ensure there was similar starting material for each sample for expression analysis, pre-amplification conditions were determined by GAPDH RT-PCR cycle number. Extracted RNA was submitted for expression analysis using the Nanostring nCounter庐 GX human Immunology Panel (Nanostring Technologies, Seattle, WA). The panel consists of 579 immune response genes, 6 positive controls, 6 negative control…	9606	Reporter and Capture probes against 579 mRNAs were obtained from Nanostring Technologies Seattle, WA. Data were collected and analyzed using the nCounter Digital Analyzer.	The number of barcodes hybridized to specific RNA targets on cartridges were directly counted by the nCounter Digital Analyzer with 579 fields of view setting.	Nanostring RAW 9.xlsx	Glomerular RNA was extracted by laser microdissection and submitted for nanostring analysis	For nanostring data, raw counts were normalized to the positive spike-in controls and then log2 transformed. To reduce technical bias, genes with an expression level below the mean plus two standard deviations of the negative controls were filtered out. Quantile normalization was applied to the remaining transcripts (522 for glomeruli and 502 for TI). Linear mixed effect models were used to ident…	GPL21847	Samir,,Parikh	samir.parikh@osumc.edu	6142934997	Nephrology	Ohio State University	395 W 12th Avenu, -Address 2-	Columbus	OH	43210	USA	NONE	522	42	complete response	Class IV	2.2	0.4	F
patient 48, first biopsy, glomeruli [X48AG_9]	GSM6030662	LN	Homo sapiens	ln class: Class III	Male	32	proteinuria (g/24hr): 1.0	serum creatinine (mg/dl): 0.7	clinical response group: complete response	total RNA	Formalin-fixed and paraffin-embedded (FFPE) kidney biopsy tissue was cut into 6-7 10渭m sections. After deparaffinization, all available glomeruli and TI were separated by laser microdissection (PALM MicroBeam, Zeiss Labs, Germany), captured and digested with proteinase K. From each biopsy, a median glomerular cross-sectional area of 1,250,000ü渭m2, corresponding to 40 glomerular cross-sections, an…	not provided	To ensure there was similar starting material for each sample for expression analysis, pre-amplification conditions were determined by GAPDH RT-PCR cycle number. Extracted RNA was submitted for expression analysis using the Nanostring nCounter庐 GX human Immunology Panel (Nanostring Technologies, Seattle, WA). The panel consists of 579 immune response genes, 6 positive controls, 6 negative control…	9606	Reporter and Capture probes against 579 mRNAs were obtained from Nanostring Technologies Seattle, WA. Data were collected and analyzed using the nCounter Digital Analyzer.	The number of barcodes hybridized to specific RNA targets on cartridges were directly counted by the nCounter Digital Analyzer with 579 fields of view setting.	Nanostring RAW 7.xlsx	Glomerular RNA was extracted by laser microdissection and submitted for nanostring analysis	For nanostring data, raw counts were normalized to the positive spike-in controls and then log2 transformed. To reduce technical bias, genes with an expression level below the mean plus two standard deviations of the negative controls were filtered out. Quantile normalization was applied to the remaining transcripts (522 for glomeruli and 502 for TI). Linear mixed effect models were used to ident…	GPL21847	Samir,,Parikh	samir.parikh@osumc.edu	6142934997	Nephrology	Ohio State University	395 W 12th Avenu, -Address 2-	Columbus	OH	43210	USA	NONE	522	32	complete response	Class III	1	0.7	M
patient 49, first biopsy, glomeruli [X49AG_10]	GSM6030663	LN	Homo sapiens	ln class: Class IV	FeMale	22	proteinuria (g/24hr): 1.5	serum creatinine (mg/dl): 0.7	clinical response group: complete response	total RNA	Formalin-fixed and paraffin-embedded (FFPE) kidney biopsy tissue was cut into 6-7 10渭m sections. After deparaffinization, all available glomeruli and TI were separated by laser microdissection (PALM MicroBeam, Zeiss Labs, Germany), captured and digested with proteinase K. From each biopsy, a median glomerular cross-sectional area of 1,250,000ü渭m2, corresponding to 40 glomerular cross-sections, an…	not provided	To ensure there was similar starting material for each sample for expression analysis, pre-amplification conditions were determined by GAPDH RT-PCR cycle number. Extracted RNA was submitted for expression analysis using the Nanostring nCounter庐 GX human Immunology Panel (Nanostring Technologies, Seattle, WA). The panel consists of 579 immune response genes, 6 positive controls, 6 negative control…	9606	Reporter and Capture probes against 579 mRNAs were obtained from Nanostring Technologies Seattle, WA. Data were collected and analyzed using the nCounter Digital Analyzer.	The number of barcodes hybridized to specific RNA targets on cartridges were directly counted by the nCounter Digital Analyzer with 579 fields of view setting.	Nanostring RAW 8.xlsx	Glomerular RNA was extracted by laser microdissection and submitted for nanostring analysis	For nanostring data, raw counts were normalized to the positive spike-in controls and then log2 transformed. To reduce technical bias, genes with an expression level below the mean plus two standard deviations of the negative controls were filtered out. Quantile normalization was applied to the remaining transcripts (522 for glomeruli and 502 for TI). Linear mixed effect models were used to ident…	GPL21847	Samir,,Parikh	samir.parikh@osumc.edu	6142934997	Nephrology	Ohio State University	395 W 12th Avenu, -Address 2-	Columbus	OH	43210	USA	NONE	522	22	complete response	Class IV	1.5	0.7	F
patient 50, first biopsy, glomeruli [X50AG_10]	GSM6030664	LN	Homo sapiens	ln class: Class IV	FeMale	18	proteinuria (g/24hr): 2.6	serum creatinine (mg/dl): 0.8	clinical response group: complete response	total RNA	Formalin-fixed and paraffin-embedded (FFPE) kidney biopsy tissue was cut into 6-7 10渭m sections. After deparaffinization, all available glomeruli and TI were separated by laser microdissection (PALM MicroBeam, Zeiss Labs, Germany), captured and digested with proteinase K. From each biopsy, a median glomerular cross-sectional area of 1,250,000ü渭m2, corresponding to 40 glomerular cross-sections, an…	not provided	To ensure there was similar starting material for each sample for expression analysis, pre-amplification conditions were determined by GAPDH RT-PCR cycle number. Extracted RNA was submitted for expression analysis using the Nanostring nCounter庐 GX human Immunology Panel (Nanostring Technologies, Seattle, WA). The panel consists of 579 immune response genes, 6 positive controls, 6 negative control…	9606	Reporter and Capture probes against 579 mRNAs were obtained from Nanostring Technologies Seattle, WA. Data were collected and analyzed using the nCounter Digital Analyzer.	The number of barcodes hybridized to specific RNA targets on cartridges were directly counted by the nCounter Digital Analyzer with 579 fields of view setting.	Nanostring RAW 8.xlsx	Glomerular RNA was extracted by laser microdissection and submitted for nanostring analysis	For nanostring data, raw counts were normalized to the positive spike-in controls and then log2 transformed. To reduce technical bias, genes with an expression level below the mean plus two standard deviations of the negative controls were filtered out. Quantile normalization was applied to the remaining transcripts (522 for glomeruli and 502 for TI). Linear mixed effect models were used to ident…	GPL21847	Samir,,Parikh	samir.parikh@osumc.edu	6142934997	Nephrology	Ohio State University	395 W 12th Avenu, -Address 2-	Columbus	OH	43210	USA	NONE	522	18	complete response	Class IV	2.6	0.8	F
patient 51, first biopsy, glomeruli [X51AG_7]	GSM6030665	LN	Homo sapiens	ln class: Class IV	FeMale	26	proteinuria (g/24hr): 1.3	serum creatinine (mg/dl): 0.8	clinical response group: complete response	total RNA	Formalin-fixed and paraffin-embedded (FFPE) kidney biopsy tissue was cut into 6-7 10渭m sections. After deparaffinization, all available glomeruli and TI were separated by laser microdissection (PALM MicroBeam, Zeiss Labs, Germany), captured and digested with proteinase K. From each biopsy, a median glomerular cross-sectional area of 1,250,000ü渭m2, corresponding to 40 glomerular cross-sections, an…	not provided	To ensure there was similar starting material for each sample for expression analysis, pre-amplification conditions were determined by GAPDH RT-PCR cycle number. Extracted RNA was submitted for expression analysis using the Nanostring nCounter庐 GX human Immunology Panel (Nanostring Technologies, Seattle, WA). The panel consists of 579 immune response genes, 6 positive controls, 6 negative control…	9606	Reporter and Capture probes against 579 mRNAs were obtained from Nanostring Technologies Seattle, WA. Data were collected and analyzed using the nCounter Digital Analyzer.	The number of barcodes hybridized to specific RNA targets on cartridges were directly counted by the nCounter Digital Analyzer with 579 fields of view setting.	Nanostring RAW 5.xlsx	Glomerular RNA was extracted by laser microdissection and submitted for nanostring analysis	For nanostring data, raw counts were normalized to the positive spike-in controls and then log2 transformed. To reduce technical bias, genes with an expression level below the mean plus two standard deviations of the negative controls were filtered out. Quantile normalization was applied to the remaining transcripts (522 for glomeruli and 502 for TI). Linear mixed effect models were used to ident…	GPL21847	Samir,,Parikh	samir.parikh@osumc.edu	6142934997	Nephrology	Ohio State University	395 W 12th Avenu, -Address 2-	Columbus	OH	43210	USA	NONE	522	26	complete response	Class IV	1.3	0.8	F
patient 55, first biopsy, glomeruli [X55AG_9]	GSM6030666	LN	Homo sapiens	ln class: Class III	FeMale	26	proteinuria (g/24hr): 2.0	serum creatinine (mg/dl): 0.9	clinical response group: complete response	total RNA	Formalin-fixed and paraffin-embedded (FFPE) kidney biopsy tissue was cut into 6-7 10渭m sections. After deparaffinization, all available glomeruli and TI were separated by laser microdissection (PALM MicroBeam, Zeiss Labs, Germany), captured and digested with proteinase K. From each biopsy, a median glomerular cross-sectional area of 1,250,000ü渭m2, corresponding to 40 glomerular cross-sections, an…	not provided	To ensure there was similar starting material for each sample for expression analysis, pre-amplification conditions were determined by GAPDH RT-PCR cycle number. Extracted RNA was submitted for expression analysis using the Nanostring nCounter庐 GX human Immunology Panel (Nanostring Technologies, Seattle, WA). The panel consists of 579 immune response genes, 6 positive controls, 6 negative control…	9606	Reporter and Capture probes against 579 mRNAs were obtained from Nanostring Technologies Seattle, WA. Data were collected and analyzed using the nCounter Digital Analyzer.	The number of barcodes hybridized to specific RNA targets on cartridges were directly counted by the nCounter Digital Analyzer with 579 fields of view setting.	Nanostring RAW 7.xlsx	Glomerular RNA was extracted by laser microdissection and submitted for nanostring analysis	For nanostring data, raw counts were normalized to the positive spike-in controls and then log2 transformed. To reduce technical bias, genes with an expression level below the mean plus two standard deviations of the negative controls were filtered out. Quantile normalization was applied to the remaining transcripts (522 for glomeruli and 502 for TI). Linear mixed effect models were used to ident…	GPL21847	Samir,,Parikh	samir.parikh@osumc.edu	6142934997	Nephrology	Ohio State University	395 W 12th Avenu, -Address 2-	Columbus	OH	43210	USA	NONE	522	26	complete response	Class III	2	0.9	F
patient 58, first biopsy, glomeruli [X58AG_8]	GSM6030667	LN	Homo sapiens	ln class: Class IV	FeMale	24	proteinuria (g/24hr): 6.0	serum creatinine (mg/dl): 0.7	clinical response group: complete response	total RNA	Formalin-fixed and paraffin-embedded (FFPE) kidney biopsy tissue was cut into 6-7 10渭m sections. After deparaffinization, all available glomeruli and TI were separated by laser microdissection (PALM MicroBeam, Zeiss Labs, Germany), captured and digested with proteinase K. From each biopsy, a median glomerular cross-sectional area of 1,250,000ü渭m2, corresponding to 40 glomerular cross-sections, an…	not provided	To ensure there was similar starting material for each sample for expression analysis, pre-amplification conditions were determined by GAPDH RT-PCR cycle number. Extracted RNA was submitted for expression analysis using the Nanostring nCounter庐 GX human Immunology Panel (Nanostring Technologies, Seattle, WA). The panel consists of 579 immune response genes, 6 positive controls, 6 negative control…	9606	Reporter and Capture probes against 579 mRNAs were obtained from Nanostring Technologies Seattle, WA. Data were collected and analyzed using the nCounter Digital Analyzer.	The number of barcodes hybridized to specific RNA targets on cartridges were directly counted by the nCounter Digital Analyzer with 579 fields of view setting.	Nanostring RAW 6.xlsx	Glomerular RNA was extracted by laser microdissection and submitted for nanostring analysis	For nanostring data, raw counts were normalized to the positive spike-in controls and then log2 transformed. To reduce technical bias, genes with an expression level below the mean plus two standard deviations of the negative controls were filtered out. Quantile normalization was applied to the remaining transcripts (522 for glomeruli and 502 for TI). Linear mixed effect models were used to ident…	GPL21847	Samir,,Parikh	samir.parikh@osumc.edu	6142934997	Nephrology	Ohio State University	395 W 12th Avenu, -Address 2-	Columbus	OH	43210	USA	NONE	522	24	complete response	Class IV	6	0.7	F
patient 5, first biopsy, glomeruli [X5AG_7]	GSM6030668	LN	Homo sapiens	ln class: Class IV	Male	52	proteinuria (g/24hr): 2	serum creatinine (mg/dl): 1.5	clinical response group: No Response	total RNA	Formalin-fixed and paraffin-embedded (FFPE) kidney biopsy tissue was cut into 6-7 10渭m sections. After deparaffinization, all available glomeruli and TI were separated by laser microdissection (PALM MicroBeam, Zeiss Labs, Germany), captured and digested with proteinase K. From each biopsy, a median glomerular cross-sectional area of 1,250,000ü渭m2, corresponding to 40 glomerular cross-sections, an…	not provided	To ensure there was similar starting material for each sample for expression analysis, pre-amplification conditions were determined by GAPDH RT-PCR cycle number. Extracted RNA was submitted for expression analysis using the Nanostring nCounter庐 GX human Immunology Panel (Nanostring Technologies, Seattle, WA). The panel consists of 579 immune response genes, 6 positive controls, 6 negative control…	9606	Reporter and Capture probes against 579 mRNAs were obtained from Nanostring Technologies Seattle, WA. Data were collected and analyzed using the nCounter Digital Analyzer.	The number of barcodes hybridized to specific RNA targets on cartridges were directly counted by the nCounter Digital Analyzer with 579 fields of view setting.	Nanostring RAW 5.xlsx	Glomerular RNA was extracted by laser microdissection and submitted for nanostring analysis	For nanostring data, raw counts were normalized to the positive spike-in controls and then log2 transformed. To reduce technical bias, genes with an expression level below the mean plus two standard deviations of the negative controls were filtered out. Quantile normalization was applied to the remaining transcripts (522 for glomeruli and 502 for TI). Linear mixed effect models were used to ident…	GPL21847	Samir,,Parikh	samir.parikh@osumc.edu	6142934997	Nephrology	Ohio State University	395 W 12th Avenu, -Address 2-	Columbus	OH	43210	USA	NONE	522	52	No Response	Class IV	2	1.5	M
patient 10, first biopsy, glomeruli [X10AG]	GSM6030669	LN	Homo sapiens	ln class: Mixed (III/IV+V)	Male	23	proteinuria (g/24hr): 2	serum creatinine (mg/dl): 0.8	clinical response group: No Response	total RNA	Formalin-fixed and paraffin-embedded (FFPE) kidney biopsy tissue was cut into 6-7 10渭m sections. After deparaffinization, all available glomeruli and TI were separated by laser microdissection (PALM MicroBeam, Zeiss Labs, Germany), captured and digested with proteinase K. From each biopsy, a median glomerular cross-sectional area of 1,250,000ü渭m2, corresponding to 40 glomerular cross-sections, an…	not provided	To ensure there was similar starting material for each sample for expression analysis, pre-amplification conditions were determined by GAPDH RT-PCR cycle number. Extracted RNA was submitted for expression analysis using the Nanostring nCounter庐 GX human Immunology Panel (Nanostring Technologies, Seattle, WA). The panel consists of 579 immune response genes, 6 positive controls, 6 negative control…	9606	Reporter and Capture probes against 579 mRNAs were obtained from Nanostring Technologies Seattle, WA. Data were collected and analyzed using the nCounter Digital Analyzer.	The number of barcodes hybridized to specific RNA targets on cartridges were directly counted by the nCounter Digital Analyzer with 579 fields of view setting.	Nanostring RAW 4.xlsx	Glomerular RNA was extracted by laser microdissection and submitted for nanostring analysis	For nanostring data, raw counts were normalized to the positive spike-in controls and then log2 transformed. To reduce technical bias, genes with an expression level below the mean plus two standard deviations of the negative controls were filtered out. Quantile normalization was applied to the remaining transcripts (522 for glomeruli and 502 for TI). Linear mixed effect models were used to ident…	GPL21847	Samir,,Parikh	samir.parikh@osumc.edu	6142934997	Nephrology	Ohio State University	395 W 12th Avenu, -Address 2-	Columbus	OH	43210	USA	NONE	522	23	No Response	Mixed (III/IV+V)	2	0.8	M
patient 13, first biopsy, glomeruli [X13AG]	GSM6030670	LN	Homo sapiens	ln class: Class IV	FeMale	25	proteinuria (g/24hr): 1.2	serum creatinine (mg/dl): 0.6	clinical response group: No Response	total RNA	Formalin-fixed and paraffin-embedded (FFPE) kidney biopsy tissue was cut into 6-7 10渭m sections. After deparaffinization, all available glomeruli and TI were separated by laser microdissection (PALM MicroBeam, Zeiss Labs, Germany), captured and digested with proteinase K. From each biopsy, a median glomerular cross-sectional area of 1,250,000ü渭m2, corresponding to 40 glomerular cross-sections, an…	not provided	To ensure there was similar starting material for each sample for expression analysis, pre-amplification conditions were determined by GAPDH RT-PCR cycle number. Extracted RNA was submitted for expression analysis using the Nanostring nCounter庐 GX human Immunology Panel (Nanostring Technologies, Seattle, WA). The panel consists of 579 immune response genes, 6 positive controls, 6 negative control…	9606	Reporter and Capture probes against 579 mRNAs were obtained from Nanostring Technologies Seattle, WA. Data were collected and analyzed using the nCounter Digital Analyzer.	The number of barcodes hybridized to specific RNA targets on cartridges were directly counted by the nCounter Digital Analyzer with 579 fields of view setting.	Nanostring RAW 4.xlsx	Glomerular RNA was extracted by laser microdissection and submitted for nanostring analysis	For nanostring data, raw counts were normalized to the positive spike-in controls and then log2 transformed. To reduce technical bias, genes with an expression level below the mean plus two standard deviations of the negative controls were filtered out. Quantile normalization was applied to the remaining transcripts (522 for glomeruli and 502 for TI). Linear mixed effect models were used to ident…	GPL21847	Samir,,Parikh	samir.parikh@osumc.edu	6142934997	Nephrology	Ohio State University	395 W 12th Avenu, -Address 2-	Columbus	OH	43210	USA	NONE	522	25	No Response	Class IV	1.2	0.6	F
patient 17, first biopsy, glomeruli [X17AG_7]	GSM6030671	LN	Homo sapiens	ln class: Class III	FeMale	35	proteinuria (g/24hr): 1	serum creatinine (mg/dl): 0.5	clinical response group: No Response	total RNA	Formalin-fixed and paraffin-embedded (FFPE) kidney biopsy tissue was cut into 6-7 10渭m sections. After deparaffinization, all available glomeruli and TI were separated by laser microdissection (PALM MicroBeam, Zeiss Labs, Germany), captured and digested with proteinase K. From each biopsy, a median glomerular cross-sectional area of 1,250,000ü渭m2, corresponding to 40 glomerular cross-sections, an…	not provided	To ensure there was similar starting material for each sample for expression analysis, pre-amplification conditions were determined by GAPDH RT-PCR cycle number. Extracted RNA was submitted for expression analysis using the Nanostring nCounter庐 GX human Immunology Panel (Nanostring Technologies, Seattle, WA). The panel consists of 579 immune response genes, 6 positive controls, 6 negative control…	9606	Reporter and Capture probes against 579 mRNAs were obtained from Nanostring Technologies Seattle, WA. Data were collected and analyzed using the nCounter Digital Analyzer.	The number of barcodes hybridized to specific RNA targets on cartridges were directly counted by the nCounter Digital Analyzer with 579 fields of view setting.	Nanostring RAW 5.xlsx	Glomerular RNA was extracted by laser microdissection and submitted for nanostring analysis	For nanostring data, raw counts were normalized to the positive spike-in controls and then log2 transformed. To reduce technical bias, genes with an expression level below the mean plus two standard deviations of the negative controls were filtered out. Quantile normalization was applied to the remaining transcripts (522 for glomeruli and 502 for TI). Linear mixed effect models were used to ident…	GPL21847	Samir,,Parikh	samir.parikh@osumc.edu	6142934997	Nephrology	Ohio State University	395 W 12th Avenu, -Address 2-	Columbus	OH	43210	USA	NONE	522	35	No Response	Class III	1	0.5	F
patient 24, first biopsy, glomeruli [X24AG]	GSM6030672	LN	Homo sapiens	ln class: Class IV	Male	36	proteinuria (g/24hr): 1.7	serum creatinine (mg/dl): 0.8	clinical response group: No Response	total RNA	Formalin-fixed and paraffin-embedded (FFPE) kidney biopsy tissue was cut into 6-7 10渭m sections. After deparaffinization, all available glomeruli and TI were separated by laser microdissection (PALM MicroBeam, Zeiss Labs, Germany), captured and digested with proteinase K. From each biopsy, a median glomerular cross-sectional area of 1,250,000ü渭m2, corresponding to 40 glomerular cross-sections, an…	not provided	To ensure there was similar starting material for each sample for expression analysis, pre-amplification conditions were determined by GAPDH RT-PCR cycle number. Extracted RNA was submitted for expression analysis using the Nanostring nCounter庐 GX human Immunology Panel (Nanostring Technologies, Seattle, WA). The panel consists of 579 immune response genes, 6 positive controls, 6 negative control…	9606	Reporter and Capture probes against 579 mRNAs were obtained from Nanostring Technologies Seattle, WA. Data were collected and analyzed using the nCounter Digital Analyzer.	The number of barcodes hybridized to specific RNA targets on cartridges were directly counted by the nCounter Digital Analyzer with 579 fields of view setting.	Nanostring RAW 4.xlsx	Glomerular RNA was extracted by laser microdissection and submitted for nanostring analysis	For nanostring data, raw counts were normalized to the positive spike-in controls and then log2 transformed. To reduce technical bias, genes with an expression level below the mean plus two standard deviations of the negative controls were filtered out. Quantile normalization was applied to the remaining transcripts (522 for glomeruli and 502 for TI). Linear mixed effect models were used to ident…	GPL21847	Samir,,Parikh	samir.parikh@osumc.edu	6142934997	Nephrology	Ohio State University	395 W 12th Avenu, -Address 2-	Columbus	OH	43210	USA	NONE	522	36	No Response	Class IV	1.7	0.8	M
patient 27, first biopsy, glomeruli [X27AG_9]	GSM6030673	LN	Homo sapiens	ln class: Class III	Male	36	proteinuria (g/24hr): 1.8	serum creatinine (mg/dl): 0.7	clinical response group: No Response	total RNA	Formalin-fixed and paraffin-embedded (FFPE) kidney biopsy tissue was cut into 6-7 10渭m sections. After deparaffinization, all available glomeruli and TI were separated by laser microdissection (PALM MicroBeam, Zeiss Labs, Germany), captured and digested with proteinase K. From each biopsy, a median glomerular cross-sectional area of 1,250,000ü渭m2, corresponding to 40 glomerular cross-sections, an…	not provided	To ensure there was similar starting material for each sample for expression analysis, pre-amplification conditions were determined by GAPDH RT-PCR cycle number. Extracted RNA was submitted for expression analysis using the Nanostring nCounter庐 GX human Immunology Panel (Nanostring Technologies, Seattle, WA). The panel consists of 579 immune response genes, 6 positive controls, 6 negative control…	9606	Reporter and Capture probes against 579 mRNAs were obtained from Nanostring Technologies Seattle, WA. Data were collected and analyzed using the nCounter Digital Analyzer.	The number of barcodes hybridized to specific RNA targets on cartridges were directly counted by the nCounter Digital Analyzer with 579 fields of view setting.	Nanostring RAW 7.xlsx	Glomerular RNA was extracted by laser microdissection and submitted for nanostring analysis	For nanostring data, raw counts were normalized to the positive spike-in controls and then log2 transformed. To reduce technical bias, genes with an expression level below the mean plus two standard deviations of the negative controls were filtered out. Quantile normalization was applied to the remaining transcripts (522 for glomeruli and 502 for TI). Linear mixed effect models were used to ident…	GPL21847	Samir,,Parikh	samir.parikh@osumc.edu	6142934997	Nephrology	Ohio State University	395 W 12th Avenu, -Address 2-	Columbus	OH	43210	USA	NONE	522	36	No Response	Class III	1.8	0.7	M
patient 38, first biopsy, glomeruli [X38A.G_3]	GSM6030674	LN	Homo sapiens	ln class: Class III	FeMale	21	proteinuria (g/24hr): 0.9	serum creatinine (mg/dl): 0.7	clinical response group: No Response	total RNA	Formalin-fixed and paraffin-embedded (FFPE) kidney biopsy tissue was cut into 6-7 10渭m sections. After deparaffinization, all available glomeruli and TI were separated by laser microdissection (PALM MicroBeam, Zeiss Labs, Germany), captured and digested with proteinase K. From each biopsy, a median glomerular cross-sectional area of 1,250,000ü渭m2, corresponding to 40 glomerular cross-sections, an…	not provided	To ensure there was similar starting material for each sample for expression analysis, pre-amplification conditions were determined by GAPDH RT-PCR cycle number. Extracted RNA was submitted for expression analysis using the Nanostring nCounter庐 GX human Immunology Panel (Nanostring Technologies, Seattle, WA). The panel consists of 579 immune response genes, 6 positive controls, 6 negative control…	9606	Reporter and Capture probes against 579 mRNAs were obtained from Nanostring Technologies Seattle, WA. Data were collected and analyzed using the nCounter Digital Analyzer.	The number of barcodes hybridized to specific RNA targets on cartridges were directly counted by the nCounter Digital Analyzer with 579 fields of view setting.	Nanostring RAW 2.xlsx	Glomerular RNA was extracted by laser microdissection and submitted for nanostring analysis	For nanostring data, raw counts were normalized to the positive spike-in controls and then log2 transformed. To reduce technical bias, genes with an expression level below the mean plus two standard deviations of the negative controls were filtered out. Quantile normalization was applied to the remaining transcripts (522 for glomeruli and 502 for TI). Linear mixed effect models were used to ident…	GPL21847	Samir,,Parikh	samir.parikh@osumc.edu	6142934997	Nephrology	Ohio State University	395 W 12th Avenu, -Address 2-	Columbus	OH	43210	USA	NONE	522	21	No Response	Class III	0.9	0.7	F
patient 14, first biopsy, glomeruli [X14AG_8]	GSM6030675	LN	Homo sapiens	ln class: Class IV	FeMale	21	proteinuria (g/24hr): 1.9	serum creatinine (mg/dl): 0.8	clinical response group: Partial Response	total RNA	Formalin-fixed and paraffin-embedded (FFPE) kidney biopsy tissue was cut into 6-7 10渭m sections. After deparaffinization, all available glomeruli and TI were separated by laser microdissection (PALM MicroBeam, Zeiss Labs, Germany), captured and digested with proteinase K. From each biopsy, a median glomerular cross-sectional area of 1,250,000ü渭m2, corresponding to 40 glomerular cross-sections, an…	not provided	To ensure there was similar starting material for each sample for expression analysis, pre-amplification conditions were determined by GAPDH RT-PCR cycle number. Extracted RNA was submitted for expression analysis using the Nanostring nCounter庐 GX human Immunology Panel (Nanostring Technologies, Seattle, WA). The panel consists of 579 immune response genes, 6 positive controls, 6 negative control…	9606	Reporter and Capture probes against 579 mRNAs were obtained from Nanostring Technologies Seattle, WA. Data were collected and analyzed using the nCounter Digital Analyzer.	The number of barcodes hybridized to specific RNA targets on cartridges were directly counted by the nCounter Digital Analyzer with 579 fields of view setting.	Nanostring RAW 6.xlsx	Glomerular RNA was extracted by laser microdissection and submitted for nanostring analysis	For nanostring data, raw counts were normalized to the positive spike-in controls and then log2 transformed. To reduce technical bias, genes with an expression level below the mean plus two standard deviations of the negative controls were filtered out. Quantile normalization was applied to the remaining transcripts (522 for glomeruli and 502 for TI). Linear mixed effect models were used to ident…	GPL21847	Samir,,Parikh	samir.parikh@osumc.edu	6142934997	Nephrology	Ohio State University	395 W 12th Avenu, -Address 2-	Columbus	OH	43210	USA	NONE	522	21	Partial Response	Class IV	1.9	0.8	F
patient 18, first biopsy, glomeruli [X18AG_2]	GSM6030676	LN	Homo sapiens	ln class: Class IV	FeMale	22	proteinuria (g/24hr): 5.9	serum creatinine (mg/dl): 1.7	clinical response group: Partial Response	total RNA	Formalin-fixed and paraffin-embedded (FFPE) kidney biopsy tissue was cut into 6-7 10渭m sections. After deparaffinization, all available glomeruli and TI were separated by laser microdissection (PALM MicroBeam, Zeiss Labs, Germany), captured and digested with proteinase K. From each biopsy, a median glomerular cross-sectional area of 1,250,000ü渭m2, corresponding to 40 glomerular cross-sections, an…	not provided	To ensure there was similar starting material for each sample for expression analysis, pre-amplification conditions were determined by GAPDH RT-PCR cycle number. Extracted RNA was submitted for expression analysis using the Nanostring nCounter庐 GX human Immunology Panel (Nanostring Technologies, Seattle, WA). The panel consists of 579 immune response genes, 6 positive controls, 6 negative control…	9606	Reporter and Capture probes against 579 mRNAs were obtained from Nanostring Technologies Seattle, WA. Data were collected and analyzed using the nCounter Digital Analyzer.	The number of barcodes hybridized to specific RNA targets on cartridges were directly counted by the nCounter Digital Analyzer with 579 fields of view setting.	Nanostring RAW 10.xlsx	Glomerular RNA was extracted by laser microdissection and submitted for nanostring analysis	For nanostring data, raw counts were normalized to the positive spike-in controls and then log2 transformed. To reduce technical bias, genes with an expression level below the mean plus two standard deviations of the negative controls were filtered out. Quantile normalization was applied to the remaining transcripts (522 for glomeruli and 502 for TI). Linear mixed effect models were used to ident…	GPL21847	Samir,,Parikh	samir.parikh@osumc.edu	6142934997	Nephrology	Ohio State University	395 W 12th Avenu, -Address 2-	Columbus	OH	43210	USA	NONE	522	22	Partial Response	Class IV	5.9	1.7	F
patient 21, first biopsy, glomeruli [X21AG_1]	GSM6030677	LN	Homo sapiens	ln class: Class IV	FeMale	42	proteinuria (g/24hr): 5	serum creatinine (mg/dl): 3.1	clinical response group: Partial Response	total RNA	Formalin-fixed and paraffin-embedded (FFPE) kidney biopsy tissue was cut into 6-7 10渭m sections. After deparaffinization, all available glomeruli and TI were separated by laser microdissection (PALM MicroBeam, Zeiss Labs, Germany), captured and digested with proteinase K. From each biopsy, a median glomerular cross-sectional area of 1,250,000ü渭m2, corresponding to 40 glomerular cross-sections, an…	not provided	To ensure there was similar starting material for each sample for expression analysis, pre-amplification conditions were determined by GAPDH RT-PCR cycle number. Extracted RNA was submitted for expression analysis using the Nanostring nCounter庐 GX human Immunology Panel (Nanostring Technologies, Seattle, WA). The panel consists of 579 immune response genes, 6 positive controls, 6 negative control…	9606	Reporter and Capture probes against 579 mRNAs were obtained from Nanostring Technologies Seattle, WA. Data were collected and analyzed using the nCounter Digital Analyzer.	The number of barcodes hybridized to specific RNA targets on cartridges were directly counted by the nCounter Digital Analyzer with 579 fields of view setting.	Nanostring RAW 9.xlsx	Glomerular RNA was extracted by laser microdissection and submitted for nanostring analysis	For nanostring data, raw counts were normalized to the positive spike-in controls and then log2 transformed. To reduce technical bias, genes with an expression level below the mean plus two standard deviations of the negative controls were filtered out. Quantile normalization was applied to the remaining transcripts (522 for glomeruli and 502 for TI). Linear mixed effect models were used to ident…	GPL21847	Samir,,Parikh	samir.parikh@osumc.edu	6142934997	Nephrology	Ohio State University	395 W 12th Avenu, -Address 2-	Columbus	OH	43210	USA	NONE	522	42	Partial Response	Class IV	5	3.1	F
patient 22, first biopsy, glomeruli [X22AG_10]	GSM6030678	LN	Homo sapiens	ln class: Class IV	FeMale	30	proteinuria (g/24hr): 2.2	serum creatinine (mg/dl): 1.1	clinical response group: Partial Response	total RNA	Formalin-fixed and paraffin-embedded (FFPE) kidney biopsy tissue was cut into 6-7 10渭m sections. After deparaffinization, all available glomeruli and TI were separated by laser microdissection (PALM MicroBeam, Zeiss Labs, Germany), captured and digested with proteinase K. From each biopsy, a median glomerular cross-sectional area of 1,250,000ü渭m2, corresponding to 40 glomerular cross-sections, an…	not provided	To ensure there was similar starting material for each sample for expression analysis, pre-amplification conditions were determined by GAPDH RT-PCR cycle number. Extracted RNA was submitted for expression analysis using the Nanostring nCounter庐 GX human Immunology Panel (Nanostring Technologies, Seattle, WA). The panel consists of 579 immune response genes, 6 positive controls, 6 negative control…	9606	Reporter and Capture probes against 579 mRNAs were obtained from Nanostring Technologies Seattle, WA. Data were collected and analyzed using the nCounter Digital Analyzer.	The number of barcodes hybridized to specific RNA targets on cartridges were directly counted by the nCounter Digital Analyzer with 579 fields of view setting.	Nanostring RAW 8.xlsx	Glomerular RNA was extracted by laser microdissection and submitted for nanostring analysis	For nanostring data, raw counts were normalized to the positive spike-in controls and then log2 transformed. To reduce technical bias, genes with an expression level below the mean plus two standard deviations of the negative controls were filtered out. Quantile normalization was applied to the remaining transcripts (522 for glomeruli and 502 for TI). Linear mixed effect models were used to ident…	GPL21847	Samir,,Parikh	samir.parikh@osumc.edu	6142934997	Nephrology	Ohio State University	395 W 12th Avenu, -Address 2-	Columbus	OH	43210	USA	NONE	522	30	Partial Response	Class IV	2.2	1.1	F
patient 28, first biopsy, glomeruli [X28AG_1]	GSM6030679	LN	Homo sapiens	ln class: Class IV	FeMale	18	proteinuria (g/24hr): 3.8	serum creatinine (mg/dl): 0.8	clinical response group: Partial Response	total RNA	Formalin-fixed and paraffin-embedded (FFPE) kidney biopsy tissue was cut into 6-7 10渭m sections. After deparaffinization, all available glomeruli and TI were separated by laser microdissection (PALM MicroBeam, Zeiss Labs, Germany), captured and digested with proteinase K. From each biopsy, a median glomerular cross-sectional area of 1,250,000ü渭m2, corresponding to 40 glomerular cross-sections, an…	not provided	To ensure there was similar starting material for each sample for expression analysis, pre-amplification conditions were determined by GAPDH RT-PCR cycle number. Extracted RNA was submitted for expression analysis using the Nanostring nCounter庐 GX human Immunology Panel (Nanostring Technologies, Seattle, WA). The panel consists of 579 immune response genes, 6 positive controls, 6 negative control…	9606	Reporter and Capture probes against 579 mRNAs were obtained from Nanostring Technologies Seattle, WA. Data were collected and analyzed using the nCounter Digital Analyzer.	The number of barcodes hybridized to specific RNA targets on cartridges were directly counted by the nCounter Digital Analyzer with 579 fields of view setting.	Nanostring RAW 9.xlsx	Glomerular RNA was extracted by laser microdissection and submitted for nanostring analysis	For nanostring data, raw counts were normalized to the positive spike-in controls and then log2 transformed. To reduce technical bias, genes with an expression level below the mean plus two standard deviations of the negative controls were filtered out. Quantile normalization was applied to the remaining transcripts (522 for glomeruli and 502 for TI). Linear mixed effect models were used to ident…	GPL21847	Samir,,Parikh	samir.parikh@osumc.edu	6142934997	Nephrology	Ohio State University	395 W 12th Avenu, -Address 2-	Columbus	OH	43210	USA	NONE	522	18	Partial Response	Class IV	3.8	0.8	F
patient 35, first biopsy, glomeruli [X35AG_2]	GSM6030680	LN	Homo sapiens	ln class: Class IV	FeMale	22	proteinuria (g/24hr): 2.3	serum creatinine (mg/dl): 0.7	clinical response group: Partial Response	total RNA	Formalin-fixed and paraffin-embedded (FFPE) kidney biopsy tissue was cut into 6-7 10渭m sections. After deparaffinization, all available glomeruli and TI were separated by laser microdissection (PALM MicroBeam, Zeiss Labs, Germany), captured and digested with proteinase K. From each biopsy, a median glomerular cross-sectional area of 1,250,000ü渭m2, corresponding to 40 glomerular cross-sections, an…	not provided	To ensure there was similar starting material for each sample for expression analysis, pre-amplification conditions were determined by GAPDH RT-PCR cycle number. Extracted RNA was submitted for expression analysis using the Nanostring nCounter庐 GX human Immunology Panel (Nanostring Technologies, Seattle, WA). The panel consists of 579 immune response genes, 6 positive controls, 6 negative control…	9606	Reporter and Capture probes against 579 mRNAs were obtained from Nanostring Technologies Seattle, WA. Data were collected and analyzed using the nCounter Digital Analyzer.	The number of barcodes hybridized to specific RNA targets on cartridges were directly counted by the nCounter Digital Analyzer with 579 fields of view setting.	Nanostring RAW 10.xlsx	Glomerular RNA was extracted by laser microdissection and submitted for nanostring analysis	For nanostring data, raw counts were normalized to the positive spike-in controls and then log2 transformed. To reduce technical bias, genes with an expression level below the mean plus two standard deviations of the negative controls were filtered out. Quantile normalization was applied to the remaining transcripts (522 for glomeruli and 502 for TI). Linear mixed effect models were used to ident…	GPL21847	Samir,,Parikh	samir.parikh@osumc.edu	6142934997	Nephrology	Ohio State University	395 W 12th Avenu, -Address 2-	Columbus	OH	43210	USA	NONE	522	22	Partial Response	Class IV	2.3	0.7	F
patient 56, first biopsy, glomeruli [X56AG_10]	GSM6030681	LN	Homo sapiens	ln class: Class IV	FeMale	38	proteinuria (g/24hr): 3.4	serum creatinine (mg/dl): 0.8	clinical response group: Partial Response	total RNA	Formalin-fixed and paraffin-embedded (FFPE) kidney biopsy tissue was cut into 6-7 10渭m sections. After deparaffinization, all available glomeruli and TI were separated by laser microdissection (PALM MicroBeam, Zeiss Labs, Germany), captured and digested with proteinase K. From each biopsy, a median glomerular cross-sectional area of 1,250,000ü渭m2, corresponding to 40 glomerular cross-sections, an…	not provided	To ensure there was similar starting material for each sample for expression analysis, pre-amplification conditions were determined by GAPDH RT-PCR cycle number. Extracted RNA was submitted for expression analysis using the Nanostring nCounter庐 GX human Immunology Panel (Nanostring Technologies, Seattle, WA). The panel consists of 579 immune response genes, 6 positive controls, 6 negative control…	9606	Reporter and Capture probes against 579 mRNAs were obtained from Nanostring Technologies Seattle, WA. Data were collected and analyzed using the nCounter Digital Analyzer.	The number of barcodes hybridized to specific RNA targets on cartridges were directly counted by the nCounter Digital Analyzer with 579 fields of view setting.	Nanostring RAW 8.xlsx	Glomerular RNA was extracted by laser microdissection and submitted for nanostring analysis	For nanostring data, raw counts were normalized to the positive spike-in controls and then log2 transformed. To reduce technical bias, genes with an expression level below the mean plus two standard deviations of the negative controls were filtered out. Quantile normalization was applied to the remaining transcripts (522 for glomeruli and 502 for TI). Linear mixed effect models were used to ident…	GPL21847	Samir,,Parikh	samir.parikh@osumc.edu	6142934997	Nephrology	Ohio State University	395 W 12th Avenu, -Address 2-	Columbus	OH	43210	USA	NONE	522	38	Partial Response	Class IV	3.4	0.8	F
Patient 1, First Biopsy, Tubulointerstitium [X01AT_6]	GSM6030727	LN	Homo sapiens	ln class: Class IV	Male	37	proteinuria (g/24hr): 2	serum creatinine (mg/dl): 0.7	clinical response group: complete response	total RNA	Formalin-fixed and paraffin-embedded (FFPE) kidney biopsy tissue was cut into 6-7 10渭m sections. After deparaffinization, all available glomeruli and TI were separated by laser microdissection (PALM MicroBeam, Zeiss Labs, Germany), captured and digested with proteinase K. From each biopsy, a median glomerular cross-sectional area of 1,250,000ü渭m2, corresponding to 40 glomerular cross-sections, an…	not provided	To ensure there was similar starting material for each sample for expression analysis, pre-amplification conditions were determined by GAPDH RT-PCR cycle number. Extracted RNA was submitted for expression analysis using the Nanostring nCounter庐 GX human Immunology Panel (Nanostring Technologies, Seattle, WA). The panel consists of 579 immune response genes, 6 positive controls, 6 negative control…	9606	Reporter and Capture probes against 579 mRNAs were obtained from Nanostring Technologies Seattle, WA. Data were collected and analyzed using the nCounter Digital Analyzer.	The number of barcodes hybridized to specific RNA targets on cartridges were directly counted by the nCounter Digital Analyzer with 579 fields of view setting.	Nanostring RAW 2.xlsx, Nanostring RAW 16.xlsx	Tubulointerstitial RNA was extracted by laser microdissection and submitted for nanostring analysis	For nanostring data, raw counts were normalized to the positive spike-in controls and then log2 transformed. To reduce technical bias, genes with an expression level below the mean plus two standard deviations of the negative controls were filtered out. Quantile normalization was applied to the remaining transcripts (522 for glomeruli and 502 for TI). Linear mixed effect models were used to ident…	GPL21847	Samir,,Parikh	samir.parikh@osumc.edu	6142934997	Nephrology	Ohio State University	395 W 12th Avenu, -Address 2-	Columbus	OH	43210	USA	NONE	502	37	complete response	Class IV	2	0.7	M
Patient 2, First Biopsy, Tubulointerstitium [X02AT_4]	GSM6030728	LN	Homo sapiens	ln class: Class IV	FeMale	26	proteinuria (g/24hr): 4	serum creatinine (mg/dl): 0.5	clinical response group: complete response	total RNA	Formalin-fixed and paraffin-embedded (FFPE) kidney biopsy tissue was cut into 6-7 10渭m sections. After deparaffinization, all available glomeruli and TI were separated by laser microdissection (PALM MicroBeam, Zeiss Labs, Germany), captured and digested with proteinase K. From each biopsy, a median glomerular cross-sectional area of 1,250,000ü渭m2, corresponding to 40 glomerular cross-sections, an…	not provided	To ensure there was similar starting material for each sample for expression analysis, pre-amplification conditions were determined by GAPDH RT-PCR cycle number. Extracted RNA was submitted for expression analysis using the Nanostring nCounter庐 GX human Immunology Panel (Nanostring Technologies, Seattle, WA). The panel consists of 579 immune response genes, 6 positive controls, 6 negative control…	9606	Reporter and Capture probes against 579 mRNAs were obtained from Nanostring Technologies Seattle, WA. Data were collected and analyzed using the nCounter Digital Analyzer.	The number of barcodes hybridized to specific RNA targets on cartridges were directly counted by the nCounter Digital Analyzer with 579 fields of view setting.	Nanostring RAW 14.xlsx	Tubulointerstitial RNA was extracted by laser microdissection and submitted for nanostring analysis	For nanostring data, raw counts were normalized to the positive spike-in controls and then log2 transformed. To reduce technical bias, genes with an expression level below the mean plus two standard deviations of the negative controls were filtered out. Quantile normalization was applied to the remaining transcripts (522 for glomeruli and 502 for TI). Linear mixed effect models were used to ident…	GPL21847	Samir,,Parikh	samir.parikh@osumc.edu	6142934997	Nephrology	Ohio State University	395 W 12th Avenu, -Address 2-	Columbus	OH	43210	USA	NONE	502	26	complete response	Class IV	4	0.5	F
Patient 6, First Biopsy, Tubulointerstitium [X06AT_10]	GSM6030729	LN	Homo sapiens	ln class: Class IV	FeMale	28	proteinuria (g/24hr): 4	serum creatinine (mg/dl): 0.5	clinical response group: complete response	total RNA	Formalin-fixed and paraffin-embedded (FFPE) kidney biopsy tissue was cut into 6-7 10渭m sections. After deparaffinization, all available glomeruli and TI were separated by laser microdissection (PALM MicroBeam, Zeiss Labs, Germany), captured and digested with proteinase K. From each biopsy, a median glomerular cross-sectional area of 1,250,000ü渭m2, corresponding to 40 glomerular cross-sections, an…	not provided	To ensure there was similar starting material for each sample for expression analysis, pre-amplification conditions were determined by GAPDH RT-PCR cycle number. Extracted RNA was submitted for expression analysis using the Nanostring nCounter庐 GX human Immunology Panel (Nanostring Technologies, Seattle, WA). The panel consists of 579 immune response genes, 6 positive controls, 6 negative control…	9606	Reporter and Capture probes against 579 mRNAs were obtained from Nanostring Technologies Seattle, WA. Data were collected and analyzed using the nCounter Digital Analyzer.	The number of barcodes hybridized to specific RNA targets on cartridges were directly counted by the nCounter Digital Analyzer with 579 fields of view setting.	Nanostring RAW 20.xlsx	Tubulointerstitial RNA was extracted by laser microdissection and submitted for nanostring analysis	For nanostring data, raw counts were normalized to the positive spike-in controls and then log2 transformed. To reduce technical bias, genes with an expression level below the mean plus two standard deviations of the negative controls were filtered out. Quantile normalization was applied to the remaining transcripts (522 for glomeruli and 502 for TI). Linear mixed effect models were used to ident…	GPL21847	Samir,,Parikh	samir.parikh@osumc.edu	6142934997	Nephrology	Ohio State University	395 W 12th Avenu, -Address 2-	Columbus	OH	43210	USA	NONE	502	28	complete response	Class IV	4	0.5	F
Patient 11, First Biopsy, Tubulointerstitium [X11AT_2]	GSM6030730	LN	Homo sapiens	ln class: Class III	FeMale	29	proteinuria (g/24hr): 2	serum creatinine (mg/dl): 0.7	clinical response group: complete response	total RNA	Formalin-fixed and paraffin-embedded (FFPE) kidney biopsy tissue was cut into 6-7 10渭m sections. After deparaffinization, all available glomeruli and TI were separated by laser microdissection (PALM MicroBeam, Zeiss Labs, Germany), captured and digested with proteinase K. From each biopsy, a median glomerular cross-sectional area of 1,250,000ü渭m2, corresponding to 40 glomerular cross-sections, an…	not provided	To ensure there was similar starting material for each sample for expression analysis, pre-amplification conditions were determined by GAPDH RT-PCR cycle number. Extracted RNA was submitted for expression analysis using the Nanostring nCounter庐 GX human Immunology Panel (Nanostring Technologies, Seattle, WA). The panel consists of 579 immune response genes, 6 positive controls, 6 negative control…	9606	Reporter and Capture probes against 579 mRNAs were obtained from Nanostring Technologies Seattle, WA. Data were collected and analyzed using the nCounter Digital Analyzer.	The number of barcodes hybridized to specific RNA targets on cartridges were directly counted by the nCounter Digital Analyzer with 579 fields of view setting.	Nanostring RAW 12.xlsx	Tubulointerstitial RNA was extracted by laser microdissection and submitted for nanostring analysis	For nanostring data, raw counts were normalized to the positive spike-in controls and then log2 transformed. To reduce technical bias, genes with an expression level below the mean plus two standard deviations of the negative controls were filtered out. Quantile normalization was applied to the remaining transcripts (522 for glomeruli and 502 for TI). Linear mixed effect models were used to ident…	GPL21847	Samir,,Parikh	samir.parikh@osumc.edu	6142934997	Nephrology	Ohio State University	395 W 12th Avenu, -Address 2-	Columbus	OH	43210	USA	NONE	502	29	complete response	Class III	2	0.7	F
patient 12, First Biopsy, Tubulointerstitium [X12AT_11]	GSM6030731	LN	Homo sapiens	ln class: Mixed (III/IV+V)	FeMale	30	proteinuria (g/24hr): 5	serum creatinine (mg/dl): 1.2	clinical response group: complete response	total RNA	Formalin-fixed and paraffin-embedded (FFPE) kidney biopsy tissue was cut into 6-7 10渭m sections. After deparaffinization, all available glomeruli and TI were separated by laser microdissection (PALM MicroBeam, Zeiss Labs, Germany), captured and digested with proteinase K. From each biopsy, a median glomerular cross-sectional area of 1,250,000ü渭m2, corresponding to 40 glomerular cross-sections, an…	not provided	To ensure there was similar starting material for each sample for expression analysis, pre-amplification conditions were determined by GAPDH RT-PCR cycle number. Extracted RNA was submitted for expression analysis using the Nanostring nCounter庐 GX human Immunology Panel (Nanostring Technologies, Seattle, WA). The panel consists of 579 immune response genes, 6 positive controls, 6 negative control…	9606	Reporter and Capture probes against 579 mRNAs were obtained from Nanostring Technologies Seattle, WA. Data were collected and analyzed using the nCounter Digital Analyzer.	The number of barcodes hybridized to specific RNA targets on cartridges were directly counted by the nCounter Digital Analyzer with 579 fields of view setting.	Nanostring RAW 21.xslx	Tubulointerstitial RNA was extracted by laser microdissection and submitted for nanostring analysis	For nanostring data, raw counts were normalized to the positive spike-in controls and then log2 transformed. To reduce technical bias, genes with an expression level below the mean plus two standard deviations of the negative controls were filtered out. Quantile normalization was applied to the remaining transcripts (522 for glomeruli and 502 for TI). Linear mixed effect models were used to ident…	GPL21847	Samir,,Parikh	samir.parikh@osumc.edu	6142934997	Nephrology	Ohio State University	395 W 12th Avenu, -Address 2-	Columbus	OH	43210	USA	NONE	502	30	complete response	Mixed (III/IV+V)	5	1.2	F
patient 15, First Biopsy, Tubulointerstitium [Avg_15AT]	GSM6030732	LN	Homo sapiens	ln class: Mixed (III/IV+V)	Male	32	proteinuria (g/24hr): 2.4	serum creatinine (mg/dl): 0.8	clinical response group: complete response	total RNA	Formalin-fixed and paraffin-embedded (FFPE) kidney biopsy tissue was cut into 6-7 10渭m sections. After deparaffinization, all available glomeruli and TI were separated by laser microdissection (PALM MicroBeam, Zeiss Labs, Germany), captured and digested with proteinase K. From each biopsy, a median glomerular cross-sectional area of 1,250,000ü渭m2, corresponding to 40 glomerular cross-sections, an…	not provided	To ensure there was similar starting material for each sample for expression analysis, pre-amplification conditions were determined by GAPDH RT-PCR cycle number. Extracted RNA was submitted for expression analysis using the Nanostring nCounter庐 GX human Immunology Panel (Nanostring Technologies, Seattle, WA). The panel consists of 579 immune response genes, 6 positive controls, 6 negative control…	9606	Reporter and Capture probes against 579 mRNAs were obtained from Nanostring Technologies Seattle, WA. Data were collected and analyzed using the nCounter Digital Analyzer.	The number of barcodes hybridized to specific RNA targets on cartridges were directly counted by the nCounter Digital Analyzer with 579 fields of view setting.	Nanostring RAW 15.xlsx, Nanostring RAW 18.xlsx	Tubulointerstitial RNA was extracted by laser microdissection and submitted for nanostring analysis	For nanostring data, raw counts were normalized to the positive spike-in controls and then log2 transformed. To reduce technical bias, genes with an expression level below the mean plus two standard deviations of the negative controls were filtered out. Quantile normalization was applied to the remaining transcripts (522 for glomeruli and 502 for TI). Linear mixed effect models were used to ident…	GPL21847	Samir,,Parikh	samir.parikh@osumc.edu	6142934997	Nephrology	Ohio State University	395 W 12th Avenu, -Address 2-	Columbus	OH	43210	USA	NONE	502	32	complete response	Mixed (III/IV+V)	2.4	0.8	M
patient 20, First Biopsy, Tubulointerstitium [X20AT_3]	GSM6030733	LN	Homo sapiens	ln class: Class IV	FeMale	32	proteinuria (g/24hr): 1.2	serum creatinine (mg/dl): 0.7	clinical response group: complete response	total RNA	Formalin-fixed and paraffin-embedded (FFPE) kidney biopsy tissue was cut into 6-7 10渭m sections. After deparaffinization, all available glomeruli and TI were separated by laser microdissection (PALM MicroBeam, Zeiss Labs, Germany), captured and digested with proteinase K. From each biopsy, a median glomerular cross-sectional area of 1,250,000ü渭m2, corresponding to 40 glomerular cross-sections, an…	not provided	To ensure there was similar starting material for each sample for expression analysis, pre-amplification conditions were determined by GAPDH RT-PCR cycle number. Extracted RNA was submitted for expression analysis using the Nanostring nCounter庐 GX human Immunology Panel (Nanostring Technologies, Seattle, WA). The panel consists of 579 immune response genes, 6 positive controls, 6 negative control…	9606	Reporter and Capture probes against 579 mRNAs were obtained from Nanostring Technologies Seattle, WA. Data were collected and analyzed using the nCounter Digital Analyzer.	The number of barcodes hybridized to specific RNA targets on cartridges were directly counted by the nCounter Digital Analyzer with 579 fields of view setting.	Nanostring RAW 13.xlsx	Tubulointerstitial RNA was extracted by laser microdissection and submitted for nanostring analysis	For nanostring data, raw counts were normalized to the positive spike-in controls and then log2 transformed. To reduce technical bias, genes with an expression level below the mean plus two standard deviations of the negative controls were filtered out. Quantile normalization was applied to the remaining transcripts (522 for glomeruli and 502 for TI). Linear mixed effect models were used to ident…	GPL21847	Samir,,Parikh	samir.parikh@osumc.edu	6142934997	Nephrology	Ohio State University	395 W 12th Avenu, -Address 2-	Columbus	OH	43210	USA	NONE	502	32	complete response	Class IV	1.2	0.7	F
patient 23, First Biopsy, Tubulointerstitium [X23AT_6]	GSM6030734	LN	Homo sapiens	ln class: Mixed (III/IV+V)	FeMale	22	proteinuria (g/24hr): 6.12	serum creatinine (mg/dl): 0.8	clinical response group: complete response	total RNA	Formalin-fixed and paraffin-embedded (FFPE) kidney biopsy tissue was cut into 6-7 10渭m sections. After deparaffinization, all available glomeruli and TI were separated by laser microdissection (PALM MicroBeam, Zeiss Labs, Germany), captured and digested with proteinase K. From each biopsy, a median glomerular cross-sectional area of 1,250,000ü渭m2, corresponding to 40 glomerular cross-sections, an…	not provided	To ensure there was similar starting material for each sample for expression analysis, pre-amplification conditions were determined by GAPDH RT-PCR cycle number. Extracted RNA was submitted for expression analysis using the Nanostring nCounter庐 GX human Immunology Panel (Nanostring Technologies, Seattle, WA). The panel consists of 579 immune response genes, 6 positive controls, 6 negative control…	9606	Reporter and Capture probes against 579 mRNAs were obtained from Nanostring Technologies Seattle, WA. Data were collected and analyzed using the nCounter Digital Analyzer.	The number of barcodes hybridized to specific RNA targets on cartridges were directly counted by the nCounter Digital Analyzer with 579 fields of view setting.	Nanostring RAW 16.xlsx	Tubulointerstitial RNA was extracted by laser microdissection and submitted for nanostring analysis	For nanostring data, raw counts were normalized to the positive spike-in controls and then log2 transformed. To reduce technical bias, genes with an expression level below the mean plus two standard deviations of the negative controls were filtered out. Quantile normalization was applied to the remaining transcripts (522 for glomeruli and 502 for TI). Linear mixed effect models were used to ident…	GPL21847	Samir,,Parikh	samir.parikh@osumc.edu	6142934997	Nephrology	Ohio State University	395 W 12th Avenu, -Address 2-	Columbus	OH	43210	USA	NONE	502	22	complete response	Mixed (III/IV+V)	6.12	0.8	F
patient 25, First Biopsy, Tubulointerstitium [X25AT_9]	GSM6030735	LN	Homo sapiens	ln class: Class IV	FeMale	47	proteinuria (g/24hr): 6	serum creatinine (mg/dl): 0.8	clinical response group: complete response	total RNA	Formalin-fixed and paraffin-embedded (FFPE) kidney biopsy tissue was cut into 6-7 10渭m sections. After deparaffinization, all available glomeruli and TI were separated by laser microdissection (PALM MicroBeam, Zeiss Labs, Germany), captured and digested with proteinase K. From each biopsy, a median glomerular cross-sectional area of 1,250,000ü渭m2, corresponding to 40 glomerular cross-sections, an…	not provided	To ensure there was similar starting material for each sample for expression analysis, pre-amplification conditions were determined by GAPDH RT-PCR cycle number. Extracted RNA was submitted for expression analysis using the Nanostring nCounter庐 GX human Immunology Panel (Nanostring Technologies, Seattle, WA). The panel consists of 579 immune response genes, 6 positive controls, 6 negative control…	9606	Reporter and Capture probes against 579 mRNAs were obtained from Nanostring Technologies Seattle, WA. Data were collected and analyzed using the nCounter Digital Analyzer.	The number of barcodes hybridized to specific RNA targets on cartridges were directly counted by the nCounter Digital Analyzer with 579 fields of view setting.	Nanostring RAW 19.xlsx	Tubulointerstitial RNA was extracted by laser microdissection and submitted for nanostring analysis	For nanostring data, raw counts were normalized to the positive spike-in controls and then log2 transformed. To reduce technical bias, genes with an expression level below the mean plus two standard deviations of the negative controls were filtered out. Quantile normalization was applied to the remaining transcripts (522 for glomeruli and 502 for TI). Linear mixed effect models were used to ident…	GPL21847	Samir,,Parikh	samir.parikh@osumc.edu	6142934997	Nephrology	Ohio State University	395 W 12th Avenu, -Address 2-	Columbus	OH	43210	USA	NONE	502	47	complete response	Class IV	6	0.8	F
patient 26, First Biopsy, Tubulointerstitium [X26AT_2]	GSM6030736	LN	Homo sapiens	ln class: Class III	FeMale	27	proteinuria (g/24hr): 1.3	serum creatinine (mg/dl): 0.8	clinical response group: complete response	total RNA	Formalin-fixed and paraffin-embedded (FFPE) kidney biopsy tissue was cut into 6-7 10渭m sections. After deparaffinization, all available glomeruli and TI were separated by laser microdissection (PALM MicroBeam, Zeiss Labs, Germany), captured and digested with proteinase K. From each biopsy, a median glomerular cross-sectional area of 1,250,000ü渭m2, corresponding to 40 glomerular cross-sections, an…	not provided	To ensure there was similar starting material for each sample for expression analysis, pre-amplification conditions were determined by GAPDH RT-PCR cycle number. Extracted RNA was submitted for expression analysis using the Nanostring nCounter庐 GX human Immunology Panel (Nanostring Technologies, Seattle, WA). The panel consists of 579 immune response genes, 6 positive controls, 6 negative control…	9606	Reporter and Capture probes against 579 mRNAs were obtained from Nanostring Technologies Seattle, WA. Data were collected and analyzed using the nCounter Digital Analyzer.	The number of barcodes hybridized to specific RNA targets on cartridges were directly counted by the nCounter Digital Analyzer with 579 fields of view setting.	Nanostring RAW 12.xlsx	Tubulointerstitial RNA was extracted by laser microdissection and submitted for nanostring analysis	For nanostring data, raw counts were normalized to the positive spike-in controls and then log2 transformed. To reduce technical bias, genes with an expression level below the mean plus two standard deviations of the negative controls were filtered out. Quantile normalization was applied to the remaining transcripts (522 for glomeruli and 502 for TI). Linear mixed effect models were used to ident…	GPL21847	Samir,,Parikh	samir.parikh@osumc.edu	6142934997	Nephrology	Ohio State University	395 W 12th Avenu, -Address 2-	Columbus	OH	43210	USA	NONE	502	27	complete response	Class III	1.3	0.8	F
patient 30, First Biopsy, Tubulointerstitium [X30AT_6]	GSM6030737	LN	Homo sapiens	ln class: Class IV	FeMale	50	proteinuria (g/24hr): 1	serum creatinine (mg/dl): 0.9	clinical response group: complete response	total RNA	Formalin-fixed and paraffin-embedded (FFPE) kidney biopsy tissue was cut into 6-7 10渭m sections. After deparaffinization, all available glomeruli and TI were separated by laser microdissection (PALM MicroBeam, Zeiss Labs, Germany), captured and digested with proteinase K. From each biopsy, a median glomerular cross-sectional area of 1,250,000ü渭m2, corresponding to 40 glomerular cross-sections, an…	not provided	To ensure there was similar starting material for each sample for expression analysis, pre-amplification conditions were determined by GAPDH RT-PCR cycle number. Extracted RNA was submitted for expression analysis using the Nanostring nCounter庐 GX human Immunology Panel (Nanostring Technologies, Seattle, WA). The panel consists of 579 immune response genes, 6 positive controls, 6 negative control…	9606	Reporter and Capture probes against 579 mRNAs were obtained from Nanostring Technologies Seattle, WA. Data were collected and analyzed using the nCounter Digital Analyzer.	The number of barcodes hybridized to specific RNA targets on cartridges were directly counted by the nCounter Digital Analyzer with 579 fields of view setting.	Nanostring RAW 16.xlsx	Tubulointerstitial RNA was extracted by laser microdissection and submitted for nanostring analysis	For nanostring data, raw counts were normalized to the positive spike-in controls and then log2 transformed. To reduce technical bias, genes with an expression level below the mean plus two standard deviations of the negative controls were filtered out. Quantile normalization was applied to the remaining transcripts (522 for glomeruli and 502 for TI). Linear mixed effect models were used to ident…	GPL21847	Samir,,Parikh	samir.parikh@osumc.edu	6142934997	Nephrology	Ohio State University	395 W 12th Avenu, -Address 2-	Columbus	OH	43210	USA	NONE	502	50	complete response	Class IV	1	0.9	F
patient 32, First Biopsy, Tubulointerstitium [X32AT_1]	GSM6030738	LN	Homo sapiens	ln class: Mixed (III/IV+V)	FeMale	22	proteinuria (g/24hr): 2.8	serum creatinine (mg/dl): 0.7	clinical response group: complete response	total RNA	Formalin-fixed and paraffin-embedded (FFPE) kidney biopsy tissue was cut into 6-7 10渭m sections. After deparaffinization, all available glomeruli and TI were separated by laser microdissection (PALM MicroBeam, Zeiss Labs, Germany), captured and digested with proteinase K. From each biopsy, a median glomerular cross-sectional area of 1,250,000ü渭m2, corresponding to 40 glomerular cross-sections, an…	not provided	To ensure there was similar starting material for each sample for expression analysis, pre-amplification conditions were determined by GAPDH RT-PCR cycle number. Extracted RNA was submitted for expression analysis using the Nanostring nCounter庐 GX human Immunology Panel (Nanostring Technologies, Seattle, WA). The panel consists of 579 immune response genes, 6 positive controls, 6 negative control…	9606	Reporter and Capture probes against 579 mRNAs were obtained from Nanostring Technologies Seattle, WA. Data were collected and analyzed using the nCounter Digital Analyzer.	The number of barcodes hybridized to specific RNA targets on cartridges were directly counted by the nCounter Digital Analyzer with 579 fields of view setting.	Nanostring RAW 11.xlsx	Tubulointerstitial RNA was extracted by laser microdissection and submitted for nanostring analysis	For nanostring data, raw counts were normalized to the positive spike-in controls and then log2 transformed. To reduce technical bias, genes with an expression level below the mean plus two standard deviations of the negative controls were filtered out. Quantile normalization was applied to the remaining transcripts (522 for glomeruli and 502 for TI). Linear mixed effect models were used to ident…	GPL21847	Samir,,Parikh	samir.parikh@osumc.edu	6142934997	Nephrology	Ohio State University	395 W 12th Avenu, -Address 2-	Columbus	OH	43210	USA	NONE	502	22	complete response	Mixed (III/IV+V)	2.8	0.7	F
patient 34, First Biopsy, Tubulointerstitium [X34AT_3]	GSM6030739	LN	Homo sapiens	ln class: Class IV	FeMale	25	proteinuria (g/24hr): 1	serum creatinine (mg/dl): 0.8	clinical response group: complete response	total RNA	Formalin-fixed and paraffin-embedded (FFPE) kidney biopsy tissue was cut into 6-7 10渭m sections. After deparaffinization, all available glomeruli and TI were separated by laser microdissection (PALM MicroBeam, Zeiss Labs, Germany), captured and digested with proteinase K. From each biopsy, a median glomerular cross-sectional area of 1,250,000ü渭m2, corresponding to 40 glomerular cross-sections, an…	not provided	To ensure there was similar starting material for each sample for expression analysis, pre-amplification conditions were determined by GAPDH RT-PCR cycle number. Extracted RNA was submitted for expression analysis using the Nanostring nCounter庐 GX human Immunology Panel (Nanostring Technologies, Seattle, WA). The panel consists of 579 immune response genes, 6 positive controls, 6 negative control…	9606	Reporter and Capture probes against 579 mRNAs were obtained from Nanostring Technologies Seattle, WA. Data were collected and analyzed using the nCounter Digital Analyzer.	The number of barcodes hybridized to specific RNA targets on cartridges were directly counted by the nCounter Digital Analyzer with 579 fields of view setting.	Nanostring RAW 13.xlsx	Tubulointerstitial RNA was extracted by laser microdissection and submitted for nanostring analysis	For nanostring data, raw counts were normalized to the positive spike-in controls and then log2 transformed. To reduce technical bias, genes with an expression level below the mean plus two standard deviations of the negative controls were filtered out. Quantile normalization was applied to the remaining transcripts (522 for glomeruli and 502 for TI). Linear mixed effect models were used to ident…	GPL21847	Samir,,Parikh	samir.parikh@osumc.edu	6142934997	Nephrology	Ohio State University	395 W 12th Avenu, -Address 2-	Columbus	OH	43210	USA	NONE	502	25	complete response	Class IV	1	0.8	F
patient 37, First Biopsy, Tubulointerstitium [X37AT_10]	GSM6030740	LN	Homo sapiens	ln class: Class IV	FeMale	25	proteinuria (g/24hr): 1.2	serum creatinine (mg/dl): 0.5	clinical response group: complete response	total RNA	Formalin-fixed and paraffin-embedded (FFPE) kidney biopsy tissue was cut into 6-7 10渭m sections. After deparaffinization, all available glomeruli and TI were separated by laser microdissection (PALM MicroBeam, Zeiss Labs, Germany), captured and digested with proteinase K. From each biopsy, a median glomerular cross-sectional area of 1,250,000ü渭m2, corresponding to 40 glomerular cross-sections, an…	not provided	To ensure there was similar starting material for each sample for expression analysis, pre-amplification conditions were determined by GAPDH RT-PCR cycle number. Extracted RNA was submitted for expression analysis using the Nanostring nCounter庐 GX human Immunology Panel (Nanostring Technologies, Seattle, WA). The panel consists of 579 immune response genes, 6 positive controls, 6 negative control…	9606	Reporter and Capture probes against 579 mRNAs were obtained from Nanostring Technologies Seattle, WA. Data were collected and analyzed using the nCounter Digital Analyzer.	The number of barcodes hybridized to specific RNA targets on cartridges were directly counted by the nCounter Digital Analyzer with 579 fields of view setting.	Nanostring RAW 20.xlsx	Tubulointerstitial RNA was extracted by laser microdissection and submitted for nanostring analysis	For nanostring data, raw counts were normalized to the positive spike-in controls and then log2 transformed. To reduce technical bias, genes with an expression level below the mean plus two standard deviations of the negative controls were filtered out. Quantile normalization was applied to the remaining transcripts (522 for glomeruli and 502 for TI). Linear mixed effect models were used to ident…	GPL21847	Samir,,Parikh	samir.parikh@osumc.edu	6142934997	Nephrology	Ohio State University	395 W 12th Avenu, -Address 2-	Columbus	OH	43210	USA	NONE	502	25	complete response	Class IV	1.2	0.5	F
patient 39, First Biopsy, Tubulointerstitium [X39AT_7]	GSM6030741	LN	Homo sapiens	ln class: Class IV	FeMale	42	proteinuria (g/24hr): 2.2	serum creatinine (mg/dl): 0.4	clinical response group: complete response	total RNA	Formalin-fixed and paraffin-embedded (FFPE) kidney biopsy tissue was cut into 6-7 10渭m sections. After deparaffinization, all available glomeruli and TI were separated by laser microdissection (PALM MicroBeam, Zeiss Labs, Germany), captured and digested with proteinase K. From each biopsy, a median glomerular cross-sectional area of 1,250,000ü渭m2, corresponding to 40 glomerular cross-sections, an…	not provided	To ensure there was similar starting material for each sample for expression analysis, pre-amplification conditions were determined by GAPDH RT-PCR cycle number. Extracted RNA was submitted for expression analysis using the Nanostring nCounter庐 GX human Immunology Panel (Nanostring Technologies, Seattle, WA). The panel consists of 579 immune response genes, 6 positive controls, 6 negative control…	9606	Reporter and Capture probes against 579 mRNAs were obtained from Nanostring Technologies Seattle, WA. Data were collected and analyzed using the nCounter Digital Analyzer.	The number of barcodes hybridized to specific RNA targets on cartridges were directly counted by the nCounter Digital Analyzer with 579 fields of view setting.	Nanostring RAW 17.xlsx	Tubulointerstitial RNA was extracted by laser microdissection and submitted for nanostring analysis	For nanostring data, raw counts were normalized to the positive spike-in controls and then log2 transformed. To reduce technical bias, genes with an expression level below the mean plus two standard deviations of the negative controls were filtered out. Quantile normalization was applied to the remaining transcripts (522 for glomeruli and 502 for TI). Linear mixed effect models were used to ident…	GPL21847	Samir,,Parikh	samir.parikh@osumc.edu	6142934997	Nephrology	Ohio State University	395 W 12th Avenu, -Address 2-	Columbus	OH	43210	USA	NONE	502	42	complete response	Class IV	2.2	0.4	F
patient 44, First Biopsy, Tubulointerstitium [X44AT_10]	GSM6030742	LN	Homo sapiens	ln class: Class IV	FeMale	25	proteinuria (g/24hr): 3.6	serum creatinine (mg/dl): 1.4	clinical response group: complete response	total RNA	Formalin-fixed and paraffin-embedded (FFPE) kidney biopsy tissue was cut into 6-7 10渭m sections. After deparaffinization, all available glomeruli and TI were separated by laser microdissection (PALM MicroBeam, Zeiss Labs, Germany), captured and digested with proteinase K. From each biopsy, a median glomerular cross-sectional area of 1,250,000ü渭m2, corresponding to 40 glomerular cross-sections, an…	not provided	To ensure there was similar starting material for each sample for expression analysis, pre-amplification conditions were determined by GAPDH RT-PCR cycle number. Extracted RNA was submitted for expression analysis using the Nanostring nCounter庐 GX human Immunology Panel (Nanostring Technologies, Seattle, WA). The panel consists of 579 immune response genes, 6 positive controls, 6 negative control…	9606	Reporter and Capture probes against 579 mRNAs were obtained from Nanostring Technologies Seattle, WA. Data were collected and analyzed using the nCounter Digital Analyzer.	The number of barcodes hybridized to specific RNA targets on cartridges were directly counted by the nCounter Digital Analyzer with 579 fields of view setting.	Nanostring RAW 20.xlsx	Tubulointerstitial RNA was extracted by laser microdissection and submitted for nanostring analysis	For nanostring data, raw counts were normalized to the positive spike-in controls and then log2 transformed. To reduce technical bias, genes with an expression level below the mean plus two standard deviations of the negative controls were filtered out. Quantile normalization was applied to the remaining transcripts (522 for glomeruli and 502 for TI). Linear mixed effect models were used to ident…	GPL21847	Samir,,Parikh	samir.parikh@osumc.edu	6142934997	Nephrology	Ohio State University	395 W 12th Avenu, -Address 2-	Columbus	OH	43210	USA	NONE	502	25	complete response	Class IV	3.6	1.4	F
patient 47, First Biopsy, Tubulointerstitium [X47AT_10]	GSM6030743	LN	Homo sapiens	ln class: Class III	FeMale	45	proteinuria (g/24hr): 2.0	serum creatinine (mg/dl): 0.7	clinical response group: complete response	total RNA	Formalin-fixed and paraffin-embedded (FFPE) kidney biopsy tissue was cut into 6-7 10渭m sections. After deparaffinization, all available glomeruli and TI were separated by laser microdissection (PALM MicroBeam, Zeiss Labs, Germany), captured and digested with proteinase K. From each biopsy, a median glomerular cross-sectional area of 1,250,000ü渭m2, corresponding to 40 glomerular cross-sections, an…	not provided	To ensure there was similar starting material for each sample for expression analysis, pre-amplification conditions were determined by GAPDH RT-PCR cycle number. Extracted RNA was submitted for expression analysis using the Nanostring nCounter庐 GX human Immunology Panel (Nanostring Technologies, Seattle, WA). The panel consists of 579 immune response genes, 6 positive controls, 6 negative control…	9606	Reporter and Capture probes against 579 mRNAs were obtained from Nanostring Technologies Seattle, WA. Data were collected and analyzed using the nCounter Digital Analyzer.	The number of barcodes hybridized to specific RNA targets on cartridges were directly counted by the nCounter Digital Analyzer with 579 fields of view setting.	Nanostring RAW 20.xlsx	Tubulointerstitial RNA was extracted by laser microdissection and submitted for nanostring analysis	For nanostring data, raw counts were normalized to the positive spike-in controls and then log2 transformed. To reduce technical bias, genes with an expression level below the mean plus two standard deviations of the negative controls were filtered out. Quantile normalization was applied to the remaining transcripts (522 for glomeruli and 502 for TI). Linear mixed effect models were used to ident…	GPL21847	Samir,,Parikh	samir.parikh@osumc.edu	6142934997	Nephrology	Ohio State University	395 W 12th Avenu, -Address 2-	Columbus	OH	43210	USA	NONE	502	45	complete response	Class III	2	0.7	F
patient 48, First Biopsy, Tubulointerstitium [Avg_48AT]	GSM6030744	LN	Homo sapiens	ln class: Class III	Male	32	proteinuria (g/24hr): 1.0	serum creatinine (mg/dl): 0.7	clinical response group: complete response	total RNA	Formalin-fixed and paraffin-embedded (FFPE) kidney biopsy tissue was cut into 6-7 10渭m sections. After deparaffinization, all available glomeruli and TI were separated by laser microdissection (PALM MicroBeam, Zeiss Labs, Germany), captured and digested with proteinase K. From each biopsy, a median glomerular cross-sectional area of 1,250,000ü渭m2, corresponding to 40 glomerular cross-sections, an…	not provided	To ensure there was similar starting material for each sample for expression analysis, pre-amplification conditions were determined by GAPDH RT-PCR cycle number. Extracted RNA was submitted for expression analysis using the Nanostring nCounter庐 GX human Immunology Panel (Nanostring Technologies, Seattle, WA). The panel consists of 579 immune response genes, 6 positive controls, 6 negative control…	9606	Reporter and Capture probes against 579 mRNAs were obtained from Nanostring Technologies Seattle, WA. Data were collected and analyzed using the nCounter Digital Analyzer.	The number of barcodes hybridized to specific RNA targets on cartridges were directly counted by the nCounter Digital Analyzer with 579 fields of view setting.	Nanostring RAW 11.xlsx, Nanostring RAW 17.xlsx	Tubulointerstitial RNA was extracted by laser microdissection and submitted for nanostring analysis	For nanostring data, raw counts were normalized to the positive spike-in controls and then log2 transformed. To reduce technical bias, genes with an expression level below the mean plus two standard deviations of the negative controls were filtered out. Quantile normalization was applied to the remaining transcripts (522 for glomeruli and 502 for TI). Linear mixed effect models were used to ident…	GPL21847	Samir,,Parikh	samir.parikh@osumc.edu	6142934997	Nephrology	Ohio State University	395 W 12th Avenu, -Address 2-	Columbus	OH	43210	USA	NONE	502	32	complete response	Class III	1	0.7	M
patient 49, First Biopsy, Tubulointerstitium [X49AT_11]	GSM6030745	LN	Homo sapiens	ln class: Class IV	FeMale	22	proteinuria (g/24hr): 1.5	serum creatinine (mg/dl): 0.7	clinical response group: complete response	total RNA	Formalin-fixed and paraffin-embedded (FFPE) kidney biopsy tissue was cut into 6-7 10渭m sections. After deparaffinization, all available glomeruli and TI were separated by laser microdissection (PALM MicroBeam, Zeiss Labs, Germany), captured and digested with proteinase K. From each biopsy, a median glomerular cross-sectional area of 1,250,000ü渭m2, corresponding to 40 glomerular cross-sections, an…	not provided	To ensure there was similar starting material for each sample for expression analysis, pre-amplification conditions were determined by GAPDH RT-PCR cycle number. Extracted RNA was submitted for expression analysis using the Nanostring nCounter庐 GX human Immunology Panel (Nanostring Technologies, Seattle, WA). The panel consists of 579 immune response genes, 6 positive controls, 6 negative control…	9606	Reporter and Capture probes against 579 mRNAs were obtained from Nanostring Technologies Seattle, WA. Data were collected and analyzed using the nCounter Digital Analyzer.	The number of barcodes hybridized to specific RNA targets on cartridges were directly counted by the nCounter Digital Analyzer with 579 fields of view setting.	Nanostring RAW 21.xslx	Tubulointerstitial RNA was extracted by laser microdissection and submitted for nanostring analysis	For nanostring data, raw counts were normalized to the positive spike-in controls and then log2 transformed. To reduce technical bias, genes with an expression level below the mean plus two standard deviations of the negative controls were filtered out. Quantile normalization was applied to the remaining transcripts (522 for glomeruli and 502 for TI). Linear mixed effect models were used to ident…	GPL21847	Samir,,Parikh	samir.parikh@osumc.edu	6142934997	Nephrology	Ohio State University	395 W 12th Avenu, -Address 2-	Columbus	OH	43210	USA	NONE	502	22	complete response	Class IV	1.5	0.7	F
patient 50, First Biopsy, Tubulointerstitium [X50AT_9]	GSM6030746	LN	Homo sapiens	ln class: Class IV	FeMale	18	proteinuria (g/24hr): 2.6	serum creatinine (mg/dl): 0.8	clinical response group: complete response	total RNA	Formalin-fixed and paraffin-embedded (FFPE) kidney biopsy tissue was cut into 6-7 10渭m sections. After deparaffinization, all available glomeruli and TI were separated by laser microdissection (PALM MicroBeam, Zeiss Labs, Germany), captured and digested with proteinase K. From each biopsy, a median glomerular cross-sectional area of 1,250,000ü渭m2, corresponding to 40 glomerular cross-sections, an…	not provided	To ensure there was similar starting material for each sample for expression analysis, pre-amplification conditions were determined by GAPDH RT-PCR cycle number. Extracted RNA was submitted for expression analysis using the Nanostring nCounter庐 GX human Immunology Panel (Nanostring Technologies, Seattle, WA). The panel consists of 579 immune response genes, 6 positive controls, 6 negative control…	9606	Reporter and Capture probes against 579 mRNAs were obtained from Nanostring Technologies Seattle, WA. Data were collected and analyzed using the nCounter Digital Analyzer.	The number of barcodes hybridized to specific RNA targets on cartridges were directly counted by the nCounter Digital Analyzer with 579 fields of view setting.	Nanostring RAW 19.xlsx	Tubulointerstitial RNA was extracted by laser microdissection and submitted for nanostring analysis	For nanostring data, raw counts were normalized to the positive spike-in controls and then log2 transformed. To reduce technical bias, genes with an expression level below the mean plus two standard deviations of the negative controls were filtered out. Quantile normalization was applied to the remaining transcripts (522 for glomeruli and 502 for TI). Linear mixed effect models were used to ident…	GPL21847	Samir,,Parikh	samir.parikh@osumc.edu	6142934997	Nephrology	Ohio State University	395 W 12th Avenu, -Address 2-	Columbus	OH	43210	USA	NONE	502	18	complete response	Class IV	2.6	0.8	F
patient 51, First Biopsy, Tubulointerstitium [X51AT_4]	GSM6030747	LN	Homo sapiens	ln class: Class IV	FeMale	26	proteinuria (g/24hr): 1.3	serum creatinine (mg/dl): 0.8	clinical response group: complete response	total RNA	Formalin-fixed and paraffin-embedded (FFPE) kidney biopsy tissue was cut into 6-7 10渭m sections. After deparaffinization, all available glomeruli and TI were separated by laser microdissection (PALM MicroBeam, Zeiss Labs, Germany), captured and digested with proteinase K. From each biopsy, a median glomerular cross-sectional area of 1,250,000ü渭m2, corresponding to 40 glomerular cross-sections, an…	not provided	To ensure there was similar starting material for each sample for expression analysis, pre-amplification conditions were determined by GAPDH RT-PCR cycle number. Extracted RNA was submitted for expression analysis using the Nanostring nCounter庐 GX human Immunology Panel (Nanostring Technologies, Seattle, WA). The panel consists of 579 immune response genes, 6 positive controls, 6 negative control…	9606	Reporter and Capture probes against 579 mRNAs were obtained from Nanostring Technologies Seattle, WA. Data were collected and analyzed using the nCounter Digital Analyzer.	The number of barcodes hybridized to specific RNA targets on cartridges were directly counted by the nCounter Digital Analyzer with 579 fields of view setting.	Nanostring RAW 14.xlsx	Tubulointerstitial RNA was extracted by laser microdissection and submitted for nanostring analysis	For nanostring data, raw counts were normalized to the positive spike-in controls and then log2 transformed. To reduce technical bias, genes with an expression level below the mean plus two standard deviations of the negative controls were filtered out. Quantile normalization was applied to the remaining transcripts (522 for glomeruli and 502 for TI). Linear mixed effect models were used to ident…	GPL21847	Samir,,Parikh	samir.parikh@osumc.edu	6142934997	Nephrology	Ohio State University	395 W 12th Avenu, -Address 2-	Columbus	OH	43210	USA	NONE	502	26	complete response	Class IV	1.3	0.8	F
patient 53, First Biopsy, Tubulointerstitium [X53AT_11]	GSM6030748	LN	Homo sapiens	ln class: Class IV	FeMale	39	proteinuria (g/24hr): 2.7	serum creatinine (mg/dl): 0.9	clinical response group: complete response	total RNA	Formalin-fixed and paraffin-embedded (FFPE) kidney biopsy tissue was cut into 6-7 10渭m sections. After deparaffinization, all available glomeruli and TI were separated by laser microdissection (PALM MicroBeam, Zeiss Labs, Germany), captured and digested with proteinase K. From each biopsy, a median glomerular cross-sectional area of 1,250,000ü渭m2, corresponding to 40 glomerular cross-sections, an…	not provided	To ensure there was similar starting material for each sample for expression analysis, pre-amplification conditions were determined by GAPDH RT-PCR cycle number. Extracted RNA was submitted for expression analysis using the Nanostring nCounter庐 GX human Immunology Panel (Nanostring Technologies, Seattle, WA). The panel consists of 579 immune response genes, 6 positive controls, 6 negative control…	9606	Reporter and Capture probes against 579 mRNAs were obtained from Nanostring Technologies Seattle, WA. Data were collected and analyzed using the nCounter Digital Analyzer.	The number of barcodes hybridized to specific RNA targets on cartridges were directly counted by the nCounter Digital Analyzer with 579 fields of view setting.	Nanostring RAW 21.xlsx	Tubulointerstitial RNA was extracted by laser microdissection and submitted for nanostring analysis	For nanostring data, raw counts were normalized to the positive spike-in controls and then log2 transformed. To reduce technical bias, genes with an expression level below the mean plus two standard deviations of the negative controls were filtered out. Quantile normalization was applied to the remaining transcripts (522 for glomeruli and 502 for TI). Linear mixed effect models were used to ident…	GPL21847	Samir,,Parikh	samir.parikh@osumc.edu	6142934997	Nephrology	Ohio State University	395 W 12th Avenu, -Address 2-	Columbus	OH	43210	USA	NONE	502	39	complete response	Class IV	2.7	0.9	F
patient 55, First Biopsy, Tubulointerstitium [X55AT_8]	GSM6030749	LN	Homo sapiens	ln class: Class III	FeMale	26	proteinuria (g/24hr): 2.0	serum creatinine (mg/dl): 0.9	clinical response group: complete response	total RNA	Formalin-fixed and paraffin-embedded (FFPE) kidney biopsy tissue was cut into 6-7 10渭m sections. After deparaffinization, all available glomeruli and TI were separated by laser microdissection (PALM MicroBeam, Zeiss Labs, Germany), captured and digested with proteinase K. From each biopsy, a median glomerular cross-sectional area of 1,250,000ü渭m2, corresponding to 40 glomerular cross-sections, an…	not provided	To ensure there was similar starting material for each sample for expression analysis, pre-amplification conditions were determined by GAPDH RT-PCR cycle number. Extracted RNA was submitted for expression analysis using the Nanostring nCounter庐 GX human Immunology Panel (Nanostring Technologies, Seattle, WA). The panel consists of 579 immune response genes, 6 positive controls, 6 negative control…	9606	Reporter and Capture probes against 579 mRNAs were obtained from Nanostring Technologies Seattle, WA. Data were collected and analyzed using the nCounter Digital Analyzer.	The number of barcodes hybridized to specific RNA targets on cartridges were directly counted by the nCounter Digital Analyzer with 579 fields of view setting.	Nanostring RAW 18.xlsx	Tubulointerstitial RNA was extracted by laser microdissection and submitted for nanostring analysis	For nanostring data, raw counts were normalized to the positive spike-in controls and then log2 transformed. To reduce technical bias, genes with an expression level below the mean plus two standard deviations of the negative controls were filtered out. Quantile normalization was applied to the remaining transcripts (522 for glomeruli and 502 for TI). Linear mixed effect models were used to ident…	GPL21847	Samir,,Parikh	samir.parikh@osumc.edu	6142934997	Nephrology	Ohio State University	395 W 12th Avenu, -Address 2-	Columbus	OH	43210	USA	NONE	502	26	complete response	Class III	2	0.9	F
patient 5, First Biopsy, Tubulointerstitium [X05AT_5]	GSM6030750	LN	Homo sapiens	ln class: Class IV	Male	52	proteinuria (g/24hr): 2	serum creatinine (mg/dl): 1.5	clinical response group: No Response	total RNA	Formalin-fixed and paraffin-embedded (FFPE) kidney biopsy tissue was cut into 6-7 10渭m sections. After deparaffinization, all available glomeruli and TI were separated by laser microdissection (PALM MicroBeam, Zeiss Labs, Germany), captured and digested with proteinase K. From each biopsy, a median glomerular cross-sectional area of 1,250,000ü渭m2, corresponding to 40 glomerular cross-sections, an…	not provided	To ensure there was similar starting material for each sample for expression analysis, pre-amplification conditions were determined by GAPDH RT-PCR cycle number. Extracted RNA was submitted for expression analysis using the Nanostring nCounter庐 GX human Immunology Panel (Nanostring Technologies, Seattle, WA). The panel consists of 579 immune response genes, 6 positive controls, 6 negative control…	9606	Reporter and Capture probes against 579 mRNAs were obtained from Nanostring Technologies Seattle, WA. Data were collected and analyzed using the nCounter Digital Analyzer.	The number of barcodes hybridized to specific RNA targets on cartridges were directly counted by the nCounter Digital Analyzer with 579 fields of view setting.	Nanostring RAW 15.xlsx	Tubulointerstitial RNA was extracted by laser microdissection and submitted for nanostring analysis	For nanostring data, raw counts were normalized to the positive spike-in controls and then log2 transformed. To reduce technical bias, genes with an expression level below the mean plus two standard deviations of the negative controls were filtered out. Quantile normalization was applied to the remaining transcripts (522 for glomeruli and 502 for TI). Linear mixed effect models were used to ident…	GPL21847	Samir,,Parikh	samir.parikh@osumc.edu	6142934997	Nephrology	Ohio State University	395 W 12th Avenu, -Address 2-	Columbus	OH	43210	USA	NONE	502	52	No Response	Class IV	2	1.5	M
patient 9, First Biopsy, Tubulointerstitium [X09AT_4]	GSM6030751	LN	Homo sapiens	ln class: Class IV	FeMale	20	proteinuria (g/24hr): 10	serum creatinine (mg/dl): 3.5	clinical response group: No Response	total RNA	Formalin-fixed and paraffin-embedded (FFPE) kidney biopsy tissue was cut into 6-7 10渭m sections. After deparaffinization, all available glomeruli and TI were separated by laser microdissection (PALM MicroBeam, Zeiss Labs, Germany), captured and digested with proteinase K. From each biopsy, a median glomerular cross-sectional area of 1,250,000ü渭m2, corresponding to 40 glomerular cross-sections, an…	not provided	To ensure there was similar starting material for each sample for expression analysis, pre-amplification conditions were determined by GAPDH RT-PCR cycle number. Extracted RNA was submitted for expression analysis using the Nanostring nCounter庐 GX human Immunology Panel (Nanostring Technologies, Seattle, WA). The panel consists of 579 immune response genes, 6 positive controls, 6 negative control…	9606	Reporter and Capture probes against 579 mRNAs were obtained from Nanostring Technologies Seattle, WA. Data were collected and analyzed using the nCounter Digital Analyzer.	The number of barcodes hybridized to specific RNA targets on cartridges were directly counted by the nCounter Digital Analyzer with 579 fields of view setting.	Nansotring RAW 14.xlsx	Tubulointerstitial RNA was extracted by laser microdissection and submitted for nanostring analysis	For nanostring data, raw counts were normalized to the positive spike-in controls and then log2 transformed. To reduce technical bias, genes with an expression level below the mean plus two standard deviations of the negative controls were filtered out. Quantile normalization was applied to the remaining transcripts (522 for glomeruli and 502 for TI). Linear mixed effect models were used to ident…	GPL21847	Samir,,Parikh	samir.parikh@osumc.edu	6142934997	Nephrology	Ohio State University	395 W 12th Avenu, -Address 2-	Columbus	OH	43210	USA	NONE	502	20	No Response	Class IV	10	3.5	F
patient 10, First Biopsy, Tubulointerstitium [X10AT_2]	GSM6030752	LN	Homo sapiens	ln class: Mixed (III/IV+V)	Male	23	proteinuria (g/24hr): 2	serum creatinine (mg/dl): 0.8	clinical response group: No Response	total RNA	Formalin-fixed and paraffin-embedded (FFPE) kidney biopsy tissue was cut into 6-7 10渭m sections. After deparaffinization, all available glomeruli and TI were separated by laser microdissection (PALM MicroBeam, Zeiss Labs, Germany), captured and digested with proteinase K. From each biopsy, a median glomerular cross-sectional area of 1,250,000ü渭m2, corresponding to 40 glomerular cross-sections, an…	not provided	To ensure there was similar starting material for each sample for expression analysis, pre-amplification conditions were determined by GAPDH RT-PCR cycle number. Extracted RNA was submitted for expression analysis using the Nanostring nCounter庐 GX human Immunology Panel (Nanostring Technologies, Seattle, WA). The panel consists of 579 immune response genes, 6 positive controls, 6 negative control…	9606	Reporter and Capture probes against 579 mRNAs were obtained from Nanostring Technologies Seattle, WA. Data were collected and analyzed using the nCounter Digital Analyzer.	The number of barcodes hybridized to specific RNA targets on cartridges were directly counted by the nCounter Digital Analyzer with 579 fields of view setting.	Nanostring RAW 12.xlsx	Tubulointerstitial RNA was extracted by laser microdissection and submitted for nanostring analysis	For nanostring data, raw counts were normalized to the positive spike-in controls and then log2 transformed. To reduce technical bias, genes with an expression level below the mean plus two standard deviations of the negative controls were filtered out. Quantile normalization was applied to the remaining transcripts (522 for glomeruli and 502 for TI). Linear mixed effect models were used to ident…	GPL21847	Samir,,Parikh	samir.parikh@osumc.edu	6142934997	Nephrology	Ohio State University	395 W 12th Avenu, -Address 2-	Columbus	OH	43210	USA	NONE	502	23	No Response	Mixed (III/IV+V)	2	0.8	M
patient 13, First Biopsy, Tubulointerstitium [X13AT_3]	GSM6030753	LN	Homo sapiens	ln class: Class IV	FeMale	25	proteinuria (g/24hr): 1.2	serum creatinine (mg/dl): 0.6	clinical response group: No Response	total RNA	Formalin-fixed and paraffin-embedded (FFPE) kidney biopsy tissue was cut into 6-7 10渭m sections. After deparaffinization, all available glomeruli and TI were separated by laser microdissection (PALM MicroBeam, Zeiss Labs, Germany), captured and digested with proteinase K. From each biopsy, a median glomerular cross-sectional area of 1,250,000ü渭m2, corresponding to 40 glomerular cross-sections, an…	not provided	To ensure there was similar starting material for each sample for expression analysis, pre-amplification conditions were determined by GAPDH RT-PCR cycle number. Extracted RNA was submitted for expression analysis using the Nanostring nCounter庐 GX human Immunology Panel (Nanostring Technologies, Seattle, WA). The panel consists of 579 immune response genes, 6 positive controls, 6 negative control…	9606	Reporter and Capture probes against 579 mRNAs were obtained from Nanostring Technologies Seattle, WA. Data were collected and analyzed using the nCounter Digital Analyzer.	The number of barcodes hybridized to specific RNA targets on cartridges were directly counted by the nCounter Digital Analyzer with 579 fields of view setting.	Nanostring RAW 13.xlsx	Tubulointerstitial RNA was extracted by laser microdissection and submitted for nanostring analysis	For nanostring data, raw counts were normalized to the positive spike-in controls and then log2 transformed. To reduce technical bias, genes with an expression level below the mean plus two standard deviations of the negative controls were filtered out. Quantile normalization was applied to the remaining transcripts (522 for glomeruli and 502 for TI). Linear mixed effect models were used to ident…	GPL21847	Samir,,Parikh	samir.parikh@osumc.edu	6142934997	Nephrology	Ohio State University	395 W 12th Avenu, -Address 2-	Columbus	OH	43210	USA	NONE	502	25	No Response	Class IV	1.2	0.6	F
patient 17, First Biopsy, Tubulointerstitium [X17AT_3]	GSM6030754	LN	Homo sapiens	ln class: Class III	FeMale	35	proteinuria (g/24hr): 1	serum creatinine (mg/dl): 0.5	clinical response group: No Response	total RNA	Formalin-fixed and paraffin-embedded (FFPE) kidney biopsy tissue was cut into 6-7 10渭m sections. After deparaffinization, all available glomeruli and TI were separated by laser microdissection (PALM MicroBeam, Zeiss Labs, Germany), captured and digested with proteinase K. From each biopsy, a median glomerular cross-sectional area of 1,250,000ü渭m2, corresponding to 40 glomerular cross-sections, an…	not provided	To ensure there was similar starting material for each sample for expression analysis, pre-amplification conditions were determined by GAPDH RT-PCR cycle number. Extracted RNA was submitted for expression analysis using the Nanostring nCounter庐 GX human Immunology Panel (Nanostring Technologies, Seattle, WA). The panel consists of 579 immune response genes, 6 positive controls, 6 negative control…	9606	Reporter and Capture probes against 579 mRNAs were obtained from Nanostring Technologies Seattle, WA. Data were collected and analyzed using the nCounter Digital Analyzer.	The number of barcodes hybridized to specific RNA targets on cartridges were directly counted by the nCounter Digital Analyzer with 579 fields of view setting.	Nanostring RAW 13.xslx	Tubulointerstitial RNA was extracted by laser microdissection and submitted for nanostring analysis	For nanostring data, raw counts were normalized to the positive spike-in controls and then log2 transformed. To reduce technical bias, genes with an expression level below the mean plus two standard deviations of the negative controls were filtered out. Quantile normalization was applied to the remaining transcripts (522 for glomeruli and 502 for TI). Linear mixed effect models were used to ident…	GPL21847	Samir,,Parikh	samir.parikh@osumc.edu	6142934997	Nephrology	Ohio State University	395 W 12th Avenu, -Address 2-	Columbus	OH	43210	USA	NONE	502	35	No Response	Class III	1	0.5	F
patient 24, First Biopsy, Tubulointerstitium [X24AT_6]	GSM6030755	LN	Homo sapiens	ln class: Class IV	Male	36	proteinuria (g/24hr): 1.7	serum creatinine (mg/dl): 0.8	clinical response group: No Response	total RNA	Formalin-fixed and paraffin-embedded (FFPE) kidney biopsy tissue was cut into 6-7 10渭m sections. After deparaffinization, all available glomeruli and TI were separated by laser microdissection (PALM MicroBeam, Zeiss Labs, Germany), captured and digested with proteinase K. From each biopsy, a median glomerular cross-sectional area of 1,250,000ü渭m2, corresponding to 40 glomerular cross-sections, an…	not provided	To ensure there was similar starting material for each sample for expression analysis, pre-amplification conditions were determined by GAPDH RT-PCR cycle number. Extracted RNA was submitted for expression analysis using the Nanostring nCounter庐 GX human Immunology Panel (Nanostring Technologies, Seattle, WA). The panel consists of 579 immune response genes, 6 positive controls, 6 negative control…	9606	Reporter and Capture probes against 579 mRNAs were obtained from Nanostring Technologies Seattle, WA. Data were collected and analyzed using the nCounter Digital Analyzer.	The number of barcodes hybridized to specific RNA targets on cartridges were directly counted by the nCounter Digital Analyzer with 579 fields of view setting.	Nansotring RAW 16.xlsx	Tubulointerstitial RNA was extracted by laser microdissection and submitted for nanostring analysis	For nanostring data, raw counts were normalized to the positive spike-in controls and then log2 transformed. To reduce technical bias, genes with an expression level below the mean plus two standard deviations of the negative controls were filtered out. Quantile normalization was applied to the remaining transcripts (522 for glomeruli and 502 for TI). Linear mixed effect models were used to ident…	GPL21847	Samir,,Parikh	samir.parikh@osumc.edu	6142934997	Nephrology	Ohio State University	395 W 12th Avenu, -Address 2-	Columbus	OH	43210	USA	NONE	502	36	No Response	Class IV	1.7	0.8	M
patient 27, First Biopsy, Tubulointerstitium [Avg_27AT]	GSM6030756	LN	Homo sapiens	ln class: Class III	Male	36	proteinuria (g/24hr): 1.8	serum creatinine (mg/dl): 0.7	clinical response group: No Response	total RNA	Formalin-fixed and paraffin-embedded (FFPE) kidney biopsy tissue was cut into 6-7 10渭m sections. After deparaffinization, all available glomeruli and TI were separated by laser microdissection (PALM MicroBeam, Zeiss Labs, Germany), captured and digested with proteinase K. From each biopsy, a median glomerular cross-sectional area of 1,250,000ü渭m2, corresponding to 40 glomerular cross-sections, an…	not provided	To ensure there was similar starting material for each sample for expression analysis, pre-amplification conditions were determined by GAPDH RT-PCR cycle number. Extracted RNA was submitted for expression analysis using the Nanostring nCounter庐 GX human Immunology Panel (Nanostring Technologies, Seattle, WA). The panel consists of 579 immune response genes, 6 positive controls, 6 negative control…	9606	Reporter and Capture probes against 579 mRNAs were obtained from Nanostring Technologies Seattle, WA. Data were collected and analyzed using the nCounter Digital Analyzer.	The number of barcodes hybridized to specific RNA targets on cartridges were directly counted by the nCounter Digital Analyzer with 579 fields of view setting.	Nanostring RAW 14.xlsx, Nanostring RAW 18.xlsx	Tubulointerstitial RNA was extracted by laser microdissection and submitted for nanostring analysis	For nanostring data, raw counts were normalized to the positive spike-in controls and then log2 transformed. To reduce technical bias, genes with an expression level below the mean plus two standard deviations of the negative controls were filtered out. Quantile normalization was applied to the remaining transcripts (522 for glomeruli and 502 for TI). Linear mixed effect models were used to ident…	GPL21847	Samir,,Parikh	samir.parikh@osumc.edu	6142934997	Nephrology	Ohio State University	395 W 12th Avenu, -Address 2-	Columbus	OH	43210	USA	NONE	502	36	No Response	Class III	1.8	0.7	M
patient 31, First Biopsy, Tubulointerstitium [X31AT_1]	GSM6030757	LN	Homo sapiens	ln class: Class IV	FeMale	33	proteinuria (g/24hr): 5.2	serum creatinine (mg/dl): 2	clinical response group: No Response	total RNA	Formalin-fixed and paraffin-embedded (FFPE) kidney biopsy tissue was cut into 6-7 10渭m sections. After deparaffinization, all available glomeruli and TI were separated by laser microdissection (PALM MicroBeam, Zeiss Labs, Germany), captured and digested with proteinase K. From each biopsy, a median glomerular cross-sectional area of 1,250,000ü渭m2, corresponding to 40 glomerular cross-sections, an…	not provided	To ensure there was similar starting material for each sample for expression analysis, pre-amplification conditions were determined by GAPDH RT-PCR cycle number. Extracted RNA was submitted for expression analysis using the Nanostring nCounter庐 GX human Immunology Panel (Nanostring Technologies, Seattle, WA). The panel consists of 579 immune response genes, 6 positive controls, 6 negative control…	9606	Reporter and Capture probes against 579 mRNAs were obtained from Nanostring Technologies Seattle, WA. Data were collected and analyzed using the nCounter Digital Analyzer.	The number of barcodes hybridized to specific RNA targets on cartridges were directly counted by the nCounter Digital Analyzer with 579 fields of view setting.	Nanostring RAW 11.xlsx	Tubulointerstitial RNA was extracted by laser microdissection and submitted for nanostring analysis	For nanostring data, raw counts were normalized to the positive spike-in controls and then log2 transformed. To reduce technical bias, genes with an expression level below the mean plus two standard deviations of the negative controls were filtered out. Quantile normalization was applied to the remaining transcripts (522 for glomeruli and 502 for TI). Linear mixed effect models were used to ident…	GPL21847	Samir,,Parikh	samir.parikh@osumc.edu	6142934997	Nephrology	Ohio State University	395 W 12th Avenu, -Address 2-	Columbus	OH	43210	USA	NONE	502	33	No Response	Class IV	5.2	2	F
patient 38, First Biopsy, Tubulointerstitium [X38AT_5]	GSM6030758	LN	Homo sapiens	ln class: Class III	Male	23	proteinuria (g/24hr): 0.9	serum creatinine (mg/dl): 0.7	clinical response group: No Response	total RNA	Formalin-fixed and paraffin-embedded (FFPE) kidney biopsy tissue was cut into 6-7 10渭m sections. After deparaffinization, all available glomeruli and TI were separated by laser microdissection (PALM MicroBeam, Zeiss Labs, Germany), captured and digested with proteinase K. From each biopsy, a median glomerular cross-sectional area of 1,250,000ü渭m2, corresponding to 40 glomerular cross-sections, an…	not provided	To ensure there was similar starting material for each sample for expression analysis, pre-amplification conditions were determined by GAPDH RT-PCR cycle number. Extracted RNA was submitted for expression analysis using the Nanostring nCounter庐 GX human Immunology Panel (Nanostring Technologies, Seattle, WA). The panel consists of 579 immune response genes, 6 positive controls, 6 negative control…	9606	Reporter and Capture probes against 579 mRNAs were obtained from Nanostring Technologies Seattle, WA. Data were collected and analyzed using the nCounter Digital Analyzer.	The number of barcodes hybridized to specific RNA targets on cartridges were directly counted by the nCounter Digital Analyzer with 579 fields of view setting.	Nanostring RAW 2.xlsx, Nanostring RAW 15.xlsx	Tubulointerstitial RNA was extracted by laser microdissection and submitted for nanostring analysis	For nanostring data, raw counts were normalized to the positive spike-in controls and then log2 transformed. To reduce technical bias, genes with an expression level below the mean plus two standard deviations of the negative controls were filtered out. Quantile normalization was applied to the remaining transcripts (522 for glomeruli and 502 for TI). Linear mixed effect models were used to ident…	GPL21847	Samir,,Parikh	samir.parikh@osumc.edu	6142934997	Nephrology	Ohio State University	395 W 12th Avenu, -Address 2-	Columbus	OH	43210	USA	NONE	502	23	No Response	Class III	0.9	0.7	M
Patient 4, First Biopsy, Tubulointerstitium [X04AT_5]	GSM6030759	LN	Homo sapiens	ln class: Mixed (III/IV+V)	FeMale	36	proteinuria (g/24hr): 6	serum creatinine (mg/dl): 0.6	clinical response group: Partial Response	total RNA	Formalin-fixed and paraffin-embedded (FFPE) kidney biopsy tissue was cut into 6-7 10渭m sections. After deparaffinization, all available glomeruli and TI were separated by laser microdissection (PALM MicroBeam, Zeiss Labs, Germany), captured and digested with proteinase K. From each biopsy, a median glomerular cross-sectional area of 1,250,000ü渭m2, corresponding to 40 glomerular cross-sections, an…	not provided	To ensure there was similar starting material for each sample for expression analysis, pre-amplification conditions were determined by GAPDH RT-PCR cycle number. Extracted RNA was submitted for expression analysis using the Nanostring nCounter庐 GX human Immunology Panel (Nanostring Technologies, Seattle, WA). The panel consists of 579 immune response genes, 6 positive controls, 6 negative control…	9606	Reporter and Capture probes against 579 mRNAs were obtained from Nanostring Technologies Seattle, WA. Data were collected and analyzed using the nCounter Digital Analyzer.	The number of barcodes hybridized to specific RNA targets on cartridges were directly counted by the nCounter Digital Analyzer with 579 fields of view setting.	Nanostring RAW 1.xlsx, Nanostring RAW 12.xlsx, Nanostring RAW 15.xlsx	Tubulointerstitial RNA was extracted by laser microdissection and submitted for nanostring analysis	For nanostring data, raw counts were normalized to the positive spike-in controls and then log2 transformed. To reduce technical bias, genes with an expression level below the mean plus two standard deviations of the negative controls were filtered out. Quantile normalization was applied to the remaining transcripts (522 for glomeruli and 502 for TI). Linear mixed effect models were used to ident…	GPL21847	Samir,,Parikh	samir.parikh@osumc.edu	6142934997	Nephrology	Ohio State University	395 W 12th Avenu, -Address 2-	Columbus	OH	43210	USA	NONE	502	36	Partial Response	Mixed (III/IV+V)	6	0.6	F
Patient 14, First Biopsy, Tubulointerstitium [X14AT_6]	GSM6030760	LN	Homo sapiens	ln class: Class IV	FeMale	21	proteinuria (g/24hr): 1.9	serum creatinine (mg/dl): 0.8	clinical response group: Partial Response	total RNA	Formalin-fixed and paraffin-embedded (FFPE) kidney biopsy tissue was cut into 6-7 10渭m sections. After deparaffinization, all available glomeruli and TI were separated by laser microdissection (PALM MicroBeam, Zeiss Labs, Germany), captured and digested with proteinase K. From each biopsy, a median glomerular cross-sectional area of 1,250,000ü渭m2, corresponding to 40 glomerular cross-sections, an…	not provided	To ensure there was similar starting material for each sample for expression analysis, pre-amplification conditions were determined by GAPDH RT-PCR cycle number. Extracted RNA was submitted for expression analysis using the Nanostring nCounter庐 GX human Immunology Panel (Nanostring Technologies, Seattle, WA). The panel consists of 579 immune response genes, 6 positive controls, 6 negative control…	9606	Reporter and Capture probes against 579 mRNAs were obtained from Nanostring Technologies Seattle, WA. Data were collected and analyzed using the nCounter Digital Analyzer.	The number of barcodes hybridized to specific RNA targets on cartridges were directly counted by the nCounter Digital Analyzer with 579 fields of view setting.	Nansotring RAW 16.xlsx	Tubulointerstitial RNA was extracted by laser microdissection and submitted for nanostring analysis	For nanostring data, raw counts were normalized to the positive spike-in controls and then log2 transformed. To reduce technical bias, genes with an expression level below the mean plus two standard deviations of the negative controls were filtered out. Quantile normalization was applied to the remaining transcripts (522 for glomeruli and 502 for TI). Linear mixed effect models were used to ident…	GPL21847	Samir,,Parikh	samir.parikh@osumc.edu	6142934997	Nephrology	Ohio State University	395 W 12th Avenu, -Address 2-	Columbus	OH	43210	USA	NONE	502	21	Partial Response	Class IV	1.9	0.8	F
Patient 16, First Biopsy, Tubulointerstitium [X16AT_5]	GSM6030761	LN	Homo sapiens	ln class: Mixed (III/IV+V)	FeMale	37	proteinuria (g/24hr): 10	serum creatinine (mg/dl): 1.5	clinical response group: Partial Response	total RNA	Formalin-fixed and paraffin-embedded (FFPE) kidney biopsy tissue was cut into 6-7 10渭m sections. After deparaffinization, all available glomeruli and TI were separated by laser microdissection (PALM MicroBeam, Zeiss Labs, Germany), captured and digested with proteinase K. From each biopsy, a median glomerular cross-sectional area of 1,250,000ü渭m2, corresponding to 40 glomerular cross-sections, an…	not provided	To ensure there was similar starting material for each sample for expression analysis, pre-amplification conditions were determined by GAPDH RT-PCR cycle number. Extracted RNA was submitted for expression analysis using the Nanostring nCounter庐 GX human Immunology Panel (Nanostring Technologies, Seattle, WA). The panel consists of 579 immune response genes, 6 positive controls, 6 negative control…	9606	Reporter and Capture probes against 579 mRNAs were obtained from Nanostring Technologies Seattle, WA. Data were collected and analyzed using the nCounter Digital Analyzer.	The number of barcodes hybridized to specific RNA targets on cartridges were directly counted by the nCounter Digital Analyzer with 579 fields of view setting.	Nanostring RAW 15.xlsx	Tubulointerstitial RNA was extracted by laser microdissection and submitted for nanostring analysis	For nanostring data, raw counts were normalized to the positive spike-in controls and then log2 transformed. To reduce technical bias, genes with an expression level below the mean plus two standard deviations of the negative controls were filtered out. Quantile normalization was applied to the remaining transcripts (522 for glomeruli and 502 for TI). Linear mixed effect models were used to ident…	GPL21847	Samir,,Parikh	samir.parikh@osumc.edu	6142934997	Nephrology	Ohio State University	395 W 12th Avenu, -Address 2-	Columbus	OH	43210	USA	NONE	502	37	Partial Response	Mixed (III/IV+V)	10	1.5	F
Patient 18, First Biopsy, Tubulointerstitium [Avg_18AT]	GSM6030762	LN	Homo sapiens	ln class: Class IV	FeMale	22	proteinuria (g/24hr): 5.9	serum creatinine (mg/dl): 1.7	clinical response group: Partial Response	total RNA	Formalin-fixed and paraffin-embedded (FFPE) kidney biopsy tissue was cut into 6-7 10渭m sections. After deparaffinization, all available glomeruli and TI were separated by laser microdissection (PALM MicroBeam, Zeiss Labs, Germany), captured and digested with proteinase K. From each biopsy, a median glomerular cross-sectional area of 1,250,000ü渭m2, corresponding to 40 glomerular cross-sections, an…	not provided	To ensure there was similar starting material for each sample for expression analysis, pre-amplification conditions were determined by GAPDH RT-PCR cycle number. Extracted RNA was submitted for expression analysis using the Nanostring nCounter庐 GX human Immunology Panel (Nanostring Technologies, Seattle, WA). The panel consists of 579 immune response genes, 6 positive controls, 6 negative control…	9606	Reporter and Capture probes against 579 mRNAs were obtained from Nanostring Technologies Seattle, WA. Data were collected and analyzed using the nCounter Digital Analyzer.	The number of barcodes hybridized to specific RNA targets on cartridges were directly counted by the nCounter Digital Analyzer with 579 fields of view setting.	Nanostring RAW 12.xlsx, Nanostring RAW 18.xlsx	Tubulointerstitial RNA was extracted by laser microdissection and submitted for nanostring analysis	For nanostring data, raw counts were normalized to the positive spike-in controls and then log2 transformed. To reduce technical bias, genes with an expression level below the mean plus two standard deviations of the negative controls were filtered out. Quantile normalization was applied to the remaining transcripts (522 for glomeruli and 502 for TI). Linear mixed effect models were used to ident…	GPL21847	Samir,,Parikh	samir.parikh@osumc.edu	6142934997	Nephrology	Ohio State University	395 W 12th Avenu, -Address 2-	Columbus	OH	43210	USA	NONE	502	22	Partial Response	Class IV	5.9	1.7	F
Patient 21, First Biopsy, Tubulointerstitium [X21AT_1]	GSM6030763	LN	Homo sapiens	ln class: Class IV	FeMale	42	proteinuria (g/24hr): 5	serum creatinine (mg/dl): 3.1	clinical response group: Partial Response	total RNA	Formalin-fixed and paraffin-embedded (FFPE) kidney biopsy tissue was cut into 6-7 10渭m sections. After deparaffinization, all available glomeruli and TI were separated by laser microdissection (PALM MicroBeam, Zeiss Labs, Germany), captured and digested with proteinase K. From each biopsy, a median glomerular cross-sectional area of 1,250,000ü渭m2, corresponding to 40 glomerular cross-sections, an…	not provided	To ensure there was similar starting material for each sample for expression analysis, pre-amplification conditions were determined by GAPDH RT-PCR cycle number. Extracted RNA was submitted for expression analysis using the Nanostring nCounter庐 GX human Immunology Panel (Nanostring Technologies, Seattle, WA). The panel consists of 579 immune response genes, 6 positive controls, 6 negative control…	9606	Reporter and Capture probes against 579 mRNAs were obtained from Nanostring Technologies Seattle, WA. Data were collected and analyzed using the nCounter Digital Analyzer.	The number of barcodes hybridized to specific RNA targets on cartridges were directly counted by the nCounter Digital Analyzer with 579 fields of view setting.	Nanostring RAW 11.xlsx	Tubulointerstitial RNA was extracted by laser microdissection and submitted for nanostring analysis	For nanostring data, raw counts were normalized to the positive spike-in controls and then log2 transformed. To reduce technical bias, genes with an expression level below the mean plus two standard deviations of the negative controls were filtered out. Quantile normalization was applied to the remaining transcripts (522 for glomeruli and 502 for TI). Linear mixed effect models were used to ident…	GPL21847	Samir,,Parikh	samir.parikh@osumc.edu	6142934997	Nephrology	Ohio State University	395 W 12th Avenu, -Address 2-	Columbus	OH	43210	USA	NONE	502	42	Partial Response	Class IV	5	3.1	F
Patient 22, First Biopsy, Tubulointerstitium [X22AT_7]	GSM6030764	LN	Homo sapiens	ln class: Class IV	FeMale	30	proteinuria (g/24hr): 2.2	serum creatinine (mg/dl): 1.1	clinical response group: Partial Response	total RNA	Formalin-fixed and paraffin-embedded (FFPE) kidney biopsy tissue was cut into 6-7 10渭m sections. After deparaffinization, all available glomeruli and TI were separated by laser microdissection (PALM MicroBeam, Zeiss Labs, Germany), captured and digested with proteinase K. From each biopsy, a median glomerular cross-sectional area of 1,250,000ü渭m2, corresponding to 40 glomerular cross-sections, an…	not provided	To ensure there was similar starting material for each sample for expression analysis, pre-amplification conditions were determined by GAPDH RT-PCR cycle number. Extracted RNA was submitted for expression analysis using the Nanostring nCounter庐 GX human Immunology Panel (Nanostring Technologies, Seattle, WA). The panel consists of 579 immune response genes, 6 positive controls, 6 negative control…	9606	Reporter and Capture probes against 579 mRNAs were obtained from Nanostring Technologies Seattle, WA. Data were collected and analyzed using the nCounter Digital Analyzer.	The number of barcodes hybridized to specific RNA targets on cartridges were directly counted by the nCounter Digital Analyzer with 579 fields of view setting.	Nanostring RAW 17.xlsx	Tubulointerstitial RNA was extracted by laser microdissection and submitted for nanostring analysis	For nanostring data, raw counts were normalized to the positive spike-in controls and then log2 transformed. To reduce technical bias, genes with an expression level below the mean plus two standard deviations of the negative controls were filtered out. Quantile normalization was applied to the remaining transcripts (522 for glomeruli and 502 for TI). Linear mixed effect models were used to ident…	GPL21847	Samir,,Parikh	samir.parikh@osumc.edu	6142934997	Nephrology	Ohio State University	395 W 12th Avenu, -Address 2-	Columbus	OH	43210	USA	NONE	502	30	Partial Response	Class IV	2.2	1.1	F
Patient 28, First Biopsy, Tubulointerstitium [X28AT_4]	GSM6030765	LN	Homo sapiens	ln class: Class IV	FeMale	18	proteinuria (g/24hr): 3.8	serum creatinine (mg/dl): 0.8	clinical response group: Partial Response	total RNA	Formalin-fixed and paraffin-embedded (FFPE) kidney biopsy tissue was cut into 6-7 10渭m sections. After deparaffinization, all available glomeruli and TI were separated by laser microdissection (PALM MicroBeam, Zeiss Labs, Germany), captured and digested with proteinase K. From each biopsy, a median glomerular cross-sectional area of 1,250,000ü渭m2, corresponding to 40 glomerular cross-sections, an…	not provided	To ensure there was similar starting material for each sample for expression analysis, pre-amplification conditions were determined by GAPDH RT-PCR cycle number. Extracted RNA was submitted for expression analysis using the Nanostring nCounter庐 GX human Immunology Panel (Nanostring Technologies, Seattle, WA). The panel consists of 579 immune response genes, 6 positive controls, 6 negative control…	9606	Reporter and Capture probes against 579 mRNAs were obtained from Nanostring Technologies Seattle, WA. Data were collected and analyzed using the nCounter Digital Analyzer.	The number of barcodes hybridized to specific RNA targets on cartridges were directly counted by the nCounter Digital Analyzer with 579 fields of view setting.	Nanostring RAW 14.xlsx	Tubulointerstitial RNA was extracted by laser microdissection and submitted for nanostring analysis	For nanostring data, raw counts were normalized to the positive spike-in controls and then log2 transformed. To reduce technical bias, genes with an expression level below the mean plus two standard deviations of the negative controls were filtered out. Quantile normalization was applied to the remaining transcripts (522 for glomeruli and 502 for TI). Linear mixed effect models were used to ident…	GPL21847	Samir,,Parikh	samir.parikh@osumc.edu	6142934997	Nephrology	Ohio State University	395 W 12th Avenu, -Address 2-	Columbus	OH	43210	USA	NONE	502	18	Partial Response	Class IV	3.8	0.8	F
Patient 29, First Biopsy, Tubulointerstitium [X29AT_7]	GSM6030766	LN	Homo sapiens	ln class: Class III	FeMale	22	proteinuria (g/24hr): 3	serum creatinine (mg/dl): 0.8	clinical response group: Partial Response	total RNA	Formalin-fixed and paraffin-embedded (FFPE) kidney biopsy tissue was cut into 6-7 10渭m sections. After deparaffinization, all available glomeruli and TI were separated by laser microdissection (PALM MicroBeam, Zeiss Labs, Germany), captured and digested with proteinase K. From each biopsy, a median glomerular cross-sectional area of 1,250,000ü渭m2, corresponding to 40 glomerular cross-sections, an…	not provided	To ensure there was similar starting material for each sample for expression analysis, pre-amplification conditions were determined by GAPDH RT-PCR cycle number. Extracted RNA was submitted for expression analysis using the Nanostring nCounter庐 GX human Immunology Panel (Nanostring Technologies, Seattle, WA). The panel consists of 579 immune response genes, 6 positive controls, 6 negative control…	9606	Reporter and Capture probes against 579 mRNAs were obtained from Nanostring Technologies Seattle, WA. Data were collected and analyzed using the nCounter Digital Analyzer.	The number of barcodes hybridized to specific RNA targets on cartridges were directly counted by the nCounter Digital Analyzer with 579 fields of view setting.	Nanostring RAW 17.xlsx	Tubulointerstitial RNA was extracted by laser microdissection and submitted for nanostring analysis	For nanostring data, raw counts were normalized to the positive spike-in controls and then log2 transformed. To reduce technical bias, genes with an expression level below the mean plus two standard deviations of the negative controls were filtered out. Quantile normalization was applied to the remaining transcripts (522 for glomeruli and 502 for TI). Linear mixed effect models were used to ident…	GPL21847	Samir,,Parikh	samir.parikh@osumc.edu	6142934997	Nephrology	Ohio State University	395 W 12th Avenu, -Address 2-	Columbus	OH	43210	USA	NONE	502	22	Partial Response	Class III	3	0.8	F
Patient 33, First Biopsy, Tubulointerstitium [X33AT_10]	GSM6030767	LN	Homo sapiens	ln class: Class IV	FeMale	36	proteinuria (g/24hr): 5.8	serum creatinine (mg/dl): 0.6	clinical response group: Partial Response	total RNA	Formalin-fixed and paraffin-embedded (FFPE) kidney biopsy tissue was cut into 6-7 10渭m sections. After deparaffinization, all available glomeruli and TI were separated by laser microdissection (PALM MicroBeam, Zeiss Labs, Germany), captured and digested with proteinase K. From each biopsy, a median glomerular cross-sectional area of 1,250,000ü渭m2, corresponding to 40 glomerular cross-sections, an…	not provided	To ensure there was similar starting material for each sample for expression analysis, pre-amplification conditions were determined by GAPDH RT-PCR cycle number. Extracted RNA was submitted for expression analysis using the Nanostring nCounter庐 GX human Immunology Panel (Nanostring Technologies, Seattle, WA). The panel consists of 579 immune response genes, 6 positive controls, 6 negative control…	9606	Reporter and Capture probes against 579 mRNAs were obtained from Nanostring Technologies Seattle, WA. Data were collected and analyzed using the nCounter Digital Analyzer.	The number of barcodes hybridized to specific RNA targets on cartridges were directly counted by the nCounter Digital Analyzer with 579 fields of view setting.	Nanostring RAW 20.xlsx	Tubulointerstitial RNA was extracted by laser microdissection and submitted for nanostring analysis	For nanostring data, raw counts were normalized to the positive spike-in controls and then log2 transformed. To reduce technical bias, genes with an expression level below the mean plus two standard deviations of the negative controls were filtered out. Quantile normalization was applied to the remaining transcripts (522 for glomeruli and 502 for TI). Linear mixed effect models were used to ident…	GPL21847	Samir,,Parikh	samir.parikh@osumc.edu	6142934997	Nephrology	Ohio State University	395 W 12th Avenu, -Address 2-	Columbus	OH	43210	USA	NONE	502	36	Partial Response	Class IV	5.8	0.6	F
Patient 35, First Biopsy, Tubulointerstitium [X35AT_9]	GSM6030768	LN	Homo sapiens	ln class: Class IV	FeMale	22	proteinuria (g/24hr): 2.3	serum creatinine (mg/dl): 0.7	clinical response group: Partial Response	total RNA	Formalin-fixed and paraffin-embedded (FFPE) kidney biopsy tissue was cut into 6-7 10渭m sections. After deparaffinization, all available glomeruli and TI were separated by laser microdissection (PALM MicroBeam, Zeiss Labs, Germany), captured and digested with proteinase K. From each biopsy, a median glomerular cross-sectional area of 1,250,000ü渭m2, corresponding to 40 glomerular cross-sections, an…	not provided	To ensure there was similar starting material for each sample for expression analysis, pre-amplification conditions were determined by GAPDH RT-PCR cycle number. Extracted RNA was submitted for expression analysis using the Nanostring nCounter庐 GX human Immunology Panel (Nanostring Technologies, Seattle, WA). The panel consists of 579 immune response genes, 6 positive controls, 6 negative control…	9606	Reporter and Capture probes against 579 mRNAs were obtained from Nanostring Technologies Seattle, WA. Data were collected and analyzed using the nCounter Digital Analyzer.	The number of barcodes hybridized to specific RNA targets on cartridges were directly counted by the nCounter Digital Analyzer with 579 fields of view setting.	Nanostring RAW 19.xlsx	Tubulointerstitial RNA was extracted by laser microdissection and submitted for nanostring analysis	For nanostring data, raw counts were normalized to the positive spike-in controls and then log2 transformed. To reduce technical bias, genes with an expression level below the mean plus two standard deviations of the negative controls were filtered out. Quantile normalization was applied to the remaining transcripts (522 for glomeruli and 502 for TI). Linear mixed effect models were used to ident…	GPL21847	Samir,,Parikh	samir.parikh@osumc.edu	6142934997	Nephrology	Ohio State University	395 W 12th Avenu, -Address 2-	Columbus	OH	43210	USA	NONE	502	22	Partial Response	Class IV	2.3	0.7	F
Patient 40, First Biopsy, Tubulointerstitium [X40AT_8]	GSM6030769	LN	Homo sapiens	ln class: Class IV	FeMale	25	proteinuria (g/24hr): 1.7	serum creatinine (mg/dl): 1.0	clinical response group: Partial Response	total RNA	Formalin-fixed and paraffin-embedded (FFPE) kidney biopsy tissue was cut into 6-7 10渭m sections. After deparaffinization, all available glomeruli and TI were separated by laser microdissection (PALM MicroBeam, Zeiss Labs, Germany), captured and digested with proteinase K. From each biopsy, a median glomerular cross-sectional area of 1,250,000ü渭m2, corresponding to 40 glomerular cross-sections, an…	not provided	To ensure there was similar starting material for each sample for expression analysis, pre-amplification conditions were determined by GAPDH RT-PCR cycle number. Extracted RNA was submitted for expression analysis using the Nanostring nCounter庐 GX human Immunology Panel (Nanostring Technologies, Seattle, WA). The panel consists of 579 immune response genes, 6 positive controls, 6 negative control…	9606	Reporter and Capture probes against 579 mRNAs were obtained from Nanostring Technologies Seattle, WA. Data were collected and analyzed using the nCounter Digital Analyzer.	The number of barcodes hybridized to specific RNA targets on cartridges were directly counted by the nCounter Digital Analyzer with 579 fields of view setting.	Nanostring RAW 18.xlsx	Tubulointerstitial RNA was extracted by laser microdissection and submitted for nanostring analysis	For nanostring data, raw counts were normalized to the positive spike-in controls and then log2 transformed. To reduce technical bias, genes with an expression level below the mean plus two standard deviations of the negative controls were filtered out. Quantile normalization was applied to the remaining transcripts (522 for glomeruli and 502 for TI). Linear mixed effect models were used to ident…	GPL21847	Samir,,Parikh	samir.parikh@osumc.edu	6142934997	Nephrology	Ohio State University	395 W 12th Avenu, -Address 2-	Columbus	OH	43210	USA	NONE	502	25	Partial Response	Class IV	1.7	1	F
Patient 41, First Biopsy, Tubulointerstitium [X41AT_2]	GSM6030770	LN	Homo sapiens	ln class: Class IV	FeMale	38	proteinuria (g/24hr): 6.6	serum creatinine (mg/dl): 1.4	clinical response group: Partial Response	total RNA	Formalin-fixed and paraffin-embedded (FFPE) kidney biopsy tissue was cut into 6-7 10渭m sections. After deparaffinization, all available glomeruli and TI were separated by laser microdissection (PALM MicroBeam, Zeiss Labs, Germany), captured and digested with proteinase K. From each biopsy, a median glomerular cross-sectional area of 1,250,000ü渭m2, corresponding to 40 glomerular cross-sections, an…	not provided	To ensure there was similar starting material for each sample for expression analysis, pre-amplification conditions were determined by GAPDH RT-PCR cycle number. Extracted RNA was submitted for expression analysis using the Nanostring nCounter庐 GX human Immunology Panel (Nanostring Technologies, Seattle, WA). The panel consists of 579 immune response genes, 6 positive controls, 6 negative control…	9606	Reporter and Capture probes against 579 mRNAs were obtained from Nanostring Technologies Seattle, WA. Data were collected and analyzed using the nCounter Digital Analyzer.	The number of barcodes hybridized to specific RNA targets on cartridges were directly counted by the nCounter Digital Analyzer with 579 fields of view setting.	Nanostring RAW 12.xlsx	Tubulointerstitial RNA was extracted by laser microdissection and submitted for nanostring analysis	For nanostring data, raw counts were normalized to the positive spike-in controls and then log2 transformed. To reduce technical bias, genes with an expression level below the mean plus two standard deviations of the negative controls were filtered out. Quantile normalization was applied to the remaining transcripts (522 for glomeruli and 502 for TI). Linear mixed effect models were used to ident…	GPL21847	Samir,,Parikh	samir.parikh@osumc.edu	6142934997	Nephrology	Ohio State University	395 W 12th Avenu, -Address 2-	Columbus	OH	43210	USA	NONE	502	38	Partial Response	Class IV	6.6	1.4	F
Patient 56, First Biopsy, Tubulointerstitium [X56AT_1]	GSM6030771	LN	Homo sapiens	ln class: Class IV	FeMale	38	proteinuria (g/24hr): 3.4	serum creatinine (mg/dl): 0.8	clinical response group: Partial Response	total RNA	Formalin-fixed and paraffin-embedded (FFPE) kidney biopsy tissue was cut into 6-7 10渭m sections. After deparaffinization, all available glomeruli and TI were separated by laser microdissection (PALM MicroBeam, Zeiss Labs, Germany), captured and digested with proteinase K. From each biopsy, a median glomerular cross-sectional area of 1,250,000ü渭m2, corresponding to 40 glomerular cross-sections, an…	not provided	To ensure there was similar starting material for each sample for expression analysis, pre-amplification conditions were determined by GAPDH RT-PCR cycle number. Extracted RNA was submitted for expression analysis using the Nanostring nCounter庐 GX human Immunology Panel (Nanostring Technologies, Seattle, WA). The panel consists of 579 immune response genes, 6 positive controls, 6 negative control…	9606	Reporter and Capture probes against 579 mRNAs were obtained from Nanostring Technologies Seattle, WA. Data were collected and analyzed using the nCounter Digital Analyzer.	The number of barcodes hybridized to specific RNA targets on cartridges were directly counted by the nCounter Digital Analyzer with 579 fields of view setting.	Nanostring RAW 11.xlsx	Tubulointerstitial RNA was extracted by laser microdissection and submitted for nanostring analysis	For nanostring data, raw counts were normalized to the positive spike-in controls and then log2 transformed. To reduce technical bias, genes with an expression level below the mean plus two standard deviations of the negative controls were filtered out. Quantile normalization was applied to the remaining transcripts (522 for glomeruli and 502 for TI). Linear mixed effect models were used to ident…	GPL21847	Samir,,Parikh	samir.parikh@osumc.edu	6142934997	Nephrology	Ohio State University	395 W 12th Avenu, -Address 2-	Columbus	OH	43210	USA	NONE	502	38	Partial Response	Class IV	3.4	0.8	F
Pre-implantation kidney donor control 1 [X1XNG_10]	GSM6030718	HC	Homo sapiens	ln class: Healthy control						total RNA	Formalin-fixed and paraffin-embedded (FFPE) kidney biopsy tissue was cut into 6-7 10渭m sections. After deparaffinization, all available glomeruli and TI were separated by laser microdissection (PALM MicroBeam, Zeiss Labs, Germany), captured and digested with proteinase K. From each biopsy, a median glomerular cross-sectional area of 1,250,000ü渭m2, corresponding to 40 glomerular cross-sections, an…	not provided	To ensure there was similar starting material for each sample for expression analysis, pre-amplification conditions were determined by GAPDH RT-PCR cycle number. Extracted RNA was submitted for expression analysis using the Nanostring nCounter庐 GX human Immunology Panel (Nanostring Technologies, Seattle, WA). The panel consists of 579 immune response genes, 6 positive controls, 6 negative control…	9606	Reporter and Capture probes against 579 mRNAs were obtained from Nanostring Technologies Seattle, WA. Data were collected and analyzed using the nCounter Digital Analyzer.	The number of barcodes hybridized to specific RNA targets on cartridges were directly counted by the nCounter Digital Analyzer with 579 fields of view setting.	Nanostring RAW 8.xlsx	Glomerular RNA was extracted by laser microdissection and submitted for nanostring analysis	For nanostring data, raw counts were normalized to the positive spike-in controls and then log2 transformed. To reduce technical bias, genes with an expression level below the mean plus two standard deviations of the negative controls were filtered out. Quantile normalization was applied to the remaining transcripts (522 for glomeruli and 502 for TI). Linear mixed effect models were used to ident…	GPL21847	Samir,,Parikh	samir.parikh@osumc.edu	6142934997	Nephrology	Ohio State University	395 W 12th Avenu, -Address 2-	Columbus	OH	43210	USA	NONE	522	NA	NA	Healthy control	NA	NA	NA
Pre-implantation kidney donor control 2 [X2XNG_10]	GSM6030719	HC	Homo sapiens	ln class: Healthy control						total RNA	Formalin-fixed and paraffin-embedded (FFPE) kidney biopsy tissue was cut into 6-7 10渭m sections. After deparaffinization, all available glomeruli and TI were separated by laser microdissection (PALM MicroBeam, Zeiss Labs, Germany), captured and digested with proteinase K. From each biopsy, a median glomerular cross-sectional area of 1,250,000ü渭m2, corresponding to 40 glomerular cross-sections, an…	not provided	To ensure there was similar starting material for each sample for expression analysis, pre-amplification conditions were determined by GAPDH RT-PCR cycle number. Extracted RNA was submitted for expression analysis using the Nanostring nCounter庐 GX human Immunology Panel (Nanostring Technologies, Seattle, WA). The panel consists of 579 immune response genes, 6 positive controls, 6 negative control…	9606	Reporter and Capture probes against 579 mRNAs were obtained from Nanostring Technologies Seattle, WA. Data were collected and analyzed using the nCounter Digital Analyzer.	The number of barcodes hybridized to specific RNA targets on cartridges were directly counted by the nCounter Digital Analyzer with 579 fields of view setting.	Nanostring RAW 8.xlsx	Glomerular RNA was extracted by laser microdissection and submitted for nanostring analysis	For nanostring data, raw counts were normalized to the positive spike-in controls and then log2 transformed. To reduce technical bias, genes with an expression level below the mean plus two standard deviations of the negative controls were filtered out. Quantile normalization was applied to the remaining transcripts (522 for glomeruli and 502 for TI). Linear mixed effect models were used to ident…	GPL21847	Samir,,Parikh	samir.parikh@osumc.edu	6142934997	Nephrology	Ohio State University	395 W 12th Avenu, -Address 2-	Columbus	OH	43210	USA	NONE	522	NA	NA	Healthy control	NA	NA	NA
Pre-implantation kidney donor control 3 [X3XNG_1]	GSM6030720	HC	Homo sapiens	ln class: Healthy control						total RNA	Formalin-fixed and paraffin-embedded (FFPE) kidney biopsy tissue was cut into 6-7 10渭m sections. After deparaffinization, all available glomeruli and TI were separated by laser microdissection (PALM MicroBeam, Zeiss Labs, Germany), captured and digested with proteinase K. From each biopsy, a median glomerular cross-sectional area of 1,250,000ü渭m2, corresponding to 40 glomerular cross-sections, an…	not provided	To ensure there was similar starting material for each sample for expression analysis, pre-amplification conditions were determined by GAPDH RT-PCR cycle number. Extracted RNA was submitted for expression analysis using the Nanostring nCounter庐 GX human Immunology Panel (Nanostring Technologies, Seattle, WA). The panel consists of 579 immune response genes, 6 positive controls, 6 negative control…	9606	Reporter and Capture probes against 579 mRNAs were obtained from Nanostring Technologies Seattle, WA. Data were collected and analyzed using the nCounter Digital Analyzer.	The number of barcodes hybridized to specific RNA targets on cartridges were directly counted by the nCounter Digital Analyzer with 579 fields of view setting.	Nanostring RAW 9.xlsx	Glomerular RNA was extracted by laser microdissection and submitted for nanostring analysis	For nanostring data, raw counts were normalized to the positive spike-in controls and then log2 transformed. To reduce technical bias, genes with an expression level below the mean plus two standard deviations of the negative controls were filtered out. Quantile normalization was applied to the remaining transcripts (522 for glomeruli and 502 for TI). Linear mixed effect models were used to ident…	GPL21847	Samir,,Parikh	samir.parikh@osumc.edu	6142934997	Nephrology	Ohio State University	395 W 12th Avenu, -Address 2-	Columbus	OH	43210	USA	NONE	522	NA	NA	Healthy control	NA	NA	NA
Pre-implantation kidney donor control 4 [X4XNG_1]	GSM6030721	HC	Homo sapiens	ln class: Healthy control						total RNA	Formalin-fixed and paraffin-embedded (FFPE) kidney biopsy tissue was cut into 6-7 10渭m sections. After deparaffinization, all available glomeruli and TI were separated by laser microdissection (PALM MicroBeam, Zeiss Labs, Germany), captured and digested with proteinase K. From each biopsy, a median glomerular cross-sectional area of 1,250,000ü渭m2, corresponding to 40 glomerular cross-sections, an…	not provided	To ensure there was similar starting material for each sample for expression analysis, pre-amplification conditions were determined by GAPDH RT-PCR cycle number. Extracted RNA was submitted for expression analysis using the Nanostring nCounter庐 GX human Immunology Panel (Nanostring Technologies, Seattle, WA). The panel consists of 579 immune response genes, 6 positive controls, 6 negative control…	9606	Reporter and Capture probes against 579 mRNAs were obtained from Nanostring Technologies Seattle, WA. Data were collected and analyzed using the nCounter Digital Analyzer.	The number of barcodes hybridized to specific RNA targets on cartridges were directly counted by the nCounter Digital Analyzer with 579 fields of view setting.	Nanostring RAW 9.xlsx	Glomerular RNA was extracted by laser microdissection and submitted for nanostring analysis	For nanostring data, raw counts were normalized to the positive spike-in controls and then log2 transformed. To reduce technical bias, genes with an expression level below the mean plus two standard deviations of the negative controls were filtered out. Quantile normalization was applied to the remaining transcripts (522 for glomeruli and 502 for TI). Linear mixed effect models were used to ident…	GPL21847	Samir,,Parikh	samir.parikh@osumc.edu	6142934997	Nephrology	Ohio State University	395 W 12th Avenu, -Address 2-	Columbus	OH	43210	USA	NONE	522	NA	NA	Healthy control	NA	NA	NA
Pre-implantation kidney donor control 5 [X5XNG1_2]	GSM6030722	HC	Homo sapiens	ln class: Healthy control						total RNA	Formalin-fixed and paraffin-embedded (FFPE) kidney biopsy tissue was cut into 6-7 10渭m sections. After deparaffinization, all available glomeruli and TI were separated by laser microdissection (PALM MicroBeam, Zeiss Labs, Germany), captured and digested with proteinase K. From each biopsy, a median glomerular cross-sectional area of 1,250,000ü渭m2, corresponding to 40 glomerular cross-sections, an…	not provided	To ensure there was similar starting material for each sample for expression analysis, pre-amplification conditions were determined by GAPDH RT-PCR cycle number. Extracted RNA was submitted for expression analysis using the Nanostring nCounter庐 GX human Immunology Panel (Nanostring Technologies, Seattle, WA). The panel consists of 579 immune response genes, 6 positive controls, 6 negative control…	9606	Reporter and Capture probes against 579 mRNAs were obtained from Nanostring Technologies Seattle, WA. Data were collected and analyzed using the nCounter Digital Analyzer.	The number of barcodes hybridized to specific RNA targets on cartridges were directly counted by the nCounter Digital Analyzer with 579 fields of view setting.	Nanostring RAW 10.xlsx	Glomerular RNA was extracted by laser microdissection and submitted for nanostring analysis	For nanostring data, raw counts were normalized to the positive spike-in controls and then log2 transformed. To reduce technical bias, genes with an expression level below the mean plus two standard deviations of the negative controls were filtered out. Quantile normalization was applied to the remaining transcripts (522 for glomeruli and 502 for TI). Linear mixed effect models were used to ident…	GPL21847	Samir,,Parikh	samir.parikh@osumc.edu	6142934997	Nephrology	Ohio State University	395 W 12th Avenu, -Address 2-	Columbus	OH	43210	USA	NONE	522	NA	NA	Healthy control	NA	NA	NA
Pre-implantation kidney donor control 6 [X7XNG_2]	GSM6030723	HC	Homo sapiens	ln class: Healthy control						total RNA	Formalin-fixed and paraffin-embedded (FFPE) kidney biopsy tissue was cut into 6-7 10渭m sections. After deparaffinization, all available glomeruli and TI were separated by laser microdissection (PALM MicroBeam, Zeiss Labs, Germany), captured and digested with proteinase K. From each biopsy, a median glomerular cross-sectional area of 1,250,000ü渭m2, corresponding to 40 glomerular cross-sections, an…	not provided	To ensure there was similar starting material for each sample for expression analysis, pre-amplification conditions were determined by GAPDH RT-PCR cycle number. Extracted RNA was submitted for expression analysis using the Nanostring nCounter庐 GX human Immunology Panel (Nanostring Technologies, Seattle, WA). The panel consists of 579 immune response genes, 6 positive controls, 6 negative control…	9606	Reporter and Capture probes against 579 mRNAs were obtained from Nanostring Technologies Seattle, WA. Data were collected and analyzed using the nCounter Digital Analyzer.	The number of barcodes hybridized to specific RNA targets on cartridges were directly counted by the nCounter Digital Analyzer with 579 fields of view setting.	Nanostring RAW 10.xlsx	Glomerular RNA was extracted by laser microdissection and submitted for nanostring analysis	For nanostring data, raw counts were normalized to the positive spike-in controls and then log2 transformed. To reduce technical bias, genes with an expression level below the mean plus two standard deviations of the negative controls were filtered out. Quantile normalization was applied to the remaining transcripts (522 for glomeruli and 502 for TI). Linear mixed effect models were used to ident…	GPL21847	Samir,,Parikh	samir.parikh@osumc.edu	6142934997	Nephrology	Ohio State University	395 W 12th Avenu, -Address 2-	Columbus	OH	43210	USA	NONE	522	NA	NA	Healthy control	NA	NA	NA
Pre-implantation kidney donor control 7 [X10YG]	GSM6030724	HC	Homo sapiens	ln class: Healthy control						total RNA	Formalin-fixed and paraffin-embedded (FFPE) kidney biopsy tissue was cut into 6-7 10渭m sections. After deparaffinization, all available glomeruli and TI were separated by laser microdissection (PALM MicroBeam, Zeiss Labs, Germany), captured and digested with proteinase K. From each biopsy, a median glomerular cross-sectional area of 1,250,000ü渭m2, corresponding to 40 glomerular cross-sections, an…	not provided	To ensure there was similar starting material for each sample for expression analysis, pre-amplification conditions were determined by GAPDH RT-PCR cycle number. Extracted RNA was submitted for expression analysis using the Nanostring nCounter庐 GX human Immunology Panel (Nanostring Technologies, Seattle, WA). The panel consists of 579 immune response genes, 6 positive controls, 6 negative control…	9606	Reporter and Capture probes against 579 mRNAs were obtained from Nanostring Technologies Seattle, WA. Data were collected and analyzed using the nCounter Digital Analyzer.	The number of barcodes hybridized to specific RNA targets on cartridges were directly counted by the nCounter Digital Analyzer with 579 fields of view setting.	Nanostring RAW 6.xlsx, Nanostring RAW 9.xlsx	Glomerular RNA was extracted by laser microdissection and submitted for nanostring analysis	For nanostring data, raw counts were normalized to the positive spike-in controls and then log2 transformed. To reduce technical bias, genes with an expression level below the mean plus two standard deviations of the negative controls were filtered out. Quantile normalization was applied to the remaining transcripts (522 for glomeruli and 502 for TI). Linear mixed effect models were used to ident…	GPL21847	Samir,,Parikh	samir.parikh@osumc.edu	6142934997	Nephrology	Ohio State University	395 W 12th Avenu, -Address 2-	Columbus	OH	43210	USA	NONE	522	NA	NA	Healthy control	NA	NA	NA
Pre-implantation kidney donor control 8 [X15YG]	GSM6030725	HC	Homo sapiens	ln class: Healthy control						total RNA	Formalin-fixed and paraffin-embedded (FFPE) kidney biopsy tissue was cut into 6-7 10渭m sections. After deparaffinization, all available glomeruli and TI were separated by laser microdissection (PALM MicroBeam, Zeiss Labs, Germany), captured and digested with proteinase K. From each biopsy, a median glomerular cross-sectional area of 1,250,000ü渭m2, corresponding to 40 glomerular cross-sections, an…	not provided	To ensure there was similar starting material for each sample for expression analysis, pre-amplification conditions were determined by GAPDH RT-PCR cycle number. Extracted RNA was submitted for expression analysis using the Nanostring nCounter庐 GX human Immunology Panel (Nanostring Technologies, Seattle, WA). The panel consists of 579 immune response genes, 6 positive controls, 6 negative control…	9606	Reporter and Capture probes against 579 mRNAs were obtained from Nanostring Technologies Seattle, WA. Data were collected and analyzed using the nCounter Digital Analyzer.	The number of barcodes hybridized to specific RNA targets on cartridges were directly counted by the nCounter Digital Analyzer with 579 fields of view setting.	Nanostring RAW 5.xlsx, Nanostring RAW 6.xlsx, Nanostring RAW 7.xlsx	Glomerular RNA was extracted by laser microdissection and submitted for nanostring analysis	For nanostring data, raw counts were normalized to the positive spike-in controls and then log2 transformed. To reduce technical bias, genes with an expression level below the mean plus two standard deviations of the negative controls were filtered out. Quantile normalization was applied to the remaining transcripts (522 for glomeruli and 502 for TI). Linear mixed effect models were used to ident…	GPL21847	Samir,,Parikh	samir.parikh@osumc.edu	6142934997	Nephrology	Ohio State University	395 W 12th Avenu, -Address 2-	Columbus	OH	43210	USA	NONE	522	NA	NA	Healthy control	NA	NA	NA
Pre-implantation kidney donor control 9 [X16YG]	GSM6030726	HC	Homo sapiens	ln class: Healthy control						total RNA	Formalin-fixed and paraffin-embedded (FFPE) kidney biopsy tissue was cut into 6-7 10渭m sections. After deparaffinization, all available glomeruli and TI were separated by laser microdissection (PALM MicroBeam, Zeiss Labs, Germany), captured and digested with proteinase K. From each biopsy, a median glomerular cross-sectional area of 1,250,000ü渭m2, corresponding to 40 glomerular cross-sections, an…	not provided	To ensure there was similar starting material for each sample for expression analysis, pre-amplification conditions were determined by GAPDH RT-PCR cycle number. Extracted RNA was submitted for expression analysis using the Nanostring nCounter庐 GX human Immunology Panel (Nanostring Technologies, Seattle, WA). The panel consists of 579 immune response genes, 6 positive controls, 6 negative control…	9606	Reporter and Capture probes against 579 mRNAs were obtained from Nanostring Technologies Seattle, WA. Data were collected and analyzed using the nCounter Digital Analyzer.	The number of barcodes hybridized to specific RNA targets on cartridges were directly counted by the nCounter Digital Analyzer with 579 fields of view setting.	Nanostring RAW 5.xlsx, Nanostring RAW 6.xlsx, Nanostring RAW 7.xlsx	Glomerular RNA was extracted by laser microdissection and submitted for nanostring analysis	For nanostring data, raw counts were normalized to the positive spike-in controls and then log2 transformed. To reduce technical bias, genes with an expression level below the mean plus two standard deviations of the negative controls were filtered out. Quantile normalization was applied to the remaining transcripts (522 for glomeruli and 502 for TI). Linear mixed effect models were used to ident…	GPL21847	Samir,,Parikh	samir.parikh@osumc.edu	6142934997	Nephrology	Ohio State University	395 W 12th Avenu, -Address 2-	Columbus	OH	43210	USA	NONE	522	NA	NA	Healthy control	NA	NA	NA
Pre-implantation kidney donor control 1 [X1XN_7T]	GSM6030819	HC	Homo sapiens	ln class: Healthy control						total RNA	Formalin-fixed and paraffin-embedded (FFPE) kidney biopsy tissue was cut into 6-7 10渭m sections. After deparaffinization, all available glomeruli and TI were separated by laser microdissection (PALM MicroBeam, Zeiss Labs, Germany), captured and digested with proteinase K. From each biopsy, a median glomerular cross-sectional area of 1,250,000ü渭m2, corresponding to 40 glomerular cross-sections, an…	not provided	To ensure there was similar starting material for each sample for expression analysis, pre-amplification conditions were determined by GAPDH RT-PCR cycle number. Extracted RNA was submitted for expression analysis using the Nanostring nCounter庐 GX human Immunology Panel (Nanostring Technologies, Seattle, WA). The panel consists of 579 immune response genes, 6 positive controls, 6 negative control…	9606	Reporter and Capture probes against 579 mRNAs were obtained from Nanostring Technologies Seattle, WA. Data were collected and analyzed using the nCounter Digital Analyzer.	The number of barcodes hybridized to specific RNA targets on cartridges were directly counted by the nCounter Digital Analyzer with 579 fields of view setting.	Nanostring RAW 17.xlsx		For nanostring data, raw counts were normalized to the positive spike-in controls and then log2 transformed. To reduce technical bias, genes with an expression level below the mean plus two standard deviations of the negative controls were filtered out. Quantile normalization was applied to the remaining transcripts (522 for glomeruli and 502 for TI). Linear mixed effect models were used to ident…	GPL21847	Samir,,Parikh	samir.parikh@osumc.edu	6142934997	Nephrology	Ohio State University	395 W 12th Avenu, -Address 2-	Columbus	OH	43210	USA	NONE	502	NA	NA	Healthy control	NA	NA	NA
Pre-implantation kidney donor control 2 [X2XN_7T]	GSM6030820	HC	Homo sapiens	ln class: Healthy control						total RNA	Formalin-fixed and paraffin-embedded (FFPE) kidney biopsy tissue was cut into 6-7 10渭m sections. After deparaffinization, all available glomeruli and TI were separated by laser microdissection (PALM MicroBeam, Zeiss Labs, Germany), captured and digested with proteinase K. From each biopsy, a median glomerular cross-sectional area of 1,250,000ü渭m2, corresponding to 40 glomerular cross-sections, an…	not provided	To ensure there was similar starting material for each sample for expression analysis, pre-amplification conditions were determined by GAPDH RT-PCR cycle number. Extracted RNA was submitted for expression analysis using the Nanostring nCounter庐 GX human Immunology Panel (Nanostring Technologies, Seattle, WA). The panel consists of 579 immune response genes, 6 positive controls, 6 negative control…	9606	Reporter and Capture probes against 579 mRNAs were obtained from Nanostring Technologies Seattle, WA. Data were collected and analyzed using the nCounter Digital Analyzer.	The number of barcodes hybridized to specific RNA targets on cartridges were directly counted by the nCounter Digital Analyzer with 579 fields of view setting.	Nanostring RAW 17.xlsx		For nanostring data, raw counts were normalized to the positive spike-in controls and then log2 transformed. To reduce technical bias, genes with an expression level below the mean plus two standard deviations of the negative controls were filtered out. Quantile normalization was applied to the remaining transcripts (522 for glomeruli and 502 for TI). Linear mixed effect models were used to ident…	GPL21847	Samir,,Parikh	samir.parikh@osumc.edu	6142934997	Nephrology	Ohio State University	395 W 12th Avenu, -Address 2-	Columbus	OH	43210	USA	NONE	502	NA	NA	Healthy control	NA	NA	NA
Pre-implantation kidney donor control 3 [X3XNT_8T]	GSM6030821	HC	Homo sapiens	ln class: Healthy control						total RNA	Formalin-fixed and paraffin-embedded (FFPE) kidney biopsy tissue was cut into 6-7 10渭m sections. After deparaffinization, all available glomeruli and TI were separated by laser microdissection (PALM MicroBeam, Zeiss Labs, Germany), captured and digested with proteinase K. From each biopsy, a median glomerular cross-sectional area of 1,250,000ü渭m2, corresponding to 40 glomerular cross-sections, an…	not provided	To ensure there was similar starting material for each sample for expression analysis, pre-amplification conditions were determined by GAPDH RT-PCR cycle number. Extracted RNA was submitted for expression analysis using the Nanostring nCounter庐 GX human Immunology Panel (Nanostring Technologies, Seattle, WA). The panel consists of 579 immune response genes, 6 positive controls, 6 negative control…	9606	Reporter and Capture probes against 579 mRNAs were obtained from Nanostring Technologies Seattle, WA. Data were collected and analyzed using the nCounter Digital Analyzer.	The number of barcodes hybridized to specific RNA targets on cartridges were directly counted by the nCounter Digital Analyzer with 579 fields of view setting.	Nanostring RAW 18.xlsx		For nanostring data, raw counts were normalized to the positive spike-in controls and then log2 transformed. To reduce technical bias, genes with an expression level below the mean plus two standard deviations of the negative controls were filtered out. Quantile normalization was applied to the remaining transcripts (522 for glomeruli and 502 for TI). Linear mixed effect models were used to ident…	GPL21847	Samir,,Parikh	samir.parikh@osumc.edu	6142934997	Nephrology	Ohio State University	395 W 12th Avenu, -Address 2-	Columbus	OH	43210	USA	NONE	502	NA	NA	Healthy control	NA	NA	NA
Pre-implantation kidney donor control 4 [X4XNT_8T]	GSM6030822	HC	Homo sapiens	ln class: Healthy control						total RNA	Formalin-fixed and paraffin-embedded (FFPE) kidney biopsy tissue was cut into 6-7 10渭m sections. After deparaffinization, all available glomeruli and TI were separated by laser microdissection (PALM MicroBeam, Zeiss Labs, Germany), captured and digested with proteinase K. From each biopsy, a median glomerular cross-sectional area of 1,250,000ü渭m2, corresponding to 40 glomerular cross-sections, an…	not provided	To ensure there was similar starting material for each sample for expression analysis, pre-amplification conditions were determined by GAPDH RT-PCR cycle number. Extracted RNA was submitted for expression analysis using the Nanostring nCounter庐 GX human Immunology Panel (Nanostring Technologies, Seattle, WA). The panel consists of 579 immune response genes, 6 positive controls, 6 negative control…	9606	Reporter and Capture probes against 579 mRNAs were obtained from Nanostring Technologies Seattle, WA. Data were collected and analyzed using the nCounter Digital Analyzer.	The number of barcodes hybridized to specific RNA targets on cartridges were directly counted by the nCounter Digital Analyzer with 579 fields of view setting.	Nanostring RAW 18.xlsx		For nanostring data, raw counts were normalized to the positive spike-in controls and then log2 transformed. To reduce technical bias, genes with an expression level below the mean plus two standard deviations of the negative controls were filtered out. Quantile normalization was applied to the remaining transcripts (522 for glomeruli and 502 for TI). Linear mixed effect models were used to ident…	GPL21847	Samir,,Parikh	samir.parikh@osumc.edu	6142934997	Nephrology	Ohio State University	395 W 12th Avenu, -Address 2-	Columbus	OH	43210	USA	NONE	502	NA	NA	Healthy control	NA	NA	NA
Pre-implantation kidney donor control 5 [Avg_5XNT]	GSM6030823	HC	Homo sapiens	ln class: Healthy control						total RNA	Formalin-fixed and paraffin-embedded (FFPE) kidney biopsy tissue was cut into 6-7 10渭m sections. After deparaffinization, all available glomeruli and TI were separated by laser microdissection (PALM MicroBeam, Zeiss Labs, Germany), captured and digested with proteinase K. From each biopsy, a median glomerular cross-sectional area of 1,250,000ü渭m2, corresponding to 40 glomerular cross-sections, an…	not provided	To ensure there was similar starting material for each sample for expression analysis, pre-amplification conditions were determined by GAPDH RT-PCR cycle number. Extracted RNA was submitted for expression analysis using the Nanostring nCounter庐 GX human Immunology Panel (Nanostring Technologies, Seattle, WA). The panel consists of 579 immune response genes, 6 positive controls, 6 negative control…	9606	Reporter and Capture probes against 579 mRNAs were obtained from Nanostring Technologies Seattle, WA. Data were collected and analyzed using the nCounter Digital Analyzer.	The number of barcodes hybridized to specific RNA targets on cartridges were directly counted by the nCounter Digital Analyzer with 579 fields of view setting.	Nanostring RAW 19.xlsx, Nanostring RAW 20.xlsx		For nanostring data, raw counts were normalized to the positive spike-in controls and then log2 transformed. To reduce technical bias, genes with an expression level below the mean plus two standard deviations of the negative controls were filtered out. Quantile normalization was applied to the remaining transcripts (522 for glomeruli and 502 for TI). Linear mixed effect models were used to ident…	GPL21847	Samir,,Parikh	samir.parikh@osumc.edu	6142934997	Nephrology	Ohio State University	395 W 12th Avenu, -Address 2-	Columbus	OH	43210	USA	NONE	502	NA	NA	Healthy control	NA	NA	NA
Pre-implantation kidney donor control 6 [X6XNT_9T]	GSM6030824	HC	Homo sapiens	ln class: Healthy control						total RNA	Formalin-fixed and paraffin-embedded (FFPE) kidney biopsy tissue was cut into 6-7 10渭m sections. After deparaffinization, all available glomeruli and TI were separated by laser microdissection (PALM MicroBeam, Zeiss Labs, Germany), captured and digested with proteinase K. From each biopsy, a median glomerular cross-sectional area of 1,250,000ü渭m2, corresponding to 40 glomerular cross-sections, an…	not provided	To ensure there was similar starting material for each sample for expression analysis, pre-amplification conditions were determined by GAPDH RT-PCR cycle number. Extracted RNA was submitted for expression analysis using the Nanostring nCounter庐 GX human Immunology Panel (Nanostring Technologies, Seattle, WA). The panel consists of 579 immune response genes, 6 positive controls, 6 negative control…	9606	Reporter and Capture probes against 579 mRNAs were obtained from Nanostring Technologies Seattle, WA. Data were collected and analyzed using the nCounter Digital Analyzer.	The number of barcodes hybridized to specific RNA targets on cartridges were directly counted by the nCounter Digital Analyzer with 579 fields of view setting.	Nanostring RAW 19.xlsx		For nanostring data, raw counts were normalized to the positive spike-in controls and then log2 transformed. To reduce technical bias, genes with an expression level below the mean plus two standard deviations of the negative controls were filtered out. Quantile normalization was applied to the remaining transcripts (522 for glomeruli and 502 for TI). Linear mixed effect models were used to ident…	GPL21847	Samir,,Parikh	samir.parikh@osumc.edu	6142934997	Nephrology	Ohio State University	395 W 12th Avenu, -Address 2-	Columbus	OH	43210	USA	NONE	502	NA	NA	Healthy control	NA	NA	NA
Pre-implantation kidney donor control 7 [X7XNT_11T]	GSM6030825	HC	Homo sapiens	ln class: Healthy control						total RNA	Formalin-fixed and paraffin-embedded (FFPE) kidney biopsy tissue was cut into 6-7 10渭m sections. After deparaffinization, all available glomeruli and TI were separated by laser microdissection (PALM MicroBeam, Zeiss Labs, Germany), captured and digested with proteinase K. From each biopsy, a median glomerular cross-sectional area of 1,250,000ü渭m2, corresponding to 40 glomerular cross-sections, an…	not provided	To ensure there was similar starting material for each sample for expression analysis, pre-amplification conditions were determined by GAPDH RT-PCR cycle number. Extracted RNA was submitted for expression analysis using the Nanostring nCounter庐 GX human Immunology Panel (Nanostring Technologies, Seattle, WA). The panel consists of 579 immune response genes, 6 positive controls, 6 negative control…	9606	Reporter and Capture probes against 579 mRNAs were obtained from Nanostring Technologies Seattle, WA. Data were collected and analyzed using the nCounter Digital Analyzer.	The number of barcodes hybridized to specific RNA targets on cartridges were directly counted by the nCounter Digital Analyzer with 579 fields of view setting.	Nanostring RAW 21.xslx		For nanostring data, raw counts were normalized to the positive spike-in controls and then log2 transformed. To reduce technical bias, genes with an expression level below the mean plus two standard deviations of the negative controls were filtered out. Quantile normalization was applied to the remaining transcripts (522 for glomeruli and 502 for TI). Linear mixed effect models were used to ident…	GPL21847	Samir,,Parikh	samir.parikh@osumc.edu	6142934997	Nephrology	Ohio State University	395 W 12th Avenu, -Address 2-	Columbus	OH	43210	USA	NONE	502	NA	NA	Healthy control	NA	NA	NA
Pre-implantation kidney donor control 8 [Avg_10YT]	GSM6030826	HC	Homo sapiens	ln class: Healthy control						total RNA	Formalin-fixed and paraffin-embedded (FFPE) kidney biopsy tissue was cut into 6-7 10渭m sections. After deparaffinization, all available glomeruli and TI were separated by laser microdissection (PALM MicroBeam, Zeiss Labs, Germany), captured and digested with proteinase K. From each biopsy, a median glomerular cross-sectional area of 1,250,000ü渭m2, corresponding to 40 glomerular cross-sections, an…	not provided	To ensure there was similar starting material for each sample for expression analysis, pre-amplification conditions were determined by GAPDH RT-PCR cycle number. Extracted RNA was submitted for expression analysis using the Nanostring nCounter庐 GX human Immunology Panel (Nanostring Technologies, Seattle, WA). The panel consists of 579 immune response genes, 6 positive controls, 6 negative control…	9606	Reporter and Capture probes against 579 mRNAs were obtained from Nanostring Technologies Seattle, WA. Data were collected and analyzed using the nCounter Digital Analyzer.	The number of barcodes hybridized to specific RNA targets on cartridges were directly counted by the nCounter Digital Analyzer with 579 fields of view setting.	Nanostring RAW 16.xlsx, Nanostring RAW 21.xlsx		For nanostring data, raw counts were normalized to the positive spike-in controls and then log2 transformed. To reduce technical bias, genes with an expression level below the mean plus two standard deviations of the negative controls were filtered out. Quantile normalization was applied to the remaining transcripts (522 for glomeruli and 502 for TI). Linear mixed effect models were used to ident…	GPL21847	Samir,,Parikh	samir.parikh@osumc.edu	6142934997	Nephrology	Ohio State University	395 W 12th Avenu, -Address 2-	Columbus	OH	43210	USA	NONE	502	NA	NA	Healthy control	NA	NA	NA
Pre-implantation kidney donor control 9 [Avg_15YT]	GSM6030827	HC	Homo sapiens	ln class: Healthy control						total RNA	Formalin-fixed and paraffin-embedded (FFPE) kidney biopsy tissue was cut into 6-7 10渭m sections. After deparaffinization, all available glomeruli and TI were separated by laser microdissection (PALM MicroBeam, Zeiss Labs, Germany), captured and digested with proteinase K. From each biopsy, a median glomerular cross-sectional area of 1,250,000ü渭m2, corresponding to 40 glomerular cross-sections, an…	not provided	To ensure there was similar starting material for each sample for expression analysis, pre-amplification conditions were determined by GAPDH RT-PCR cycle number. Extracted RNA was submitted for expression analysis using the Nanostring nCounter庐 GX human Immunology Panel (Nanostring Technologies, Seattle, WA). The panel consists of 579 immune response genes, 6 positive controls, 6 negative control…	9606	Reporter and Capture probes against 579 mRNAs were obtained from Nanostring Technologies Seattle, WA. Data were collected and analyzed using the nCounter Digital Analyzer.	The number of barcodes hybridized to specific RNA targets on cartridges were directly counted by the nCounter Digital Analyzer with 579 fields of view setting.	Nanostring RAW 16.xlsx, Nanostring RAW 20.xlsx		For nanostring data, raw counts were normalized to the positive spike-in controls and then log2 transformed. To reduce technical bias, genes with an expression level below the mean plus two standard deviations of the negative controls were filtered out. Quantile normalization was applied to the remaining transcripts (522 for glomeruli and 502 for TI). Linear mixed effect models were used to ident…	GPL21847	Samir,,Parikh	samir.parikh@osumc.edu	6142934997	Nephrology	Ohio State University	395 W 12th Avenu, -Address 2-	Columbus	OH	43210	USA	NONE	502	NA	NA	Healthy control	NA	NA	NA
Pre-implantation kidney donor control 10 [Avg_16YT]	GSM6030828	HC	Homo sapiens	ln class: Healthy control						total RNA	Formalin-fixed and paraffin-embedded (FFPE) kidney biopsy tissue was cut into 6-7 10渭m sections. After deparaffinization, all available glomeruli and TI were separated by laser microdissection (PALM MicroBeam, Zeiss Labs, Germany), captured and digested with proteinase K. From each biopsy, a median glomerular cross-sectional area of 1,250,000ü渭m2, corresponding to 40 glomerular cross-sections, an…	not provided	To ensure there was similar starting material for each sample for expression analysis, pre-amplification conditions were determined by GAPDH RT-PCR cycle number. Extracted RNA was submitted for expression analysis using the Nanostring nCounter庐 GX human Immunology Panel (Nanostring Technologies, Seattle, WA). The panel consists of 579 immune response genes, 6 positive controls, 6 negative control…	9606	Reporter and Capture probes against 579 mRNAs were obtained from Nanostring Technologies Seattle, WA. Data were collected and analyzed using the nCounter Digital Analyzer.	The number of barcodes hybridized to specific RNA targets on cartridges were directly counted by the nCounter Digital Analyzer with 579 fields of view setting.	Nanostring RAW 14.xlsx, Nanostring RAW 17.xlsx		For nanostring data, raw counts were normalized to the positive spike-in controls and then log2 transformed. To reduce technical bias, genes with an expression level below the mean plus two standard deviations of the negative controls were filtered out. Quantile normalization was applied to the remaining transcripts (522 for glomeruli and 502 for TI). Linear mixed effect models were used to ident…	GPL21847	Samir,,Parikh	samir.parikh@osumc.edu	6142934997	Nephrology	Ohio State University	395 W 12th Avenu, -Address 2-	Columbus	OH	43210	USA	NONE	502	NA	NA	Healthy control	NA	NA	NA

## Sheet: seven DEGs selected
probe_id	log2FC	Mean.Expr	t	P.value	adj.P	B	DEG
EGR1	-2.00678	7.15882	7.68439	9.73e-12	4.84e-09	16.3915	down
MME	-1.84797	7.5139	7.52474	2.14e-11	5.32e-09	15.629	down
PTPRC_all	1.46132	3.50708	-6.91439	4.17e-10	6.91e-08	12.7573	up
RORC	-1.4682	5.37414	6.59516	1.91e-09	1.9e-07	11.2884	down
MX1	1.47126	6.45186	-5.31915	6.18e-07	3.41e-05	5.73011	up
ZBTB16	-2.53135	5.94212	4.87082	4.07e-06	0.00014452	3.92978	down
FKBP5	-1.16758	5.25067	3.69426	0.000356437	0.00361529	-0.28928	down
