# Supplementary material for: MME and PTPRC: key renal biomarkers in lupus nephritis
Source: PeerJ. 2024 Sep 16;12:e18070. doi: 10.7717/peerj.18070 (PMC11412223; doi:10.7717/peerj.18070)
Supplement: Supplemental Information 6 [file peerj-12-18070-s006.xls]

## Sheet: Sheet1
ITEM TO CHECK	IMPORTANCE	CHECKLIST
EXPERIMENTAL DESIGN
Definition of experimental and control groups	E	line 111
Number within each group	E	line 111
Assay carried out by core lab or investigator's lab?	D	core lab
Acknowledgement of authors' contributions	D	line 270
SAMPLE
Description	E	line 111
Volume/mass of sample processed	D	line 112
Microdissection or macrodissection	E	not applicable
Processing procedure	E	line 123
If frozen - how and how quickly?	E	Liquid nitrogen quick freezing
If fixed - with what, how quickly?	E	not applicable
Sample storage conditions and duration (especially for FFPE samples)	E	-80 degree
NUCLEIC ACID EXTRACTION
Procedure and/or instrumentation	E	line 123
Name of kit and details of any modifications	E	line 123
Source of additional reagents used	D	line 124
Details of DNase or RNAse treatment	E	yes
Contamination assessment (DNA or RNA)	E	line 124
Nucleic acid quantification	E	yes
Instrument and method	E	nono2000
Purity (A260/A280)	D	yes
Yield	D	yes
RNA integrity method/instrument	E	Min Wen
RIN/RQI or Cq of 3' and 5' transcripts	E	Min Wen
Electrophoresis traces	D	yes
Inhibition testing (Cq dilutions, spike or other)	E	yes
REVERSE TRANSCRIPTION
Complete reaction conditions	E	yes
Amount of RNA and reaction volume	E	20
Priming oligonucleotide (if using GSP) and concentration	E	no
Reverse transcriptase and concentration	E	yes
Temperature and time	E	Min Wen
Manufacturer of reagents and catalogue numbers	D	line 128
Cqs with and without RT	D*	yes
Storage conditions of cDNA	D	-20
qPCR TARGET INFORMATION
If multiplex, efficiency and LOD of each assay.	E	Min Wen
Sequence accession number	E	Min Wen
Location of amplicon	D	yes
Amplicon length	E	100~200bp
In silico specificity screen (BLAST, etc)	E	blast
Pseudogenes, retropseudogenes or other homologs?	D	no
Sequence alignment	D	not applicable
Secondary structure analysis of amplicon	D	not applicable
Location of each primer by exon or intron (if applicable)	E	exon
What splice variants are targeted?	E	not applicable
qPCR OLIGONUCLEOTIDES
Primer sequences	E	table 1
RTPrimerDB Identification Number	D	no
Probe sequences	D**	np
Location and identity of any modifications	E	no
Manufacturer of oligonucleotides	D	no
Purification method	D	Min Wen
qPCR PROTOCOL
Complete reaction conditions	E	yes
Reaction volume and amount of cDNA/DNA	E	20ul
Primer, (probe), Mg++ and dNTP concentrations	E	Min Wen
Polymerase identity and concentration	E	Min Wen
Buffer/kit identity and manufacturer	E	Min Wen
Exact chemical constitution of the buffer	D	Min Wen
Additives (SYBR Green I, DMSO, etc.)	E	SYBR
Manufacturer of plates/tubes and catalog number	D	100ul
Complete thermocycling parameters	E	yes
Reaction setup (manual/robotic)	D	robotic
Manufacturer of qPCR instrument	E	biored
qPCR VALIDATION
Evidence of optimisation (from gradients)	D	no
Specificity (gel, sequence, melt, or digest)	E	gel
For SYBR Green I, Cq of the NTC	E	35
Standard curves with slope and y-intercept	E	yes
PCR efficiency calculated from slope	E	yes
Confidence interval for PCR efficiency or standard error	D	yes
r2 of standard curve	E	no
Linear dynamic range	E	yes
Cq variation at lower limit	E	yes
Confidence intervals throughout range	D	yes
Evidence for limit of detection	E	yes
If multiplex, efficiency and LOD of each assay.	E	not applicable
DATA ANALYSIS
qPCR analysis program (source, version)	E	Manual calculation
Cq method determination	E	Manual calculation
Outlier identification and disposition	E	Manual calculation
Results of NTCs	E	36
Justification of number and choice of reference genes	E	GAPDH
Description of normalisation method	E	contrast with reference genes
Number and concordance of biological replicates	D	three
Number and stage (RT or qPCR) of technical replicates	E	three
Repeatability (intra-assay variation)	E	three
Reproducibility (inter-assay variation, %CV)	D	not applicable
Power analysis	D	prism
Statistical methods for result significance	E	t test
Software (source, version)	E	prism 10
Cq or raw data submission using RDML	D	no
Table 1. MIQE checklist for authors, reviewers and editors. All essential information (E) must be submitted with the manuscript. Desirable
information (D) should be submitted if available. If using primers obtained from RTPrimerDB, information on qPCR target, oligonucleotides,
protocols and validation is available from that source.
*: Assessing the absence of DNA using a no RT assay is essential when first extracting RNA. Once the sample has been validated as
RDNA-free, inclusion of a no-RT control is desirable, but no longer essential.
**: Disclosure of the probe sequence is highly desirable and strongly encouraged. However, since not all commercial pre-designed assay
vendors provide this information, it cannot be an essential requirement. Use of such assays is advised against.
