# Supplementary material for: MME and PTPRC: key renal biomarkers in lupus nephritis
Source: PeerJ. 2024 Sep 16;12:e18070. doi: 10.7717/peerj.18070 (PMC11412223; doi:10.7717/peerj.18070)
Supplement: Supplemental Information 8 [file peerj-12-18070-s008.xlsx]

## Sheet: UACR
C57BL/6	MRL/lpr
0.72383	2.87659
0.563134	2.40012
0.643716	1.02601

## Sheet: dS-DNA
C57BL/6	MRL/lpr
1.86308	172.122
2.74071	103.133
4.68674	119.693
