# Supplementary material for: MME and PTPRC: key renal biomarkers in lupus nephritis
Source: PeerJ. 2024 Sep 16;12:e18070. doi: 10.7717/peerj.18070 (PMC11412223; doi:10.7717/peerj.18070)
Supplement: Supplemental Information 9 [file peerj-12-18070-s009.xlsx]

## Sheet: analysis dup3
Sample Name	ACTB	EGF1	FKBP5	MME	MX1	PRPT	RORC	ZBTB16
C57-31	18.0533	26.5833	24.55	21.6333	30.8567	26.13	24.3033	26.2467
C57-33	20.35	27.86	27.6767	23.1467	31.2267	26.5467	27.4033	27.8233
C57-A32	18.2833	25.66	24.4	21.66	30.6233	26.4267	24.4167	27.13
C57-A62	17.09	23.9067	21.6867	20.3933	28.05	24.3967	23.2333	25.24
C57-A99	18.67	24.7467	25.6067	22.3667	30.55	25.7533	24.8067	27.5067
SLE-21	19.9967	27.88	23.6067	24.9933	31.6567	24.3967	27.3567	26.16
SLE-22	19.5633	23.5433	25.8833	24.23	31.77	25.2333	28.0133	29.3833
SLE-26	20.2533	28.26	24.4067	24.8933	31.72	24.6833	27.9433	27.5033
SLE-27	22.9133	30.7	28.0733	25.6467	36.3633	30.2833	29.73	31.8967
SLE-39	18.9767	26.5567	25.6033	23.42	31.2067	23.98	26.3233	28.4033
													Sample Name	ACTB	EGF1	Δct	ΔΔct	2^(-ΔΔct)
												7.262	C57-31	18.0533	26.5833	8.53	8.53	0.00270529
													C57-33	20.35	27.86	7.51	7.51	0.00548611
													C57-A32	18.2833	25.66	7.37667	7.37667	0.00601731
													C57-A62	17.09	23.9067	6.81667	6.81667	0.00887113
													C57-A99	18.67	24.7467	6.07667	6.07667	0.0148163
													SLE-21	19.9967	27.88	7.88333	7.88333	0.00423526
													SLE-22	19.5633	23.5433	3.98	3.98	0.0633725
													SLE-26	20.2533	28.26	8.00667	8.00667	0.00388824
													SLE-27	22.9133	30.7	7.78667	7.78667	0.00452876
													SLE-39	18.9767	26.5567	7.58	7.58	0.00522628
													Sample Name	ACTB	FKBP5	#VALUE!		1
												6.29467	C57-31	18.0533	24.55	6.49667	6.49667	0.0110741
													C57-33	20.35	27.6767	7.32667	7.32667	0.00622951
													C57-A32	18.2833	24.4	6.11667	6.11667	0.0144112
													C57-A62	17.09	21.6867	4.59667	4.59667	0.04133
													C57-A99	18.67	25.6067	6.93667	6.93667	0.0081631
													SLE-21	19.9967	23.6067	3.61	3.61	0.0818996
													SLE-22	19.5633	25.8833	6.32	6.32	0.0125167
													SLE-26	20.2533	24.4067	4.15333	4.15333	0.0561982
													SLE-27	22.9133	28.0733	5.16	5.16	0.0279695
													SLE-39	18.9767	25.6033	6.62667	6.62667	0.0101199
													Sample Name	ACTB	MME	#VALUE!		1
												3.35067	C57-31	18.0533	21.6333	3.58	3.58	0.0836205
													C57-33	20.35	23.1467	2.79667	2.79667	0.143919
													C57-A32	18.2833	21.66	3.37667	3.37667	0.0962769
													C57-A62	17.09	20.3933	3.30333	3.30333	0.101297
													C57-A99	18.67	22.3667	3.69667	3.69667	0.0771245
													SLE-21	19.9967	24.9933	4.99667	4.99667	0.0313223
													SLE-22	19.5633	24.23	4.66667	4.66667	0.0393725
													SLE-26	20.2533	24.8933	4.64	4.64	0.0401071
													SLE-27	22.9133	25.6467	2.73333	2.73333	0.150378
													SLE-39	18.9767	23.42	4.44333	4.44333	0.0459646
													Sample Name	ACTB	MX1	#VALUE!		1
												11.772	C57-31	18.0533	30.8567	12.8033	12.8033	0.000139898
													C57-33	20.35	31.2267	10.8767	10.8767	0.00053186
													C57-A32	18.2833	30.6233	12.34	12.34	0.000192881
													C57-A62	17.09	28.05	10.96	10.96	0.000502009
													C57-A99	18.67	30.55	11.88	11.88	0.000265316
													SLE-21	19.9967	31.6567	11.66	11.66	0.000309023
													SLE-22	19.5633	31.77	12.2067	12.2067	0.000211557
													SLE-26	20.2533	31.72	11.4667	11.4667	0.000353337
													SLE-27	22.9133	36.3633	13.45	13.45	8.93607e-05
													SLE-39	18.9767	31.2067	12.23	12.23	0.000208163
													Sample Name	ACTB	PRPT	#VALUE!		1
												7.36133	C57-31	18.0533	26.13	8.07667	8.07667	0.00370409
													C57-33	20.35	26.5467	6.19667	6.19667	0.0136338
													C57-A32	18.2833	26.4267	8.14333	8.14333	0.00353682
													C57-A62	17.09	24.3967	7.30667	7.30667	0.00631647
													C57-A99	18.67	25.7533	7.08333	7.08333	0.00737402
													SLE-21	19.9967	24.3967	4.4	4.4	0.0473661
													SLE-22	19.5633	25.2333	5.67	5.67	0.0196408
													SLE-26	20.2533	24.6833	4.43	4.43	0.0463914
													SLE-27	22.9133	30.2833	7.37	7.37	0.00604518
													SLE-39	18.9767	23.98	5.00333	5.00333	0.0311779
													Sample Name	ACTB	RORC	#VALUE!		1
												6.34333	C57-31	18.0533	24.3033	6.25	6.25	0.013139
													C57-33	20.35	27.4033	7.05333	7.05333	0.00752896
													C57-A32	18.2833	24.4167	6.13333	6.13333	0.0142457
													C57-A62	17.09	23.2333	6.14333	6.14333	0.0141473
													C57-A99	18.67	24.8067	6.13667	6.13667	0.0142128
													SLE-21	19.9967	27.3567	7.36	7.36	0.00608722
													SLE-22	19.5633	28.0133	8.45	8.45	0.00285954
													SLE-26	20.2533	27.9433	7.69	7.69	0.00484261
													SLE-27	22.9133	29.73	6.81667	6.81667	0.00887113
													SLE-39	18.9767	26.3233	7.34667	7.34667	0.00614374
													Sample Name	ACTB	ZBTB16	#VALUE!		1
												8.3	C57-31	18.0533	26.2467	8.19333	8.19333	0.00341634
													C57-33	20.35	27.8233	7.47333	7.47333	0.00562733
													C57-A32	18.2833	27.13	8.84667	8.84667	0.00217214
													C57-A62	17.09	25.24	8.15	8.15	0.00352051
													C57-A99	18.67	27.5067	8.83667	8.83667	0.00218725
													SLE-21	19.9967	26.16	6.16333	6.16333	0.0139525
													SLE-22	19.5633	29.3833	9.82	9.82	0.00110633
													SLE-26	20.2533	27.5033	7.25	7.25	0.0065695
													SLE-27	22.9133	31.8967	8.98333	8.98333	0.00197582
													SLE-39	18.9767	28.4033	9.42667	9.42667	0.00145308

## Sheet: analysis dup2
Sample Name	gene Name	Cq
A99	GAPDH	28.69
A99	GAPDH	28.41
A99	GAPDH	27.7
A99	MME	21.93
A99	MME	21.89
A99	MME	22.01
A99	RORC	24.42
A99	RORC	24.7
A99	RORC	24.82
A99	ZBTB16	27.16
A99	ZBTB16	27.33
A99	ZBTB16	27.23
32	GAPDH	27.97
32	GAPDH	27.97
32	GAPDH	28.6
32	MME	20.53
32	MME	20.06
32	MME	20.49
32	RORC	22.92																						GAPDH	∆ct	∆∆ct	2^(-∆∆ct)
32	RORC	22.9																			FKBP5	21	24.1933	28.99	-4.79667	-1.81667	3.52266
32	RORC	23.41																				24	25.71	28.4867	-2.77667	0.203333	0.868541
32	ZBTB16	25.45																				26	23.8133	28.8367	-5.02333	-2.04333	4.12197
32	ZBTB16	25.73																				27	28.0067	28.62	-0.613333	2.36667	0.193893
32	ZBTB16	26.23																				31	25.03	28.4667	-3.43667	-0.456667	1.37237
31	GAPDH	28.37																				32	23.2667	28.18	-4.91333	-1.93333	3.81937
31	GAPDH	28.48																				33	27.6867	28.2533	-0.566667	2.41333	0.187722
31	GAPDH	28.55																				A99	25.2633	28.2667	-3.00333	-0.0233333	1.0163
31	MME	22.23																			MME	21	24.4767	28.99	-4.51333	1.85827	0.275807
31	MME	22.22										Sample Name	FKBP5	GAPDH	MME	MX1	RORC	ZBTB16	total			24	21.8533	28.4867	-6.63333	-0.261733	1.19892
31	MME	22.15										21	24.1933	28.99	24.4767	31.8567	27.5	26.3567	27.2289			26	24.42	28.8367	-4.41667	1.95493	0.257933
31	RORC	25.49										24	25.71	28.4867	21.8533	31.0033	26.0467	28.86	26.9933			27	25.2167	28.62	-3.40333	2.96827	0.12778
31	RORC	25.32										26	23.8133	28.8367	24.42	30.95	27.5067	27.2	27.1211			31	22.2	28.4667	-6.26667	0.104933	0.929848
31	RORC	25.35										27	28.0067	28.62	25.2167	33.5533	28.6933	30.11	29.0333			32	20.36	28.18	-7.82	-1.4484	2.72905
31	ZBTB16	27.2										31	25.03	28.4667	22.2	31.4633	25.3867	27.1733	26.62			33	23.1767	28.2533	-5.07667	1.29493	0.407555
31	ZBTB16	27.2										32	23.2667	28.18	20.36	29.1733	23.0767	25.8033	24.9767			A99	21.9433	28.2667	-6.32333	0.0482667	0.967098
31	ZBTB16	27.12										33	27.6867	28.2533	23.1767	31.3567	27.8433	29.66	27.9961		MX1	21	31.8567	28.99	2.86667	0.486667	0.713672
33	GAPDH	27.97										A99	25.2633	28.2667	21.9433	30.6933	24.6467	27.24	26.3422			24	31.0033	28.4867	2.51667	0.136667	0.909618
33	GAPDH	29.28										total	25.3712	28.5125	22.9558	31.2563	26.3375	27.8004	27.039			26	30.95	28.8367	2.11333	-0.266667	1.20303
33	GAPDH	27.51																				27	33.5533	28.62	4.93333	2.55333	0.170361
33	MME	23.78																				31	31.4633	28.4667	2.99667	0.616667	0.652176
33	MME	23.08																				32	29.1733	28.18	0.993333	-1.38667	2.61474
33	MME	22.67																				33	31.3567	28.2533	3.10333	0.723333	0.605696
33	RORC	27.97																				A99	30.6933	28.2667	2.42667	0.0466667	0.968171
33	RORC	27.87																			RORC	21	27.5	28.99	-1.49	1.5633	0.338376
33	RORC	27.69																				24	26.0467	28.4867	-2.44	0.6133	0.6537
33	ZBTB16	29.78																				26	27.5067	28.8367	-1.33	1.7233	0.302855
33	ZBTB16	29.63																				27	28.6933	28.62	0.0733333	3.12663	0.114496
33	ZBTB16	29.57																				31	25.3867	28.4667	-3.08	-0.0267	1.01868
26	GAPDH	29.46																				32	23.0767	28.18	-5.10333	-2.05003	4.14116
26	GAPDH	28.48																				33	27.8433	28.2533	-0.41	2.6433	0.160062
26	GAPDH	28.57																				A99	24.6467	28.2667	-3.62	-0.5667	1.48113
26	MME	24.27																			ZBTB16	21	26.3567	28.99	-2.63333	-1.81083	3.50845
26	MME	24.43																				24	28.86	28.4867	0.373333	1.19583	0.436534
26	MME	24.56																				26	27.2	28.8367	-1.63667	-0.814167	1.75828
26	RORC	27.42																				27	30.11	28.62	1.49	2.3125	0.201311
26	RORC	27.53																				31	27.1733	28.4667	-1.29333	-0.470833	1.38591
26	RORC	27.57																				32	25.8033	28.18	-2.37667	-1.55417	2.93664
26	ZBTB16	27.25																				33	29.66	28.2533	1.40667	2.22917	0.213282
26	ZBTB16	27.27																				A99	27.24	28.2667	-1.02667	-0.204167	1.15202
26	ZBTB16	27.08
21	GAPDH	28.98
21	GAPDH	29.04
21	GAPDH	28.95
21	MME	25.07
21	MME	23.65
21	MME	24.71
21	RORC	26.82
21	RORC	27.72
21	RORC	27.96
21	ZBTB16	25.96
21	ZBTB16	26.19
21	ZBTB16	26.92
27	GAPDH	28.29
27	GAPDH	28.17
27	GAPDH	29.4
27	MME	25.02
27	MME	25.13
27	MME	25.5
27	RORC	28.3
27	RORC	29.8
27	RORC	27.98
27	ZBTB16	30.28
27	ZBTB16	29.39
27	ZBTB16	30.66
24	GAPDH	29.33
24	GAPDH	28.03
24	GAPDH	28.1
24	MME	21.87
24	MME	21.8
24	MME	21.89
24	RORC	25.91
24	RORC	26.2
24	RORC	26.03
24	ZBTB16	28.81
24	ZBTB16	28.86
24	ZBTB16	28.91
A99	FKBP5	25.21
A99	FKBP5	25.24
A99	FKBP5	25.34
A99	MX1	30.79
A99	MX1	30.93
A99	MX1	30.36
32	FKBP5	23.11
32	FKBP5	23.08
32	FKBP5	23.61
32	MX1	29.01
32	MX1	29.1
32	MX1	29.41
31	FKBP5	25.01
31	FKBP5	25.02
31	FKBP5	25.06
31	MX1	31.59
31	MX1	31.43
31	MX1	31.37
33	FKBP5	28.19
33	FKBP5	27.53
33	FKBP5	27.34
33	MX1	30.9
33	MX1	31.79
33	MX1	31.38
26	FKBP5	23.99
26	FKBP5	23.69
26	FKBP5	23.76
26	MX1	30.98
26	MX1	30.99
26	MX1	30.88
21	FKBP5	24.22
21	FKBP5	24.24
21	FKBP5	24.12
21	MX1	31.9
21	MX1	31.75
21	MX1	31.92
27	FKBP5	27.96
27	FKBP5	28.01
27	FKBP5	28.05
27	MX1	34.28
27	MX1	33.09
27	MX1	33.29
24	FKBP5	25.71
24	FKBP5	25.56
24	FKBP5	25.86
24	MX1	30.39
24	MX1	31.87
24	MX1	30.75

## Sheet: analysis dup1
Sample Name	Gene Name	Cq
A99	GAPDH	29.58
A99	GAPDH	29.42
A99	GAPDH	29.36
A99	EGR1	21.82
A99	EGR1	21.9
A99	EGR1	21.95
A99	prpt1	23.72
A99	prpt1	23.74
A99	prpt1	23.8
32	GAPDH	31.78
32	GAPDH	30.95
32	GAPDH	31.65
32	EGR1	22.63
32	EGR1	22.72
32	EGR1	23.63
32	prpt1	23.93
32	prpt1	22.92
32	prpt1	22.94
31	GAPDH	29.66			Sample Name	EGR1	GAPDH	prpt1	total			Sample Name	GAPDH		∆ct	∆∆ct	2^(-∆∆ct)
31	GAPDH	30.63			21	24.1333	32.0967	23.9867	26.7389		EGR1	21	32.0967	24.1333	-7.96333	-0.566666	1.4811
31	GAPDH	30.47			24	19.0467	32.9467	22.02	24.6711			24	32.9467	19.0467	-13.9	-6.50333	90.719
31	EGR1	23.06			26	23.9567	32.8933	21.75	26.2			26	32.8933	23.9567	-8.93667	-1.54	2.90794
31	EGR1	23.25			27	23.2067	32.9233	21.26	25.7967			27	32.9233	23.2067	-9.71667	-2.32	4.99332
31	EGR1	23.31			31	23.2067	30.2533	24.3	25.92			31	30.2533	23.2067	-7.04667	0.35	0.784584
31	prpt1	24.33			32	22.9933	31.46	23.2633	25.9056
31	prpt1	24.18			33	21.9967	29.5767	23.8833	25.1522			33	29.5767	21.9967	-7.58	-0.183333	1.1355
31	prpt1	24.39			A99	21.89	29.4533	23.7533	25.0322			A99	29.4533	21.89	-7.56333	-0.166666	1.12246
33	GAPDH	29.72									prpt1	21	32.0967	23.9867	-8.11	-2.32778	5.02032
33	GAPDH	30.21										24	32.9467	22.02	-10.9267	-5.14445	35.3698
33	GAPDH	28.8										26	32.8933	21.75	-11.1433	-5.36111	41.1013
33	EGR1	22.16										27	32.9233	21.26	-11.6633	-5.88111	58.9375
33	EGR1	21.78										31	30.2533	24.3	-5.95333	-0.171113	1.12593
33	EGR1	22.05										32	31.46	23.2633		5.78222	0.018171
33	prpt1	24.17										33	29.5767	23.8833	-5.69333	0.0888867	0.940248
33	prpt1	23.68										A99	29.4533	23.7533	-5.7	0.08222	0.944603
33	prpt1	23.8
26	GAPDH	33.15
26	GAPDH	32.55
26	GAPDH	32.98
26	EGR1	23.9
26	EGR1	24.18
26	EGR1	23.79
26	prpt1	21.82
26	prpt1	21.7
26	prpt1	21.73
21	GAPDH	32.18
21	GAPDH	32.54
21	GAPDH	31.57
21	EGR1	24.18
21	EGR1	24.12
21	EGR1	24.1
21	prpt1	23.69
21	prpt1	24.75
21	prpt1	23.52
27	GAPDH	33.01
27	GAPDH	32.82
27	GAPDH	32.94
27	EGR1	23.29
27	EGR1	23.16
27	EGR1	23.17
27	prpt1	21.32
27	prpt1	21.14
27	prpt1	21.32
24	GAPDH	32.68
24	GAPDH	33.3
24	GAPDH	32.86
24	EGR1	19.11
24	EGR1	18.98
24	EGR1	19.05
24	prpt1	22.01
24	prpt1	21.95
24	prpt1	22.1

## Sheet: dup3
Sample Name	Gene Name	Cq
SLE-27	FKBP5	28.05
SLE-27	FKBP5	28
SLE-27	FKBP5	28.17
SLE-21	FKBP5	23.55
SLE-21	FKBP5	23.45
SLE-21	FKBP5	23.82
SLE-26	FKBP5	24.36
SLE-26	FKBP5	24.44
SLE-26	FKBP5	24.42
N	FKBP5	-
SLE-27	ZBTB16	31.63
SLE-27	ZBTB16	31.67
SLE-27	ZBTB16	32.39
SLE-21	ZBTB16	26.11
SLE-21	ZBTB16	26.01
SLE-21	ZBTB16	26.36
SLE-26	ZBTB16	27.49
SLE-26	ZBTB16	27.48
SLE-26	ZBTB16	27.54
N	ZBTB16	35.17
SLE-27	RORC	29.99
SLE-27	RORC	29.84
SLE-27	RORC	29.36
SLE-21	RORC	27.39
SLE-21	RORC	27.51
SLE-21	RORC	27.17
SLE-26	RORC	27.92
SLE-26	RORC	27.96
SLE-26	RORC	27.95
N	RORC	-
SLE-27	MME	25.52
SLE-27	MME	25.95
SLE-27	MME	25.47
SLE-21	MME	25.24
SLE-21	MME	24.92
SLE-21	MME	24.82
SLE-26	MME	24.91
SLE-26	MME	24.9
SLE-26	MME	24.87
N	MME	35.81
SLE-27	PRPT	30.16
SLE-27	PRPT	30.5
SLE-27	PRPT	30.19
SLE-21	PRPT	24.44
SLE-21	PRPT	24.33
SLE-21	PRPT	24.42
SLE-26	PRPT	24.77
SLE-26	PRPT	24.64
SLE-26	PRPT	24.64
N	PRPT	34.29
SLE-27	MX1	35.78
SLE-27	MX1	37.31
SLE-27	MX1	36
SLE-21	MX1	31.58
SLE-21	MX1	31.37
SLE-21	MX1	32.02
SLE-26	MX1	32.16
SLE-26	MX1	31.65
SLE-26	MX1	31.35
N	MX1	-
SLE-27	EGF1	30.69
SLE-27	EGF1	31.04
SLE-27	EGF1	30.37
SLE-21	EGF1	27.87
SLE-21	EGF1	27.78
SLE-21	EGF1	27.99
SLE-26	EGF1	28.37
SLE-26	EGF1	28.25
SLE-26	EGF1	28.16
N	EGF1	-
SLE-27	ACTB	23.01
SLE-27	ACTB	22.91
SLE-27	ACTB	22.82
SLE-21	ACTB	20.02
SLE-21	ACTB	20.01
SLE-21	ACTB	19.96
SLE-26	ACTB	20.32
SLE-26	ACTB	20.19
SLE-26	ACTB	20.25
N	ACTB	35.15
SLE-39	FKBP5	25.57
SLE-39	FKBP5	25.59
SLE-39	FKBP5	25.65
SLE-22	FKBP5	25.91
SLE-22	FKBP5	25.85
SLE-22	FKBP5	25.89
C57-A99	FKBP5	25.58
C57-A99	FKBP5	25.68
C57-A99	FKBP5	25.56
C57-A32	FKBP5	24.36
C57-A32	FKBP5	24.36
C57-A32	FKBP5	24.48
SLE-39	ZBTB16	28.27
SLE-39	ZBTB16	28.49
SLE-39	ZBTB16	28.45
SLE-22	ZBTB16	29.36
SLE-22	ZBTB16	29.42
SLE-22	ZBTB16	29.37
C57-A99	ZBTB16	27.37
C57-A99	ZBTB16	27.56
C57-A99	ZBTB16	27.59
C57-A32	ZBTB16	27.03
C57-A32	ZBTB16	27.14
C57-A32	ZBTB16	27.22
SLE-39	RORC	26.26
SLE-39	RORC	26.23
SLE-39	RORC	26.48
SLE-22	RORC	28.07
SLE-22	RORC	28.06
SLE-22	RORC	27.91
C57-A99	RORC	24.75
C57-A99	RORC	24.86
C57-A99	RORC	24.81
C57-A32	RORC	24.46
C57-A32	RORC	24.4
C57-A32	RORC	24.39
SLE-39	MME	23.24
SLE-39	MME	23.66
SLE-39	MME	23.36
SLE-22	MME	24.44
SLE-22	MME	24.07
SLE-22	MME	24.18
C57-A99	MME	22.35
C57-A99	MME	22.31
C57-A99	MME	22.44
C57-A32	MME	21.71
C57-A32	MME	21.62
C57-A32	MME	21.65
SLE-39	PRPT	23.98
SLE-39	PRPT	23.99
SLE-39	PRPT	23.97
SLE-22	PRPT	25.26
SLE-22	PRPT	25.23
SLE-22	PRPT	25.21
C57-A99	PRPT	25.73
C57-A99	PRPT	25.89
C57-A99	PRPT	25.64
C57-A32	PRPT	26.36
C57-A32	PRPT	26.36
C57-A32	PRPT	26.56
SLE-39	MX1	31.04
SLE-39	MX1	31.24
SLE-39	MX1	31.34
SLE-22	MX1	31.95
SLE-22	MX1	31.66
SLE-22	MX1	31.7
C57-A99	MX1	30.65
C57-A99	MX1	30.38
C57-A99	MX1	30.62
C57-A32	MX1	30.83
C57-A32	MX1	30.59
C57-A32	MX1	30.45
SLE-39	EGF1	26.47
SLE-39	EGF1	26.67
SLE-39	EGF1	26.53
SLE-22	EGF1	23.6
SLE-22	EGF1	23.49
SLE-22	EGF1	23.54
C57-A99	EGF1	24.9
C57-A99	EGF1	24.59
C57-A99	EGF1	24.75
C57-A32	EGF1	25.65
C57-A32	EGF1	25.64
C57-A32	EGF1	25.69
SLE-39	ACTB	18.99
SLE-39	ACTB	18.98
SLE-39	ACTB	18.96
SLE-22	ACTB	19.44
SLE-22	ACTB	19.59
SLE-22	ACTB	19.66
C57-A99	ACTB	18.74
C57-A99	ACTB	18.68
C57-A99	ACTB	18.59
C57-A32	ACTB	18.38
C57-A32	ACTB	18.27
C57-A32	ACTB	18.2
C57-33	FKBP5	27.5
C57-33	FKBP5	27.67
C57-33	FKBP5	27.86
C57-31	FKBP5	24.57
C57-31	FKBP5	24.56
C57-31	FKBP5	24.52
C57-A62\	FKBP5	21.71
C57-A62\	FKBP5	21.68
C57-A62\	FKBP5	21.67
N	FKBP5	34.53
C57-33	ZBTB16	27.8
C57-33	ZBTB16	27.84
C57-33	ZBTB16	27.83
C57-31	ZBTB16	26.3
C57-31	ZBTB16	26.01
C57-31	ZBTB16	26.43
C57-A62\	ZBTB16	25.28
C57-A62\	ZBTB16	25.03
C57-A62\	ZBTB16	25.41
N	ZBTB16	27.94
C57-33	RORC	27.31
C57-33	RORC	27.49
C57-33	RORC	27.41
C57-31	RORC	24.28
C57-31	RORC	24.33
C57-31	RORC	24.3
C57-A62\	RORC	23.3
C57-A62\	RORC	23.19
C57-A62\	RORC	23.21
N	RORC	31.19
C57-33	MME	22.95
C57-33	MME	23.54
C57-33	MME	22.95
C57-31	MME	21.84
C57-31	MME	21.44
C57-31	MME	21.62
C57-A62\	MME	20.41
C57-A62\	MME	20.39
C57-A62\	MME	20.38
N	MME	25.61
C57-33	PRPT	26.51
C57-33	PRPT	26.54
C57-33	PRPT	26.59
C57-31	PRPT	26.16
C57-31	PRPT	26.08
C57-31	PRPT	26.15
C57-A62\	PRPT	24.45
C57-A62\	PRPT	24.32
C57-A62\	PRPT	24.42
N	PRPT	33.21
C57-33	MX1	30.82
C57-33	MX1	31.51
C57-33	MX1	31.35
C57-31	MX1	31.03
C57-31	MX1	30.87
C57-31	MX1	30.67
C57-A62\	MX1	28.04
C57-A62\	MX1	28.13
C57-A62\	MX1	27.98
N	MX1	32.96
C57-33	EGF1	27.74
C57-33	EGF1	28
C57-33	EGF1	27.84
C57-31	EGF1	26.48
C57-31	EGF1	26.57
C57-31	EGF1	26.7
C57-A62\	EGF1	24.12
C57-A62\	EGF1	23.76
C57-A62\	EGF1	23.84
N	EGF1	31.54
C57-33	ACTB	20.42
C57-33	ACTB	20.31
C57-33	ACTB	20.32
C57-31	ACTB	18.06
C57-31	ACTB	18.04
C57-31	ACTB	18.06
C57-A62\	ACTB	17.12
C57-A62\	ACTB	17.14
C57-A62\	ACTB	17.01
N	ACTB	31.05

## Sheet: dup2-2
color	Position	Sample Name	Gene Name	Cq	Concentration	Call	Excluded	Sample Type	Standard	Cq Mean	Cq Error	Concentration Mean	Concentration Error	Replicate Group	Dye	Edited Call	Slope	EPF	Failure	Notes	Sample Prep Notes	Number
255;132;197;238	A1	1	None	-	-	Negative	Unchecked	Unknown	-	-	-	-	-	A1	SYBR Green I		0.07	0.58	Replicate group contains positives and negatives.			1
255;132;197;238	A2	1	None	-	-	Negative	Unchecked	Unknown	-	-	-	-	-	A1	SYBR Green I		0.16	1.26	Replicate group contains positives and negatives.			2
255;132;197;238	A3	1	None	-	-	Negative	Unchecked	Unknown	-	-	-	-	-	A1	SYBR Green I		0.03	0.36	Replicate group contains positives and negatives.			3
255;132;197;238	A4	1	None	25.21	-	Positive	Unchecked	Unknown	-	27.98	2.98	-	-	A1	SYBR Green I		1.2	4.17	Replicate group contains positives and negatives.			4
255;132;197;238	A5	1	None	25.24	-	Positive	Unchecked	Unknown	-	27.98	2.98	-	-	A1	SYBR Green I		1.38	4.5	Replicate group contains positives and negatives.			5
255;132;197;238	A6	1	None	25.34	-	Positive	Unchecked	Unknown	-	27.98	2.98	-	-	A1	SYBR Green I		1.11	3.99	Replicate group contains positives and negatives.			6
255;132;197;238	A7	1	None	30.79	-	Positive	Unchecked	Unknown	-	27.98	2.98	-	-	A1	SYBR Green I		0.98	3.56	Replicate group contains positives and negatives.			7
255;132;197;238	A8	1	None	30.93	-	Positive	Unchecked	Unknown	-	27.98	2.98	-	-	A1	SYBR Green I		0.79	3.15	Replicate group contains positives and negatives.			8
255;132;197;238	A9	1	None	30.36	-	Positive	Unchecked	Unknown	-	27.98	2.98	-	-	A1	SYBR Green I		1.19	4.05	Replicate group contains positives and negatives.			9
255;132;197;238	A10	1	None	-	-	Negative	Unchecked	Unknown	-	-	-	-	-	A1	SYBR Green I		0.03	0.3	Replicate group contains positives and negatives.			10
255;132;197;238	A11	1	None	-	-	Negative	Unchecked	Unknown	-	-	-	-	-	A1	SYBR Green I		0.03	0.11	Replicate group contains positives and negatives.			11
255;132;197;238	A12	1	None	-	-	Negative	Unchecked	Unknown	-	-	-	-	-	A1	SYBR Green I		0.04	0.39	Replicate group contains positives and negatives.			12
255;132;197;238	B1	gapdh	None	-	-	Negative	Unchecked	Negative control	-	-	-	-	-	B1	SYBR Green I		0.08	0.79	Replicate group contains positives and negatives.			13
255;132;197;238	B2	gapdh	None	-	-	Negative	Unchecked	Negative control	-	-	-	-	-	B1	SYBR Green I		0.03	0.3	Replicate group contains positives and negatives.			14
255;132;197;238	B3	gapdh	None	-	-	Negative	Unchecked	Negative control	-	-	-	-	-	B1	SYBR Green I		0.12	1.06	Replicate group contains positives and negatives.			15
255;132;197;238	B4	gapdh	None	23.11	-	Positive	Unchecked	Negative control	-	25.33	1.92	-	-	B1	SYBR Green I		1.43	4.66	Neg Ctrl is positive, Replicate group contains positives and negatives.			16
255;132;197;238	B5	gapdh	None	23.08	-	Positive	Unchecked	Negative control	-	25.33	1.92	-	-	B1	SYBR Green I		1.78	5.17	Neg Ctrl is positive, Replicate group contains positives and negatives.			17
255;132;197;238	B6	gapdh	None	23.61	-	Positive	Unchecked	Negative control	-	25.33	1.92	-	-	B1	SYBR Green I		0.86	3.44	Neg Ctrl is positive, Replicate group contains positives and negatives.			18
255;132;197;238	B7	PTTR2-1	None	29.01	-	Positive	Unchecked	Unknown	-	31.39	1.36	-	-	B7	SYBR Green I		1.27	4.37	Replicate group contains positives and negatives.			19
255;132;197;238	B8	PTTR2-1	None	29.1	-	Positive	Unchecked	Unknown	-	31.39	1.36	-	-	B7	SYBR Green I		1.3	4.37	Replicate group contains positives and negatives.			20
255;132;197;238	B9	PTTR2-1	None	29.41	-	Positive	Unchecked	Unknown	-	31.39	1.36	-	-	B7	SYBR Green I		0.67	2.95	Replicate group contains positives and negatives.			21
255;132;197;238	B10	PTTR2-1	None	-	-	Negative	Unchecked	Unknown	-	-	-	-	-	B7	SYBR Green I		0.09	0.87	Replicate group contains positives and negatives.			22
255;132;197;238	B11	PTTR2-1	None	-	-	Negative	Unchecked	Unknown	-	-	-	-	-	B7	SYBR Green I		0.16	0.7	Replicate group contains positives and negatives.			23
255;132;197;238	B12	PTTR2-1	None	-	-	Negative	Unchecked	Unknown	-	-	-	-	-	B7	SYBR Green I		0.04	0.38	Replicate group contains positives and negatives.			24
255;132;197;238	C1	gapdh	None	-	-	Negative	Unchecked	Negative control	-	-	-	-	-	B1	SYBR Green I		0.08	0.65	Replicate group contains positives and negatives.			25
255;132;197;238	C2	gapdh	None	-	-	Negative	Unchecked	Negative control	-	-	-	-	-	B1	SYBR Green I		0.08	0.88	Replicate group contains positives and negatives.			26
255;132;197;238	C3	gapdh	None	-	-	Negative	Unchecked	Negative control	-	-	-	-	-	B1	SYBR Green I		0.09	0.8	Replicate group contains positives and negatives.			27
255;132;197;238	C4	gapdh	None	25.01	-	Positive	Unchecked	Negative control	-	25.33	1.92	-	-	B1	SYBR Green I		1.77	5.09	Neg Ctrl is positive, Replicate group contains positives and negatives.			28
255;132;197;238	C5	gapdh	None	25.02	-	Positive	Unchecked	Negative control	-	25.33	1.92	-	-	B1	SYBR Green I		1.81	5.13	Neg Ctrl is positive, Replicate group contains positives and negatives.			29
255;132;197;238	C6	gapdh	None	25.06	-	Positive	Unchecked	Negative control	-	25.33	1.92	-	-	B1	SYBR Green I		1.94	5.29	Neg Ctrl is positive, Replicate group contains positives and negatives.			30
255;132;197;238	C7	PTTR2-1	None	31.59	-	Positive	Unchecked	Unknown	-	31.39	1.36	-	-	B7	SYBR Green I		1.11	3.8	Replicate group contains positives and negatives.			31
255;132;197;238	C8	PTTR2-1	None	31.43	-	Positive	Unchecked	Unknown	-	31.39	1.36	-	-	B7	SYBR Green I		1.46	4.35	Replicate group contains positives and negatives.			32
255;132;197;238	C9	PTTR2-1	None	31.37	-	Positive	Unchecked	Unknown	-	31.39	1.36	-	-	B7	SYBR Green I		1.26	4.09	Replicate group contains positives and negatives.			33
255;132;197;238	C10	PTTR2-1	None	-	-	Negative	Unchecked	Unknown	-	-	-	-	-	B7	SYBR Green I		0.02	0.2	Replicate group contains positives and negatives.			34
255;132;197;238	C11	PTTR2-1	None	-	-	Negative	Unchecked	Unknown	-	-	-	-	-	B7	SYBR Green I		0.03	0.32	Replicate group contains positives and negatives.			35
255;132;197;238	C12	PTTR2-1	None	-	-	Negative	Unchecked	Unknown	-	-	-	-	-	B7	SYBR Green I		0.05	0.36	Replicate group contains positives and negatives.			36
255;132;197;238	D1	gapdh	None	-	-	Negative	Unchecked	Negative control	-	-	-	-	-	B1	SYBR Green I		0.06	0.55	Replicate group contains positives and negatives.			37
255;132;197;238	D2	gapdh	None	-	-	Negative	Unchecked	Negative control	-	-	-	-	-	B1	SYBR Green I		0	0	Replicate group contains positives and negatives.			38
255;132;197;238	D3	gapdh	None	-	-	Negative	Unchecked	Negative control	-	-	-	-	-	B1	SYBR Green I		0.1	0.79	Replicate group contains positives and negatives.			39
255;132;197;238	D4	gapdh	None	28.19	-	Positive	Unchecked	Negative control	-	25.33	1.92	-	-	B1	SYBR Green I		0.8	3.17	Neg Ctrl is positive, Replicate group contains positives and negatives.			40
255;132;197;238	D5	gapdh	None	27.53	-	Positive	Unchecked	Negative control	-	25.33	1.92	-	-	B1	SYBR Green I		1.79	5.05	Neg Ctrl is positive, Replicate group contains positives and negatives.			41
255;132;197;238	D6	gapdh	None	27.34	-	Positive	Unchecked	Negative control	-	25.33	1.92	-	-	B1	SYBR Green I		1.82	5.08	Neg Ctrl is positive, Replicate group contains positives and negatives.			42
255;132;197;238	D7	PTTR2-1	None	30.9	-	Positive	Unchecked	Unknown	-	31.39	1.36	-	-	B7	SYBR Green I		1.29	4.24	Replicate group contains positives and negatives.			43
255;132;197;238	D8	PTTR2-1	None	31.79	-	Positive	Unchecked	Unknown	-	31.39	1.36	-	-	B7	SYBR Green I		1.33	4.06	Replicate group contains positives and negatives.			44
255;132;197;238	D9	PTTR2-1	None	31.38	-	Positive	Unchecked	Unknown	-	31.39	1.36	-	-	B7	SYBR Green I		1	3.62	Replicate group contains positives and negatives.			45
255;132;197;238	D10	PTTR2-1	None	-	-	Negative	Unchecked	Unknown	-	-	-	-	-	B7	SYBR Green I		0.05	0.48	Replicate group contains positives and negatives.			46
255;132;197;238	D11	PTTR2-1	None	-	-	Negative	Unchecked	Unknown	-	-	-	-	-	B7	SYBR Green I		0.09	1.04	Replicate group contains positives and negatives.			47
255;132;197;238	D12	PTTR2-1	None	-	-	Negative	Unchecked	Unknown	-	-	-	-	-	B7	SYBR Green I		0.04	0.48	Replicate group contains positives and negatives.			48
255;132;197;238	E1	gapdh	None	-	-	Negative	Unchecked	Negative control	-	-	-	-	-	B1	SYBR Green I		0.02	0.16	Replicate group contains positives and negatives.			49
255;132;197;238	E2	gapdh	None	-	-	Negative	Unchecked	Negative control	-	-	-	-	-	B1	SYBR Green I		0.01	0.05	Replicate group contains positives and negatives.			50
255;132;197;238	E3	gapdh	None	-	-	Negative	Unchecked	Negative control	-	-	-	-	-	B1	SYBR Green I		0.07	0.75	Replicate group contains positives and negatives.			51
255;132;197;238	E4	gapdh	None	23.99	-	Positive	Unchecked	Negative control	-	25.33	1.92	-	-	B1	SYBR Green I		1.29	4.36	Neg Ctrl is positive, Replicate group contains positives and negatives.			52
255;132;197;238	E5	gapdh	None	23.69	-	Positive	Unchecked	Negative control	-	25.33	1.92	-	-	B1	SYBR Green I		1.87	5.26	Neg Ctrl is positive, Replicate group contains positives and negatives.			53
255;132;197;238	E6	gapdh	None	23.76	-	Positive	Unchecked	Negative control	-	25.33	1.92	-	-	B1	SYBR Green I		1.64	4.94	Neg Ctrl is positive, Replicate group contains positives and negatives.			54
255;132;197;238	E7	PTTR2-1	None	30.98	-	Positive	Unchecked	Unknown	-	31.39	1.36	-	-	B7	SYBR Green I		1.44	4.45	Replicate group contains positives and negatives.			55
255;132;197;238	E8	PTTR2-1	None	30.99	-	Positive	Unchecked	Unknown	-	31.39	1.36	-	-	B7	SYBR Green I		1.12	3.83	Replicate group contains positives and negatives.			56
255;132;197;238	E9	PTTR2-1	None	30.88	-	Positive	Unchecked	Unknown	-	31.39	1.36	-	-	B7	SYBR Green I		1.36	4.32	Replicate group contains positives and negatives.			57
255;132;197;238	E10	PTTR2-1	None	-	-	Negative	Unchecked	Unknown	-	-	-	-	-	B7	SYBR Green I		0.04	0.44	Replicate group contains positives and negatives.			58
255;132;197;238	E11	PTTR2-1	None	-	-	Invalid	Unchecked	Unknown	-	-	-	-	-	B7	SYBR Green I		-	-	Replicate group contains positives and negatives.			59
255;132;197;238	E12	PTTR2-1	None	-	-	Negative	Unchecked	Unknown	-	-	-	-	-	B7	SYBR Green I		0.02	0.26	Replicate group contains positives and negatives.			60
255;132;197;238	F1	gapdh	None	-	-	Negative	Unchecked	Negative control	-	-	-	-	-	B1	SYBR Green I		0.1	0.87	Replicate group contains positives and negatives.			61
255;132;197;238	F2	gapdh	None	-	-	Negative	Unchecked	Negative control	-	-	-	-	-	B1	SYBR Green I		0.05	0.55	Replicate group contains positives and negatives.			62
255;132;197;238	F3	gapdh	None	-	-	Negative	Unchecked	Negative control	-	-	-	-	-	B1	SYBR Green I		0.06	1.12	Replicate group contains positives and negatives.			63
255;132;197;238	F4	gapdh	None	24.22	-	Positive	Unchecked	Negative control	-	25.33	1.92	-	-	B1	SYBR Green I		2.15	5.56	Neg Ctrl is positive, Replicate group contains positives and negatives.			64
255;132;197;238	F5	gapdh	None	24.24	-	Positive	Unchecked	Negative control	-	25.33	1.92	-	-	B1	SYBR Green I		1.99	5.36	Neg Ctrl is positive, Replicate group contains positives and negatives.			65
255;132;197;238	F6	gapdh	None	24.12	-	Positive	Unchecked	Negative control	-	25.33	1.92	-	-	B1	SYBR Green I		2.27	5.66	Neg Ctrl is positive, Replicate group contains positives and negatives.			66
255;132;197;238	F7	PTTR2-1	None	31.9	-	Positive	Unchecked	Unknown	-	31.39	1.36	-	-	B7	SYBR Green I		1.67	4.48	Replicate group contains positives and negatives.			67
255;132;197;238	F8	PTTR2-1	None	31.75	-	Positive	Unchecked	Unknown	-	31.39	1.36	-	-	B7	SYBR Green I		1.42	4.19	Replicate group contains positives and negatives.			68
255;132;197;238	F9	PTTR2-1	None	31.92	-	Positive	Unchecked	Unknown	-	31.39	1.36	-	-	B7	SYBR Green I		1.66	4.44	Replicate group contains positives and negatives.			69
255;132;197;238	F10	PTTR2-1	None	-	-	Negative	Unchecked	Unknown	-	-	-	-	-	B7	SYBR Green I		0.04	0.26	Replicate group contains positives and negatives.			70
255;132;197;238	F11	PTTR2-1	None	-	-	Negative	Unchecked	Unknown	-	-	-	-	-	B7	SYBR Green I		0	0.02	Replicate group contains positives and negatives.			71
255;132;197;238	F12	PTTR2-1	None	-	-	Negative	Unchecked	Unknown	-	-	-	-	-	B7	SYBR Green I		0.13	0.74	Replicate group contains positives and negatives.			72
255;132;197;238	G1	gapdh	None	-	-	Negative	Unchecked	Negative control	-	-	-	-	-	B1	SYBR Green I		0.01	0.07	Replicate group contains positives and negatives.			73
255;132;197;238	G2	gapdh	None	-	-	Negative	Unchecked	Negative control	-	-	-	-	-	B1	SYBR Green I		0	0	Replicate group contains positives and negatives.			74
255;132;197;238	G3	gapdh	None	-	-	Negative	Unchecked	Negative control	-	-	-	-	-	B1	SYBR Green I		0	0.03	Replicate group contains positives and negatives.			75
255;132;197;238	G4	gapdh	None	27.96	-	Positive	Unchecked	Negative control	-	25.33	1.92	-	-	B1	SYBR Green I		1.86	5.65	Neg Ctrl is positive, Replicate group contains positives and negatives.			76
255;132;197;238	G5	gapdh	None	28.01	-	Positive	Unchecked	Negative control	-	25.33	1.92	-	-	B1	SYBR Green I		2.29	5.6	Neg Ctrl is positive, Replicate group contains positives and negatives.			77
255;132;197;238	G6	gapdh	None	28.05	-	Positive	Unchecked	Negative control	-	25.33	1.92	-	-	B1	SYBR Green I		2.13	5.44	Neg Ctrl is positive, Replicate group contains positives and negatives.			78
255;132;197;238	G7	PTTR2-1	None	34.28	-	Positive	Unchecked	Unknown	-	31.39	1.36	-	-	B7	SYBR Green I		1	2.75	Replicate group contains positives and negatives.			79
255;132;197;238	G8	PTTR2-1	None	33.09	-	Positive	Unchecked	Unknown	-	31.39	1.36	-	-	B7	SYBR Green I		1.34	3.62	Replicate group contains positives and negatives.			80
255;132;197;238	G9	PTTR2-1	None	33.29	-	Positive	Unchecked	Unknown	-	31.39	1.36	-	-	B7	SYBR Green I		1.35	3.56	Replicate group contains positives and negatives.			81
255;132;197;238	G10	PTTR2-1	None	-	-	Negative	Unchecked	Unknown	-	-	-	-	-	B7	SYBR Green I		0.04	0.48	Replicate group contains positives and negatives.			82
255;132;197;238	G11	PTTR2-1	None	-	-	Invalid	Unchecked	Unknown	-	-	-	-	-	B7	SYBR Green I		-	-	Replicate group contains positives and negatives.			83
255;132;197;238	G12	PTTR2-1	None	-	-	Negative	Unchecked	Unknown	-	-	-	-	-	B7	SYBR Green I		0.01	0.05	Replicate group contains positives and negatives.			84
255;132;197;238	H1	8	None	-	-	Negative	Unchecked	Unknown	-	-	-	-	-	H1	SYBR Green I		0.04	0.34	Replicate group contains positives and negatives.			85
255;132;197;238	H2	8	None	28.89	-	Positive	Unchecked	Unknown	-	28.43	2.69	-	-	H1	SYBR Green I		0.11	1.04	Replicate group contains positives and negatives.			86
255;132;197;238	H3	8	None	-	-	Negative	Unchecked	Unknown	-	-	-	-	-	H1	SYBR Green I		0.1	0.78	Replicate group contains positives and negatives.			87
255;132;197;238	H4	8	None	25.71	-	Positive	Unchecked	Unknown	-	28.43	2.69	-	-	H1	SYBR Green I		1.92	5.25	Replicate group contains positives and negatives.			88
255;132;197;238	H5	8	None	25.56	-	Positive	Unchecked	Unknown	-	28.43	2.69	-	-	H1	SYBR Green I		2.24	5.59	Replicate group contains positives and negatives.			89
255;132;197;238	H6	8	None	25.86	-	Positive	Unchecked	Unknown	-	28.43	2.69	-	-	H1	SYBR Green I		1.8	5.1	Replicate group contains positives and negatives.			90
255;132;197;238	H7	8	None	30.39	-	Positive	Unchecked	Unknown	-	28.43	2.69	-	-	H1	SYBR Green I		1.22	4.09	Replicate group contains positives and negatives.			91
255;132;197;238	H8	8	None	31.87	-	Positive	Unchecked	Unknown	-	28.43	2.69	-	-	H1	SYBR Green I		1.55	4.36	Replicate group contains positives and negatives.			92
255;132;197;238	H9	8	None	30.75	-	Positive	Unchecked	Unknown	-	28.43	2.69	-	-	H1	SYBR Green I		1.38	4.4	Replicate group contains positives and negatives.			93
255;132;197;238	H10	8	None	-	-	Negative	Unchecked	Unknown	-	-	-	-	-	H1	SYBR Green I		0.06	0.37	Replicate group contains positives and negatives.			94
255;132;197;238	H11	8	None	-	-	Negative	Unchecked	Unknown	-	-	-	-	-	H1	SYBR Green I		0.04	0.18	Replicate group contains positives and negatives.			95
255;132;197;238	H12	8	None	-	-	Negative	Unchecked	Unknown	-	-	-	-	-	H1	SYBR Green I		0.04	0.3	Replicate group contains positives and negatives.			96

## Sheet: dup2
color	Position	Sample Name	Gene Name	Cq	Concentration	Call	Excluded	Sample Type	Standard	Cq Mean	Cq Error	Concentration Mean	Concentration Error	Replicate Group	Dye	Edited Call	Slope	EPF	Failure	Notes	Sample Prep Notes	Number
255;132;197;238	A1	1	None	28.69	-	Positive	Unchecked	Unknown	-	25.52	2.57	-	-	A1	SYBR Green I		0.87	3.58	None			1
255;132;197;238	A2	1	None	28.41	-	Positive	Unchecked	Unknown	-	25.52	2.57	-	-	A1	SYBR Green I		0.85	3.42	None			2
255;132;197;238	A3	1	None	27.7	-	Positive	Unchecked	Unknown	-	25.52	2.57	-	-	A1	SYBR Green I		0.92	3.6	None			3
255;132;197;238	A4	1	None	21.93	-	Positive	Unchecked	Unknown	-	25.52	2.57	-	-	A1	SYBR Green I		1.25	4.4	None			4
255;132;197;238	A5	1	None	21.89	-	Positive	Unchecked	Unknown	-	25.52	2.57	-	-	A1	SYBR Green I		1.24	4.33	None			5
255;132;197;238	A6	1	None	22.01	-	Positive	Unchecked	Unknown	-	25.52	2.57	-	-	A1	SYBR Green I		1.42	4.69	None			6
255;132;197;238	A7	1	None	24.42	-	Positive	Unchecked	Unknown	-	25.52	2.57	-	-	A1	SYBR Green I		1.04	3.86	None			7
255;132;197;238	A8	1	None	24.7	-	Positive	Unchecked	Unknown	-	25.52	2.57	-	-	A1	SYBR Green I		0.94	3.66	None			8
255;132;197;238	A9	1	None	24.82	-	Positive	Unchecked	Unknown	-	25.52	2.57	-	-	A1	SYBR Green I		1.05	3.88	None			9
255;132;197;238	A10	1	None	27.16	-	Positive	Unchecked	Unknown	-	25.52	2.57	-	-	A1	SYBR Green I		1.37	4.49	None			10
255;132;197;238	A11	1	None	27.33	-	Positive	Unchecked	Unknown	-	25.52	2.57	-	-	A1	SYBR Green I		1.26	4.26	None			11
255;132;197;238	A12	1	None	27.23	-	Positive	Unchecked	Unknown	-	25.52	2.57	-	-	A1	SYBR Green I		1.32	4.39	None			12
255;132;197;238	B1	gapdh	None	27.97	-	Positive	Unchecked	Negative control	-	25.93	2.95	-	-	B1	SYBR Green I		0.81	3.6	Neg Ctrl is positive			13
255;132;197;238	B2	gapdh	None	27.97	-	Positive	Unchecked	Negative control	-	25.93	2.95	-	-	B1	SYBR Green I		0.85	3.62	Neg Ctrl is positive			14
255;132;197;238	B3	gapdh	None	28.6	-	Positive	Unchecked	Negative control	-	25.93	2.95	-	-	B1	SYBR Green I		0.88	3.7	Neg Ctrl is positive			15
255;132;197;238	B4	gapdh	None	20.53	-	Positive	Unchecked	Negative control	-	25.93	2.95	-	-	B1	SYBR Green I		1.57	4.95	Neg Ctrl is positive			16
255;132;197;238	B5	gapdh	None	20.06	-	Positive	Unchecked	Negative control	-	25.93	2.95	-	-	B1	SYBR Green I		1.22	4.36	Neg Ctrl is positive			17
255;132;197;238	B6	gapdh	None	20.49	-	Positive	Unchecked	Negative control	-	25.93	2.95	-	-	B1	SYBR Green I		0.9	3.59	Neg Ctrl is positive			18
255;132;197;238	B7	PTTR2-1	None	22.92	-	Positive	Unchecked	Unknown	-	27.19	1.89	-	-	B7	SYBR Green I		1.07	3.95	None			19
255;132;197;238	B8	PTTR2-1	None	22.9	-	Positive	Unchecked	Unknown	-	27.19	1.89	-	-	B7	SYBR Green I		1.21	4.27	None			20
255;132;197;238	B9	PTTR2-1	None	23.41	-	Positive	Unchecked	Unknown	-	27.19	1.89	-	-	B7	SYBR Green I		0.72	3.06	None			21
255;132;197;238	B10	PTTR2-1	None	25.45	-	Positive	Unchecked	Unknown	-	27.19	1.89	-	-	B7	SYBR Green I		1.4	4.58	None			22
255;132;197;238	B11	PTTR2-1	None	25.73	-	Positive	Unchecked	Unknown	-	27.19	1.89	-	-	B7	SYBR Green I		1.55	4.83	None			23
255;132;197;238	B12	PTTR2-1	None	26.23	-	Positive	Unchecked	Unknown	-	27.19	1.89	-	-	B7	SYBR Green I		1.39	4.64	None			24
255;132;197;238	C1	gapdh	None	28.37	-	Positive	Unchecked	Negative control	-	25.93	2.95	-	-	B1	SYBR Green I		1.12	3.99	Neg Ctrl is positive			25
255;132;197;238	C2	gapdh	None	28.48	-	Positive	Unchecked	Negative control	-	25.93	2.95	-	-	B1	SYBR Green I		1.08	3.91	Neg Ctrl is positive			26
255;132;197;238	C3	gapdh	None	28.55	-	Positive	Unchecked	Negative control	-	25.93	2.95	-	-	B1	SYBR Green I		1.08	3.9	Neg Ctrl is positive			27
255;132;197;238	C4	gapdh	None	22.23	-	Positive	Unchecked	Negative control	-	25.93	2.95	-	-	B1	SYBR Green I		1.62	5	Neg Ctrl is positive			28
255;132;197;238	C5	gapdh	None	22.22	-	Positive	Unchecked	Negative control	-	25.93	2.95	-	-	B1	SYBR Green I		1.54	4.85	Neg Ctrl is positive			29
255;132;197;238	C6	gapdh	None	22.15	-	Positive	Unchecked	Negative control	-	25.93	2.95	-	-	B1	SYBR Green I		1.76	5.17	Neg Ctrl is positive			30
255;132;197;238	C7	PTTR2-1	None	25.49	-	Positive	Unchecked	Unknown	-	27.19	1.89	-	-	B7	SYBR Green I		1.05	3.88	None			31
255;132;197;238	C8	PTTR2-1	None	25.32	-	Positive	Unchecked	Unknown	-	27.19	1.89	-	-	B7	SYBR Green I		1.26	4.31	None			32
255;132;197;238	C9	PTTR2-1	None	25.35	-	Positive	Unchecked	Unknown	-	27.19	1.89	-	-	B7	SYBR Green I		1.14	4.07	None			33
255;132;197;238	C10	PTTR2-1	None	27.2	-	Positive	Unchecked	Unknown	-	27.19	1.89	-	-	B7	SYBR Green I		1.53	4.75	None			34
255;132;197;238	C11	PTTR2-1	None	27.2	-	Positive	Unchecked	Unknown	-	27.19	1.89	-	-	B7	SYBR Green I		1.73	5.03	None			35
255;132;197;238	C12	PTTR2-1	None	27.12	-	Positive	Unchecked	Unknown	-	27.19	1.89	-	-	B7	SYBR Green I		1.75	5.07	None			36
255;132;197;238	D1	gapdh	None	27.97	-	Positive	Unchecked	Negative control	-	25.93	2.95	-	-	B1	SYBR Green I		1.09	3.87	Neg Ctrl is positive			37
255;132;197;238	D2	gapdh	None	29.28	-	Positive	Unchecked	Negative control	-	25.93	2.95	-	-	B1	SYBR Green I		0.59	2.61	Neg Ctrl is positive			38
255;132;197;238	D3	gapdh	None	27.51	-	Positive	Unchecked	Negative control	-	25.93	2.95	-	-	B1	SYBR Green I		1.21	4.11	Neg Ctrl is positive			39
255;132;197;238	D4	gapdh	None	23.78	-	Positive	Unchecked	Negative control	-	25.93	2.95	-	-	B1	SYBR Green I		0.78	3.25	Neg Ctrl is positive			40
255;132;197;238	D5	gapdh	None	23.08	-	Positive	Unchecked	Negative control	-	25.93	2.95	-	-	B1	SYBR Green I		1.84	5.24	Neg Ctrl is positive			41
255;132;197;238	D6	gapdh	None	22.67	-	Positive	Unchecked	Negative control	-	25.93	2.95	-	-	B1	SYBR Green I		1.72	5.13	Neg Ctrl is positive			42
255;132;197;238	D7	PTTR2-1	None	27.97	-	Positive	Unchecked	Unknown	-	27.19	1.89	-	-	B7	SYBR Green I		1.27	4.21	None			43
255;132;197;238	D8	PTTR2-1	None	27.87	-	Positive	Unchecked	Unknown	-	27.19	1.89	-	-	B7	SYBR Green I		1.19	4.06	None			44
255;132;197;238	D9	PTTR2-1	None	27.69	-	Positive	Unchecked	Unknown	-	27.19	1.89	-	-	B7	SYBR Green I		0.92	3.51	None			45
255;132;197;238	D10	PTTR2-1	None	29.78	-	Positive	Unchecked	Unknown	-	27.19	1.89	-	-	B7	SYBR Green I		1.36	4.34	None			46
255;132;197;238	D11	PTTR2-1	None	29.63	-	Positive	Unchecked	Unknown	-	27.19	1.89	-	-	B7	SYBR Green I		1.57	4.7	None			47
255;132;197;238	D12	PTTR2-1	None	29.57	-	Positive	Unchecked	Unknown	-	27.19	1.89	-	-	B7	SYBR Green I		1.52	4.66	None			48
255;132;197;238	E1	gapdh	None	29.46	-	Positive	Unchecked	Negative control	-	25.93	2.95	-	-	B1	SYBR Green I		1.09	3.78	Neg Ctrl is positive			49
255;132;197;238	E2	gapdh	None	28.48	-	Positive	Unchecked	Negative control	-	25.93	2.95	-	-	B1	SYBR Green I		0.94	3.53	Neg Ctrl is positive			50
255;132;197;238	E3	gapdh	None	28.57	-	Positive	Unchecked	Negative control	-	25.93	2.95	-	-	B1	SYBR Green I		0.93	3.54	Neg Ctrl is positive			51
255;132;197;238	E4	gapdh	None	24.27	-	Positive	Unchecked	Negative control	-	25.93	2.95	-	-	B1	SYBR Green I		1.67	5.01	Neg Ctrl is positive			52
255;132;197;238	E5	gapdh	None	24.43	-	Positive	Unchecked	Negative control	-	25.93	2.95	-	-	B1	SYBR Green I		1.82	5.22	Neg Ctrl is positive			53
255;132;197;238	E6	gapdh	None	24.56	-	Positive	Unchecked	Negative control	-	25.93	2.95	-	-	B1	SYBR Green I		1.88	5.27	Neg Ctrl is positive			54
255;132;197;238	E7	PTTR2-1	None	27.42	-	Positive	Unchecked	Unknown	-	27.19	1.89	-	-	B7	SYBR Green I		1.23	4.14	None			55
255;132;197;238	E8	PTTR2-1	None	27.53	-	Positive	Unchecked	Unknown	-	27.19	1.89	-	-	B7	SYBR Green I		1.16	4.02	None			56
255;132;197;238	E9	PTTR2-1	None	27.57	-	Positive	Unchecked	Unknown	-	27.19	1.89	-	-	B7	SYBR Green I		1.22	4.12	None			57
255;132;197;238	E10	PTTR2-1	None	27.25	-	Positive	Unchecked	Unknown	-	27.19	1.89	-	-	B7	SYBR Green I		1.57	4.81	None			58
255;132;197;238	E11	PTTR2-1	None	27.27	-	Positive	Unchecked	Unknown	-	27.19	1.89	-	-	B7	SYBR Green I		1.77	5.09	None			59
255;132;197;238	E12	PTTR2-1	None	27.08	-	Positive	Unchecked	Unknown	-	27.19	1.89	-	-	B7	SYBR Green I		1.59	4.87	None			60
255;132;197;238	F1	gapdh	None	28.98	-	Positive	Unchecked	Negative control	-	25.93	2.95	-	-	B1	SYBR Green I		0.93	3.55	Neg Ctrl is positive			61
255;132;197;238	F2	gapdh	None	29.04	-	Positive	Unchecked	Negative control	-	25.93	2.95	-	-	B1	SYBR Green I		0.66	2.94	Neg Ctrl is positive			62
255;132;197;238	F3	gapdh	None	28.95	-	Positive	Unchecked	Negative control	-	25.93	2.95	-	-	B1	SYBR Green I		0.73	3.08	Neg Ctrl is positive			63
255;132;197;238	F4	gapdh	None	25.07	-	Positive	Unchecked	Negative control	-	25.93	2.95	-	-	B1	SYBR Green I		1.6	4.84	Neg Ctrl is positive			64
255;132;197;238	F5	gapdh	None	23.65	-	Positive	Unchecked	Negative control	-	25.93	2.95	-	-	B1	SYBR Green I		1	3.85	Neg Ctrl is positive			65
255;132;197;238	F6	gapdh	None	24.71	-	Positive	Unchecked	Negative control	-	25.93	2.95	-	-	B1	SYBR Green I		1.66	4.96	Neg Ctrl is positive			66
255;132;197;238	F7	PTTR2-1	None	26.82	-	Positive	Unchecked	Unknown	-	27.19	1.89	-	-	B7	SYBR Green I		1.2	4.12	None			67
255;132;197;238	F8	PTTR2-1	None	27.72	-	Positive	Unchecked	Unknown	-	27.19	1.89	-	-	B7	SYBR Green I		1.34	4.32	None			68
255;132;197;238	F9	PTTR2-1	None	27.96	-	Positive	Unchecked	Unknown	-	27.19	1.89	-	-	B7	SYBR Green I		1.32	4.29	None			69
255;132;197;238	F10	PTTR2-1	None	25.96	-	Positive	Unchecked	Unknown	-	27.19	1.89	-	-	B7	SYBR Green I		1.57	4.84	None			70
255;132;197;238	F11	PTTR2-1	None	26.19	-	Positive	Unchecked	Unknown	-	27.19	1.89	-	-	B7	SYBR Green I		1.11	3.95	None			71
255;132;197;238	F12	PTTR2-1	None	26.92	-	Positive	Unchecked	Unknown	-	27.19	1.89	-	-	B7	SYBR Green I		1.99	5.36	None			72
255;132;197;238	G1	gapdh	None	28.29	-	Positive	Unchecked	Negative control	-	25.93	2.95	-	-	B1	SYBR Green I		0.61	2.72	Neg Ctrl is positive			73
255;132;197;238	G2	gapdh	None	28.17	-	Positive	Unchecked	Negative control	-	25.93	2.95	-	-	B1	SYBR Green I		0.56	2.6	Neg Ctrl is positive			74
255;132;197;238	G3	gapdh	None	29.4	-	Positive	Unchecked	Negative control	-	25.93	2.95	-	-	B1	SYBR Green I		0.7	2.94	Neg Ctrl is positive			75
255;132;197;238	G4	gapdh	None	25.02	-	Positive	Unchecked	Negative control	-	25.93	2.95	-	-	B1	SYBR Green I		1.78	5.06	Neg Ctrl is positive			76
255;132;197;238	G5	gapdh	None	25.13	-	Positive	Unchecked	Negative control	-	25.93	2.95	-	-	B1	SYBR Green I		1.63	4.86	Neg Ctrl is positive			77
255;132;197;238	G6	gapdh	None	25.5	-	Positive	Unchecked	Negative control	-	25.93	2.95	-	-	B1	SYBR Green I		1.35	4.4	Neg Ctrl is positive			78
255;132;197;238	G7	PTTR2-1	None	28.3	-	Positive	Unchecked	Unknown	-	27.19	1.89	-	-	B7	SYBR Green I		0.71	2.98	None			79
255;132;197;238	G8	PTTR2-1	None	29.8	-	Positive	Unchecked	Unknown	-	27.19	1.89	-	-	B7	SYBR Green I		1.1	4.19	None			80
255;132;197;238	G9	PTTR2-1	None	27.98	-	Positive	Unchecked	Unknown	-	27.19	1.89	-	-	B7	SYBR Green I		1.13	3.98	None			81
255;132;197;238	G10	PTTR2-1	None	30.28	-	Positive	Unchecked	Unknown	-	27.19	1.89	-	-	B7	SYBR Green I		1.51	4.56	None			82
255;132;197;238	G11	PTTR2-1	None	29.39	-	Positive	Unchecked	Unknown	-	27.19	1.89	-	-	B7	SYBR Green I		1.68	4.79	None			83
255;132;197;238	G12	PTTR2-1	None	30.66	-	Positive	Unchecked	Unknown	-	27.19	1.89	-	-	B7	SYBR Green I		1.62	4.65	None			84
255;132;197;238	H1	8	None	29.33	-	Positive	Unchecked	Unknown	-	26.31	2.93	-	-	H1	SYBR Green I		0.87	3.42	None			85
255;132;197;238	H2	8	None	28.03	-	Positive	Unchecked	Unknown	-	26.31	2.93	-	-	H1	SYBR Green I		1	3.71	None			86
255;132;197;238	H3	8	None	28.1	-	Positive	Unchecked	Unknown	-	26.31	2.93	-	-	H1	SYBR Green I		1.05	3.8	None			87
255;132;197;238	H4	8	None	21.87	-	Positive	Unchecked	Unknown	-	26.31	2.93	-	-	H1	SYBR Green I		1.52	4.91	None			88
255;132;197;238	H5	8	None	21.8	-	Positive	Unchecked	Unknown	-	26.31	2.93	-	-	H1	SYBR Green I		1.53	4.9	None			89
255;132;197;238	H6	8	None	21.89	-	Positive	Unchecked	Unknown	-	26.31	2.93	-	-	H1	SYBR Green I		1.48	4.83	None			90
255;132;197;238	H7	8	None	25.91	-	Positive	Unchecked	Unknown	-	26.31	2.93	-	-	H1	SYBR Green I		1.17	4.13	None			91
255;132;197;238	H8	8	None	26.2	-	Positive	Unchecked	Unknown	-	26.31	2.93	-	-	H1	SYBR Green I		1.09	3.95	None			92
255;132;197;238	H9	8	None	26.03	-	Positive	Unchecked	Unknown	-	26.31	2.93	-	-	H1	SYBR Green I		1.1	4.01	None			93
255;132;197;238	H10	8	None	28.81	-	Positive	Unchecked	Unknown	-	26.31	2.93	-	-	H1	SYBR Green I		1.54	4.72	None			94
255;132;197;238	H11	8	None	28.86	-	Positive	Unchecked	Unknown	-	26.31	2.93	-	-	H1	SYBR Green I		1.71	4.93	None			95
255;132;197;238	H12	8	None	28.91	-	Positive	Unchecked	Unknown	-	26.31	2.93	-	-	H1	SYBR Green I		1.93	5.22	None			96

## Sheet: dup1
color	Position	Sample Name	Gene Name	Cq	Concentration	Call	Excluded	Sample Type	Standard	Cq Mean	Cq Error	Concentration Mean	Concentration Error	Replicate Group	Dye	Edited Call	Slope	EPF	Failure	Notes	Sample Prep Notes	Number
255;132;197;238	A1	GAPDH	None	29.58	-	Positive	Unchecked	Positive control	-	31.45	1.48	-	-	A1	SYBR Green I		0.94	3.62	None			1
255;132;197;238	A2	GAPDH	None	29.42	-	Positive	Unchecked	Positive control	-	31.45	1.48	-	-	A1	SYBR Green I		1.08	3.94	None			2
255;132;197;238	A3	GAPDH	None	29.36	-	Positive	Unchecked	Positive control	-	31.45	1.48	-	-	A1	SYBR Green I		0.76	3.34	None			3
255;132;197;238	A4	EGR1	None	21.82	-	Positive	Unchecked	Standard	-	22.55	1.57	-	-	A4	SYBR Green I		1.28	4.41	None			4
255;132;197;238	A5	EGR1	None	21.9	-	Positive	Unchecked	Standard	-	22.55	1.57	-	-	A4	SYBR Green I		1.27	4.39	None			5
255;132;197;238	A6	EGR1	None	21.95	-	Positive	Unchecked	Standard	-	22.55	1.57	-	-	A4	SYBR Green I		1.02	3.88	None			6
255;132;197;238	A7	mme1	None	-	-	Negative	Unchecked	Standard	-	-	-	-	-	A7	SYBR Green I		0.11	0.62	Standard is negative			7
255;132;197;238	A8	mme1	None	-	-	Negative	Unchecked	Standard	-	-	-	-	-	A7	SYBR Green I		0.09	0.7	Standard is negative			8
255;132;197;238	A9	mme1	None	-	-	Negative	Unchecked	Standard	-	-	-	-	-	A7	SYBR Green I		0.12	0.68	Standard is negative			9
255;132;197;238	A10	prpt1	None	23.72	-	Positive	Unchecked	Standard	-	23.03	1.15	-	-	A10	SYBR Green I		0.69	3.07	None			10
255;132;197;238	A11	prpt1	None	23.74	-	Positive	Unchecked	Standard	-	23.03	1.15	-	-	A10	SYBR Green I		0.77	3.27	None			11
255;132;197;238	A12	prpt1	None	23.8	-	Positive	Unchecked	Standard	-	23.03	1.15	-	-	A10	SYBR Green I		0.57	2.8	None			12
255;132;197;238	B1	GAPDH	None	31.78	-	Positive	Unchecked	Positive control	-	31.45	1.48	-	-	A1	SYBR Green I		1.2	3.93	None			13
255;132;197;238	B2	GAPDH	None	30.95	-	Positive	Unchecked	Positive control	-	31.45	1.48	-	-	A1	SYBR Green I		1.35	4.04	None			14
255;132;197;238	B3	GAPDH	None	31.65	-	Positive	Unchecked	Positive control	-	31.45	1.48	-	-	A1	SYBR Green I		0.73	2.9	None			15
255;132;197;238	B4	EGR1	None	22.63	-	Positive	Unchecked	Standard	-	22.55	1.57	-	-	A4	SYBR Green I		1.6	4.89	None			16
255;132;197;238	B5	EGR1	None	22.72	-	Positive	Unchecked	Standard	-	22.55	1.57	-	-	A4	SYBR Green I		1.51	4.75	None			17
255;132;197;238	B6	EGR1	None	23.63	-	Positive	Unchecked	Standard	-	22.55	1.57	-	-	A4	SYBR Green I		0.64	2.66	None			18
255;132;197;238	B7	mme1	None	-	-	Negative	Unchecked	Standard	-	-	-	-	-	A7	SYBR Green I		0.11	0.69	Standard is negative			19
255;132;197;238	B8	mme1	None	-	-	Negative	Unchecked	Standard	-	-	-	-	-	A7	SYBR Green I		0.1	0.72	Standard is negative			20
255;132;197;238	B9	mme1	None	-	-	Negative	Unchecked	Standard	-	-	-	-	-	A7	SYBR Green I		0.09	0.45	Standard is negative			21
255;132;197;238	B10	prpt1	None	23.93	-	Positive	Unchecked	Standard	-	23.03	1.15	-	-	A10	SYBR Green I		0.64	2.57	None			22
255;132;197;238	B11	prpt1	None	22.92	-	Positive	Unchecked	Standard	-	23.03	1.15	-	-	A10	SYBR Green I		0.95	3.74	None			23
255;132;197;238	B12	prpt1	None	22.94	-	Positive	Unchecked	Standard	-	23.03	1.15	-	-	A10	SYBR Green I		0.74	3.23	None			24
255;132;197;238	C1	GAPDH	None	29.66	-	Positive	Unchecked	Positive control	-	31.45	1.48	-	-	A1	SYBR Green I		1.24	4.13	None			25
255;132;197;238	C2	GAPDH	None	30.63	-	Positive	Unchecked	Positive control	-	31.45	1.48	-	-	A1	SYBR Green I		0.3	1.72	None			26
255;132;197;238	C3	GAPDH	None	30.47	-	Positive	Unchecked	Positive control	-	31.45	1.48	-	-	A1	SYBR Green I		0.81	3.59	None			27
255;132;197;238	C4	EGR1	None	23.06	-	Positive	Unchecked	Standard	-	22.55	1.57	-	-	A4	SYBR Green I		1.46	4.78	None			28
255;132;197;238	C5	EGR1	None	23.25	-	Positive	Unchecked	Standard	-	22.55	1.57	-	-	A4	SYBR Green I		1.47	4.72	None			29
255;132;197;238	C6	EGR1	None	23.31	-	Positive	Unchecked	Standard	-	22.55	1.57	-	-	A4	SYBR Green I		1.45	4.69	None			30
255;132;197;238	C7	mme1	None	-	-	Negative	Unchecked	Standard	-	-	-	-	-	A7	SYBR Green I		0.12	0.65	Standard is negative			31
255;132;197;238	C8	mme1	None	-	-	Negative	Unchecked	Standard	-	-	-	-	-	A7	SYBR Green I		0.11	0.7	Standard is negative			32
255;132;197;238	C9	mme1	None	-	-	Negative	Unchecked	Standard	-	-	-	-	-	A7	SYBR Green I		0.12	0.66	Standard is negative			33
255;132;197;238	C10	prpt1	None	24.33	-	Positive	Unchecked	Standard	-	23.03	1.15	-	-	A10	SYBR Green I		0.76	3.24	None			34
255;132;197;238	C11	prpt1	None	24.18	-	Positive	Unchecked	Standard	-	23.03	1.15	-	-	A10	SYBR Green I		0.85	3.47	None			35
255;132;197;238	C12	prpt1	None	24.39	-	Positive	Unchecked	Standard	-	23.03	1.15	-	-	A10	SYBR Green I		0.9	3.59	None			36
255;132;197;238	D1	GAPDH	None	29.72	-	Positive	Unchecked	Positive control	-	31.45	1.48	-	-	A1	SYBR Green I		1.11	3.97	None			37
255;132;197;238	D2	GAPDH	None	30.21	-	Positive	Unchecked	Positive control	-	31.45	1.48	-	-	A1	SYBR Green I		0.37	1.95	None			38
255;132;197;238	D3	GAPDH	None	28.8	-	Positive	Unchecked	Positive control	-	31.45	1.48	-	-	A1	SYBR Green I		1.02	3.86	None			39
255;132;197;238	D4	EGR1	None	22.16	-	Positive	Unchecked	Standard	-	22.55	1.57	-	-	A4	SYBR Green I		0.93	3.64	None			40
255;132;197;238	D5	EGR1	None	21.78	-	Positive	Unchecked	Standard	-	22.55	1.57	-	-	A4	SYBR Green I		1.51	4.77	None			41
255;132;197;238	D6	EGR1	None	22.05	-	Positive	Unchecked	Standard	-	22.55	1.57	-	-	A4	SYBR Green I		1.53	4.81	None			42
255;132;197;238	D7	mme1	None	-	-	Negative	Unchecked	Standard	-	-	-	-	-	A7	SYBR Green I		0.12	0.66	Standard is negative			43
255;132;197;238	D8	mme1	None	-	-	Negative	Unchecked	Standard	-	-	-	-	-	A7	SYBR Green I		0.1	0.7	Standard is negative			44
255;132;197;238	D9	mme1	None	-	-	Negative	Unchecked	Standard	-	-	-	-	-	A7	SYBR Green I		0.12	0.65	Standard is negative			45
255;132;197;238	D10	prpt1	None	24.17	-	Positive	Unchecked	Standard	-	23.03	1.15	-	-	A10	SYBR Green I		0.63	2.79	None			46
255;132;197;238	D11	prpt1	None	23.68	-	Positive	Unchecked	Standard	-	23.03	1.15	-	-	A10	SYBR Green I		0.85	3.49	None			47
255;132;197;238	D12	prpt1	None	23.8	-	Positive	Unchecked	Standard	-	23.03	1.15	-	-	A10	SYBR Green I		0.7	3.1	None			48
255;132;197;238	E1	GAPDH	None	33.15	-	Positive	Unchecked	Positive control	-	31.45	1.48	-	-	A1	SYBR Green I		0.95	3.25	None			49
255;132;197;238	E2	GAPDH	None	32.55	-	Positive	Unchecked	Positive control	-	31.45	1.48	-	-	A1	SYBR Green I		1.03	3.35	None			50
255;132;197;238	E3	GAPDH	None	32.98	-	Positive	Unchecked	Positive control	-	31.45	1.48	-	-	A1	SYBR Green I		0.81	2.92	None			51
255;132;197;238	E4	EGR1	None	23.9	-	Positive	Unchecked	Standard	-	22.55	1.57	-	-	A4	SYBR Green I		1.39	4.48	None			52
255;132;197;238	E5	EGR1	None	24.18	-	Positive	Unchecked	Standard	-	22.55	1.57	-	-	A4	SYBR Green I		1.38	4.45	None			53
255;132;197;238	E6	EGR1	None	23.79	-	Positive	Unchecked	Standard	-	22.55	1.57	-	-	A4	SYBR Green I		1.63	4.88	None			54
255;132;197;238	E7	mme1	None	-	-	Negative	Unchecked	Standard	-	-	-	-	-	A7	SYBR Green I		0.12	0.66	Standard is negative			55
255;132;197;238	E8	mme1	None	-	-	Negative	Unchecked	Standard	-	-	-	-	-	A7	SYBR Green I		0.13	0.66	Standard is negative			56
255;132;197;238	E9	mme1	None	-	-	Negative	Unchecked	Standard	-	-	-	-	-	A7	SYBR Green I		0.12	0.62	Standard is negative			57
255;132;197;238	E10	prpt1	None	21.82	-	Positive	Unchecked	Standard	-	23.03	1.15	-	-	A10	SYBR Green I		0.84	3.45	None			58
255;132;197;238	E11	prpt1	None	21.7	-	Positive	Unchecked	Standard	-	23.03	1.15	-	-	A10	SYBR Green I		0.86	3.5	None			59
255;132;197;238	E12	prpt1	None	21.73	-	Positive	Unchecked	Standard	-	23.03	1.15	-	-	A10	SYBR Green I		0.86	3.48	None			60
255;132;197;238	F1	GAPDH	None	32.18	-	Positive	Unchecked	Positive control	-	31.45	1.48	-	-	A1	SYBR Green I		1.23	3.84	None			61
255;132;197;238	F2	GAPDH	None	32.54	-	Positive	Unchecked	Positive control	-	31.45	1.48	-	-	A1	SYBR Green I		1.09	3.52	None			62
255;132;197;238	F3	GAPDH	None	31.57	-	Positive	Unchecked	Positive control	-	31.45	1.48	-	-	A1	SYBR Green I		1.26	3.91	None			63
255;132;197;238	F4	EGR1	None	24.18	-	Positive	Unchecked	Standard	-	22.55	1.57	-	-	A4	SYBR Green I		1.44	4.62	None			64
255;132;197;238	F5	EGR1	None	24.12	-	Positive	Unchecked	Standard	-	22.55	1.57	-	-	A4	SYBR Green I		1.43	4.6	None			65
255;132;197;238	F6	EGR1	None	24.1	-	Positive	Unchecked	Standard	-	22.55	1.57	-	-	A4	SYBR Green I		1.49	4.67	None			66
255;132;197;238	F7	mme1	None	-	-	Negative	Unchecked	Standard	-	-	-	-	-	A7	SYBR Green I		0.12	0.65	Standard is negative			67
255;132;197;238	F8	mme1	None	-	-	Negative	Unchecked	Standard	-	-	-	-	-	A7	SYBR Green I		0.11	0.65	Standard is negative			68
255;132;197;238	F9	mme1	None	-	-	Negative	Unchecked	Standard	-	-	-	-	-	A7	SYBR Green I		0.12	0.65	Standard is negative			69
255;132;197;238	F10	prpt1	None	23.69	-	Positive	Unchecked	Standard	-	23.03	1.15	-	-	A10	SYBR Green I		0.91	3.64	None			70
255;132;197;238	F11	prpt1	None	24.75	-	Positive	Unchecked	Standard	-	23.03	1.15	-	-	A10	SYBR Green I		0.48	2.07	None			71
255;132;197;238	F12	prpt1	None	23.52	-	Positive	Unchecked	Standard	-	23.03	1.15	-	-	A10	SYBR Green I		0.86	3.55	None			72
255;132;197;238	G1	GAPDH	None	33.01	-	Positive	Unchecked	Positive control	-	31.45	1.48	-	-	A1	SYBR Green I		0.75	2.76	None			73
255;132;197;238	G2	GAPDH	None	32.82	-	Positive	Unchecked	Positive control	-	31.45	1.48	-	-	A1	SYBR Green I		0.49	2.12	None			74
255;132;197;238	G3	GAPDH	None	32.94	-	Positive	Unchecked	Positive control	-	31.45	1.48	-	-	A1	SYBR Green I		0.88	3.17	None			75
255;132;197;238	G4	EGR1	None	23.29	-	Positive	Unchecked	Standard	-	22.55	1.57	-	-	A4	SYBR Green I		1.56	4.78	None			76
255;132;197;238	G5	EGR1	None	23.16	-	Positive	Unchecked	Standard	-	22.55	1.57	-	-	A4	SYBR Green I		1.42	4.57	None			77
255;132;197;238	G6	EGR1	None	23.17	-	Positive	Unchecked	Standard	-	22.55	1.57	-	-	A4	SYBR Green I		1.41	4.54	None			78
255;132;197;238	G7	mme1	None	-	-	Negative	Unchecked	Standard	-	-	-	-	-	A7	SYBR Green I		0.12	0.64	Standard is negative			79
255;132;197;238	G8	mme1	None	-	-	Negative	Unchecked	Standard	-	-	-	-	-	A7	SYBR Green I		0.12	0.66	Standard is negative			80
255;132;197;238	G9	mme1	None	-	-	Negative	Unchecked	Standard	-	-	-	-	-	A7	SYBR Green I		0.13	0.68	Standard is negative			81
255;132;197;238	G10	prpt1	None	21.32	-	Positive	Unchecked	Standard	-	23.03	1.15	-	-	A10	SYBR Green I		0.83	3.42	None			82
255;132;197;238	G11	prpt1	None	21.14	-	Positive	Unchecked	Standard	-	23.03	1.15	-	-	A10	SYBR Green I		0.81	3.49	None			83
255;132;197;238	G12	prpt1	None	21.32	-	Positive	Unchecked	Standard	-	23.03	1.15	-	-	A10	SYBR Green I		0.77	3.24	None			84
255;132;197;238	H1	GAPDH	None	32.68	-	Positive	Unchecked	Positive control	-	31.45	1.48	-	-	A1	SYBR Green I		1.01	3.43	None			85
255;132;197;238	H2	GAPDH	None	33.3	-	Positive	Unchecked	Positive control	-	31.45	1.48	-	-	A1	SYBR Green I		1.03	3.36	None			86
255;132;197;238	H3	GAPDH	None	32.86	-	Positive	Unchecked	Positive control	-	31.45	1.48	-	-	A1	SYBR Green I		0.81	3.02	None			87
255;132;197;238	H4	EGR1	None	19.11	-	Positive	Unchecked	Standard	-	22.55	1.57	-	-	A4	SYBR Green I		1.08	4	None			88
255;132;197;238	H5	EGR1	None	18.98	-	Positive	Unchecked	Standard	-	22.55	1.57	-	-	A4	SYBR Green I		1.22	4.29	None			89
255;132;197;238	H6	EGR1	None	19.05	-	Positive	Unchecked	Standard	-	22.55	1.57	-	-	A4	SYBR Green I		1.17	4.13	None			90
255;132;197;238	H7	mme1	None	-	-	Negative	Unchecked	Standard	-	-	-	-	-	A7	SYBR Green I		0.12	0.65	Standard is negative			91
255;132;197;238	H8	mme1	None	-	-	Negative	Unchecked	Standard	-	-	-	-	-	A7	SYBR Green I		0	-0.02	Standard is negative			92
255;132;197;238	H9	mme1	None	-	-	Negative	Unchecked	Standard	-	-	-	-	-	A7	SYBR Green I		0.11	0.62	Standard is negative			93
255;132;197;238	H10	prpt1	None	22.01	-	Positive	Unchecked	Standard	-	23.03	1.15	-	-	A10	SYBR Green I		0.57	2.72	None			94
255;132;197;238	H11	prpt1	None	21.95	-	Positive	Unchecked	Standard	-	23.03	1.15	-	-	A10	SYBR Green I		0.82	3.39	None			95
255;132;197;238	H12	prpt1	None	22.1	-	Positive	Unchecked	Standard	-	23.03	1.15	-	-	A10	SYBR Green I		0.76	3.23	None			96

## Sheet: primer test
Position	Sample Name	Cq
A1	1	-
A2	1	-
A3	1	-
A4	1	25.21
A5	1	25.24
A6	1	25.34
A7	1	30.79
A8	1	30.93
A9	1	30.36
A10	1	-
A11	1	-
A12	1	-
B1	gapdh	-
B2	gapdh	-
B3	gapdh	-
B4	gapdh	23.11
B5	gapdh	23.08
B6	gapdh	23.61
B7	PTTR2-1	29.01
B8	PTTR2-1	29.1
B9	PTTR2-1	29.41
B10	PTTR2-1	-
B11	PTTR2-1	-
B12	PTTR2-1	-
C1	gapdh	-
C2	gapdh	-
C3	gapdh	-
C4	gapdh	25.01
C5	gapdh	25.02
C6	gapdh	25.06
C7	PTTR2-1	31.59
C8	PTTR2-1	31.43
C9	PTTR2-1	31.37
C10	PTTR2-1	-
C11	PTTR2-1	-
C12	PTTR2-1	-
D1	gapdh	-
D2	gapdh	-
D3	gapdh	-
D4	gapdh	28.19
D5	gapdh	27.53
D6	gapdh	27.34
D7	PTTR2-1	30.9
D8	PTTR2-1	31.79
D9	PTTR2-1	31.38
D10	PTTR2-1	-
D11	PTTR2-1	-
D12	PTTR2-1	-
26	gapdh	-
26	gapdh	-
26	gapdh	-
26	FKBP5	23.99
26	FKBP5	23.69
26	FKBP5	23.76
26	MX1	30.98
26	MX1	30.99
26	MX1	30.88
21	FKBP5	24.22
21	FKBP5	24.24
21	FKBP5	24.12
21	MX1	31.9
21	MX1	31.75
21	MX1	31.92
27	FKBP5	27.96
27	FKBP5	28.01
27	FKBP5	28.05
27	MX1	34.28
27	MX1	33.09
27	MX1	33.29
24	FKBP5	25.71
24	FKBP5	25.56
24	FKBP5	25.86
24	MX1	30.39
24	MX1	31.87
24	MX1	30.75
