# Supplementary material for: MME and PTPRC: key renal biomarkers in lupus nephritis
Source: PeerJ. 2024 Sep 16;12:e18070. doi: 10.7717/peerj.18070 (PMC11412223; doi:10.7717/peerj.18070)
Supplement: Supplemental Information 10 [file peerj-12-18070-s010.xlsx]

## Sheet: RORC
C57
A62	Area	Mean	IntDen	RawIntDen	MinThr	MaxThr
1	251239	0.049	12288.4	57261257	0.082	0.025
2	340259	0.048	16465.2	77649910	0.08	0.017
3	321105	0.049	15834.6	73117354	0.08	0.023
4	319654	0.05	15965.1	72681009	0.076	0.019
5	222584	0.046	10173.9	51104643	0.078	0.017
6	280440	0.046	13034.4	64274417	0.078	0.023
7	222552	0.046	10296.5	51032145	0.078	0.017
8	308489	0.046	14173.2	70790720	0.078	0.019
9	359784	0.047	16848.2	82397206	0.08	0.016
10	344520	0.047	16293.5	78813112	0.076	0.023
28
1	349820	0.049	17070.5	79765392	0.076	0.023
2	299504	0.048	14374.6	68427502	0.076	0.019
3	308068	0.05	15486.3	70018880	0.078	0.019
4	342239	0.048	16458.5	78173265	0.076	0.017
5	362160	0.05	18180	82315882	0.078	0.025
6	334822	0.044	14891.2	77103911	0.076	0.023
7	333040	0.044	14674.2	76772333	0.08	0.017
8	341896	0.047	16097.9	78264624	0.076	0.017
9	256875	0.043	11156.7	59296665	0.076	0.016
10	274129	0.043	11693.3	63393568	0.078	0.016
30
1	324973	0.049	15984.6	74049021	0.08	0.016
2	336653	0.048	16232.9	76866839	0.08	0.023
3	171273	0.041	7040.38	39753268	0.076	0.016
4	239809	0.044	10565.5	55283830	0.08	0.017
5	204783	0.046	9510.85	46945159	0.08	0.025
6	225424	0.043	9729.45	52070421	0.082	0.019
7	173125	0.043	7447.42	40004768	0.08	0.019
8	224963	0.046	10353	51630638	0.08	0.019
9	322638	0.05	16273.1	73301816	0.08	0.017
10	218320	0.044	9617.53	50329179	0.082	0.016
36
1	325423	0.051	16737.6	73758861	0.076	0.017
2	264613	0.05	13326.5	60129121	0.082	0.017
3	290420	0.05	14420.9	66090042	0.078	0.025
4	198351	0.047	9287.24	45434612	0.082	0.016
5	228858	0.046	10641	52459861	0.078	0.019
6	367988	0.049	18155.7	83816788	0.082	0.016
7	378089	0.051	19257.7	85789924	0.08	0.023
8	287782	0.046	13263	66028526	0.076	0.016
9	267726	0.048	12723.5	61224789	0.08	0.023
10	216319	0.044	9601.43	49835409	0.084	0.017
37
1	330946	0.044	14641.3	76261423	0.078	0.016
2	351975	0.048	17036.8	80341247	0.08	0.017
3	342836	0.049	16813.6	78131809	0.076	0.023
4	353602	0.05	17685.7	80420149	0.082	0.017
5	305177	0.051	15525.8	69256632	0.076	0.023
6	380694	0.052	19731.9	86223157	0.082	0.016
7	317957	0.052	16379.1	72057247	0.082	0.023
8	411266	0.052	21203.2	93203183	0.084	0.019
9	419401	0.049	20512.7	95611156	0.082	0.023
10	315510	0.046	14440.6	72458150	0.078	0.016
39
1	227383	0.044	10039.9	52398641	0.076	0.017
2	322720	0.05	16281.8	73306166	0.08	0.019
3	325842	0.052	16914	73762156	0.08	0.023
4	335147	0.053	17645.3	75741743	0.082	0.025
5	334069	0.051	16925.4	75846290	0.076	0.017
6	405185	0.055	22119.5	91165397	0.08	0.023
7	353870	0.051	18068.1	80276367	0.078	0.019
8	459065	0.054	24997.8	103336037	0.082	0.016
9	392954	0.053	20970.4	88657010	0.076	0.025
10	403388	0.054	21964.3	90796953	0.08	0.019

## Sheet: MME
C57
A62
1
2
3
4
5
6
7
8
9
10
28
1
2
3
4
5
6
7
8
9
10
30
1
2
3
4
5
6
7
8
9
10
36
1
2
3
4
5
6
7
8
9
10
37
1
2
3
4
5
6
7
8
9
10
39

## Sheet: MX1
C57
A62
1
2
3
4
5
6
7
8
9
10
28
1
2
3
4
5
6
7
8
9
10
30
1
2
3
4
5
6
7
8
9
10
36
1
2
3
4
5
6
7
8
9
10
37
1
2
3
4
5
6
7
8
9
10
39

## Sheet: EGR1
C57
A62
1
2
3
4
5
6
7
8
9
10
28
1
2
3
4
5
6
7
8
9
10
30
1
2
3
4
5
6
7
8
9
10
36
1
2
3
4
5
6
7
8
9
10
37
1
2
3
4
5
6
7
8
9
10
39

## Sheet: PTPRC
C57
A62
1
2
3
4
5
6
7
8
9
10
28
1
2
3
4
5
6
7
8
9
10
30
1
2
3
4
5
6
7
8
9
10
36
1
2
3
4
5
6
7
8
9
10
37
1
2
3
4
5
6
7
8
9
10
39
