# Supplementary material for: MME and PTPRC: key renal biomarkers in lupus nephritis
Source: PeerJ. 2024 Sep 16;12:e18070. doi: 10.7717/peerj.18070 (PMC11412223; doi:10.7717/peerj.18070)
Supplement: Table S3 [file peerj-12-18070-s003.xlsx]

## Sheet: Legend
Sheet1: Analysis Comparison for up expression of Lupus
Sheet2: Analysis Comparison for down expression of Lupus

## Sheet: Sheet1
Sheet1: Analysis Comparison for over expression of Lupus
Analysis 1:	Group: Lupus Nephritis vs. Healthy Living Donor (Berthier Lupus Glom)
Analysis 2:	Lupus Nephritis: Age (Berthier Lupus Glom)
Analysis 3:	Lupus Nephritis: Body Mass Index (Berthier Lupus Glom)
Analysis 4:	Lupus Nephritis: GFR (MDRD) (Berthier Lupus Glom)
Analysis 5:	Lupus Nephritis: Proteinuria (Nephrotic vs. Subnephrotic) (Berthier Lupus Glom)
Analysis 6:	Lupus Nephritis: Sex (Berthier Lupus Glom)
Analysis 7:	WHO Lupus Nephritis Class: Class III vs. Class II (Berthier Lupus Glom)
Analysis 8:	WHO Lupus Nephritis Class: Class IV vs. Class II (Berthier Lupus Glom)
Analysis 9:	WHO Lupus Nephritis Class: Class IV vs. Class III (Berthier Lupus Glom)
Analysis 10:	NZBW Model 21 - 24 Weeks: Proteinuria (Mouse) Status (Berthier Lupus Mouse Kidney)
Analysis 11:	NZBW Model No Proteinuria (Mouse): Age 13 - 16 Weeks vs. 5 - 8 Weeks (Berthier Lupus Mouse Kidney)
Analysis 12:	NZBW Model No Proteinuria (Mouse): Age 21 - 24 Weeks vs. 13 - 16 Weeks (Berthier Lupus Mouse Kidney)
Analysis 13:	NZBW Model Proteinuria (Mouse): Age 33 - 36 Weeks vs. 21 - 24 Weeks (Berthier Lupus Mouse Kidney)
Analysis 14:	NZBW Model: Proteinuria (Mouse) 21 - 24 Weeks vs. No Proteinuria (Mouse) 13 - 16 Weeks (Berthier Lupus Mouse Kidney)
Analysis 15:	NZBW Model: Proteinuria (Mouse) 33 - 36 Weeks vs. No Proteinuria (Mouse) 13 - 16 Weeks (Berthier Lupus Mouse Kidney)
Analysis 16:	NZBW Model: Proteinuria (Mouse) 33 - 36 Weeks vs. No Proteinuria (Mouse) 21 - 24 Weeks (Berthier Lupus Mouse Kidney)
Analysis 17:	NZM2410 Model: Proteinuria (Mouse) Status (Berthier Lupus Mouse Kidney)
Analysis 18:	NZW/BXSB Model 13 - 20 Weeks: Proteinuria (Mouse) Status (Berthier Lupus Mouse Kidney)
Analysis 19:	NZW/BXSB Model No Proteinuria (Mouse): Age 13 - 16 Weeks and 17 - 20 Weeks vs. 5 - 8 Weeks (Berthier Lupus Mouse Kidney)
Analysis 20:	NZW/BXSB Model: Proteinuria (Mouse) 13 - 20 Weeks vs. No Proteinuria (Mouse) 5 - 8 Weeks (Berthier Lupus Mouse Kidney)
Analysis 21:	NZW/BXSB Model: Proteinuria (Mouse) Status (Berthier Lupus Mouse Kidney)
Analysis 22:	Group: Lupus Nephritis vs. Healthy Living Donor (Berthier Lupus TubInt)
Analysis 23:	Lupus Nephritis: Age (Berthier Lupus TubInt)
Analysis 24:	Lupus Nephritis: Body Mass Index (Berthier Lupus TubInt)
Analysis 25:	Lupus Nephritis: GFR (MDRD) (Berthier Lupus TubInt)
Analysis 26:	Lupus Nephritis: Proteinuria (Nephrotic vs. Subnephrotic) (Berthier Lupus TubInt)
Analysis 27:	Lupus Nephritis: Sex (Berthier Lupus TubInt)
Analysis 28:	WHO Lupus Nephritis Class: Class III vs. Class II (Berthier Lupus TubInt)
Analysis 29:	WHO Lupus Nephritis Class: Class IV vs. Class II (Berthier Lupus TubInt)
Analysis 30:	WHO Lupus Nephritis Class: Class IV vs. Class III (Berthier Lupus TubInt)
Analysis 31:	Group: Lupus Nephritis vs. Healthy Living Donor (ERCB Lupus Glom)
Analysis 32:	Group: Lupus Nephritis vs. Minimal Change Disease (ERCB Lupus Glom)
Analysis 33:	Group: Lupus Nephritis vs. Minimal Change Disease and Healthy Living Donor (ERCB Lupus Glom)
Analysis 34:	Group: Minimal Change Disease vs. Healthy Living Donor (ERCB Lupus Glom)
Analysis 35:	Lupus Nephritis: Age (ERCB Lupus Glom)
Analysis 36:	Lupus Nephritis: BUN (ERCB Lupus Glom)
Analysis 37:	Lupus Nephritis: GFR (CG) (ERCB Lupus Glom)
Analysis 38:	Lupus Nephritis: GFR (MDRD) (ERCB Lupus Glom)
Analysis 39:	Lupus Nephritis: Proteinuria (Nephrotic vs. Subnephrotic) (ERCB Lupus Glom)
Analysis 40:	Group: Lupus Nephritis vs. Healthy Living Donor (ERCB Lupus TubInt)
Analysis 41:	Group: Lupus Nephritis vs. Minimal Change Disease (ERCB Lupus TubInt)
Analysis 42:	Group: Lupus Nephritis vs. Minimal Change Disease and Healthy Living Donor (ERCB Lupus TubInt)
Analysis 43:	Group: Minimal Change Disease vs. Healthy Living Donor (ERCB Lupus TubInt)
Analysis 44:	Lupus Nephritis: Age (ERCB Lupus TubInt)
Analysis 45:	Lupus Nephritis: BUN (ERCB Lupus TubInt)
Analysis 46:	Lupus Nephritis: GFR (CG) (ERCB Lupus TubInt)
Analysis 47:	Lupus Nephritis: GFR (MDRD) (ERCB Lupus TubInt)
Analysis 48:	Lupus Nephritis: Proteinuria (Nephrotic vs. Subnephrotic) (ERCB Lupus TubInt)
Analysis 49:	Group: Lupus Nephritis vs. Normal Kidney (Peterson Lupus Glom)
Analysis 50:	Lupus Nephritis Race/Ethnicity: Asian (Peterson Lupus Glom)
Analysis 51:	Lupus Nephritis Race/Ethnicity: Black or African American (Peterson Lupus Glom)
Analysis 52:	Lupus Nephritis Race/Ethnicity: Hispanic (Peterson Lupus Glom)
Analysis 53:	Lupus Nephritis Race/Ethnicity: White (Peterson Lupus Glom)
Analysis 54:	Lupus Nephritis: Activity Index Quartile (Peterson Lupus Glom)
Analysis 55:	Lupus Nephritis: Age (Peterson Lupus Glom)
Analysis 56:	Lupus Nephritis: Chronicity Index Quartile (Peterson Lupus Glom)
Analysis 57:	Lupus Nephritis: GFR (MDRD) (Peterson Lupus Glom)
Analysis 58:	Lupus Nephritis: Glomerulosclerosis (Peterson Lupus Glom)
Analysis 59:	Lupus Nephritis: Hemoglobin (Peterson Lupus Glom)
Analysis 60:	Lupus Nephritis: Sex (Peterson Lupus Glom)								****	Red P≤ 0.001																										****	Red P≤ 0.001
Analysis 61:	Lupus Nephritis: Tubular Atrophy and Interstitial Fibrosis (Peterson Lupus Glom)								***	Blue P≤0.01																										***	Blue P≤0.01
Analysis 62:	WHO Lupus Nephritis Class: Class IV vs. Class III (Peterson Lupus Glom)								**	Green P≤0.05																										**	Green P≤0.05
									*	Yellow P≤0.1																										*	Yellow P≤0.1
		Analysis 1		Analysis 2		Analysis 3		Analysis 4		Analysis 5		Analysis 6		Analysis 7		Analysis 8		Analysis 9		Analysis 10		Analysis 11		Analysis 12		Analysis 13		Analysis 14		Analysis 15		Analysis 16		Analysis 17		Analysis 18		Analysis 19		Analysis 20		Analysis 21		Analysis 22		Analysis 23		Analysis 24
Gene Name	Gene Symbol	Gene Rank	P-Value	Gene Rank	P-Value	Gene Rank	P-Value	Gene Rank	P-Value	Gene Rank	P-Value	Gene Rank	P-Value	Gene Rank	P-Value	Gene Rank	P-Value	Gene Rank	P-Value	Gene Rank	P-Value	Gene Rank	P-Value	Gene Rank	P-Value	Gene Rank	P-Value	Gene Rank	P-Value	Gene Rank	P-Value	Gene Rank	P-Value	Gene Rank	P-Value	Gene Rank	P-Value	Gene Rank	P-Value	Gene Rank	P-Value	Gene Rank	P-Value	Gene Rank	P-Value	Gene Rank	P-Value	Gene Rank	P-Value
protein tyrosine phosphatase, receptor type, C	PTPRC	29	3.25e-15	4987	0.646	9835	0.952	61	0.502	693	0.053	9249	0.678	190	0.008	1502	0.072	12133	0.894	674	0.011	7126	0.409	1669	0.079	4339	0.163	430	0.008	85	3.05e-05	109	6.98e-05	295	0.000707	602	0.001	6325	0.337	164	0.000283	279	0.000113	321	7.09e-07	10727	0.897	1553	0.546
myxovirus (influenza virus) resistance 1, interferon-inducible protein p78 (mouse)	MX1	23	6.3e-16	1794	0.548	8238	0.897	8934	0.825	11321	0.89	6231	0.396	5971	0.517	7390	0.557	8725	0.53	-	-	-	-	-	-	-	-	-	-	-	-	-	-	-	-	-	-	-	-	-	-	-	-	4	1.3e-17	1728	0.546	11578	0.953
FK506 binding protein 5	FKBP5	9449	0.949	4111	0.618	2783	0.629	10791	0.914	2194	0.172	5673	0.354	2482	0.188	11155	0.898	12580	0.986	7614	0.662	2450	0.071	3488	0.214	4011	0.138	4450	0.402	2578	0.089	3188	0.166	1963	0.025	7169	0.773	5786	0.289	6882	0.655	6832	0.737	12311	1	3578	0.602	4629	0.652
early growth response 1	EGR1	9962	0.973	11412	0.921	4958	0.746	6324	0.712	59	0.003	12107	0.975	484	0.024	8	5.99e-05	6851	0.378	1101	0.025	7685	0.457	14163	0.981	1740	0.028	10980	0.909	5890	0.527	531	0.001	253	0.000558	7484	0.805	4939	0.222	5781	0.53	7290	0.786	11678	0.999	3690	0.605	6443	0.723
zinc finger and BTB domain containing 16	ZBTB16	9633	0.958	3845	0.61	2651	0.622	7998	0.783	2381	0.186	5332	0.328	4168	0.346	12096	0.972	12611	0.996	14670	1	451	0.006	8461	0.649	407	0.003	14545	0.998	6542	0.616	5750	0.493	1950	0.025	7650	0.82	4922	0.221	7300	0.693	7330	0.789	8597	0.91	2362	0.565	3409	0.606
RAR-related orphan receptor C	RORC	12011	1	7949	0.756	10935	0.979	11500	0.951	12354	0.982	1695	0.094	11221	0.932	12036	0.969	9417	0.59	4931	0.331	2135	0.057	10646	0.819	9974	0.812	6380	0.614	9622	0.91	8313	0.78	8228	0.77	9424	0.93	2679	0.09	7046	0.671	9264	0.919	12609	1	1457	0.539	6249	0.715
membrane metallo-endopeptidase	MME	11783	0.999	1016	0.526	6369	0.816	12324	0.988	12080	0.958	31	0.000348	11638	0.956	12315	0.986	9935	0.64	8099	0.715	2941	0.095	11248	0.856	13787	0.993	10685	0.898	14350	1	14665	1	9100	0.848	14675	1	2177	0.068	14272	0.998	14624	1	9807	0.979	4679	0.638	9663	0.864
[truncated: 78 more columns]

## Sheet: Sheet2
Sheet2: Analysis Comparison for down expression of Lupus
Analysis 1:	Group: Lupus Nephritis vs. Healthy Living Donor (Berthier Lupus Glom)
Analysis 2:	Lupus Nephritis: Age (Berthier Lupus Glom)
Analysis 3:	Lupus Nephritis: Body Mass Index (Berthier Lupus Glom)
Analysis 4:	Lupus Nephritis: GFR (MDRD) (Berthier Lupus Glom)
Analysis 5:	Lupus Nephritis: Proteinuria (Nephrotic vs. Subnephrotic) (Berthier Lupus Glom)
Analysis 6:	Lupus Nephritis: Sex (Berthier Lupus Glom)
Analysis 7:	WHO Lupus Nephritis Class: Class III vs. Class II (Berthier Lupus Glom)
Analysis 8:	WHO Lupus Nephritis Class: Class IV vs. Class II (Berthier Lupus Glom)
Analysis 9:	WHO Lupus Nephritis Class: Class IV vs. Class III (Berthier Lupus Glom)
Analysis 10:	NZBW Model 21 - 24 Weeks: Proteinuria (Mouse) Status (Berthier Lupus Mouse Kidney)
Analysis 11:	NZBW Model No Proteinuria (Mouse): Age 13 - 16 Weeks vs. 5 - 8 Weeks (Berthier Lupus Mouse Kidney)
Analysis 12:	NZBW Model No Proteinuria (Mouse): Age 21 - 24 Weeks vs. 13 - 16 Weeks (Berthier Lupus Mouse Kidney)
Analysis 13:	NZBW Model Proteinuria (Mouse): Age 33 - 36 Weeks vs. 21 - 24 Weeks (Berthier Lupus Mouse Kidney)
Analysis 14:	NZBW Model: Proteinuria (Mouse) 21 - 24 Weeks vs. No Proteinuria (Mouse) 13 - 16 Weeks (Berthier Lupus Mouse Kidney)
Analysis 15:	NZBW Model: Proteinuria (Mouse) 33 - 36 Weeks vs. No Proteinuria (Mouse) 13 - 16 Weeks (Berthier Lupus Mouse Kidney)
Analysis 16:	NZBW Model: Proteinuria (Mouse) 33 - 36 Weeks vs. No Proteinuria (Mouse) 21 - 24 Weeks (Berthier Lupus Mouse Kidney)
Analysis 17:	NZM2410 Model: Proteinuria (Mouse) Status (Berthier Lupus Mouse Kidney)
Analysis 18:	NZW/BXSB Model 13 - 20 Weeks: Proteinuria (Mouse) Status (Berthier Lupus Mouse Kidney)
Analysis 19:	NZW/BXSB Model No Proteinuria (Mouse): Age 13 - 16 Weeks and 17 - 20 Weeks vs. 5 - 8 Weeks (Berthier Lupus Mouse Kidney)
Analysis 20:	NZW/BXSB Model: Proteinuria (Mouse) 13 - 20 Weeks vs. No Proteinuria (Mouse) 5 - 8 Weeks (Berthier Lupus Mouse Kidney)
Analysis 21:	NZW/BXSB Model: Proteinuria (Mouse) Status (Berthier Lupus Mouse Kidney)
Analysis 22:	Group: Lupus Nephritis vs. Healthy Living Donor (Berthier Lupus TubInt)
Analysis 23:	Lupus Nephritis: Age (Berthier Lupus TubInt)
Analysis 24:	Lupus Nephritis: Body Mass Index (Berthier Lupus TubInt)
Analysis 25:	Lupus Nephritis: GFR (MDRD) (Berthier Lupus TubInt)
Analysis 26:	Lupus Nephritis: Proteinuria (Nephrotic vs. Subnephrotic) (Berthier Lupus TubInt)
Analysis 27:	Lupus Nephritis: Sex (Berthier Lupus TubInt)
Analysis 28:	WHO Lupus Nephritis Class: Class III vs. Class II (Berthier Lupus TubInt)
Analysis 29:	WHO Lupus Nephritis Class: Class IV vs. Class II (Berthier Lupus TubInt)
Analysis 30:	WHO Lupus Nephritis Class: Class IV vs. Class III (Berthier Lupus TubInt)
Analysis 31:	Group: Lupus Nephritis vs. Healthy Living Donor (ERCB Lupus Glom)
Analysis 32:	Group: Lupus Nephritis vs. Minimal Change Disease (ERCB Lupus Glom)
Analysis 33:	Group: Lupus Nephritis vs. Minimal Change Disease and Healthy Living Donor (ERCB Lupus Glom)
Analysis 34:	Group: Minimal Change Disease vs. Healthy Living Donor (ERCB Lupus Glom)
Analysis 35:	Lupus Nephritis: Age (ERCB Lupus Glom)
Analysis 36:	Lupus Nephritis: BUN (ERCB Lupus Glom)
Analysis 37:	Lupus Nephritis: GFR (CG) (ERCB Lupus Glom)
Analysis 38:	Lupus Nephritis: GFR (MDRD) (ERCB Lupus Glom)
Analysis 39:	Lupus Nephritis: Proteinuria (Nephrotic vs. Subnephrotic) (ERCB Lupus Glom)
Analysis 40:	Group: Lupus Nephritis vs. Healthy Living Donor (ERCB Lupus TubInt)
Analysis 41:	Group: Lupus Nephritis vs. Minimal Change Disease (ERCB Lupus TubInt)
Analysis 42:	Group: Lupus Nephritis vs. Minimal Change Disease and Healthy Living Donor (ERCB Lupus TubInt)
Analysis 43:	Group: Minimal Change Disease vs. Healthy Living Donor (ERCB Lupus TubInt)
Analysis 44:	Lupus Nephritis: Age (ERCB Lupus TubInt)
Analysis 45:	Lupus Nephritis: BUN (ERCB Lupus TubInt)
Analysis 46:	Lupus Nephritis: GFR (CG) (ERCB Lupus TubInt)
Analysis 47:	Lupus Nephritis: GFR (MDRD) (ERCB Lupus TubInt)
Analysis 48:	Lupus Nephritis: Proteinuria (Nephrotic vs. Subnephrotic) (ERCB Lupus TubInt)
Analysis 49:	Group: Lupus Nephritis vs. Normal Kidney (Peterson Lupus Glom)
Analysis 50:	Lupus Nephritis Race/Ethnicity: Asian (Peterson Lupus Glom)
Analysis 51:	Lupus Nephritis Race/Ethnicity: Black or African American (Peterson Lupus Glom)
Analysis 52:	Lupus Nephritis Race/Ethnicity: Hispanic (Peterson Lupus Glom)
Analysis 53:	Lupus Nephritis Race/Ethnicity: White (Peterson Lupus Glom)
Analysis 54:	Lupus Nephritis: Activity Index Quartile (Peterson Lupus Glom)
Analysis 55:	Lupus Nephritis: Age (Peterson Lupus Glom)
Analysis 56:	Lupus Nephritis: Chronicity Index Quartile (Peterson Lupus Glom)
Analysis 57:	Lupus Nephritis: GFR (MDRD) (Peterson Lupus Glom)
Analysis 58:	Lupus Nephritis: Glomerulosclerosis (Peterson Lupus Glom)
Analysis 59:	Lupus Nephritis: Hemoglobin (Peterson Lupus Glom)																****	Red P≤ 0.001																	****	Red P≤ 0.001
Analysis 60:	Lupus Nephritis: Sex (Peterson Lupus Glom)																***	Blue P≤0.01																	***	Blue P≤0.01
Analysis 61:	Lupus Nephritis: Tubular Atrophy and Interstitial Fibrosis (Peterson Lupus Glom)																**	Green P≤0.05																	**	Green P≤0.05
Analysis 62:	WHO Lupus Nephritis Class: Class IV vs. Class III (Peterson Lupus Glom)																*	Yellow P≤0.1																	*	Yellow P≤0.1
		Analysis 1		Analysis 2		Analysis 3		Analysis 4		Analysis 5		Analysis 6		Analysis 7		Analysis 8		Analysis 9		Analysis 10		Analysis 11		Analysis 12		Analysis 13		Analysis 14		Analysis 15		Analysis 16		Analysis 17		Analysis 18		Analysis 19		Analysis 20		Analysis 21		Analysis 22		Analysis 23		Analysis 24
Gene Name	Gene Symbol	Gene Rank	P-Value	Gene Rank	P-Value	Gene Rank	P-Value	Gene Rank	P-Value	Gene Rank	P-Value	Gene Rank	P-Value	Gene Rank	P-Value	Gene Rank	P-Value	Gene Rank	P-Value	Gene Rank	P-Value	Gene Rank	P-Value	Gene Rank	P-Value	Gene Rank	P-Value	Gene Rank	P-Value	Gene Rank	P-Value	Gene Rank	P-Value	Gene Rank	P-Value	Gene Rank	P-Value	Gene Rank	P-Value	Gene Rank	P-Value	Gene Rank	P-Value	Gene Rank	P-Value	Gene Rank	P-Value	Gene Rank	P-Value
membrane metallo-endopeptidase	MME	94	2.92e-08	1016	0.526	6369	0.816	12324	0.988	285	0.009	12522	0.992	1160	0.023	200	0.003	3759	0.323	6711	0.285	11864	0.905	3554	0.144	1007	0.007	4126	0.102	442	0.000269	125	6.45e-05	5706	0.152	117	5.42e-05	12624	0.932	519	0.002	166	3.05e-05	3555	0.009	4679	0.638	9663	0.864
RAR-related orphan receptor C	RORC	1053	0.000174	7949	0.756	10935	0.979	11500	0.951	499	0.018	11714	0.906	2590	0.068	1136	0.031	4987	0.41	9869	0.669	12670	0.943	4158	0.181	4825	0.188	8427	0.386	5181	0.09	6489	0.22	6579	0.23	5383	0.07	12126	0.91	7760	0.329	5541	0.081	28	3.5e-08	1457	0.539	6249	0.715
early growth response 1	EGR1	3767	0.021	11412	0.921	4958	0.746	6324	0.712	12311	0.961	121	0.000735	11879	0.918	12604	0.999	4329	0.36	13695	0.975	7127	0.543	633	0.019	13068	0.972	3830	0.091	8919	0.473	14261	0.999	14538	0.999	7324	0.195	9862	0.778	9026	0.47	7518	0.214	212	3.06e-06	3690	0.605	6443	0.723
FK506 binding protein 5	FKBP5	4716	0.051	4111	0.618	2783	0.629	10791	0.914	11259	0.828	8816	0.646	11109	0.812	2599	0.102	95	0.014	7195	0.338	12356	0.929	11316	0.786	10794	0.862	10351	0.598	12225	0.911	11620	0.834	12831	0.975	7637	0.227	9017	0.711	7924	0.345	7976	0.263	618	3.67e-05	3578	0.602	4629	0.652
myxovirus (influenza virus) resistance 1, interferon-inducible protein p78 (mouse)	MX1	12610	1	1794	0.548	8238	0.897	8934	0.825	2252	0.11	8327	0.604	8498	0.483	7159	0.443	5787	0.47	-	-	-	-	-	-	-	-	-	-	-	-	-	-	-	-	-	-	-	-	-	-	-	-	12621	1	1728	0.546	11578	0.953
protein tyrosine phosphatase, receptor type, C	PTPRC	12553	1	4987	0.646	9835	0.952	61	0.502	10547	0.746	3990	0.235	11913	0.922	9195	0.659	350	0.045	14118	0.989	7686	0.591	13129	0.921	10466	0.837	14360	0.992	14705	1	14681	1	14496	0.999	14190	0.999	8482	0.663	14628	1	14514	1	12013	1	10727	0.897	1553	0.546
zinc finger and BTB domain containing 16	ZBTB16	4478	0.042	3845	0.61	2651	0.622	7998	0.783	11139	0.814	9092	0.672	9938	0.654	1031	0.028	35	0.004	120	6.54e-05	14343	0.994	6345	0.351	14386	0.997	247	0.002	8265	0.384	9055	0.507	12844	0.975	7158	0.18	9879	0.779	7506	0.307	7478	0.211	5729	0.09	2362	0.565	3409	0.606
[truncated: 78 more columns]
