# Supplementary material for: MME and PTPRC: key renal biomarkers in lupus nephritis
Source: PeerJ. 2024 Sep 16;12:e18070. doi: 10.7717/peerj.18070 (PMC11412223; doi:10.7717/peerj.18070)
Supplement: Table S4 [file peerj-12-18070-s004.xlsx]

## Sheet: ROC-G
supplementary Table S4：Diagnostic ROC curves analysis of DEGs based on glomerulus and tubules respectively
Predictor Variable	Predicted Outcome	Area Under the Curve (AUC)	Confidence Interval (CI)	Cut-off Value	Sensitivity	Specificity	Accuracy
FCER1G	Negative	0.931	0.841 – 1.000	3.59	0.88889	0.88235	0.88372
CR1	Positive	1	1.000 – 1.000	6.855	1	1	1
MME	Positive	1	1.000 – 1.000	9.165	1	1	1
CD45R0	Negative	0.908	0.820 – 0.997	3.645	1	0.76471	0.81395
ZBTB16	Positive	0.794	0.660 – 0.929	7.41	0.88889	0.67647	0.72093
TGFBI	Negative	0.886	0.786 – 0.985	5.3	1	0.76471	0.81395
SPP1	Negative	0.791	0.650 – 0.932	6.465	1	0.55882	0.65116
SYK	Negative	0.948	0.881 – 1.000	1.635	1	0.91176	0.93023
MX1	Negative	0.899	0.799 – 0.999	5.59	1	0.67647	0.74419
HLA-DRB1	Positive	0.784	0.635 – 0.934	4.69	0.88889	0.64706	0.69767
RORC	Positive	0.967	0.918 – 1.000	5.16	1	0.94118	0.95349
CCL2	Negative	0.837	0.719 – 0.954	5.43	1	0.73529	0.7907
MSR1	Negative	0.948	0.878 – 1.000	3.03	1	0.88235	0.90698
FYN	Positive	0.956	0.901 – 1.000	7.12	1	0.88235	0.90698
PTPRC_all	Negative	0.876	0.715 – 1.000	2.5	0.88889	0.88235	0.88372
FN1	Negative	0.73	0.586 – 0.875	6.51	1	0.64706	0.72093
FKBP5	Positive	0.791	0.643 – 0.939	5.285	0.88889	0.70588	0.74419
C1QB	Negative	0.856	0.740 – 0.973	4.875	0.77778	0.85294	0.83721
TGFBR2	Positive	0.935	0.859 – 1.000	7.585	1	0.76471	0.81395
TRAF5	Positive	0.887	0.782 – 0.992	5.18	1	0.73529	0.7907
BST1	Positive	0.987	0.962 – 1.000	4.52	1	0.94118	0.95349
CYBB	Negative	0.913	0.828 – 0.999	4.61	1	0.76471	0.81395
EGR1	Positive	0.82	0.673 – 0.968	6.585	1	0.58824	0.67442
SMAD5	Positive	0.941	0.873 – 1.000	5.8	1	0.85294	0.88372
IL4R	Positive	0.859	0.733 – 0.986	6.23	0.88889	0.85294	0.86047

## Sheet: ROC-T
Predictor Variable	Predicted Outcome	Area Under the Curve (AUC)	Confidence Interval (CI)	Cut-off Value	Sensitivity	Specificity	Accuracy
ZBTB16	Positive	0.864	0.737 – 0.992	7.285	0.9	0.82222	0.83636
EGR1	Positive	0.971	0.931 – 1.000	8.655	0.9	0.95556	0.94545
RORC	Positive	0.959	0.895 – 1.000	7.01	0.9	0.93333	0.92727
PTPRC_all	Negative	0.93	0.828 – 1.000	3.24	0.9	0.88889	0.89091
MME	Positive	0.932	0.866 – 0.999	7.645	1	0.8	0.83636
STAT1	Negative	0.934	0.863 – 1.000	4.72	0.9	0.91111	0.90909
CCL19	Negative	0.904	0.824 – 0.985	4.51	1	0.75556	0.8
MX1	Negative	0.839	0.692 – 0.986	5.765	0.9	0.77778	0.8
C1R	Negative	0.858	0.749 – 0.967	5.5	1	0.62222	0.69091
THY1	Positive	0.913	0.836 – 0.991	7.805	1	0.75556	0.8
C2	Negative	0.95	0.897 – 1.000	3.795	1	0.86667	0.89091
ARG2	Positive	0.963	0.919 – 1.000	7.245	1	0.86667	0.89091
IFI35	Negative	0.789	0.602 – 0.975	3.845	0.9	0.62222	0.67273
IFI16	Negative	0.927	0.856 – 0.997	4.18	1	0.75556	0.8
CD9	Positive	0.809	0.669 – 0.949	6.355	0.9	0.68889	0.72727
IL6R	Positive	0.931	0.864 – 0.998	5.485	1	0.8	0.83636
C1S	Negative	0.867	0.769 – 0.964	4.465	1	0.68889	0.74545
MRC1	Positive	0.751	0.614 – 0.888	5.11	1	0.53333	0.61818
LITAF	Positive	0.974	0.936 – 1.000	7.88	1	0.93333	0.94545
HLA-DRB3	Negative	0.922	0.851 – 0.993	7.27	1	0.84444	0.87273
FKBP5	Positive	0.732	0.557 – 0.908	5.85	0.8	0.71111	0.72727
CFD	Negative	0.866	0.763 – 0.968	3.735	1	0.66667	0.72727
CCL5	Negative	0.771	0.642 – 0.900	4.66	0.8	0.75556	0.76364
TFRC	Positive	0.898	0.815 – 0.980	5.64	1	0.82222	0.85455
